# Supplementary material for: Defects in lysosomal function and lipid metabolism in human microglia harboring a TREM2 loss of function mutation
Source: Springer Nature journal article supplement (doi:10.1007/s00401-023-02568-y), 2023-04-28

Supplementary Figure 1

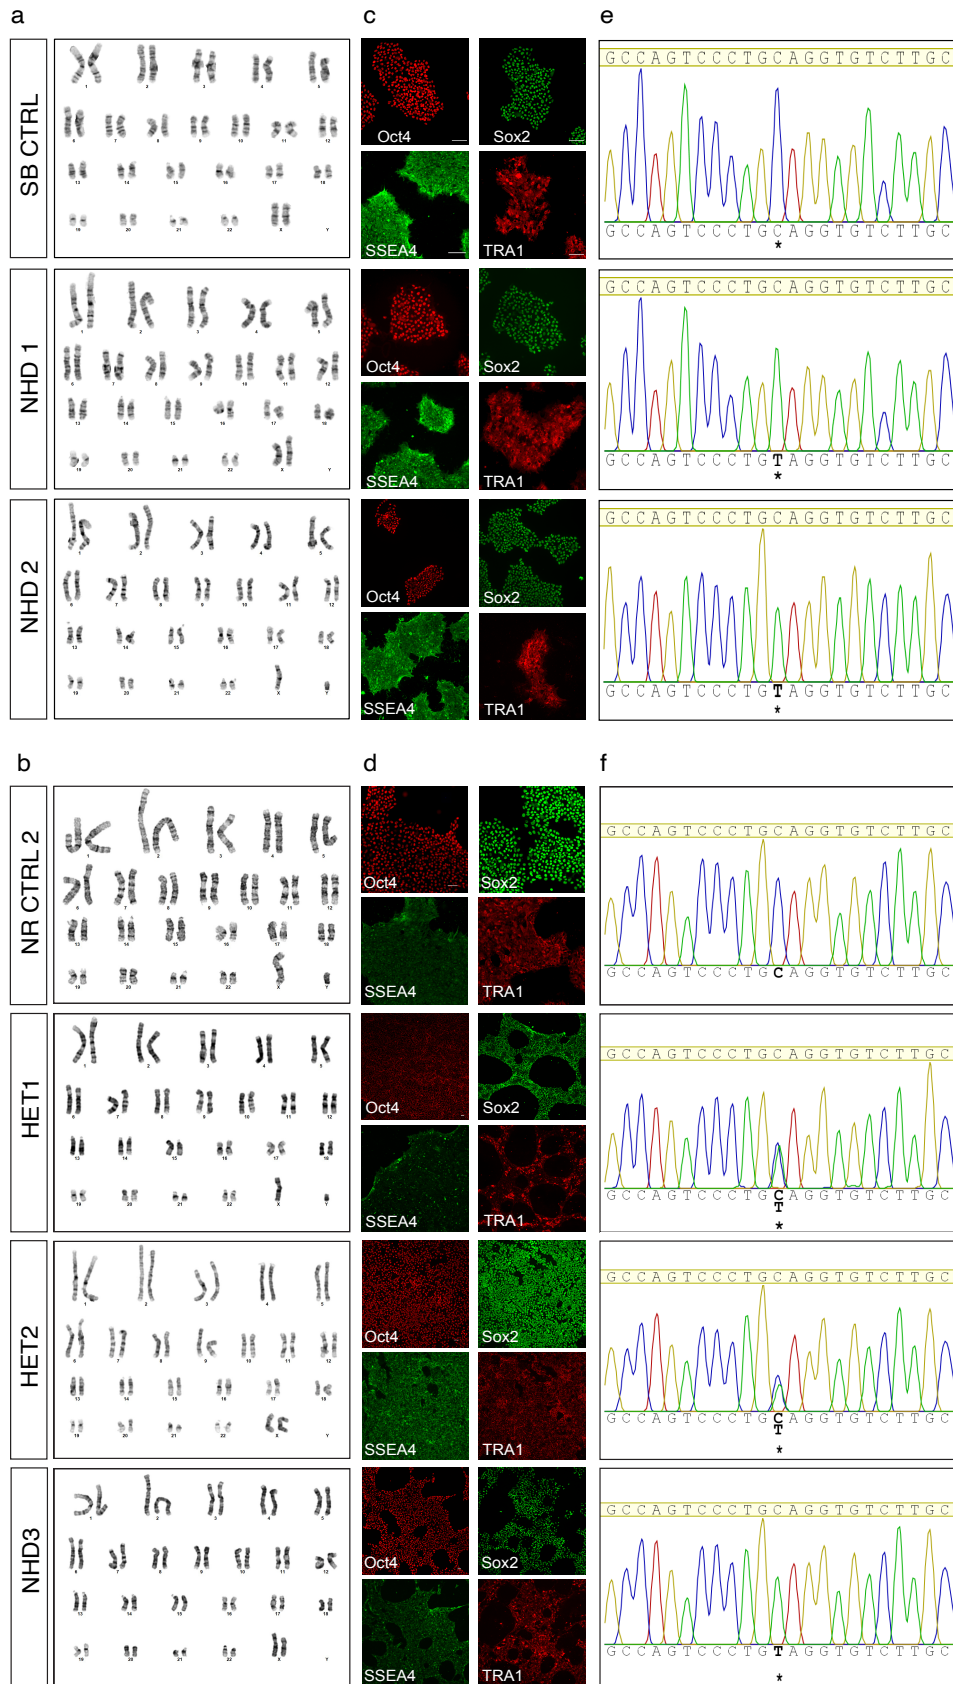

## Supplementary Figure 2

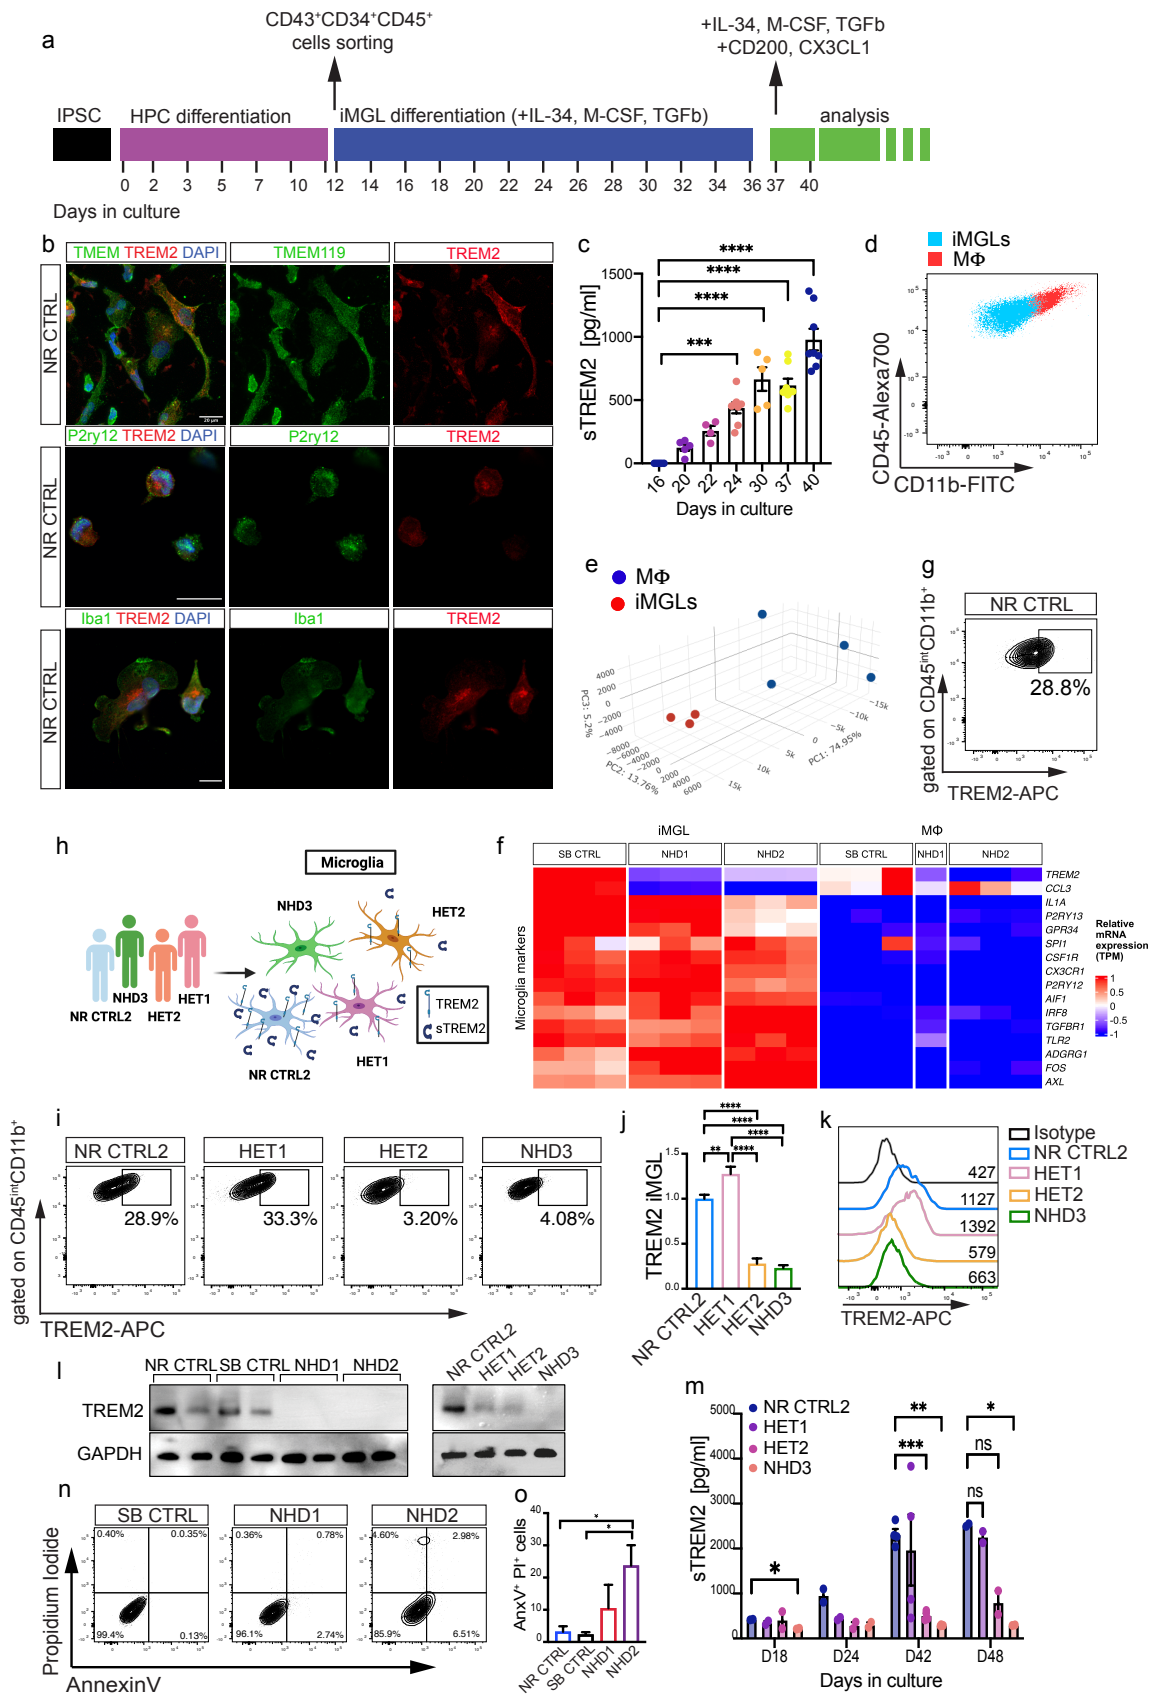

# Supplementary Figure 3

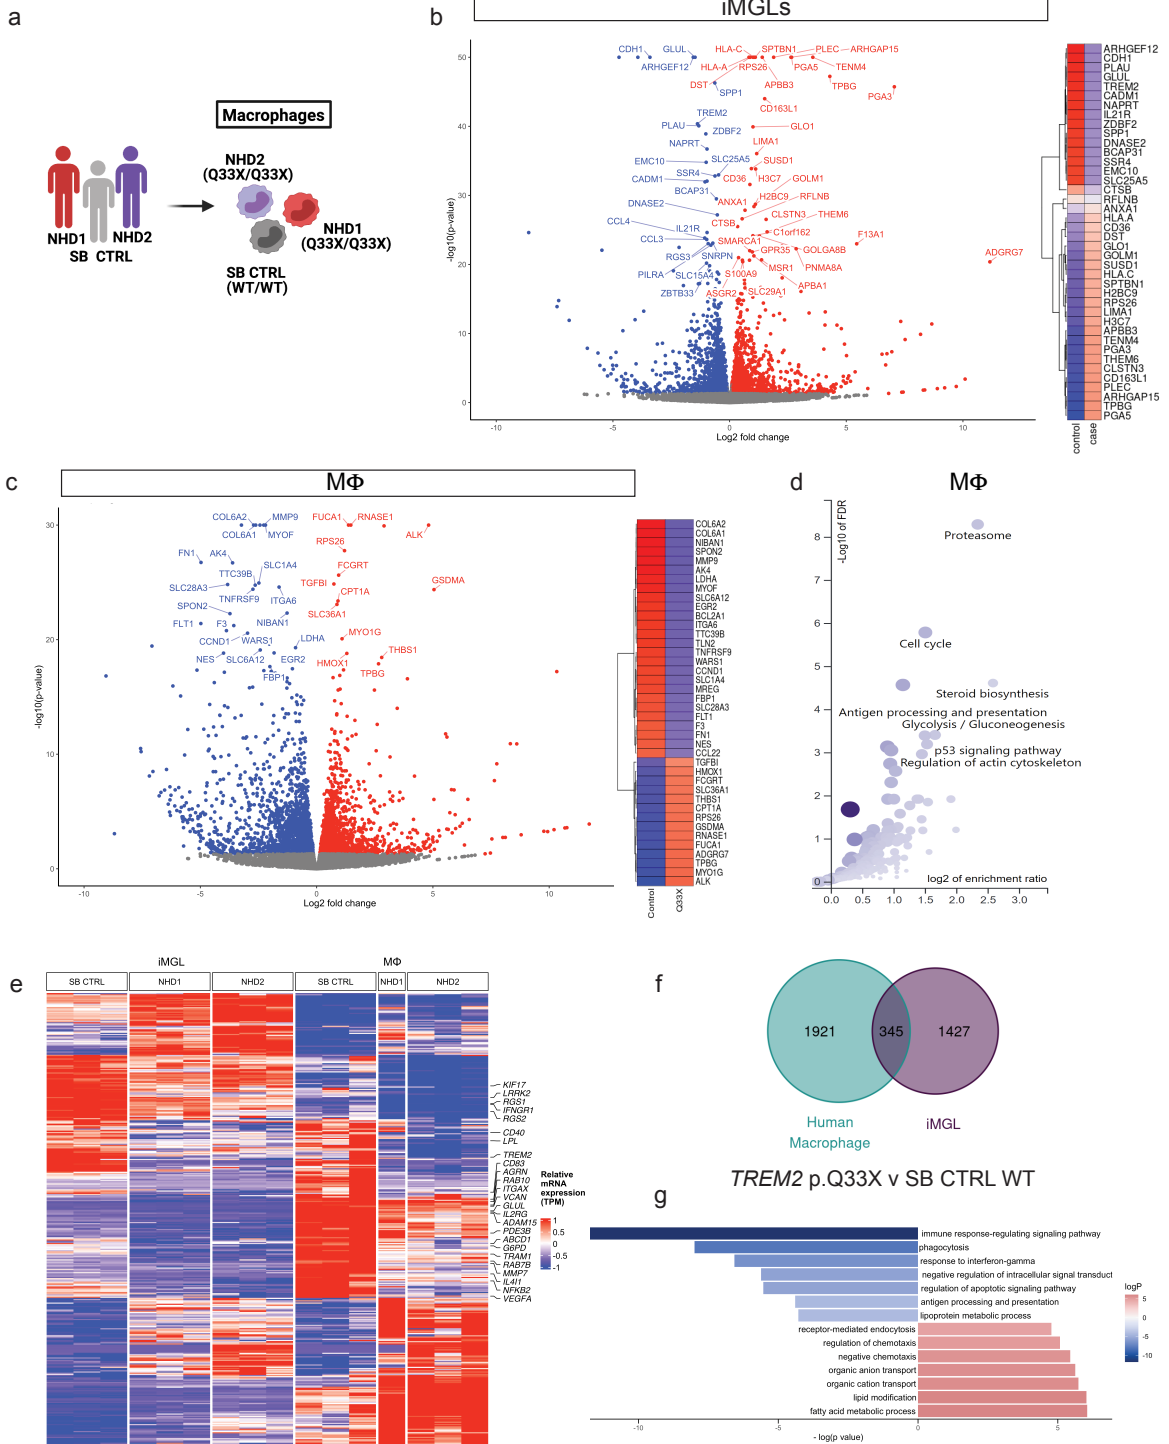

Supplementary Figure 4

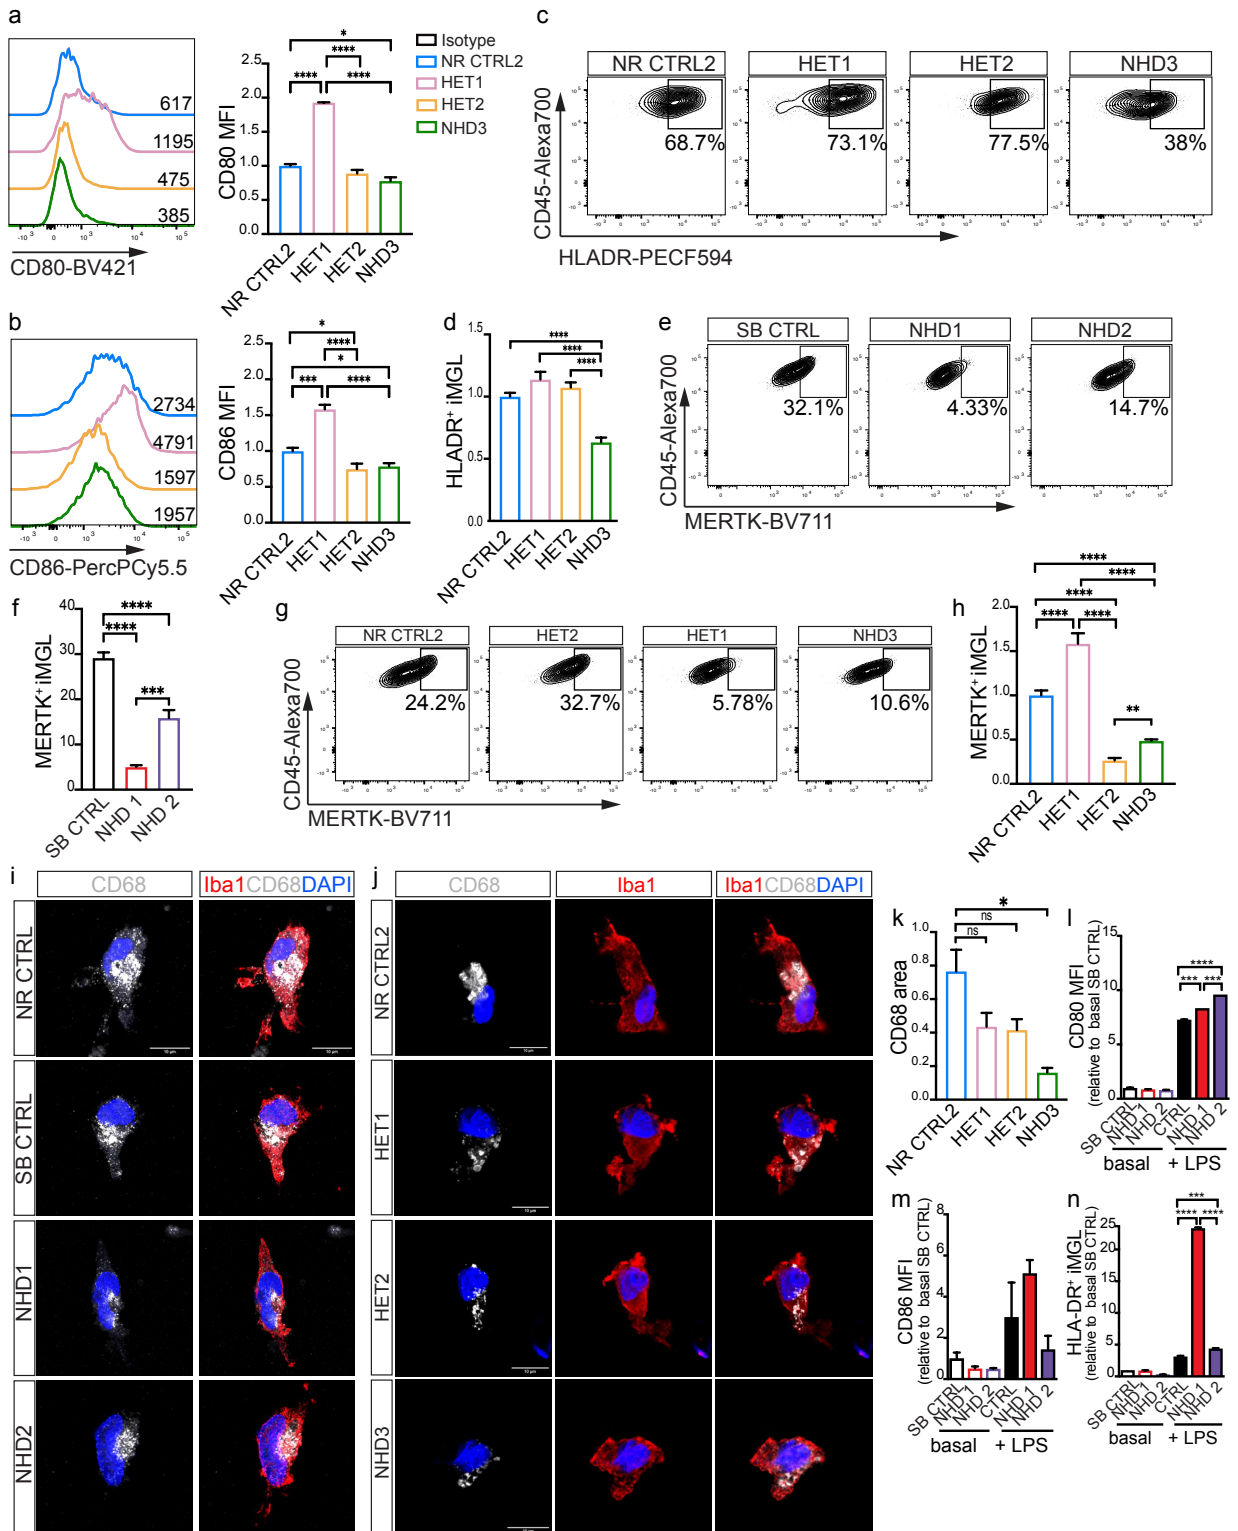

Supplementary Figure 5

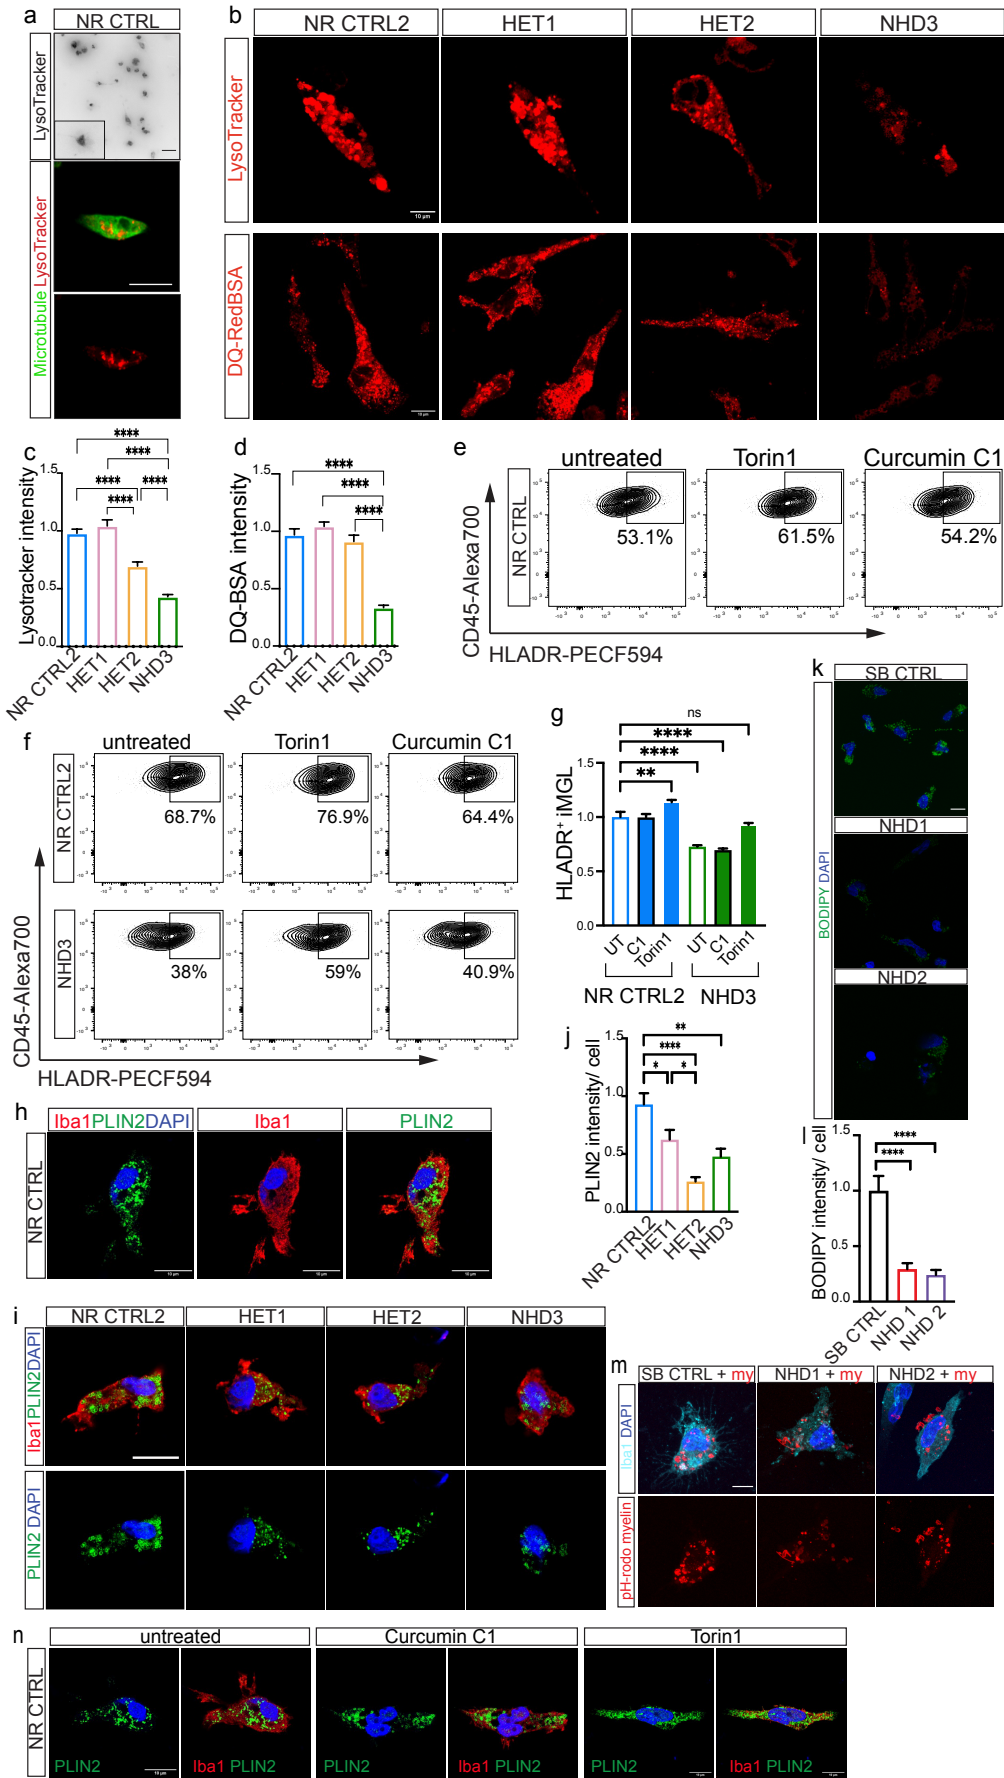

Supplementary Figure 6

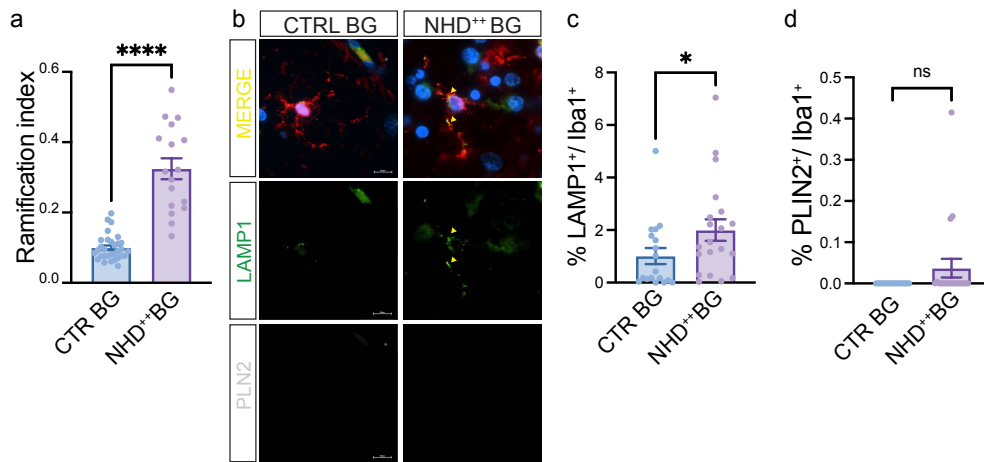

Supplement: MOESM1 [file 25295216]
