# Supplementary material for: Defects in lysosomal function and lipid metabolism in human microglia harboring a TREM2 loss of function mutation
Source: Acta Neuropathol. 2023 Apr 28;145(6):749–72. doi: 10.1007/s00401-023-02568-y (PMC10175346; doi:10.1007/s00401-023-02568-y)
Supplement: Supplementary file 2 — Supplementary file2 (XLSX 770 KB) [file 401_2023_2568_MOESM2_ESM.xlsx]

## Sheet: Table S1
Supplemental Table 1: Characteristics of patient samples used in the study
Sample ID	Affected Status	TREM2 mutation	Sex	Age at biopsy	Clinical manifestations	References	Tissue Type/region	Analyses
NHD1	NHD	TREM2 p.Q33X/Q33X	Female	45	Changes in personality with progressive decline in cognitive function, multiple bone fractures, with brain imaging showing basal ganglia calcification and cerebral atrophy	Veronika Bock, 2013	Fibroblasts, PBMC, iPSC	RNA-seq, biochemical assays
NHD2	NHD	TREM2 p.Q33X/Q33X	Male	46	Changes in personality with progressive decline in cognitive function, multiple bone fractures, with brain imaging showing basal ganglia calcification and cerebral atrophy	Veronika Bock, 2013	Fibroblasts, PBMC, iPSC	RNA-seq, biochemical assays
SB CTR	Unaffectected	TREM WT/WT	Female	49	None		Fibroblasts, PBMC, iPSC	RNA-seq, biochemical assays
NR CTRL	Unaffectected	TREM WT/WT	Female	76	None	Karch et al 2019	Fibroblasts, iPSC	RNA-seq, biochemical assays
NHD3	NHD	TREM2 p.Q33X/Q33X	Female	39	Changes in personality with progressive decline in cognitive function, multiple bone fractures, with brain imaging showing basal ganglia calcification and cerebral atrophy	Ghezzi et al. 2017	Fibroblasts, iPSC	biochemical assays
HET1	Unaffectected	TREM2 p.Q33X/WT	Male	72	None	Ghezzi et al. 2017	Fibroblasts, iPSC	biochemical assays
HET2	Unaffectected	TREM2 p.Q33X/WT	Female	72	None	Ghezzi et al. 2017	Fibroblasts, iPSC	biochemical assays
NR CTRL2	Unaffectected	TREM WT/WT	Male	65	None		Fibroblasts, iPSC	biochemical assays
NHD+	NHD	TREM2 p.D134G/D134G	Male	50	History of progressive dementia and generalized seizures; multiple lytic bone lesions. CT scans showed moderate cortical atrophy and calcifications in the basal ganglia.	Paloneva et al., 2002	Brain: Hippocampus, Frontal Lobe White Matter	Nanostring, IHC
NHD++	NHD	TYROBP c.141delG/c.141delG	Male	38	Loss of social inhibitions; profound dementia, loss of mobility and death. Intense astrogliosis, diffuse demyelination, axonal loss, accumulation of axonal spheroids and calcifications in the basal ganglia	Satoh et al., 2014	Brain: Hippocampus, Basal Ganglia	Nanostring, IHC
NHD+++	NHD	TYROBP c.141delG/c.141delG	Female	48	Loss of social inhibitions; profound dementia, loss of mobility and death. Intense astrogliosis, diffuse demyelination, axonal loss, accumulation of axonal spheroids and calcifications in the basal ganglia	Satoh et al., 2014	Brain: Hippocampus	Nanostring
NHD+++	NHD	TREM2 c.482+2T>C/c.482+2T>C	Male	39	History of epileptic seizures; at age 33 was diagnosed with NHD, became bedridden and died	Numasawa et al., 2011	Brain: Hippocampus	Nanostring
MS1	MS	TREM WT/WT	Female	50	Multiple sclerosis (secondary progressive MS)		Brain: Medulla	IHC
MS2	MS	TREM WT/WT	Male	35	Multiple sclerosis (primary progressive MS)		Brain: Frontal Lobe White Matter	IHC
CTRL3	Unaffectected	TREM WT/WT	Female	44	None		Brain: Frontal Lobe White Matter, Basal Ganglia	IHC
CTRL4	Unaffectected	TREM WT/WT	Male	50	None		Brain: Frontal Lobe White Matter, Basal Ganglia	IHC
CTRL5	Unaffectected	TREM WT/WT	Female	46	None		Brain: Frontal Lobe White Matter, Basal Ganglia	IHC

## Sheet: Table S2
Supplemental Table 2: Differential gene expression between NHD and SB CTRL iMGLs
Gene Name	Gene ID	base Mean	log2 Fold Change	lfcSE	stat	P value	Adjusted P value
GLUL	ENSG00000135821.18	4995.15	-1.48014	0.0362205	-40.8646	0	0
PLEC	ENSG00000178209.15	6342.67	1.88824	0.0605135	31.2037	9.5e-214	4.93e-210
HLA-C	ENSG00000204525.16	2594.59	1.053	0.0451807	23.3064	3.82e-120	1.19e-116
APBB3	ENSG00000113108.19	601.536	1.39958	0.0722928	19.3599	1.68e-83	4.36e-80
ARHGEF12	ENSG00000196914.9	661.253	-1.5574	0.0808786	-19.256	1.26e-82	2.8e-79
HLA-A	ENSG00000206503.13	2498.14	0.830714	0.0431721	19.2419	1.65e-82	3.21e-79
DST	ENSG00000151914.20	3362.42	0.881459	0.0487653	18.0756	4.97e-73	8.59e-70
SPTBN1	ENSG00000115306.16	1708.44	1.10116	0.0629408	17.4952	1.56e-68	2.43e-65
PGA5	ENSG00000256713.7	306.96	2.65797	0.155091	17.1382	7.71e-66	1.09e-62
CDH1	ENSG00000039068.19	100.764	-3.41323	0.204658	-16.6777	1.9e-62	2.47e-59
RPS26	ENSG00000197728.11	1937.57	1.00414	0.0614205	16.3486	4.45e-60	5.33e-57
ARHGAP15	ENSG00000075884.14	141.974	2.62965	0.170279	15.4432	8.39e-54	8.74e-51
TENM4	ENSG00000149256.16	145.965	3.56707	0.230985	15.4429	8.43e-54	8.74e-51
TPBG	ENSG00000146242.8	100.15	4.29574	0.295246	14.5497	5.87e-48	5.71e-45
SPP1	ENSG00000118785.14	32453.4	-0.633252	0.0439782	-14.3992	5.23e-47	4.79e-44
PGA3	ENSG00000229859.10	264.846	7.0606	0.493383	14.3106	1.88e-46	1.63e-43
CD163L1	ENSG00000177675.8	634.81	1.5036	0.107159	14.0315	1e-44	8.2e-42
TREM2	ENSG00000095970.17	2381.89	-1.37674	0.102547	-13.4255	4.29e-41	3.34e-38
PLAU	ENSG00000122861.16	279.462	-1.32009	0.0986986	-13.3749	8.47e-41	6.28e-38
GLO1	ENSG00000124767.7	3666.84	1.00199	0.0750585	13.3495	1.19e-40	8.44e-38
ZDBF2	ENSG00000204186.10	780.612	-1.01807	0.0772806	-13.1737	1.24e-39	8.42e-37
NAPRT	ENSG00000147813.16	520.755	-0.967274	0.0756449	-12.787	1.94e-37	1.26e-34
LIMA1	ENSG00000050405.13	603.57	1.16193	0.0917228	12.6679	8.91e-37	5.55e-34
EMC10	ENSG00000161671.16	1277.82	-1.0041	0.0807251	-12.4384	1.62e-35	9.68e-33
SUSD1	ENSG00000106868.16	798.023	0.933435	0.0760835	12.2686	1.34e-34	7.7e-32
H3C7	ENSG00000277775.1	881.197	1.11689	0.0911033	12.2596	1.49e-34	8.3e-32
SLC25A5	ENSG00000005022.6	5166.39	-0.472531	0.0390586	-12.098	1.08e-33	5.81e-31
SSR4	ENSG00000180879.14	1564.32	-0.627127	0.0519643	-12.0684	1.55e-33	8.05e-31
CADM1	ENSG00000182985.17	543.702	-0.967949	0.0811572	-11.9268	8.58e-33	4.17e-30
CD36	ENSG00000135218.19	2672.46	0.87054	0.0735681	11.8331	2.63e-32	1.2e-29
BCAP31	ENSG00000185825.17	2228.34	-0.562855	0.0492758	-11.4225	3.23e-30	1.44e-27
GOLM1	ENSG00000135052.16	351.594	1.105	0.0980847	11.2658	1.94e-29	8.37e-27
H2BC9	ENSG00000275713.2	744.621	1.04479	0.0932936	11.1989	4.13e-29	1.74e-26
ANXA1	ENSG00000135046.14	975.61	0.661501	0.0596526	11.0892	1.42e-28	5.8e-26
DNASE2	ENSG00000105612.9	2942.61	-0.526175	0.0480527	-10.95	6.65e-28	2.65e-25
RFLNB	ENSG00000183688.4	1379.09	0.53759	0.0496355	10.8308	2.46e-27	9.58e-25
CLSTN3	ENSG00000139182.15	289.155	1.56512	0.144751	10.8125	3e-27	1.14e-24
CTSB	ENSG00000164733.21	15489.6	0.3431	0.0323929	10.5918	3.25e-26	1.21e-23
THEM6	ENSG00000130193.8	171.546	1.60768	0.154221	10.4246	1.92e-25	6.93e-23
IL21R	ENSG00000103522.16	402.316	-0.96582	0.0928331	-10.4038	2.38e-25	8.39e-23
C1orf162	ENSG00000143110.11	649.52	0.998995	0.0969761	10.3015	6.94e-25	2.35e-22
GOLGA8B	ENSG00000215252.11	310.457	1.2785	0.124246	10.2901	7.81e-25	2.59e-22
CCL4	ENSG00000275302.2	599.256	-1.06537	0.104165	-10.2277	1.49e-24	4.83e-22
CCL3	ENSG00000277632.2	1474.54	-0.980344	0.0962954	-10.1806	2.42e-24	7.69e-22
SNRPN	ENSG00000128739.22	953.857	-0.718931	0.0714513	-10.0618	8.15e-24	2.54e-21
RGS3	ENSG00000138835.22	358.516	-0.917298	0.0913242	-10.0444	9.72e-24	2.97e-21
F13A1	ENSG00000124491.16	73.0748	5.44731	0.542606	10.0392	1.03e-23	3.07e-21
PILRA	ENSG00000085514.16	735.736	-0.801878	0.0802359	-9.99401	1.62e-23	4.76e-21
PNMA8A	ENSG00000182013.18	77.8195	2.85194	0.288792	9.87539	5.32e-23	1.48e-20
SMARCA1	ENSG00000102038.15	405.303	0.863031	0.0879761	9.80984	1.02e-22	2.74e-20
GPR35	ENSG00000178623.12	381.326	0.974642	0.0997763	9.76828	1.54e-22	4.06e-20
MSR1	ENSG00000038945.15	264.166	1.0414	0.108094	9.63422	5.73e-22	1.49e-19
ASGR2	ENSG00000161944.16	3054.64	0.384128	0.0401226	9.57385	1.03e-21	2.63e-19
APBA1	ENSG00000107282.8	193.291	1.37003	0.144247	9.49785	2.14e-21	5.38e-19
SLC29A1	ENSG00000112759.19	1927.72	0.549058	0.0578845	9.4854	2.41e-21	5.94e-19
S100A9	ENSG00000163220.11	5416.6	0.562489	0.0596443	9.43073	4.07e-21	9.75e-19
ADGRG7	ENSG00000144820.8	215.14	11.1547	1.18321	9.42752	4.2e-21	9.9e-19
SLC15A4	ENSG00000139370.12	419.591	-0.987059	0.105207	-9.38206	6.47e-21	1.5e-18
ZBTB33	ENSG00000177485.7	625.688	-0.856933	0.0922329	-9.29097	1.53e-20	3.5e-18
CD52	ENSG00000169442.9	47.2313	-2.40689	0.264241	-9.10871	8.34e-20	1.88e-17
PIGR	ENSG00000162896.6	4898.9	-0.846502	0.0930078	-9.10141	8.92e-20	1.98e-17
SLC9A7	ENSG00000065923.10	1068.33	-0.528398	0.058318	-9.06063	1.3e-19	2.84e-17
NOTCH2	ENSG00000134250.20	1677.06	-0.468585	0.0521179	-8.99086	2.45e-19	5.3e-17
EFNB1	ENSG00000090776.6	168.467	-1.56424	0.174479	-8.96523	3.1e-19	6.6e-17
CPT1A	ENSG00000110090.13	207.106	2.25277	0.254572	8.84923	8.81e-19	1.85e-16
LPL	ENSG00000175445.17	2832.01	-0.558559	0.0635526	-8.78892	1.51e-18	3.13e-16
AOAH	ENSG00000136250.12	1570.43	0.634722	0.0723243	8.77605	1.69e-18	3.47e-16
FTH1	ENSG00000167996.16	7376.42	-0.442648	0.0510097	-8.67773	4.04e-18	8.16e-16
RENBP	ENSG00000102032.13	669.154	-0.934881	0.108212	-8.63932	5.65e-18	1.13e-15
MNDA	ENSG00000163563.8	221.37	-1.28937	0.149289	-8.63669	5.79e-18	1.14e-15
CD101	ENSG00000134256.12	573.15	0.641835	0.0743649	8.63089	6.09e-18	1.18e-15
NFE2L3	ENSG00000050344.9	102.601	-1.3384	0.155175	-8.62508	6.4e-18	1.23e-15
CD151	ENSG00000177697.19	191.4	-1.97898	0.231235	-8.55829	1.15e-17	2.17e-15
GCNT1	ENSG00000187210.14	134.62	1.33911	0.15781	8.48558	2.15e-17	4.03e-15
CYP4V2	ENSG00000145476.16	557.327	0.657487	0.0776468	8.46766	2.5e-17	4.64e-15
PTPN7	ENSG00000143851.15	553.338	1.62399	0.193361	8.39871	4.51e-17	8.17e-15
EMP1	ENSG00000134531.10	213.938	-1.66523	0.198733	-8.37924	5.33e-17	9.53e-15
IDS	ENSG00000010404.18	778.334	-0.665502	0.0796802	-8.35217	6.7e-17	1.19e-14
AGAP9	ENSG00000204172.12	37.04	3.05805	0.367064	8.33113	8.01e-17	1.4e-14
PCYOX1L	ENSG00000145882.11	495.664	-0.797417	0.0960305	-8.30379	1.01e-16	1.74e-14
SLC35A4	ENSG00000176087.15	1034.71	0.476337	0.0577772	8.24437	1.66e-16	2.84e-14
SRA1	ENSG00000213523.10	1008.54	0.527012	0.0640084	8.23347	1.82e-16	3.08e-14
ATP6V0D2	ENSG00000147614.4	177.123	2.19439	0.269015	8.15715	3.43e-16	5.74e-14
RTL8C	ENSG00000134590.14	398.268	-0.655228	0.08054	-8.13544	4.1e-16	6.8e-14
SP140	ENSG00000079263.19	450.297	-0.751781	0.09262	-8.11683	4.79e-16	7.84e-14
RAB7B	ENSG00000276600.5	239.396	-0.833928	0.102822	-8.11038	5.05e-16	8.18e-14
CENPU	ENSG00000151725.12	345.351	0.994455	0.122728	8.1029	5.37e-16	8.61e-14
FOS	ENSG00000170345.10	2362.78	0.39508	0.0492054	8.0292	9.81e-16	1.56e-13
MYO1G	ENSG00000136286.16	1576.89	0.445995	0.0558655	7.98336	1.42e-15	2.24e-13
UAP1L1	ENSG00000197355.11	738.881	-0.645065	0.0808126	-7.98224	1.44e-15	2.24e-13
PARVB	ENSG00000188677.14	524.351	0.593749	0.0745083	7.9689	1.6e-15	2.47e-13
WSB1	ENSG00000109046.15	2870.46	0.326931	0.0410527	7.9637	1.67e-15	2.55e-13
FCGR1A	ENSG00000150337.13	2321.19	-0.369959	0.0470789	-7.85828	3.89e-15	5.75e-13
PTP4A3	ENSG00000184489.12	92.1014	1.44789	0.184267	7.85754	3.92e-15	5.75e-13
DHTKD1	ENSG00000181192.12	1683.87	0.374268	0.0476771	7.85007	4.16e-15	6.05e-13
ATP5F1A	ENSG00000152234.16	7337.62	0.366018	0.0466391	7.84789	4.23e-15	6.1e-13
MAGED1	ENSG00000179222.17	463.928	-0.669097	0.0855864	-7.8178	5.38e-15	7.68e-13
ADGRG6	ENSG00000112414.15	963.405	0.509644	0.065336	7.80035	6.17e-15	8.74e-13
IRAK1	ENSG00000184216.14	2605.11	-0.465077	0.0597112	-7.78878	6.77e-15	9.49e-13
ZNF618	ENSG00000157657.14	430.481	-0.641623	0.0828767	-7.7419	9.79e-15	1.36e-12
ARHGAP4	ENSG00000089820.15	4664	-0.663942	0.0857744	-7.74056	9.9e-15	1.36e-12
SORL1	ENSG00000137642.13	5210.38	-0.622974	0.0809136	-7.69924	1.37e-14	1.85e-12
INPP5F	ENSG00000198825.15	801.076	-0.446979	0.0580597	-7.6986	1.38e-14	1.85e-12
GDI1	ENSG00000203879.12	872.684	-0.499357	0.0653257	-7.64411	2.1e-14	2.8e-12
SLC7A7	ENSG00000155465.18	3637.52	0.315723	0.041317	7.6415	2.15e-14	2.83e-12
CLEC11A	ENSG00000105472.13	614.935	-0.892338	0.117475	-7.596	3.05e-14	4e-12
EMB	ENSG00000170571.12	509.898	0.754062	0.099657	7.56657	3.83e-14	4.97e-12
FGL1	ENSG00000104760.17	78.9699	1.53784	0.203298	7.56446	3.89e-14	5.01e-12
LNX1	ENSG00000072201.14	19.5477	-3.67953	0.48986	-7.51139	5.85e-14	7.47e-12
CMKLR1	ENSG00000174600.14	5141.12	0.481861	0.0644261	7.47928	7.47e-14	9.38e-12
CCND3	ENSG00000112576.12	1242.04	0.470048	0.0631547	7.44281	9.86e-14	1.23e-11
AATK	ENSG00000181409.14	30.329	3.40619	0.458364	7.43119	1.08e-13	1.33e-11
CALHM2	ENSG00000138172.11	559.018	-0.605546	0.081583	-7.42245	1.15e-13	1.41e-11
LAYN	ENSG00000204381.11	73.3892	2.14122	0.289012	7.40876	1.27e-13	1.55e-11
DNASE1L1	ENSG00000013563.14	611.587	-0.545291	0.0737113	-7.39765	1.39e-13	1.67e-11
C9orf64	ENSG00000165118.15	64.6806	-1.5381	0.208729	-7.36889	1.72e-13	2.06e-11
CCL4L2	ENSG00000276070.5	151.285	-1.1285	0.153944	-7.33062	2.29e-13	2.7e-11
CD99L2	ENSG00000102181.21	877.064	-0.527012	0.0718925	-7.33056	2.29e-13	2.7e-11
S100B	ENSG00000160307.10	2333.7	0.468724	0.0639736	7.32684	2.36e-13	2.74e-11
FP565260.3	ENSG00000277117.5	84.3997	1.88482	0.257256	7.32663	2.36e-13	2.74e-11
ANO10	ENSG00000160746.13	153.847	-0.952292	0.13064	-7.28942	3.11e-13	3.59e-11
CDC42EP3	ENSG00000163171.8	403.504	-0.767748	0.105428	-7.2822	3.28e-13	3.76e-11
SECTM1	ENSG00000141574.8	122.182	1.30175	0.179179	7.26508	3.73e-13	4.21e-11
PSMC4	ENSG00000013275.8	3631.34	0.455107	0.0627624	7.25128	4.13e-13	4.62e-11
ITGB7	ENSG00000139626.16	13517.1	0.408803	0.0563991	7.2484	4.22e-13	4.69e-11
SRGN	ENSG00000122862.5	2385.68	0.431398	0.0595853	7.24001	4.49e-13	4.95e-11
DENND5A	ENSG00000184014.8	912.122	-0.428595	0.0599467	-7.14961	8.7e-13	9.54e-11
RPL39	ENSG00000198918.8	4396.12	-0.546617	0.0765145	-7.14397	9.07e-13	9.87e-11
NCAM1	ENSG00000149294.16	16.5563	-4.05066	0.568145	-7.12962	1.01e-12	1.09e-10
AFAP1	ENSG00000196526.10	43.1666	2.35416	0.330571	7.12148	1.07e-12	1.15e-10
L1TD1	ENSG00000240563.2	8.1367	-6.87489	0.968186	-7.1008	1.24e-12	1.32e-10
AP1G2	ENSG00000213983.12	907.248	-0.51896	0.0730972	-7.0996	1.25e-12	1.33e-10
TYMP	ENSG00000025708.14	856.036	-0.657964	0.092886	-7.08357	1.4e-12	1.48e-10
ASPM	ENSG00000066279.18	948.117	0.585713	0.08282	7.07212	1.53e-12	1.59e-10
DHRS4L2	ENSG00000187630.17	139.768	-0.977226	0.138235	-7.06929	1.56e-12	1.62e-10
ARFGEF3	ENSG00000112379.9	53.7609	7.33479	1.04026	7.05094	1.78e-12	1.82e-10
CCL3L3	ENSG00000276085.1	188.063	-1.39142	0.197426	-7.04782	1.82e-12	1.85e-10
IDH3G	ENSG00000067829.19	706.016	-0.472867	0.0671596	-7.04094	1.91e-12	1.93e-10
YWHAH	ENSG00000128245.15	6128.64	0.346377	0.0494188	7.00901	2.4e-12	2.41e-10
NDST1	ENSG00000070614.15	1214.33	-0.442424	0.0632625	-6.99347	2.68e-12	2.68e-10
CSTA	ENSG00000121552.4	103.134	1.23921	0.177627	6.97646	3.03e-12	3e-10
MYO1D	ENSG00000176658.17	1432.15	-0.477168	0.0684279	-6.97329	3.1e-12	3.05e-10
ROBO1	ENSG00000169855.20	896.498	0.480169	0.0689752	6.96148	3.37e-12	3.3e-10
TFE3	ENSG00000068323.17	1329	-0.483948	0.0700901	-6.90465	5.03e-12	4.84e-10
MYO1E	ENSG00000157483.9	1015.77	-0.461965	0.0669385	-6.90134	5.15e-12	4.92e-10
HLA-DQB2	ENSG00000232629.9	24.169	4.60176	0.669156	6.87696	6.11e-12	5.77e-10
LAMP2	ENSG00000005893.16	2694.23	-0.794581	0.115603	-6.87334	6.27e-12	5.88e-10
PSD3	ENSG00000156011.17	248.379	-1.06606	0.15567	-6.8482	7.48e-12	6.97e-10
TNFRSF10B	ENSG00000120889.13	1222.81	-0.474077	0.0696614	-6.80545	1.01e-11	9.33e-10
PARP10	ENSG00000178685.14	307.753	-0.642401	0.0948351	-6.77387	1.25e-11	1.15e-09
TRIB1	ENSG00000173334.4	680.801	0.453728	0.0671837	6.75355	1.44e-11	1.31e-09
MID1IP1	ENSG00000165175.15	672.907	-0.707153	0.104709	-6.7535	1.44e-11	1.31e-09
GSTM1	ENSG00000134184.13	267.899	-0.723677	0.107176	-6.75225	1.46e-11	1.32e-09
PDHA1	ENSG00000131828.14	868.674	-0.37127	0.0549901	-6.75158	1.46e-11	1.32e-09
CLCN5	ENSG00000171365.17	662.234	-0.493125	0.0731534	-6.74097	1.57e-11	1.41e-09
NPIPB5	ENSG00000243716.10	116.692	1.18793	0.176336	6.73674	1.62e-11	1.44e-09
MYOF	ENSG00000138119.17	1530.11	-0.54068	0.0803002	-6.73323	1.66e-11	1.47e-09
STK32C	ENSG00000165752.17	315.709	0.682983	0.101581	6.72356	1.77e-11	1.56e-09
RHOB	ENSG00000143878.10	389.283	-0.716002	0.106655	-6.71323	1.9e-11	1.66e-09
SLIT3	ENSG00000184347.14	77.5648	-1.63248	0.243208	-6.7123	1.92e-11	1.67e-09
ENPP1	ENSG00000197594.13	88.3641	-1.3343	0.198921	-6.70769	1.98e-11	1.71e-09
COL23A1	ENSG00000050767.17	33.9617	4.78873	0.713984	6.70706	1.99e-11	1.71e-09
SLC7A8	ENSG00000092068.20	318.835	0.813681	0.121525	6.69559	2.15e-11	1.84e-09
PFKFB2	ENSG00000123836.15	902.33	-0.429099	0.0641813	-6.68573	2.3e-11	1.95e-09
AHNAK	ENSG00000124942.14	41.2697	-1.59538	0.239346	-6.66557	2.64e-11	2.23e-09
CUL4B	ENSG00000158290.17	656.16	-0.609388	0.0917152	-6.64435	3.05e-11	2.56e-09
TP53INP1	ENSG00000164938.14	1047.8	-0.441516	0.0665888	-6.63048	3.35e-11	2.8e-09
STK32B	ENSG00000152953.13	33.5991	-1.8185	0.274362	-6.62811	3.4e-11	2.83e-09
SLC45A3	ENSG00000158715.6	59.045	-1.43665	0.21687	-6.62447	3.48e-11	2.89e-09
FNBP1	ENSG00000187239.17	1231.92	0.346473	0.0523196	6.62224	3.54e-11	2.91e-09
CD47	ENSG00000196776.16	863.618	-0.512612	0.0774203	-6.62116	3.56e-11	2.92e-09
GAB3	ENSG00000160219.12	978.537	-0.391961	0.0592261	-6.61805	3.64e-11	2.97e-09
CASP4	ENSG00000196954.14	424.394	0.550458	0.0833804	6.60176	4.06e-11	3.28e-09
NEO1	ENSG00000067141.17	45.202	-1.49403	0.227391	-6.57032	5.02e-11	4.01e-09
ATP10A	ENSG00000206190.12	681.671	0.565956	0.0864996	6.54288	6.03e-11	4.79e-09
MKNK1	ENSG00000079277.21	2683.14	0.290835	0.0446016	6.52072	7e-11	5.5e-09
KCNK17	ENSG00000124780.14	649.153	-0.823508	0.126312	-6.51965	7.05e-11	5.51e-09
TMIGD3	ENSG00000121933.19	1193.07	0.521526	0.0800743	6.51302	7.37e-11	5.7e-09
GRIPAP1	ENSG00000068400.13	640.191	-0.476491	0.0731607	-6.51293	7.37e-11	5.7e-09
OTUD5	ENSG00000068308.13	403.048	-0.570147	0.0875497	-6.51227	7.4e-11	5.7e-09
CD44	ENSG00000026508.19	254.662	-1.01775	0.156673	-6.49603	8.25e-11	6.32e-09
CBX6	ENSG00000183741.12	831.23	-0.469915	0.0725483	-6.47728	9.34e-11	7.13e-09
TGFBI	ENSG00000120708.17	16030.1	0.38352	0.0593542	6.46156	1.04e-10	7.87e-09
CXCL12	ENSG00000107562.16	45.0341	1.75651	0.272334	6.44986	1.12e-10	8.46e-09
MAP3K12	ENSG00000139625.13	143.765	-0.878742	0.136333	-6.44553	1.15e-10	8.66e-09
SH3BGRL	ENSG00000131171.13	2160.74	-0.636205	0.0987145	-6.4449	1.16e-10	8.66e-09
NPIPB15	ENSG00000196436.8	27.319	8.18377	1.27348	6.42632	1.31e-10	9.74e-09
DSTYK	ENSG00000133059.17	140.993	-1.168	0.182093	-6.41429	1.41e-10	1.05e-08
CD1A	ENSG00000158477.7	94.6747	-1.27429	0.199012	-6.40308	1.52e-10	1.12e-08
AHRR	ENSG00000286169.1	604.952	0.509879	0.0796858	6.39862	1.57e-10	1.15e-08
FXYD5	ENSG00000089327.15	1022.12	0.866314	0.135553	6.39097	1.65e-10	1.2e-08
APMAP	ENSG00000101474.12	2051.59	0.610945	0.0957588	6.38004	1.77e-10	1.29e-08
SAMD9	ENSG00000205413.8	281.203	-0.740485	0.116224	-6.37119	1.88e-10	1.36e-08
STT3A	ENSG00000134910.14	1770.6	0.315305	0.0495223	6.36693	1.93e-10	1.39e-08
CALCOCO2	ENSG00000136436.14	817.662	0.669943	0.105527	6.34855	2.17e-10	1.56e-08
VAMP7	ENSG00000124333.16	562.543	-0.701525	0.11064	-6.34062	2.29e-10	1.63e-08
TNFAIP8L1	ENSG00000185361.9	706.927	-0.53074	0.0837998	-6.33343	2.4e-10	1.7e-08
FSCN1	ENSG00000075618.18	3866.93	0.422622	0.0670441	6.30364	2.91e-10	2.05e-08
SFMBT2	ENSG00000198879.12	4939.33	0.298192	0.0473733	6.29452	3.08e-10	2.16e-08
PHF6	ENSG00000156531.16	598.039	-0.52546	0.0838864	-6.26394	3.75e-10	2.62e-08
FAM3A	ENSG00000071889.16	270.501	-0.916847	0.146897	-6.24143	4.34e-10	3.01e-08
TMEM154	ENSG00000170006.12	449.592	-0.72752	0.116634	-6.23763	4.44e-10	3.07e-08
DYNLT3	ENSG00000165169.11	224.443	-0.679599	0.109012	-6.23417	4.54e-10	3.13e-08
MAN1A1	ENSG00000111885.7	79.5736	-1.27568	0.204674	-6.23275	4.58e-10	3.14e-08
SIRPB2	ENSG00000196209.13	589.668	0.559095	0.0899737	6.21398	5.17e-10	3.53e-08
BEX4	ENSG00000102409.10	646.105	-0.540109	0.0870399	-6.20531	5.46e-10	3.69e-08
NFKBIA	ENSG00000100906.10	2066.93	-0.600666	0.0967989	-6.2053	5.46e-10	3.69e-08
HCCS	ENSG00000004961.15	290.169	-0.609561	0.0983169	-6.19996	5.65e-10	3.81e-08
GPR160	ENSG00000173890.17	670.184	0.903247	0.145801	6.19506	5.83e-10	3.91e-08
STK24	ENSG00000102572.14	1105.83	0.389263	0.0630209	6.17673	6.54e-10	4.37e-08
MORF4L2	ENSG00000123562.17	1277.55	-0.348692	0.0565358	-6.16762	6.93e-10	4.6e-08
DBI	ENSG00000155368.16	1370.16	-0.38168	0.0619657	-6.15953	7.3e-10	4.81e-08
TROAP	ENSG00000135451.13	205.324	0.942204	0.153184	6.1508	7.71e-10	5.04e-08
CSF2RB	ENSG00000100368.14	1063.08	-0.372366	0.0607878	-6.12566	9.03e-10	5.88e-08
NDUFB11	ENSG00000147123.10	929.66	-0.452511	0.0739718	-6.11734	9.52e-10	6.17e-08
TRIM14	ENSG00000106785.15	178.267	0.778838	0.127725	6.09778	1.08e-09	6.95e-08
HAUS7	ENSG00000213397.10	233.083	-0.595514	0.0979187	-6.08172	1.19e-09	7.61e-08
PTPN14	ENSG00000152104.12	305.896	-0.53344	0.087719	-6.08123	1.19e-09	7.61e-08
SPATA13	ENSG00000182957.16	670.183	0.404179	0.0664927	6.07854	1.21e-09	7.71e-08
LRP6	ENSG00000070018.9	195.792	0.81681	0.134644	6.06646	1.31e-09	8.27e-08
KIF26B	ENSG00000162849.16	85.7553	-1.43182	0.236193	-6.06208	1.34e-09	8.47e-08
ITIH4	ENSG00000055955.17	34.1972	-1.69225	0.279187	-6.06134	1.35e-09	8.47e-08
STN1	ENSG00000107960.11	447.141	0.523754	0.0867533	6.03728	1.57e-09	9.8e-08
HNRNPH2	ENSG00000126945.9	1275.81	-0.4151	0.0688036	-6.03311	1.61e-09	1e-07
CD244	ENSG00000122223.13	325.268	0.608068	0.101029	6.01878	1.76e-09	1.09e-07
ATP6AP2	ENSG00000182220.15	5650.43	-0.63303	0.106122	-5.96509	2.44e-09	1.51e-07
SLC38A1	ENSG00000111371.16	351.839	0.668221	0.112137	5.95896	2.54e-09	1.56e-07
NLRP12	ENSG00000142405.21	18.9398	-2.87645	0.482753	-5.95843	2.55e-09	1.56e-07
ARHGAP9	ENSG00000123329.19	3235.78	0.323915	0.0543833	5.95614	2.58e-09	1.58e-07
BAZ1A	ENSG00000198604.11	1028.42	0.340318	0.0572204	5.9475	2.72e-09	1.66e-07
TRPM4	ENSG00000130529.16	271.635	-0.858006	0.144295	-5.94619	2.74e-09	1.66e-07
PDPR	ENSG00000090857.13	1025.97	0.341481	0.0574416	5.94484	2.77e-09	1.67e-07
DAB2	ENSG00000153071.15	4021.11	0.520434	0.0876267	5.93922	2.86e-09	1.72e-07
AK1	ENSG00000106992.19	113.849	1.03835	0.175082	5.93067	3.02e-09	1.81e-07
GALNT10	ENSG00000164574.16	1556.21	0.32266	0.0544135	5.92978	3.03e-09	1.81e-07
ATP6AP1	ENSG00000071553.17	3244.16	-0.507024	0.0855282	-5.92815	3.06e-09	1.82e-07
TNFRSF11B	ENSG00000164761.9	12.3782	-3.09659	0.523629	-5.9137	3.35e-09	1.98e-07
ARHGEF40	ENSG00000165801.10	2521.57	-0.279157	0.047215	-5.91247	3.37e-09	1.99e-07
WDR45	ENSG00000196998.19	406.291	-0.504002	0.0855092	-5.89412	3.77e-09	2.2e-07
PYCR1	ENSG00000183010.17	278.325	0.595354	0.101169	5.88477	3.99e-09	2.32e-07
PLAC8	ENSG00000145287.10	2658.26	0.264452	0.0449742	5.88008	4.1e-09	2.38e-07
GRAMD2B	ENSG00000155324.10	265.359	0.655355	0.111617	5.87146	4.32e-09	2.5e-07
ZMAT3	ENSG00000172667.11	1127.41	-0.675697	0.115187	-5.86609	4.46e-09	2.57e-07
MAGED2	ENSG00000102316.17	1053.49	-0.490888	0.0837166	-5.86369	4.53e-09	2.6e-07
CDK18	ENSG00000117266.15	33.839	-1.45193	0.247874	-5.85754	4.7e-09	2.69e-07
CHN2	ENSG00000106069.22	50.1177	-1.62837	0.278023	-5.85697	4.71e-09	2.69e-07
TRAF3	ENSG00000131323.15	376.273	-0.509332	0.0870149	-5.85339	4.82e-09	2.74e-07
SLC36A1	ENSG00000123643.13	660.909	0.756217	0.129218	5.85227	4.85e-09	2.74e-07
FAM20A	ENSG00000108950.12	29.3357	-1.72601	0.29596	-5.8319	5.48e-09	3.09e-07
LDHA	ENSG00000134333.14	2367.25	0.275902	0.0473254	5.8299	5.55e-09	3.12e-07
DDX59	ENSG00000118197.14	214.188	0.687355	0.11802	5.82407	5.74e-09	3.21e-07
CHI3L1	ENSG00000133048.13	2295.2	-1.47617	0.253481	-5.8236	5.76e-09	3.21e-07
NBL1	ENSG00000158747.14	39.0626	1.56703	0.269192	5.82124	5.84e-09	3.25e-07
PLXDC2	ENSG00000120594.17	13023.5	-0.276793	0.0475829	-5.81707	5.99e-09	3.32e-07
GANC	ENSG00000214013.9	509.041	0.499728	0.0862138	5.79638	6.78e-09	3.74e-07
RPS4Y1	ENSG00000129824.16	563.687	19.8597	3.43421	5.78291	7.34e-09	4.04e-07
SLC11A2	ENSG00000110911.16	1373.59	-0.463061	0.0801027	-5.78084	7.43e-09	4.07e-07
STAG2	ENSG00000101972.18	2294.09	-0.538019	0.093105	-5.77863	7.53e-09	4.11e-07
SLC9A6	ENSG00000198689.11	609.115	-0.521369	0.0903031	-5.77354	7.76e-09	4.23e-07
SMC1A	ENSG00000072501.18	2782.76	-0.256161	0.0443906	-5.7706	7.9e-09	4.28e-07
SLC15A3	ENSG00000110446.11	1550.9	-0.392016	0.0680095	-5.76414	8.21e-09	4.44e-07
ARF3	ENSG00000134287.10	3743.15	0.238365	0.0414181	5.7551	8.66e-09	4.66e-07
KDM5D	ENSG00000012817.15	466.494	19.7234	3.43423	5.74319	9.29e-09	4.99e-07
H1-3	ENSG00000124575.6	1210.92	0.328979	0.0572971	5.74162	9.38e-09	5.02e-07
NCF4	ENSG00000100365.16	4371.91	0.221502	0.038628	5.73424	9.79e-09	5.22e-07
ROR2	ENSG00000169071.15	198.43	1.02433	0.178922	5.725	1.03e-08	5.5e-07
FKBP1B	ENSG00000119782.14	108.614	0.856376	0.149626	5.72343	1.04e-08	5.53e-07
SYNE2	ENSG00000054654.17	209.024	-1.42176	0.248656	-5.71778	1.08e-08	5.7e-07
SASH3	ENSG00000122122.10	5328.14	-0.25397	0.0444745	-5.71048	1.13e-08	5.92e-07
USP9Y	ENSG00000114374.13	373.546	19.5633	3.43425	5.69654	1.22e-08	6.41e-07
AIG1	ENSG00000146416.19	203.363	0.661028	0.116154	5.69095	1.26e-08	6.6e-07
DDX3Y	ENSG00000067048.17	355.576	19.5278	3.43425	5.68618	1.3e-08	6.76e-07
SEPTIN3	ENSG00000100167.20	143.522	0.929632	0.163527	5.68487	1.31e-08	6.79e-07
ADGRD1	ENSG00000111452.13	138.769	-0.948207	0.166844	-5.68319	1.32e-08	6.84e-07
DDX43	ENSG00000080007.8	4.73304	-6.09684	1.07419	-5.67577	1.38e-08	7.12e-07
NUAK2	ENSG00000163545.10	41.3968	-1.30785	0.230467	-5.67476	1.39e-08	7.14e-07
MARCKSL1	ENSG00000175130.7	740.094	0.473828	0.0836608	5.66368	1.48e-08	7.59e-07
FN1	ENSG00000115414.20	207.001	-0.813621	0.14392	-5.65327	1.57e-08	8.03e-07
S100A8	ENSG00000143546.10	529.226	0.971723	0.17209	5.64661	1.64e-08	8.32e-07
ADGRG1	ENSG00000205336.12	2232.57	0.41373	0.0732939	5.64481	1.65e-08	8.39e-07
RP2	ENSG00000102218.6	1161.94	-0.347657	0.0616157	-5.64235	1.68e-08	8.48e-07
GRK5	ENSG00000198873.12	75.5301	1.00183	0.177824	5.63385	1.76e-08	8.88e-07
TNFRSF9	ENSG00000049249.8	67.4889	-1.49314	0.265274	-5.62868	1.82e-08	9.12e-07
DENND3	ENSG00000105339.10	4659.11	0.339003	0.0602584	5.62583	1.85e-08	9.21e-07
C15orf48	ENSG00000166920.12	37.212	-1.33096	0.236761	-5.62154	1.89e-08	9.41e-07
MPG	ENSG00000103152.11	300.519	-0.573361	0.102089	-5.61631	1.95e-08	9.67e-07
EBI3	ENSG00000105246.6	146.272	-0.761762	0.135861	-5.60692	2.06e-08	1.02e-06
CD300E	ENSG00000186407.7	99.3871	-1.04218	0.186073	-5.60091	2.13e-08	1.05e-06
USP7	ENSG00000187555.16	1725.75	0.328483	0.0587405	5.5921	2.24e-08	1.1e-06
FAS	ENSG00000026103.22	76.7981	-1.26395	0.226358	-5.58383	2.35e-08	1.15e-06
VMA21	ENSG00000160131.13	702.576	-0.466847	0.0837482	-5.57442	2.48e-08	1.21e-06
CDKN1A	ENSG00000124762.13	2034.88	-0.418205	0.0750505	-5.57232	2.51e-08	1.22e-06
IDH1	ENSG00000138413.13	3030.18	0.212796	0.0382317	5.56596	2.61e-08	1.26e-06
TMEM220	ENSG00000187824.8	40.1581	2.32912	0.418926	5.55973	2.7e-08	1.3e-06
STEAP3	ENSG00000115107.20	52.736	-1.63143	0.293842	-5.55206	2.82e-08	1.36e-06
B4GALT1	ENSG00000086062.12	825.745	-0.446457	0.0805026	-5.54587	2.92e-08	1.4e-06
QPCT	ENSG00000115828.17	75.1956	-1.21315	0.218769	-5.54532	2.93e-08	1.4e-06
CD82	ENSG00000085117.12	183.138	-0.707244	0.127753	-5.53604	3.09e-08	1.47e-06
CDCP1	ENSG00000163814.8	58.4863	-1.24149	0.224348	-5.53377	3.13e-08	1.49e-06
SDC3	ENSG00000162512.16	70.0686	1.54376	0.279708	5.51918	3.41e-08	1.61e-06
ZNF626	ENSG00000188171.16	17.9393	-2.42617	0.441189	-5.49915	3.82e-08	1.8e-06
TCEAL8	ENSG00000180964.17	377.855	-0.527434	0.0960169	-5.49314	3.95e-08	1.86e-06
KIF20A	ENSG00000112984.12	411.693	0.965744	0.175849	5.49191	3.98e-08	1.86e-06
UTY	ENSG00000183878.15	134.204	18.8255	3.43443	5.48142	4.22e-08	1.97e-06
ZFP57	ENSG00000204644.9	11.634	6.95214	1.27003	5.47401	4.4e-08	2.05e-06
CDC25B	ENSG00000101224.17	279.92	0.649634	0.118801	5.46826	4.54e-08	2.11e-06
DLST	ENSG00000119689.15	914.295	-0.328771	0.060193	-5.46195	4.71e-08	2.18e-06
FAM160A1	ENSG00000164142.16	132.595	-0.883699	0.162264	-5.44605	5.15e-08	2.38e-06
BMP10	ENSG00000163217.2	7.61676	-4.86749	0.894326	-5.44263	5.25e-08	2.42e-06
SYNE1	ENSG00000131018.24	436.767	-0.562563	0.103371	-5.44218	5.26e-08	2.42e-06
RGS6	ENSG00000182732.18	80.3224	1.6874	0.310596	5.43277	5.55e-08	2.53e-06
HLA-DQA1	ENSG00000196735.13	821.291	-2.15564	0.396992	-5.42994	5.64e-08	2.57e-06
MYO1B	ENSG00000128641.19	30.058	-1.52029	0.28007	-5.42824	5.69e-08	2.58e-06
HMGB2	ENSG00000164104.12	1316.74	0.455434	0.0839855	5.42277	5.87e-08	2.65e-06
AIFM1	ENSG00000156709.14	641.265	-0.410425	0.0756976	-5.42191	5.9e-08	2.65e-06
DGKD	ENSG00000077044.10	747.915	0.378807	0.069869	5.42168	5.9e-08	2.65e-06
SQSTM1	ENSG00000161011.20	1984.24	-0.290034	0.05357	-5.41412	6.16e-08	2.75e-06
EEF2	ENSG00000167658.16	18991.9	-0.226087	0.0417688	-5.41282	6.2e-08	2.76e-06
CIB1	ENSG00000185043.12	484.302	-0.419738	0.0776462	-5.40578	6.45e-08	2.86e-06
LDB1	ENSG00000198728.11	1137.23	-0.32002	0.0592506	-5.40113	6.62e-08	2.93e-06
SLC6A12	ENSG00000111181.12	44.8933	-1.89861	0.351567	-5.40041	6.65e-08	2.93e-06
MAP3K20	ENSG00000091436.17	98.4231	-0.808491	0.149757	-5.39868	6.71e-08	2.95e-06
CYB561A3	ENSG00000162144.9	2557.87	-0.532282	0.0986995	-5.39295	6.93e-08	3.02e-06
LRMDA	ENSG00000148655.15	104.631	-1.00649	0.186722	-5.39031	7.03e-08	3.06e-06
STMN1	ENSG00000117632.23	2905.62	0.484967	0.0902117	5.37588	7.62e-08	3.3e-06
CLNK	ENSG00000109684.15	132.131	-0.734315	0.136633	-5.37436	7.69e-08	3.32e-06
TMOD2	ENSG00000128872.10	564.173	-0.673923	0.125468	-5.37127	7.82e-08	3.37e-06
C12orf75	ENSG00000235162.8	1360.82	0.337435	0.0630453	5.35226	8.69e-08	3.71e-06
CARD9	ENSG00000187796.15	2395.23	0.418581	0.078208	5.35216	8.69e-08	3.71e-06
G6PD	ENSG00000160211.19	495.869	-0.476374	0.0890328	-5.35054	8.77e-08	3.73e-06
CCNB2	ENSG00000157456.8	430.543	0.730238	0.136531	5.3485	8.87e-08	3.76e-06
CPVL	ENSG00000106066.15	970.346	-1.3342	0.249775	-5.34162	9.21e-08	3.9e-06
FLNA	ENSG00000196924.18	4311.52	-1.29624	0.24277	-5.33935	9.33e-08	3.94e-06
GSDMA	ENSG00000167914.12	17.201	6.5323	1.22599	5.32821	9.92e-08	4.17e-06
RETN	ENSG00000104918.8	281.953	0.793834	0.149169	5.32172	1.03e-07	4.31e-06
NUTM2A	ENSG00000184923.12	32.9282	-1.77027	0.332798	-5.31934	1.04e-07	4.36e-06
FAR2	ENSG00000064763.11	295.182	0.790284	0.148693	5.31486	1.07e-07	4.45e-06
XIAP	ENSG00000101966.12	710.625	-0.412934	0.0777452	-5.31137	1.09e-07	4.53e-06
CCNQ	ENSG00000262919.8	235.106	-0.750449	0.141323	-5.31016	1.1e-07	4.55e-06
ZNF75D	ENSG00000186376.15	324.574	-0.559473	0.105559	-5.30009	1.16e-07	4.79e-06
JOSD2	ENSG00000161677.11	84.7142	-0.967333	0.182661	-5.29578	1.19e-07	4.89e-06
MMRN2	ENSG00000173269.14	108.404	1.46096	0.276634	5.28119	1.28e-07	5.29e-06
CUX1	ENSG00000257923.11	1003.93	-0.324817	0.0615192	-5.27993	1.29e-07	5.31e-06
ARMCX3	ENSG00000102401.20	412.873	-0.458541	0.0868764	-5.27808	1.31e-07	5.35e-06
ARAP1	ENSG00000186635.14	3725.31	-0.256688	0.0486577	-5.27539	1.32e-07	5.41e-06
ENC1	ENSG00000171617.14	168.317	-0.647702	0.122945	-5.26821	1.38e-07	5.61e-06
IL10RA	ENSG00000110324.10	2562.21	-0.381175	0.0723996	-5.26487	1.4e-07	5.7e-06
DPYD	ENSG00000188641.14	2304.37	0.292348	0.0555755	5.26038	1.44e-07	5.83e-06
TRAF3IP3	ENSG00000009790.15	802.649	-0.415933	0.0790853	-5.2593	1.45e-07	5.85e-06
SLC35A2	ENSG00000102100.16	230.637	-0.547257	0.104298	-5.24707	1.55e-07	6.2e-06
NISCH	ENSG00000010322.16	2705.86	0.288657	0.0550138	5.24698	1.55e-07	6.2e-06
ZSCAN18	ENSG00000121413.12	12.4329	-2.75536	0.525248	-5.24583	1.56e-07	6.23e-06
POTEF	ENSG00000196604.13	26.3911	5.01131	0.95613	5.24124	1.59e-07	6.37e-06
HEG1	ENSG00000173706.14	422.231	0.480962	0.0919378	5.23138	1.68e-07	6.68e-06
GK	ENSG00000198814.12	188.624	-0.779202	0.148948	-5.23138	1.68e-07	6.68e-06
RTL8B	ENSG00000212747.5	63.4247	-1.22078	0.233391	-5.23061	1.69e-07	6.69e-06
ITGAX	ENSG00000140678.16	1119.73	-0.446869	0.0854637	-5.22876	1.71e-07	6.74e-06
PAQR8	ENSG00000170915.9	627.464	-0.464011	0.089118	-5.20671	1.92e-07	7.56e-06
MMGT1	ENSG00000169446.5	326.868	-0.628315	0.120977	-5.19365	2.06e-07	8.07e-06
PCDHGA10	ENSG00000253846.2	116.703	1.0633	0.204916	5.18895	2.11e-07	8.25e-06
EZR	ENSG00000092820.18	2269.92	0.305263	0.0588883	5.18376	2.17e-07	8.46e-06
FOSB	ENSG00000125740.14	71.4311	1.0393	0.200549	5.1823	2.19e-07	8.51e-06
AC068831.8	ENSG00000284946.1	294.657	0.51741	0.100077	5.17014	2.34e-07	9.06e-06
FRY	ENSG00000073910.22	111.664	1.11696	0.216131	5.16797	2.37e-07	9.14e-06
CLPB	ENSG00000162129.14	883.011	-0.303706	0.0589097	-5.15546	2.53e-07	9.75e-06
PBXIP1	ENSG00000163346.17	1227.09	-0.486798	0.0945577	-5.14815	2.63e-07	1.01e-05
TANC2	ENSG00000170921.15	934.934	-0.356184	0.0693721	-5.13439	2.83e-07	1.09e-05
MFSD13A	ENSG00000138111.14	93.1819	-0.961122	0.187401	-5.12869	2.92e-07	1.12e-05
SOD2	ENSG00000112096.18	2777.47	-0.373634	0.0728857	-5.1263	2.95e-07	1.13e-05
PDE3B	ENSG00000152270.9	149.602	-0.943573	0.18415	-5.12393	2.99e-07	1.14e-05
FUNDC2	ENSG00000165775.18	727.41	-0.31718	0.0620031	-5.11555	3.13e-07	1.19e-05
C1orf61	ENSG00000125462.18	21.1145	-1.66487	0.325548	-5.11406	3.15e-07	1.19e-05
IKBKG	ENSG00000269335.5	416.227	-0.520447	0.102039	-5.10047	3.39e-07	1.28e-05
ATXN7L3B	ENSG00000253719.4	955.533	-0.277966	0.054501	-5.10019	3.39e-07	1.28e-05
PTCRA	ENSG00000171611.9	46.0503	-1.48659	0.291612	-5.09784	3.44e-07	1.29e-05
MTSS1	ENSG00000170873.18	58.3717	1.77021	0.347948	5.08756	3.63e-07	1.36e-05
DAPK1	ENSG00000196730.13	1545.53	-0.313876	0.0617492	-5.08308	3.71e-07	1.39e-05
TPM3	ENSG00000143549.21	4999.13	0.281107	0.0553177	5.08168	3.74e-07	1.39e-05
RALGAPA2	ENSG00000188559.15	2033.46	-0.253791	0.0499515	-5.08075	3.76e-07	1.4e-05
SFT2D2	ENSG00000213064.10	2044.79	-0.45681	0.0899995	-5.07569	3.86e-07	1.43e-05
ATP13A3	ENSG00000133657.15	4438.1	0.303996	0.0599274	5.07275	3.92e-07	1.45e-05
PIK3IP1	ENSG00000100100.13	178.902	-0.650722	0.128328	-5.07075	3.96e-07	1.46e-05
HAUS4	ENSG00000092036.18	1370.63	0.311102	0.0613759	5.0688	4e-07	1.47e-05
ABRACL	ENSG00000146386.8	394.318	-0.436421	0.0861014	-5.06868	4.01e-07	1.47e-05
RGS18	ENSG00000150681.10	379.042	0.492155	0.0970984	5.06863	4.01e-07	1.47e-05
PDE1B	ENSG00000123360.12	481.89	0.441369	0.0871055	5.06707	4.04e-07	1.48e-05
PCNX1	ENSG00000100731.16	1579.76	0.383395	0.0757139	5.06373	4.11e-07	1.5e-05
PQBP1	ENSG00000102103.16	567.284	-0.405804	0.0801538	-5.06282	4.13e-07	1.5e-05
RHOBTB2	ENSG00000008853.16	1319.22	-0.418854	0.0828797	-5.05376	4.33e-07	1.57e-05
ACVRL1	ENSG00000139567.13	227.343	-0.584996	0.115823	-5.05079	4.4e-07	1.59e-05
RASA3	ENSG00000185989.11	1060.68	0.423194	0.084152	5.02892	4.93e-07	1.77e-05
LRP5	ENSG00000162337.12	106.053	1.30656	0.260061	5.02406	5.06e-07	1.81e-05
MDM4	ENSG00000198625.13	1021.32	0.277955	0.0554086	5.01646	5.26e-07	1.88e-05
EIF4A3	ENSG00000141543.12	954.184	0.323845	0.0645755	5.01498	5.3e-07	1.89e-05
KPNA2	ENSG00000182481.9	2483.02	0.475012	0.0948872	5.00607	5.56e-07	1.97e-05
SAT1	ENSG00000130066.16	7405.77	-0.425823	0.0850965	-5.004	5.62e-07	1.99e-05
ZNF608	ENSG00000168916.15	73.4939	0.961437	0.192142	5.00378	5.62e-07	1.99e-05
MOB3B	ENSG00000120162.10	411.415	-0.463009	0.0925577	-5.00238	5.66e-07	2e-05
MRC2	ENSG00000011028.14	4804.12	-0.27268	0.0546372	-4.99075	6.01e-07	2.12e-05
MTCL1	ENSG00000168502.17	112.756	-1.15968	0.232408	-4.98983	6.04e-07	2.12e-05
PA2G4	ENSG00000170515.14	1338.23	0.354717	0.0711122	4.98813	6.1e-07	2.14e-05
RESF1	ENSG00000174718.12	4990.2	-0.436253	0.0876905	-4.97492	6.53e-07	2.28e-05
TMCO6	ENSG00000113119.12	169.058	0.819713	0.164904	4.97085	6.67e-07	2.32e-05
SLC31A1	ENSG00000136868.11	2161.43	-0.230886	0.0464879	-4.96659	6.81e-07	2.37e-05
HSDL2	ENSG00000119471.15	531.379	0.40717	0.0820408	4.96303	6.94e-07	2.41e-05
SLC8A1	ENSG00000183023.18	4759.19	-0.185628	0.0374107	-4.9619	6.98e-07	2.41e-05
PRC1	ENSG00000198901.14	997.683	0.565962	0.114093	4.96053	7.03e-07	2.43e-05
IFITM3	ENSG00000142089.16	96.5734	1.67365	0.337486	4.95916	7.08e-07	2.44e-05
TRIB2	ENSG00000071575.11	105.533	1.00796	0.20327	4.95874	7.1e-07	2.44e-05
INTS1	ENSG00000164880.16	791.824	-0.405295	0.0818101	-4.95409	7.27e-07	2.49e-05
VDAC3	ENSG00000078668.14	1122.31	0.360153	0.0727297	4.95194	7.35e-07	2.51e-05
ULK2	ENSG00000083290.20	556.014	0.388181	0.0784506	4.94809	7.49e-07	2.56e-05
KDM5A	ENSG00000073614.13	2232.36	-0.253796	0.0513679	-4.94075	7.78e-07	2.65e-05
PIK3AP1	ENSG00000155629.15	4212.82	-0.345041	0.0699011	-4.93613	7.97e-07	2.7e-05
PNPO	ENSG00000108439.10	1175.76	-0.278225	0.0563815	-4.93469	8.03e-07	2.72e-05
PEX6	ENSG00000124587.14	210.992	-0.571953	0.116144	-4.92454	8.46e-07	2.85e-05
MCRIP2	ENSG00000172366.20	235.504	-0.569072	0.115589	-4.92326	8.51e-07	2.86e-05
ADAM28	ENSG00000042980.13	3431.18	-0.261349	0.0531018	-4.92167	8.58e-07	2.88e-05
LRATD2	ENSG00000168672.4	437.254	0.496888	0.101041	4.91768	8.76e-07	2.93e-05
MDM2	ENSG00000135679.25	1314.43	-0.361209	0.0736024	-4.90757	9.22e-07	3.08e-05
PTPA	ENSG00000119383.19	1427.54	0.272333	0.0555126	4.90579	9.31e-07	3.1e-05
ATG4C	ENSG00000125703.15	622.705	-0.423014	0.0862495	-4.90454	9.36e-07	3.11e-05
CCNB1	ENSG00000134057.15	602.643	0.905106	0.184577	4.90368	9.41e-07	3.12e-05
EDA2R	ENSG00000131080.15	87.7139	-1.25459	0.25591	-4.90249	9.46e-07	3.13e-05
NBPF14	ENSG00000270629.6	189.866	-0.749124	0.153016	-4.89572	9.79e-07	3.24e-05
HK1	ENSG00000156515.23	2025.15	0.207661	0.0424492	4.89199	9.98e-07	3.29e-05
IFNGR1	ENSG00000027697.14	7112.56	-0.503245	0.102955	-4.88802	1.02e-06	3.35e-05
PLXNA1	ENSG00000114554.11	311.41	-0.690054	0.141313	-4.88315	1.04e-06	3.43e-05
TSPAN13	ENSG00000106537.8	96.3907	1.09686	0.225166	4.87137	1.11e-06	3.63e-05
ECH1	ENSG00000104823.9	509.568	0.4667	0.0958318	4.86999	1.12e-06	3.65e-05
PLAAT3	ENSG00000176485.11	61.3548	-1.80391	0.370447	-4.86954	1.12e-06	3.65e-05
CHST7	ENSG00000147119.4	66.3336	-0.922477	0.189484	-4.86836	1.13e-06	3.66e-05
PHGDH	ENSG00000092621.12	21.0673	2.09234	0.430056	4.86528	1.14e-06	3.71e-05
CTSH	ENSG00000103811.16	5548.72	-0.348965	0.0717737	-4.86201	1.16e-06	3.77e-05
TRANK1	ENSG00000168016.14	154.668	-0.62146	0.127833	-4.8615	1.17e-06	3.77e-05
NINL	ENSG00000101004.15	33.9076	-1.31284	0.270084	-4.86084	1.17e-06	3.78e-05
TOR3A	ENSG00000186283.14	834.206	-0.344831	0.0710673	-4.85217	1.22e-06	3.93e-05
MAP3K3	ENSG00000198909.7	970.6	-0.36485	0.0751952	-4.85203	1.22e-06	3.93e-05
UBE2A	ENSG00000077721.16	617.077	-0.426171	0.0880102	-4.84229	1.28e-06	4.12e-05
MAGEH1	ENSG00000187601.5	126.97	-0.769771	0.159013	-4.84094	1.29e-06	4.14e-05
ZNF334	ENSG00000198185.11	61.2902	-0.9878	0.204207	-4.83725	1.32e-06	4.21e-05
SEC23B	ENSG00000101310.17	1833.1	0.226058	0.0468346	4.82672	1.39e-06	4.42e-05
DPYSL2	ENSG00000092964.18	4818.55	-0.19571	0.0405631	-4.82484	1.4e-06	4.45e-05
UBQLN2	ENSG00000188021.8	312.404	-0.529656	0.109893	-4.81975	1.44e-06	4.55e-05
ZNF77	ENSG00000175691.9	84.1324	0.974354	0.202166	4.81959	1.44e-06	4.55e-05
PRR11	ENSG00000068489.12	379.696	0.538508	0.111854	4.81437	1.48e-06	4.66e-05
RASGEF1B	ENSG00000138670.17	478.157	-0.584683	0.121615	-4.80765	1.53e-06	4.81e-05
CD83	ENSG00000112149.10	1221.09	-1.11361	0.231979	-4.80048	1.58e-06	4.98e-05
SUCNR1	ENSG00000198829.6	72.1091	-1.4168	0.295167	-4.80001	1.59e-06	4.98e-05
ARRDC4	ENSG00000140450.9	199.664	-0.752708	0.156826	-4.79963	1.59e-06	4.98e-05
XPC	ENSG00000154767.14	582.387	-0.478457	0.0997318	-4.79743	1.61e-06	5.02e-05
UBL4A	ENSG00000102178.13	561.34	-0.352815	0.0735972	-4.79386	1.64e-06	5.1e-05
GPR137B	ENSG00000077585.14	175.221	0.588553	0.122987	4.78547	1.71e-06	5.3e-05
HM13	ENSG00000101294.17	2032.06	-0.28194	0.0589418	-4.78336	1.72e-06	5.34e-05
RNF24	ENSG00000101236.17	291.107	0.502099	0.104971	4.7832	1.73e-06	5.34e-05
GPRC5A	ENSG00000013588.8	53.885	-1.07779	0.225424	-4.78118	1.74e-06	5.38e-05
PIK3CA	ENSG00000121879.5	298.718	-0.429852	0.0902504	-4.76288	1.91e-06	5.87e-05
TIMM17B	ENSG00000126768.12	471.099	-0.472434	0.0995598	-4.74523	2.08e-06	6.39e-05
SHE	ENSG00000169291.10	170	1.23764	0.261285	4.73676	2.17e-06	6.65e-05
SPAG5	ENSG00000076382.17	882.883	0.552439	0.116692	4.73417	2.2e-06	6.73e-05
UNC13D	ENSG00000092929.11	825.178	0.352882	0.0746061	4.72993	2.25e-06	6.86e-05
ZMIZ1	ENSG00000108175.17	828.369	0.403846	0.0854079	4.72843	2.26e-06	6.88e-05
TTC39B	ENSG00000155158.20	10.1556	-2.34301	0.495526	-4.72833	2.26e-06	6.88e-05
RNF113A	ENSG00000125352.6	217.052	-0.476821	0.100852	-4.72792	2.27e-06	6.88e-05
CYP27A1	ENSG00000135929.9	7.67807	-2.74884	0.581484	-4.72729	2.28e-06	6.89e-05
METTL27	ENSG00000165171.11	14.1969	2.57598	0.544971	4.72682	2.28e-06	6.89e-05
BAG5	ENSG00000166170.9	869.523	0.299784	0.0634818	4.72237	2.33e-06	7.03e-05
TRIM58	ENSG00000162722.9	34.7799	1.68135	0.356474	4.71662	2.4e-06	7.22e-05
HHLA2	ENSG00000114455.13	6.68354	-4.00803	0.850895	-4.71037	2.47e-06	7.43e-05
B4GALT7	ENSG00000027847.14	363.533	-0.3911	0.0830972	-4.70654	2.52e-06	7.56e-05
GUCY1A1	ENSG00000164116.16	37.9509	-1.25898	0.267654	-4.70375	2.55e-06	7.65e-05
BIRC5	ENSG00000089685.15	479.173	0.554581	0.117925	4.70282	2.57e-06	7.67e-05
PLK2	ENSG00000145632.15	223.389	-0.745235	0.158638	-4.69772	2.63e-06	7.85e-05
HELZ	ENSG00000198265.12	1436.86	0.242104	0.0515892	4.69292	2.69e-06	8.02e-05
KDM5C	ENSG00000126012.11	1554.45	-0.334151	0.0712257	-4.69144	2.71e-06	8.06e-05
MARCHF3	ENSG00000173926.6	297.094	-0.462754	0.098884	-4.67977	2.87e-06	8.52e-05
IFT57	ENSG00000114446.5	56.9455	-0.937626	0.200391	-4.67899	2.88e-06	8.53e-05
HLA-DRB1	ENSG00000196126.11	10073.2	-0.811121	0.1734	-4.67774	2.9e-06	8.56e-05
LMNB1	ENSG00000113368.12	1381.72	0.457511	0.0978085	4.67762	2.9e-06	8.56e-05
CDK14	ENSG00000058091.17	28.2253	-2.28093	0.488167	-4.67245	2.98e-06	8.76e-05
HMGCL	ENSG00000117305.15	469.98	-0.334031	0.071609	-4.66466	3.09e-06	9.08e-05
DLGAP5	ENSG00000126787.13	321.595	0.812707	0.174344	4.6615	3.14e-06	9.2e-05
BBC3	ENSG00000105327.17	106.345	-0.807657	0.173321	-4.65989	3.16e-06	9.26e-05
NCKAP5	ENSG00000176771.17	615.68	0.413828	0.0888293	4.65869	3.18e-06	9.29e-05
B3GAT3	ENSG00000149541.10	397.86	-0.455634	0.0978911	-4.65449	3.25e-06	9.46e-05
SAMD9L	ENSG00000177409.12	102.916	-0.764478	0.16425	-4.65437	3.25e-06	9.46e-05
NKAP	ENSG00000101882.10	199.226	-0.562757	0.120947	-4.65291	3.27e-06	9.51e-05
FCGR1B	ENSG00000198019.13	643.901	-0.362657	0.0779611	-4.65177	3.29e-06	9.52e-05
CXCR2	ENSG00000180871.8	398.161	-0.449445	0.0966183	-4.65176	3.29e-06	9.52e-05
NADSYN1	ENSG00000172890.13	1459.29	-0.402225	0.0865775	-4.64584	3.39e-06	9.78e-05
HDAC8	ENSG00000147099.21	267.637	-0.454904	0.098183	-4.63323	3.6e-06	0.000103401
SLC2A6	ENSG00000160326.14	428.715	-0.735294	0.158844	-4.62904	3.67e-06	0.000105316
CRISPLD2	ENSG00000103196.12	20.6447	1.71444	0.370598	4.62616	3.73e-06	0.000106595
RGPD2	ENSG00000185304.15	121.606	-5.01102	1.08536	-4.61693	3.89e-06	0.000111166
FGL2	ENSG00000127951.7	1603.31	-0.634074	0.137344	-4.61669	3.9e-06	0.000111166
RASGEF1C	ENSG00000146090.16	50.471	1.21898	0.264119	4.61526	3.93e-06	0.000111731
PAQR5	ENSG00000137819.14	478.453	0.506486	0.109814	4.61223	3.98e-06	0.000113061
NXT2	ENSG00000101888.11	304.944	-0.631488	0.136925	-4.61192	3.99e-06	0.000113061
NOP58	ENSG00000055044.11	623.609	0.336734	0.0730178	4.61166	3.99e-06	0.000113061
ANGPTL6	ENSG00000130812.10	37.9731	-1.24738	0.270886	-4.60483	4.13e-06	0.000116416
MMP7	ENSG00000137673.9	3.25799	-5.55824	1.20723	-4.60412	4.14e-06	0.000116603
ST3GAL2	ENSG00000157350.13	597.772	-0.31171	0.0677209	-4.60287	4.17e-06	0.000117002
TFEC	ENSG00000105967.16	1250.11	-0.361244	0.0784861	-4.60265	4.17e-06	0.000117002
VSIG4	ENSG00000155659.15	4348.75	-0.50773	0.110533	-4.59347	4.36e-06	0.000122052
F8A3	ENSG00000277150.1	7.53837	-4.84741	1.0557	-4.59165	4.4e-06	0.000122905
MPP1	ENSG00000130830.15	1263.31	-0.505953	0.110277	-4.58803	4.47e-06	0.000124826
ETV1	ENSG00000006468.14	110.271	0.872008	0.190085	4.58746	4.49e-06	0.000124863
FAM120B	ENSG00000112584.13	440.735	0.361725	0.078855	4.58723	4.49e-06	0.000124863
MAMDC2	ENSG00000165072.10	45.4341	1.25441	0.273659	4.58383	4.57e-06	0.000126685
RBM10	ENSG00000182872.16	671.814	-0.318245	0.0695335	-4.57687	4.72e-06	0.000130738
CCL2	ENSG00000108691.9	610.316	-0.767336	0.16768	-4.57619	4.74e-06	0.000130932
SLC4A8	ENSG00000050438.17	128.39	-0.664147	0.1452	-4.574	4.78e-06	0.000132069
KHDRBS3	ENSG00000131773.14	41.8813	-1.5638	0.341988	-4.57267	4.82e-06	0.000132674
NEK2	ENSG00000117650.13	152.85	0.72489	0.158886	4.56233	5.06e-06	0.000139138
CDK1	ENSG00000170312.16	752.718	0.412574	0.0904427	4.56171	5.07e-06	0.000139173
PHF19	ENSG00000119403.15	581.786	0.490403	0.107508	4.56154	5.08e-06	0.000139173
ZFP36L1	ENSG00000185650.10	1256.7	0.342647	0.0751776	4.55783	5.17e-06	0.000141399
HNRNPC	ENSG00000092199.17	4648.72	0.230261	0.0505333	4.55662	5.2e-06	0.000141971
LRRC37A2	ENSG00000238083.7	196.318	-0.510367	0.112233	-4.54738	5.43e-06	0.000148088
BAX	ENSG00000087088.20	842.423	-0.277595	0.0610701	-4.54552	5.48e-06	0.000149139
CALM1	ENSG00000198668.12	5563.78	-0.147229	0.0323938	-4.54499	5.49e-06	0.000149252
MOSPD2	ENSG00000130150.12	414.37	-0.502098	0.110613	-4.53923	5.65e-06	0.000153122
SPATA18	ENSG00000163071.11	69.7169	-0.861815	0.189909	-4.53804	5.68e-06	0.000153716
DIAPH1	ENSG00000131504.17	1828.6	0.20613	0.0454371	4.53659	5.72e-06	0.000154512
RELB	ENSG00000104856.14	265.156	-0.657118	0.1449	-4.53499	5.76e-06	0.00015542
NBPF12	ENSG00000268043.7	506.221	0.355409	0.0783909	4.5338	5.79e-06	0.000156023
YWHAE	ENSG00000108953.17	2755.41	0.261875	0.0578004	4.53069	5.88e-06	0.000158069
ADAM15	ENSG00000143537.13	454.051	-0.396115	0.0874946	-4.52731	5.97e-06	0.000160342
TCEAL1	ENSG00000172465.14	166.334	-0.621311	0.137255	-4.52667	5.99e-06	0.000160544
NAA10	ENSG00000102030.16	441.739	-0.469425	0.103722	-4.5258	6.02e-06	0.000160934
DAB2IP	ENSG00000136848.17	50.4083	-1.02211	0.226263	-4.51734	6.26e-06	0.000167211
PTPRC	ENSG00000081237.20	6199.9	-0.360914	0.0799463	-4.51445	6.35e-06	0.000168665
CCND2	ENSG00000118971.8	146.455	-0.845567	0.187304	-4.51441	6.35e-06	0.000168665
TIPARP	ENSG00000163659.13	632.71	0.337325	0.0748061	4.50933	6.5e-06	0.000172468
SLC10A3	ENSG00000126903.16	186.673	-0.697527	0.154793	-4.5062	6.6e-06	0.000174728
GSDMD	ENSG00000104518.11	556.735	0.3826	0.0849319	4.50478	6.64e-06	0.000175601
HTATSF1	ENSG00000102241.12	629.499	-0.369058	0.0819376	-4.50414	6.66e-06	0.000175837
GDE1	ENSG00000006007.12	1174.44	0.2683	0.0595768	4.50343	6.69e-06	0.000176126
LY86	ENSG00000112799.9	1832.33	-0.26019	0.0578064	-4.50106	6.76e-06	0.000177803
RABAC1	ENSG00000105404.11	404.622	-0.458995	0.101987	-4.50052	6.78e-06	0.000177953
PRKCA	ENSG00000154229.12	2584.63	0.206017	0.0457938	4.49879	6.83e-06	0.000179107
RTN1	ENSG00000139970.17	2577.59	-0.263997	0.0587386	-4.49444	6.98e-06	0.000182495
CD300LF	ENSG00000186074.19	1287.58	-0.242311	0.0539384	-4.49235	7.04e-06	0.000183984
IL7R	ENSG00000168685.15	452.77	0.406584	0.0906985	4.4828	7.37e-06	0.000192096
PLCXD1	ENSG00000182378.14	195.073	0.582409	0.12998	4.48074	7.44e-06	0.000193632
COMMD7	ENSG00000149600.11	611.751	0.305714	0.0682523	4.47918	7.49e-06	0.000194731
AKAP11	ENSG00000023516.9	1107.95	0.292746	0.0653841	4.47732	7.56e-06	0.000196105
RGS1	ENSG00000090104.12	2535.33	-1.03686	0.231684	-4.47533	7.63e-06	0.000197618
ITGB3	ENSG00000259207.8	415.861	0.530807	0.118677	4.47269	7.72e-06	0.000199734
PHKA2	ENSG00000044446.12	381.994	-0.457316	0.102383	-4.46672	7.94e-06	0.00020505
BASP1	ENSG00000176788.9	154.025	0.762776	0.170797	4.46598	7.97e-06	0.000205419
NR1H2	ENSG00000131408.15	544.141	-0.398842	0.0893544	-4.4636	8.06e-06	0.000207376
KIAA1324L	ENSG00000164659.15	58.6606	1.06279	0.23814	4.46288	8.09e-06	0.000207731
RBM38	ENSG00000132819.17	1992.31	0.203837	0.0457156	4.4588	8.24e-06	0.000211026
CDCA8	ENSG00000134690.11	277.11	0.599155	0.134392	4.45827	8.26e-06	0.000211203
KLHL6	ENSG00000172578.12	725.462	-0.345753	0.0776052	-4.45528	8.38e-06	0.000213809
ACAP1	ENSG00000072818.12	676.357	0.382346	0.0858276	4.45481	8.4e-06	0.000213934
CAPN1	ENSG00000014216.15	1010.7	-0.306498	0.0688086	-4.45436	8.41e-06	0.000214029
ACAD11	ENSG00000240303.8	142.461	-0.612099	0.137582	-4.44897	8.63e-06	0.000218984
MX1	ENSG00000157601.14	109.918	-0.682326	0.153375	-4.44875	8.64e-06	0.000218984
CXorf56	ENSG00000018610.14	269.629	-0.439698	0.0988635	-4.44753	8.69e-06	0.000219513
KCNC3	ENSG00000131398.14	28.4809	-2.25942	0.508034	-4.44739	8.69e-06	0.000219513
ENGASE	ENSG00000167280.16	629.481	-0.485268	0.109118	-4.44718	8.7e-06	0.000219513
APBA2	ENSG00000034053.14	33.9942	1.78899	0.402657	4.44295	8.87e-06	0.000223511
UBXN6	ENSG00000167671.12	1029.97	-0.269767	0.0607375	-4.44152	8.93e-06	0.000224637
THBD	ENSG00000178726.7	243.612	0.523824	0.118004	4.43903	9.04e-06	0.000226524
MAOA	ENSG00000189221.9	194.572	-0.683087	0.154148	-4.43136	9.36e-06	0.000234357
CLCN7	ENSG00000103249.18	1049.04	-0.394845	0.0892781	-4.42264	9.75e-06	0.000243631
GNL3	ENSG00000163938.17	729.764	0.3567	0.0806755	4.42141	9.81e-06	0.000244628
ORAI3	ENSG00000175938.7	786.524	-0.279777	0.0632889	-4.42063	9.84e-06	0.000245124
PARP14	ENSG00000173193.15	1539.8	0.219348	0.0496901	4.41431	1.01e-05	0.00025199
NDUFA1	ENSG00000125356.7	823.993	-0.330468	0.0748871	-4.41288	1.02e-05	0.000253251
PRIMPOL	ENSG00000164306.11	127.989	-0.632849	0.143453	-4.41155	1.03e-05	0.000254408
C9orf16	ENSG00000171159.5	410.167	-0.43834	0.0994166	-4.40912	1.04e-05	0.000256871
CCZ1B	ENSG00000146574.15	375.17	0.623364	0.141408	4.40825	1.04e-05	0.000257496
PGRMC1	ENSG00000101856.10	633.21	-0.344786	0.0782282	-4.40744	1.05e-05	0.000258056
PRTFDC1	ENSG00000099256.19	57.5788	0.955961	0.217022	4.4049	1.06e-05	0.000260488
SLC49A3	ENSG00000169026.12	75.1559	0.930193	0.211181	4.40472	1.06e-05	0.000260488
ACER3	ENSG00000078124.12	1747.09	-0.264569	0.0601385	-4.39934	1.09e-05	0.000266185
HSP90AB1	ENSG00000096384.20	8617.67	0.238002	0.054114	4.39815	1.09e-05	0.000266766
MGLL	ENSG00000074416.14	538.003	0.643494	0.146315	4.39801	1.09e-05	0.000266766
CENPF	ENSG00000117724.13	2720.38	0.582066	0.132353	4.39784	1.09e-05	0.000266766
TBX3	ENSG00000135111.16	51.2772	-0.908919	0.206717	-4.39693	1.1e-05	0.000267474
TLE4	ENSG00000106829.19	433.278	0.354052	0.0806855	4.38804	1.14e-05	0.000277766
TBC1D3L	ENSG00000274512.5	57.7232	1.03559	0.236067	4.38685	1.15e-05	0.000278861
OMA1	ENSG00000162600.12	183.7	-0.549451	0.12527	-4.38613	1.15e-05	0.000279343
HS3ST1	ENSG00000002587.10	108.129	-1.01595	0.231856	-4.3818	1.18e-05	0.000284512
IRAK3	ENSG00000090376.11	1632.76	-0.444986	0.101561	-4.38146	1.18e-05	0.000284512
HEBP2	ENSG00000051620.11	330.908	0.407073	0.0929291	4.38047	1.18e-05	0.000285373
MTR	ENSG00000116984.13	2406.86	0.218069	0.049792	4.3796	1.19e-05	0.000286067
TAZ	ENSG00000102125.16	478.091	-0.368361	0.08417	-4.37639	1.21e-05	0.000288597
WWC3	ENSG00000047644.18	163.086	-0.57248	0.130812	-4.37635	1.21e-05	0.000288597
UPF2	ENSG00000151461.20	707.027	0.287154	0.0656151	4.37634	1.21e-05	0.000288597
PCM1	ENSG00000078674.17	3325.78	0.281387	0.0643184	4.3749	1.21e-05	0.000290066
ICOSLG	ENSG00000160223.17	184.944	-0.963388	0.220293	-4.37321	1.22e-05	0.000291865
DNAJC13	ENSG00000138246.17	2530.04	0.297525	0.0680704	4.37084	1.24e-05	0.000294156
ATP5F1C	ENSG00000165629.20	1760.11	0.267497	0.0612452	4.36765	1.26e-05	0.000298032
MBD3	ENSG00000071655.18	1235.85	-0.327256	0.0750372	-4.36125	1.29e-05	0.000306411
GBGT1	ENSG00000148288.13	383.494	-0.386619	0.0886625	-4.36057	1.3e-05	0.000306906
ST14	ENSG00000149418.11	2969.71	0.283697	0.0651697	4.35321	1.34e-05	0.000316916
SGPP1	ENSG00000126821.8	834.104	-0.364059	0.0836423	-4.35257	1.35e-05	0.00031736
PCK2	ENSG00000100889.12	498.857	-0.35033	0.0806232	-4.34527	1.39e-05	0.000327604
NLRP1	ENSG00000091592.16	693.034	-0.428019	0.0985957	-4.34115	1.42e-05	0.000333302
GRK3	ENSG00000100077.15	1220.51	-0.286044	0.0659046	-4.34028	1.42e-05	0.000334121
ZNF835	ENSG00000127903.14	3.22124	-4.99168	1.15085	-4.33738	1.44e-05	0.000338047
FKBP5	ENSG00000096060.14	325.167	-0.39676	0.091493	-4.3365	1.45e-05	0.000338889
SLC25A20	ENSG00000178537.10	286.96	0.541307	0.124949	4.33223	1.48e-05	0.000345007
RPLP2	ENSG00000177600.9	3824.13	-0.206983	0.0477863	-4.33143	1.48e-05	0.00034524
MT-CO1	ENSG00000198804.2	27435.4	-0.380059	0.0879037	-4.32358	1.54e-05	0.000357216
AMDHD2	ENSG00000162066.15	765.453	-0.439028	0.101603	-4.32101	1.55e-05	0.000360862
REEP1	ENSG00000068615.18	273.05	0.465586	0.107963	4.31248	1.61e-05	0.000374521
SCN1B	ENSG00000105711.12	31.0881	1.67556	0.388586	4.31195	1.62e-05	0.000374855
HLA-DRB5	ENSG00000198502.6	5194.6	0.956503	0.222175	4.30519	1.67e-05	0.000385928
GPX4	ENSG00000167468.17	1887.01	-0.286627	0.0666271	-4.30196	1.69e-05	0.000389849
PPP1R21	ENSG00000162869.16	500.239	0.437274	0.101838	4.29382	1.76e-05	0.000403749
SERPINA1	ENSG00000197249.14	1291.4	-0.637385	0.14852	-4.29157	1.77e-05	0.000406149
PGA4	ENSG00000229183.8	161.309	1.83582	0.428061	4.28868	1.8e-05	0.000410861
IL4I1	ENSG00000104951.16	128.442	-0.666527	0.155441	-4.28799	1.8e-05	0.000411545
MAP3K11	ENSG00000173327.8	1154.46	-0.26525	0.0618672	-4.28741	1.81e-05	0.000412008
NBPF26	ENSG00000273136.7	167.988	0.572105	0.133454	4.2869	1.81e-05	0.000412351
RSRP1	ENSG00000117616.18	1032.57	-0.267591	0.06243	-4.28625	1.82e-05	0.00041295
ZBED1	ENSG00000214717.12	1007.8	-0.263465	0.0616018	-4.27691	1.9e-05	0.000430026
NRN1	ENSG00000124785.9	11.122	2.65477	0.621139	4.27403	1.92e-05	0.000434986
FAM50A	ENSG00000071859.15	728.159	-0.430117	0.1007	-4.27127	1.94e-05	0.000439782
RTCB	ENSG00000100220.12	1879.07	0.217779	0.0510051	4.26975	1.96e-05	0.00044175
MS4A7	ENSG00000166927.13	1221.87	-0.371952	0.087116	-4.26962	1.96e-05	0.00044175
LAMP1	ENSG00000185896.11	2438.23	-0.240618	0.0564055	-4.26587	1.99e-05	0.000448601
CKAP5	ENSG00000175216.15	2397.38	0.376399	0.0882653	4.26441	2e-05	0.000450886
COL9A2	ENSG00000049089.15	98.8493	-0.698412	0.163935	-4.26029	2.04e-05	0.000458401
FFAR2	ENSG00000126262.4	168.248	-0.928742	0.218012	-4.26005	2.04e-05	0.000458401
CEMIP2	ENSG00000135048.14	797.195	-0.266864	0.0626671	-4.25843	2.06e-05	0.000460443
TMEM45A	ENSG00000181458.10	5.77014	-3.30054	0.775704	-4.2549	2.09e-05	0.000467108
PSTPIP2	ENSG00000152229.18	828.223	0.308568	0.0726151	4.24936	2.14e-05	0.000477428
SLC12A8	ENSG00000221955.10	46.7364	0.983644	0.2317	4.24533	2.18e-05	0.000485406
TOP2A	ENSG00000131747.15	4214.68	0.469098	0.110656	4.23924	2.24e-05	0.000497344
ZC3H12C	ENSG00000149289.11	1438.8	-0.33733	0.0796191	-4.2368	2.27e-05	0.000502057
MCC	ENSG00000171444.18	291.822	0.434823	0.102639	4.23642	2.27e-05	0.000502195
DNAJC25-GNG10	ENSG00000244115.1	91.108	0.689634	0.162876	4.2341	2.29e-05	0.000505963
MVB12B	ENSG00000196814.15	90.022	1.08963	0.257384	4.2335	2.3e-05	0.000506602
FGD2	ENSG00000146192.15	2423.98	-0.262075	0.0619435	-4.23087	2.33e-05	0.000511836
CALHM6	ENSG00000188820.13	315.32	-0.485647	0.114898	-4.22675	2.37e-05	0.000520556
SYT11	ENSG00000132718.9	96.5749	-1.02937	0.243653	-4.22473	2.39e-05	0.000524514
TBC1D4	ENSG00000136111.14	2914.16	-0.179583	0.0425225	-4.22324	2.41e-05	0.000527258
BTBD3	ENSG00000132640.15	469.866	-0.361241	0.0855568	-4.22224	2.42e-05	0.000528866
SDCBP	ENSG00000137575.12	2446.84	-0.23686	0.0561533	-4.2181	2.46e-05	0.000536909
B3GNT7	ENSG00000156966.7	316.9	0.434215	0.102946	4.21788	2.47e-05	0.000536909
MCRIP1	ENSG00000225663.8	559.816	-0.318596	0.07557	-4.2159	2.49e-05	0.000540885
GPX3	ENSG00000211445.12	210.593	0.461393	0.109482	4.21431	2.51e-05	0.000543955
ECHS1	ENSG00000127884.5	887.927	0.315165	0.074882	4.20883	2.57e-05	0.000556545
CSNK1G1	ENSG00000169118.18	352.471	0.349906	0.0831859	4.20631	2.6e-05	0.000561995
PHLDA3	ENSG00000174307.7	56.5036	-1.47172	0.350451	-4.19949	2.68e-05	0.000578095
CEACAM1	ENSG00000079385.22	34.9403	-1.18165	0.281392	-4.19929	2.68e-05	0.000578095
HPS1	ENSG00000107521.19	1788.1	-0.290086	0.0691952	-4.19228	2.76e-05	0.000595442
PLEKHO2	ENSG00000241839.10	3425.4	-0.223105	0.0532373	-4.19076	2.78e-05	0.000598612
EIF3K	ENSG00000178982.10	1910.08	0.216991	0.0517929	4.18959	2.79e-05	0.000600884
AGO1	ENSG00000092847.12	884.01	-0.267336	0.0638417	-4.18748	2.82e-05	0.000605649
SPTBN5	ENSG00000137877.10	28.6893	-1.49807	0.357781	-4.18712	2.83e-05	0.000605771
GTF3C6	ENSG00000155115.7	401.387	0.343524	0.0820708	4.18571	2.84e-05	0.000608718
PKIB	ENSG00000135549.15	805.823	-0.550181	0.13152	-4.18325	2.87e-05	0.000614481
GLIPR2	ENSG00000122694.16	128.816	-0.693373	0.165917	-4.17904	2.93e-05	0.000625127
RNF13	ENSG00000082996.19	1055.6	-0.270831	0.0648569	-4.17582	2.97e-05	0.000632285
RXRA	ENSG00000186350.12	4366.53	0.261416	0.0626411	4.17324	3e-05	0.000638188
MEFV	ENSG00000103313.12	573.031	0.30604	0.0733393	4.17293	3.01e-05	0.000638188
SERPINB6	ENSG00000124570.20	1232.54	0.332671	0.0797253	4.17272	3.01e-05	0.000638188
ELP2	ENSG00000134759.14	656.138	0.368826	0.0883953	4.17246	3.01e-05	0.000638188
ARL6IP5	ENSG00000144746.7	2158.22	-0.212838	0.0510309	-4.17076	3.04e-05	0.000641227
LPGAT1	ENSG00000123684.13	1260.03	-0.401727	0.0963612	-4.16898	3.06e-05	0.0006454
SPINT2	ENSG00000167642.13	690.908	0.382432	0.0917837	4.16667	3.09e-05	0.00065108
MDN1	ENSG00000112159.12	1740.17	0.29865	0.0716989	4.16534	3.11e-05	0.000653999
HDAC5	ENSG00000108840.15	1254.01	-0.237724	0.0572166	-4.1548	3.26e-05	0.000683951
ARHGAP11A	ENSG00000198826.11	439.447	0.515335	0.124064	4.15378	3.27e-05	0.00068609
TXNRD3	ENSG00000197763.17	23.1403	2.42179	0.583245	4.15227	3.29e-05	0.000689721
LRIG3	ENSG00000139263.11	158.745	1.06796	0.257329	4.15019	3.32e-05	0.000695069
ABCG1	ENSG00000160179.18	477.531	0.767547	0.185002	4.14886	3.34e-05	0.000698174
UBE2C	ENSG00000175063.17	368.152	0.684927	0.165113	4.14823	3.35e-05	0.000699173
RACGAP1	ENSG00000161800.13	643.455	0.370159	0.0893055	4.14486	3.4e-05	0.000707627
DUSP10	ENSG00000143507.18	461.86	-0.365314	0.0882574	-4.13919	3.49e-05	0.000724387
RPL12	ENSG00000197958.13	6538.2	0.169175	0.0408791	4.13843	3.5e-05	0.000725832
CLCN4	ENSG00000073464.12	524.116	-0.348897	0.0843481	-4.13639	3.53e-05	0.000731327
LAGE3	ENSG00000196976.7	237.504	-0.530866	0.128373	-4.13536	3.54e-05	0.000733648
ANLN	ENSG00000011426.11	707.46	0.554351	0.134085	4.13432	3.56e-05	0.000735997
SULT4A1	ENSG00000130540.14	7.8577	5.37999	1.30161	4.13335	3.58e-05	0.000737623
DNMT3B	ENSG00000088305.18	128.603	1.14808	0.277771	4.1332	3.58e-05	0.000737623
ATF4	ENSG00000128272.14	3386.72	0.163883	0.0397117	4.12681	3.68e-05	0.000757413
RPS2	ENSG00000140988.16	10384.4	-0.237605	0.0576092	-4.12443	3.72e-05	0.000764268
CDCA3	ENSG00000111665.11	256.04	0.651578	0.158027	4.12321	3.74e-05	0.000767314
GNS	ENSG00000135677.11	5061.77	-0.239445	0.0581803	-4.11557	3.86e-05	0.000791096
IL10RB	ENSG00000243646.10	1034.56	0.24569	0.0597214	4.11394	3.89e-05	0.000795651
STARD7	ENSG00000084090.13	3268.48	0.15559	0.0378638	4.10922	3.97e-05	0.000811038
DHRS4	ENSG00000157326.19	206.464	-0.552461	0.134509	-4.10724	4e-05	0.000816145
FAM120C	ENSG00000184083.12	90.7983	-0.676948	0.164821	-4.10716	4.01e-05	0.000816145
FDXR	ENSG00000161513.12	164.158	-0.605039	0.147436	-4.10373	4.07e-05	0.000827267
NADK	ENSG00000008130.15	1454.52	-0.228204	0.0556136	-4.10339	4.07e-05	0.000827407
SULT1C2	ENSG00000198203.10	20.4014	2.47382	0.602976	4.10269	4.08e-05	0.000828838
MS4A14	ENSG00000166928.11	40.2978	1.59289	0.388429	4.10085	4.12e-05	0.000834367
MICA	ENSG00000204520.14	101.728	0.648312	0.158237	4.09709	4.18e-05	0.000846934
PGAM1	ENSG00000171314.9	3596.9	0.215792	0.0526921	4.09534	4.22e-05	0.000852258
SCAMP5	ENSG00000198794.12	125.272	0.649202	0.158777	4.08876	4.34e-05	0.000875639
MAP7D3	ENSG00000129680.16	206.79	-0.42496	0.103961	-4.0877	4.36e-05	0.000878492
NBDY	ENSG00000204272.13	395.872	-0.589249	0.144243	-4.08512	4.41e-05	0.00088717
LGALS3	ENSG00000131981.16	267.714	-0.939881	0.230134	-4.08405	4.43e-05	0.00089011
ZDHHC3	ENSG00000163812.15	1507.96	0.245027	0.0601456	4.0739	4.62e-05	0.000927447
DNAJC4	ENSG00000110011.13	439.869	-0.387951	0.0953632	-4.06814	4.74e-05	0.000949257
ANXA6	ENSG00000197043.14	1407.51	0.462788	0.113766	4.06789	4.74e-05	0.000949257
GRN	ENSG00000030582.18	21232.6	-0.235028	0.0577938	-4.06666	4.77e-05	0.000953057
F2R	ENSG00000181104.7	40.7711	1.20743	0.296971	4.06583	4.79e-05	0.000955227
TESC	ENSG00000088992.18	1105.97	0.350793	0.0864468	4.0579	4.95e-05	0.000985184
CPD	ENSG00000108582.12	1944.36	-0.34889	0.0859841	-4.05761	4.96e-05	0.000985184
PTCHD4	ENSG00000244694.7	6.51216	-2.77606	0.684187	-4.05745	4.96e-05	0.000985184
GNB4	ENSG00000114450.10	3062.14	-0.227471	0.0560629	-4.05742	4.96e-05	0.000985184
DNTTIP1	ENSG00000101457.13	381.825	-0.368245	0.0907811	-4.05641	4.98e-05	0.000988024
C1orf21	ENSG00000116667.14	10.3965	-2.54934	0.628511	-4.05616	4.99e-05	0.000988024
IFI6	ENSG00000126709.15	73.3013	-0.727592	0.179719	-4.04849	5.15e-05	0.00101964
HOOK3	ENSG00000168172.9	1209.2	0.237578	0.0587121	4.0465	5.2e-05	0.00102705
EPS15	ENSG00000085832.17	1410.39	0.276264	0.0682961	4.04509	5.23e-05	0.00103062
ZCCHC24	ENSG00000165424.7	396.246	-0.327954	0.0811507	-4.0413	5.32e-05	0.0010455
H1-1	ENSG00000124610.4	16.3078	-2.65755	0.657624	-4.04114	5.32e-05	0.0010455
SLC25A29	ENSG00000197119.13	179.488	-0.61806	0.15314	-4.03592	5.44e-05	0.00106766
PHLDA1	ENSG00000139289.13	133.209	-0.852333	0.211295	-4.03386	5.49e-05	0.00107574
PDPN	ENSG00000162493.16	28.7657	2.81045	0.696845	4.0331	5.5e-05	0.00107785
CCDC88B	ENSG00000168071.22	1711.69	-0.331698	0.0823031	-4.03019	5.57e-05	0.0010899
NDUFV2	ENSG00000178127.13	1003.77	0.274723	0.0681815	4.02928	5.59e-05	0.00109276
ACADVL	ENSG00000072778.20	1694.95	0.326801	0.0811343	4.0279	5.63e-05	0.00109782
CD200R1	ENSG00000163606.11	23.5521	-2.46898	0.613277	-4.02588	5.68e-05	0.00110593
CYTL1	ENSG00000170891.11	32.408	-1.08242	0.269225	-4.0205	5.81e-05	0.00113006
SOWAHD	ENSG00000187808.5	159.171	-0.677541	0.168646	-4.01753	5.88e-05	0.00114299
RNF149	ENSG00000163162.9	1118.95	-0.257857	0.0641987	-4.01654	5.91e-05	0.00114635
SMPDL3A	ENSG00000172594.13	64.5852	1.45435	0.362235	4.01495	5.95e-05	0.00115266
FEZ2	ENSG00000171055.15	404.337	0.395596	0.0987953	4.0042	6.22e-05	0.00120335
STAT4	ENSG00000138378.19	3.22566	-4.45769	1.11345	-4.00348	6.24e-05	0.00120551
EHD4	ENSG00000103966.11	1106.03	-0.529471	0.13232	-4.00143	6.3e-05	0.00121449
RAD52	ENSG00000002016.18	88.7358	0.74832	0.187159	3.9983	6.38e-05	0.00122915
DPF3	ENSG00000205683.11	131.55	0.58248	0.145803	3.99498	6.47e-05	0.00124498
MB	ENSG00000198125.13	73.7738	0.942499	0.235979	3.994	6.5e-05	0.00124857
PCGF2	ENSG00000277258.5	21.5005	-1.47785	0.370129	-3.99281	6.53e-05	0.00125333
PTTG1	ENSG00000164611.13	247.82	0.633117	0.158634	3.99105	6.58e-05	0.00126113
EMC4	ENSG00000128463.13	409.873	-0.304228	0.0763913	-3.98249	6.82e-05	0.0013058
NMNAT3	ENSG00000163864.17	26.7836	1.28001	0.321541	3.98087	6.87e-05	0.0013118
TACSTD2	ENSG00000184292.7	2066.93	0.318519	0.0800133	3.98082	6.87e-05	0.0013118
RUFY4	ENSG00000188282.12	36.0858	1.28916	0.324218	3.9762	7e-05	0.00133587
OARD1	ENSG00000124596.17	186.018	0.533207	0.134145	3.97485	7.04e-05	0.00134184
CKAP2L	ENSG00000169607.13	355.343	0.605318	0.152334	3.97362	7.08e-05	0.00134714
COLGALT1	ENSG00000130309.11	3880.03	0.210111	0.0528857	3.97293	7.1e-05	0.00134939
TARS1	ENSG00000113407.13	2223.92	0.181569	0.0457155	3.97173	7.14e-05	0.00135458
TCEAL4	ENSG00000133142.17	457.754	-0.378723	0.0953859	-3.97043	7.17e-05	0.0013603
SIGLEC9	ENSG00000129450.8	823.881	0.317644	0.0800377	3.96868	7.23e-05	0.00136869
SNX24	ENSG00000064652.11	218.428	-0.53641	0.135264	-3.96566	7.32e-05	0.00138445
GDA	ENSG00000119125.16	274.699	-0.894006	0.225542	-3.96382	7.38e-05	0.00139349
TCF4	ENSG00000196628.18	3183.99	-0.381463	0.0962573	-3.96294	7.4e-05	0.00139689
ITGAL	ENSG00000005844.18	2879.21	0.180609	0.0455891	3.96167	7.44e-05	0.0014027
SMIM29	ENSG00000186577.14	249.256	-0.509198	0.12858	-3.96015	7.49e-05	0.00140991
DUSP27	ENSG00000198842.10	578.43	-0.348021	0.0879204	-3.95836	7.55e-05	0.0014188
CSNK2A1	ENSG00000101266.19	1435.92	0.202027	0.0510678	3.95605	7.62e-05	0.00143086
RNF135	ENSG00000181481.14	856.245	-0.275944	0.0697663	-3.95527	7.64e-05	0.00143384
SHB	ENSG00000107338.10	94.2707	0.773429	0.195619	3.95375	7.69e-05	0.00144126
RASSF1	ENSG00000068028.17	692.212	0.333308	0.0843705	3.95053	7.8e-05	0.00145902
MAPK13	ENSG00000156711.17	160.513	-0.636351	0.161249	-3.94639	7.93e-05	0.00148269
PCSK5	ENSG00000099139.14	72.5968	0.761128	0.193179	3.94001	8.15e-05	0.00152081
SERPINI1	ENSG00000163536.12	20.2498	-1.50371	0.381707	-3.93943	8.17e-05	0.00152271
RNASE6	ENSG00000169413.3	3372.43	0.22964	0.0583948	3.93255	8.41e-05	0.00156509
IGBP1	ENSG00000089289.16	562.742	-0.306185	0.0778694	-3.93204	8.42e-05	0.00156654
KIFC3	ENSG00000140859.16	197.289	0.506794	0.128975	3.92939	8.52e-05	0.00158199
PTGFRN	ENSG00000134247.10	1210.1	-0.219252	0.055822	-3.92771	8.58e-05	0.0015912
CTPS1	ENSG00000171793.16	467.971	0.295818	0.0753271	3.92712	8.6e-05	0.0015932
NAAA	ENSG00000138744.16	468.44	0.369669	0.0942146	3.92369	8.72e-05	0.00161413
GKN2	ENSG00000183607.10	5.29346	-3.13958	0.800457	-3.92223	8.77e-05	0.00162109
GABRA3	ENSG00000011677.13	152.888	-0.5956	0.151858	-3.92208	8.78e-05	0.00162109
CST7	ENSG00000077984.6	35.7077	1.35076	0.344522	3.92069	8.83e-05	0.00162857
HJURP	ENSG00000123485.12	331.012	0.496004	0.126665	3.91587	9.01e-05	0.00165686
LNPK	ENSG00000144320.14	401.661	-0.449291	0.11475	-3.9154	9.03e-05	0.00165686
MTMR2	ENSG00000087053.18	188.891	0.489267	0.12496	3.9154	9.03e-05	0.00165686
TOB1	ENSG00000141232.5	130.542	-0.546279	0.139553	-3.91449	9.06e-05	0.00166116
EOGT	ENSG00000163378.14	344.385	0.32449	0.0829365	3.91251	9.13e-05	0.00167282
BDP1	ENSG00000145734.19	1102.39	0.215144	0.0550663	3.907	9.35e-05	0.00170739
F8	ENSG00000185010.15	237.604	-0.432246	0.110634	-3.90698	9.35e-05	0.00170739
AXL	ENSG00000167601.12	7341.51	0.356092	0.0911484	3.90672	9.36e-05	0.00170739
PDSS1	ENSG00000148459.16	113.784	0.703481	0.180096	3.90615	9.38e-05	0.00170942
NPM1	ENSG00000181163.13	5659.31	0.217608	0.055789	3.90055	9.6e-05	0.00174743
LILRB5	ENSG00000105609.17	20.3251	3.05773	0.784479	3.89778	9.71e-05	0.00176337
LIMS1	ENSG00000169756.16	2231.3	-0.263565	0.0676315	-3.89708	9.74e-05	0.00176644
ADAM19	ENSG00000135074.15	179.036	0.954141	0.24486	3.89668	9.75e-05	0.00176717
SMOX	ENSG00000088826.18	983.734	0.257634	0.0661209	3.89641	9.76e-05	0.00176717
MTPAP	ENSG00000107951.14	398.552	0.415269	0.106603	3.89548	9.8e-05	0.00177197
ABCC3	ENSG00000108846.16	89.6915	1.40936	0.362363	3.88935	0.000100512	0.00181516
RNF31	ENSG00000092098.17	422.381	-0.349548	0.0899369	-3.88659	0.000101662	0.00183168
LY96	ENSG00000154589.7	143.603	-0.662511	0.170493	-3.88585	0.000101973	0.00183516
NUF2	ENSG00000143228.13	164.574	0.58162	0.149801	3.88261	0.00010334	0.00185761
CHMP2B	ENSG00000083937.9	386.557	-0.392517	0.101149	-3.8806	0.000104199	0.00187089
NEK9	ENSG00000119638.13	903.173	-0.236326	0.0610016	-3.87409	0.000107022	0.00191717
TES	ENSG00000135269.18	772.733	0.26509	0.0684922	3.87036	0.000108674	0.00194318
TASOR2	ENSG00000108021.20	989.543	0.259286	0.0669946	3.87025	0.000108724	0.00194318
ASAP2	ENSG00000151693.11	5.40999	-2.9528	0.763951	-3.86516	0.000111015	0.0019798
TECR	ENSG00000099797.15	853.96	0.242399	0.0627141	3.86514	0.000111028	0.0019798
BUB1B	ENSG00000156970.12	589.887	0.338942	0.0877235	3.86376	0.000111657	0.00198874
TPX2	ENSG00000088325.16	754.561	0.572901	0.148296	3.86322	0.000111902	0.00199083
CMC4	ENSG00000182712.16	79.9916	-0.81197	0.21045	-3.85825	0.0001142	0.00202939
UBE2L6	ENSG00000156587.16	572.234	-0.270542	0.0701562	-3.85629	0.000115122	0.00204344
SEMA4A	ENSG00000196189.13	412.296	0.820149	0.212767	3.85468	0.000115879	0.00205455
EXTL3	ENSG00000012232.9	516.363	-0.375697	0.0975243	-3.85234	0.000116993	0.00207193
ITPKB	ENSG00000143772.9	319.636	-0.358663	0.093166	-3.84972	0.000118251	0.00209184
DHRS3	ENSG00000162496.9	376.156	0.320096	0.0832003	3.8473	0.000119428	0.00211025
ARL5A	ENSG00000162980.17	950.469	-0.478407	0.124405	-3.84556	0.000120277	0.00212285
KCNE3	ENSG00000175538.10	958.616	-0.234794	0.0611097	-3.84218	0.000121948	0.0021499
CDC20	ENSG00000117399.14	460.722	0.614945	0.160094	3.84115	0.000122457	0.00215643
CASP1	ENSG00000137752.24	1902.87	0.319219	0.0831551	3.83884	0.000123616	0.00217439
MAFF	ENSG00000185022.12	200.815	-0.545185	0.142028	-3.83856	0.000123758	0.00217442
LMTK2	ENSG00000164715.6	263.574	-0.403759	0.105217	-3.83737	0.000124357	0.00218248
TTK	ENSG00000112742.10	254.069	0.426044	0.111045	3.83669	0.000124703	0.00218609
LETMD1	ENSG00000050426.16	365.992	0.387553	0.101069	3.83453	0.000125804	0.00220044
AKR1A1	ENSG00000117448.13	3070.86	-0.160249	0.0418005	-3.83368	0.000126242	0.00220563
POLM	ENSG00000122678.17	229.706	-0.472558	0.123274	-3.83339	0.000126392	0.00220576
RASGRP1	ENSG00000172575.12	3.86974	-4.1926	1.09459	-3.83031	0.000127983	0.00223102
TYW1	ENSG00000198874.13	356.348	0.380743	0.0994196	3.82966	0.000128322	0.00223444
ADK	ENSG00000156110.14	284.832	0.392521	0.102506	3.82926	0.000128529	0.00223553
NUTM2D	ENSG00000214562.14	94.5093	0.652608	0.170658	3.82407	0.000131269	0.00227819
C3	ENSG00000125730.17	85032.1	-0.224514	0.0587109	-3.82406	0.000131273	0.00227819
LYZ	ENSG00000090382.7	565.465	-0.561917	0.14698	-3.8231	0.000131785	0.00228452
ERBIN	ENSG00000112851.14	1817.34	-0.231196	0.0605631	-3.81744	0.000134844	0.00233495
MMS19	ENSG00000155229.21	801.172	0.279659	0.0732809	3.81627	0.000135487	0.00234321
LIN28B	ENSG00000187772.8	437.426	0.387303	0.101494	3.81602	0.000135622	0.00234321
GAREM1	ENSG00000141441.16	66.7261	0.726671	0.190662	3.81131	0.000138231	0.00238299
HEATR3	ENSG00000155393.13	577.293	0.299815	0.0786769	3.8107	0.000138571	0.00238426
NUTM2B	ENSG00000188199.10	26.8036	-1.29147	0.338911	-3.81063	0.000138611	0.00238426
LPAR2	ENSG00000064547.14	57.2024	-0.736219	0.193229	-3.81008	0.000138923	0.00238699
BLVRA	ENSG00000106605.11	51.5064	1.33788	0.351229	3.80914	0.00013945	0.0023934
LPAR3	ENSG00000171517.6	15.2325	-2.17541	0.571245	-3.80819	0.000139989	0.0024
KNSTRN	ENSG00000128944.13	440.695	0.46402	0.121962	3.80461	0.000142027	0.00243228
KIF14	ENSG00000118193.12	327.539	0.540831	0.142213	3.80296	0.000142979	0.00244588
EFCAB2	ENSG00000203666.12	24.3215	-1.26453	0.332577	-3.80221	0.000143414	0.00245063
AMIGO1	ENSG00000181754.7	14.0566	1.6835	0.44282	3.80177	0.000143668	0.00245228
NFKBIE	ENSG00000146232.17	1307.04	-0.241618	0.0636271	-3.7974	0.00014622	0.00249038
BCR	ENSG00000186716.21	347.358	0.365984	0.0964819	3.79329	0.000148663	0.00252921
PDLIM7	ENSG00000196923.14	85.1145	-0.863703	0.227769	-3.79201	0.000149435	0.00253958
CLEC5A	ENSG00000258227.7	1287.17	0.544342	0.143623	3.79008	0.000150599	0.00255658
NDUFB9	ENSG00000147684.9	587.982	0.279156	0.0736685	3.78936	0.000151037	0.00256122
CENPA	ENSG00000115163.15	113.245	0.661705	0.174905	3.78323	0.000154803	0.00262222
PLEKHM2	ENSG00000116786.13	1415.93	-0.199069	0.0526294	-3.78248	0.000155275	0.00262736
AFG3L2	ENSG00000141385.10	1400.72	0.192281	0.0508489	3.78141	0.000155942	0.00263578
ADCY3	ENSG00000138031.14	225.82	0.528755	0.139852	3.78083	0.000156304	0.00263903
IL1RN	ENSG00000136689.18	253.934	0.40173	0.10627	3.78027	0.00015666	0.00264217
ZDHHC7	ENSG00000153786.12	1271.47	0.209928	0.0555573	3.77859	0.00015772	0.00265717
NAP1L1	ENSG00000187109.14	5102.45	-0.299608	0.0793456	-3.77598	0.000159378	0.00268016
NDUFA12	ENSG00000184752.13	515.084	0.39647	0.105	3.7759	0.000159434	0.00268016
TMEM50A	ENSG00000183726.11	1151.05	-0.208877	0.0553223	-3.77563	0.000159601	0.00268016
ACE	ENSG00000159640.16	5.49831	4.87325	1.29086	3.77518	0.000159889	0.00268211
LHFPL2	ENSG00000145685.14	1799.65	-0.220231	0.0583842	-3.77211	0.000161874	0.00271248
MARVELD1	ENSG00000155254.13	112.737	0.613451	0.16267	3.77113	0.00016251	0.0027202
STBD1	ENSG00000118804.8	3.66982	-4.62928	1.22776	-3.7705	0.000162921	0.00272415
UTP11	ENSG00000183520.12	334.335	0.342586	0.0908993	3.76885	0.000164	0.00273926
EIF4A1	ENSG00000161960.15	10382.5	0.194735	0.0516809	3.76802	0.00016455	0.00274256
KHNYN	ENSG00000100441.10	1807.18	-0.239544	0.0636413	-3.76397	0.000167235	0.00278433
ALCAM	ENSG00000170017.12	1947.83	-0.209439	0.0556573	-3.76302	0.000167876	0.00279202
SIGLEC8	ENSG00000105366.15	29.0851	-1.07937	0.287137	-3.75908	0.000170542	0.00283332
RYK	ENSG00000163785.12	190.257	-0.496812	0.13222	-3.75746	0.000171645	0.00284861
SH3TC1	ENSG00000125089.17	2921.47	-0.219249	0.0583788	-3.75563	0.000172909	0.00286653
EGLN2	ENSG00000269858.6	1097.46	-0.260683	0.0694192	-3.7552	0.000173202	0.00286834
BRWD3	ENSG00000165288.11	404.859	-0.339736	0.0905059	-3.75374	0.000174213	0.00288202
HDAC1	ENSG00000116478.12	1158.35	0.234448	0.0624804	3.75234	0.000175195	0.00289517
TLCD5	ENSG00000181264.8	7.35006	-2.29181	0.610941	-3.75127	0.000175938	0.00290437
GIPC1	ENSG00000123159.16	754.758	-0.283089	0.0754904	-3.75	0.000176837	0.00291613
PIK3R6	ENSG00000276231.5	70.2165	-0.684222	0.182508	-3.74899	0.000177547	0.00292473
GAPDH	ENSG00000111640.15	17023	0.154029	0.0411007	3.74759	0.000178539	0.00293797
CXCR4	ENSG00000121966.7	46.5579	-1.2442	0.332095	-3.74651	0.000179313	0.00294758
ZC3H12A	ENSG00000163874.11	386.953	-0.531321	0.141839	-3.74596	0.000179706	0.00295093
AGPS	ENSG00000018510.16	907.216	-0.220286	0.0588212	-3.74501	0.000180385	0.00295584
SEMA4C	ENSG00000168758.11	4224.99	0.213454	0.0570112	3.74407	0.000181066	0.00296388
CEP55	ENSG00000138180.16	415.534	0.508952	0.136129	3.73874	0.000184947	0.00302424
CLEC12A	ENSG00000172322.14	7.76971	3.26689	0.87388	3.73837	0.000185214	0.00302543
TBC1D10C	ENSG00000175463.12	458.757	0.397046	0.106224	3.73781	0.00018563	0.00302904
PGK1	ENSG00000102144.15	7707.84	-0.139062	0.0372107	-3.73715	0.000186118	0.00303381
PNPT1	ENSG00000138035.15	307.156	0.32985	0.0882788	3.73646	0.000186631	0.00303901
RIPK3	ENSG00000129465.16	297.859	-0.404216	0.108195	-3.73601	0.000186966	0.00304127
HSPA8	ENSG00000109971.14	17435	0.136521	0.0365558	3.73459	0.00018802	0.00305523
ITGA9	ENSG00000144668.12	326.19	0.700241	0.187536	3.73389	0.000188541	0.0030605
ALDH1B1	ENSG00000137124.8	227.763	-0.465052	0.12464	-3.73118	0.000190588	0.00309051
HLA-DQB1	ENSG00000179344.16	2848.26	0.779132	0.208851	3.73056	0.000191056	0.0030929
LEO1	ENSG00000166477.13	246.385	0.404415	0.108409	3.73046	0.000191133	0.0030929
RAN	ENSG00000132341.12	2917.45	0.221807	0.0594635	3.73014	0.000191372	0.00309354
WWP1	ENSG00000123124.14	704.825	0.417884	0.112065	3.72894	0.000192287	0.00310511
NFKB2	ENSG00000077150.20	232.94	-0.489276	0.131253	-3.72774	0.000193208	0.00311676
RASAL2	ENSG00000075391.16	1186.39	-0.318003	0.0853363	-3.72647	0.000194182	0.00312922
SDSL	ENSG00000139410.15	242.16	-0.38058	0.102154	-3.72555	0.000194891	0.00313417
POU2F2	ENSG00000028277.21	381.525	-0.596982	0.160401	-3.72181	0.000197798	0.00317742
UQCRH	ENSG00000173660.12	1220.78	0.219031	0.0588545	3.72157	0.000197989	0.00317742
CHD2	ENSG00000173575.22	2129.9	0.187553	0.0504239	3.71953	0.000199597	0.00319992
CCR1	ENSG00000163823.4	1508.92	0.398902	0.107331	3.71656	0.000201955	0.0032344
MRM2	ENSG00000122687.19	630.241	0.265244	0.0713807	3.7159	0.00020248	0.00323948
RPS10-NUDT3	ENSG00000270800.3	320.776	0.620383	0.166975	3.71541	0.000202873	0.00324242
SLC47A1	ENSG00000142494.13	21.7509	1.88824	0.508265	3.71506	0.000203156	0.00324362
KLF6	ENSG00000067082.15	1001.16	0.276442	0.0745079	3.71024	0.000207059	0.00330255
TNIP1	ENSG00000145901.15	1931.62	-0.39131	0.105492	-3.70937	0.000207774	0.00331056
CDH20	ENSG00000101542.10	36.3891	-1.18954	0.32094	-3.70643	0.000210198	0.00334575
KCNJ2	ENSG00000123700.5	1077.83	-0.228252	0.0616446	-3.70271	0.000213313	0.00339187
AP1M1	ENSG00000072958.8	595.25	-0.326136	0.0882224	-3.69674	0.000218384	0.00346543
FCRL4	ENSG00000163518.11	207.749	1.45463	0.393589	3.69581	0.000219183	0.00347368
DOCK11	ENSG00000147251.15	2180.21	-0.236954	0.0641176	-3.69562	0.00021935	0.00347368
PCDH12	ENSG00000113555.5	298.788	0.872371	0.236147	3.69419	0.000220586	0.00348969
RAB3IL1	ENSG00000167994.13	778.233	0.435222	0.117851	3.69298	0.000221646	0.0035029
PDXK	ENSG00000160209.19	2961.08	-0.152359	0.0412701	-3.69174	0.000222721	0.00351633
CETN2	ENSG00000147400.10	168.342	-0.452588	0.122606	-3.6914	0.000223021	0.00351749
RPL36A	ENSG00000241343.9	2657.1	-0.234339	0.0635017	-3.69028	0.000224007	0.00352947
LIPA	ENSG00000107798.18	4034.41	-0.229853	0.0622951	-3.68974	0.000224484	0.00353134
PLEKHA5	ENSG00000052126.14	77.0559	0.801775	0.217305	3.68963	0.000224579	0.00353134
CYBB	ENSG00000165168.8	33650.1	-0.375321	0.101791	-3.68717	0.00022676	0.00356203
TNPO3	ENSG00000064419.13	1031.85	0.205349	0.0557017	3.68659	0.000227277	0.00356655
P2RY11	ENSG00000244165.2	629.327	-0.304309	0.0825526	-3.68624	0.000227594	0.00356794
RCOR1	ENSG00000089902.10	884.477	0.2168	0.0588283	3.6853	0.000228435	0.00357752
CD14	ENSG00000170458.14	5927.36	-1.11658	0.303045	-3.68456	0.000229102	0.00358435
G0S2	ENSG00000123689.6	21.8452	-1.22512	0.332558	-3.68393	0.000229664	0.00358953
PRAG1	ENSG00000275342.5	308.762	-0.335934	0.0912229	-3.68256	0.000230905	0.00360532
DBNDD2	ENSG00000244274.7	604.671	0.300016	0.0814792	3.68211	0.000231307	0.00360797
SLC25A6	ENSG00000169100.14	3589.11	-0.168363	0.0457525	-3.67987	0.000233352	0.00363258
PHETA1	ENSG00000198324.13	512.848	-0.316519	0.0860625	-3.67777	0.000235278	0.00365892
STIMATE	ENSG00000213533.12	451.659	-0.295788	0.0804486	-3.67674	0.000236238	0.00367017
KCNQ1	ENSG00000053918.18	542.155	0.396693	0.107918	3.67587	0.000237036	0.00367891
TLR2	ENSG00000137462.8	3778.28	-0.192061	0.0522988	-3.67238	0.000240298	0.00372582
PPP1R9B	ENSG00000108819.11	1329.09	-0.27456	0.074822	-3.66951	0.000243021	0.00376428
GSN	ENSG00000148180.19	23498.9	-0.179827	0.0490469	-3.66643	0.000245961	0.00380604
KLHL24	ENSG00000114796.16	753.567	-0.378657	0.103287	-3.66607	0.000246302	0.00380754
TSPAN15	ENSG00000099282.10	951.508	-0.294871	0.0804478	-3.66537	0.000246977	0.00381417
ME2	ENSG00000082212.13	1235.67	0.193084	0.0527291	3.66181	0.000250436	0.00386376
SF3B6	ENSG00000115128.7	354.834	0.3318	0.0906495	3.66025	0.000251968	0.00388142
IGF1R	ENSG00000140443.15	47.0048	1.26965	0.346885	3.66014	0.000252079	0.00388142
CD2AP	ENSG00000198087.7	579.292	0.248698	0.068018	3.65636	0.000255826	0.0039315
MIB2	ENSG00000197530.12	203.896	-0.478681	0.130919	-3.65633	0.000255853	0.0039315
KCTD20	ENSG00000112078.14	2471.76	0.185809	0.0508216	3.65609	0.000256089	0.0039315
PAG1	ENSG00000076641.4	1676.94	-0.163413	0.0447017	-3.65564	0.000256544	0.00393461
GOSR2	ENSG00000108433.16	740.174	0.248569	0.0680775	3.65126	0.000260953	0.00399828
LONRF3	ENSG00000175556.17	24.9518	-1.69261	0.463678	-3.6504	0.000261836	0.00400787
WBP1L	ENSG00000166272.18	1659.28	-0.176229	0.0482819	-3.65	0.000262236	0.00400885
MFHAS1	ENSG00000147324.11	396.996	0.308256	0.0844576	3.64983	0.000262415	0.00400885
PLTP	ENSG00000100979.15	310.331	2.19664	0.602023	3.64876	0.00026351	0.00402163
SSPN	ENSG00000123096.11	118.135	-0.644879	0.17684	-3.64669	0.000265642	0.00405019
TUBB4B	ENSG00000188229.6	1370.97	0.371031	0.101757	3.64625	0.000266091	0.00405307
DDB2	ENSG00000134574.11	441.957	-0.335289	0.0919793	-3.64527	0.000267114	0.0040607
NEXMIF	ENSG00000050030.15	75.7798	0.696961	0.191261	3.64402	0.000268408	0.00407639
TNFAIP3	ENSG00000118503.15	1477.38	-0.516838	0.14189	-3.64251	0.000269989	0.00409641
RNPEP	ENSG00000176393.11	1571.91	0.272395	0.0747944	3.64191	0.000270618	0.00410196
AP2A2	ENSG00000183020.13	1172.86	0.411829	0.113123	3.64053	0.000272079	0.0041184
VAV3	ENSG00000134215.16	282.74	0.372748	0.102392	3.64038	0.000272232	0.0041184
GYG2	ENSG00000056998.20	8.54368	-1.97787	0.543441	-3.63953	0.000273131	0.00412799
C12orf66	ENSG00000174206.12	82.2886	0.65061	0.178881	3.63711	0.000275719	0.00416306
XYLT1	ENSG00000103489.12	620.203	0.280401	0.0771471	3.63463	0.00027838	0.00419916
ARL17B	ENSG00000228696.9	64.0071	0.715759	0.196944	3.63433	0.000278703	0.00419997
ATP6V0D1	ENSG00000159720.12	3376.52	-0.159025	0.0437607	-3.63396	0.000279103	0.00420193
EPHB2	ENSG00000133216.16	608.382	-0.547426	0.15068	-3.63304	0.000280097	0.00421282
SSU72	ENSG00000160075.12	951.825	0.228178	0.0628337	3.63146	0.000281826	0.00423474
FUBP1	ENSG00000162613.16	1147.8	0.214947	0.0592012	3.63079	0.000282551	0.00423856
THBS3	ENSG00000169231.13	89.7511	-0.685208	0.188725	-3.63073	0.000282625	0.00423856
OPTN	ENSG00000123240.17	38.6421	-1.51981	0.418868	-3.62837	0.000285216	0.0042733
FNBP4	ENSG00000109920.13	711.752	0.227112	0.0627095	3.62166	0.00029272	0.0043773
ATP6V0B	ENSG00000117410.14	2695.08	-0.157212	0.0434188	-3.62082	0.000293667	0.00438725
WEE1	ENSG00000166483.11	277.416	0.346105	0.0956205	3.61956	0.000295101	0.00440263
GALNT1	ENSG00000141429.13	2020.48	-0.246924	0.0682219	-3.61942	0.000295262	0.00440263
CYSLTR2	ENSG00000152207.7	42.501	-1.19716	0.3312	-3.61462	0.000300785	0.0044764
MLLT6	ENSG00000275023.5	1291.52	-0.206148	0.0570781	-3.61168	0.000304221	0.00452128
PEBP1	ENSG00000089220.5	1595.76	0.163351	0.0452302	3.61154	0.000304381	0.00452128
SEMA6B	ENSG00000167680.16	148.631	0.594323	0.164611	3.61046	0.000305659	0.00453593
CACYBP	ENSG00000116161.18	960.424	0.246417	0.0683237	3.6066	0.000310232	0.00459269
NUSAP1	ENSG00000137804.14	1104.93	0.265518	0.0736225	3.60649	0.000310372	0.00459269
MKI67	ENSG00000148773.14	2431.62	0.399123	0.110674	3.6063	0.000310597	0.00459269
NDRG3	ENSG00000101079.21	572.849	0.272096	0.0754515	3.60624	0.000310664	0.00459269
MTMR1	ENSG00000063601.17	610.313	-0.41986	0.116444	-3.60566	0.000311356	0.00459795
ZNF471	ENSG00000196263.8	7.81783	-1.98625	0.550903	-3.60545	0.00031161	0.00459795
RAB10	ENSG00000084733.11	1821.24	-0.165723	0.0460186	-3.60122	0.000316722	0.00466529
TMED1	ENSG00000099203.7	276.439	-0.343074	0.0952669	-3.60118	0.000316774	0.00466529
ABCD1	ENSG00000101986.12	412.87	-0.397856	0.110676	-3.59479	0.000324658	0.00477238
SGK1	ENSG00000118515.11	3364.19	-0.306352	0.0852752	-3.59251	0.000327503	0.00480966
CD226	ENSG00000150637.9	30.9899	1.38925	0.387359	3.58647	0.000335185	0.00491784
ZNF689	ENSG00000156853.13	1347.55	0.183443	0.051164	3.58539	0.000336569	0.00493349
FRRS1	ENSG00000156869.13	169.823	-0.935283	0.260956	-3.58406	0.000338291	0.00495406
QSOX1	ENSG00000116260.17	2530.18	0.22905	0.0639213	3.58332	0.000339253	0.00496124
ARL8B	ENSG00000134108.13	1071.5	-0.28217	0.0787481	-3.58319	0.000339418	0.00496124
ZSWIM6	ENSG00000130449.6	775.482	0.235664	0.0658243	3.58019	0.000343338	0.00501383
POR	ENSG00000127948.16	216.745	-0.464433	0.129809	-3.57783	0.000346457	0.00504921
LRRFIP1	ENSG00000124831.19	1847.69	0.224464	0.0627394	3.57772	0.000346609	0.00504921
AC005833.1	ENSG00000255639.3	91.135	0.764013	0.213553	3.57762	0.000346734	0.00504921
BRCC3	ENSG00000185515.14	335.492	-0.38239	0.106905	-3.57693	0.000347653	0.00505787
CYFIP1	ENSG00000273749.5	17293.1	-0.325738	0.0911019	-3.57553	0.000349517	0.00507827
TRIM72	ENSG00000177238.14	10.4531	-1.73445	0.485108	-3.57539	0.000349708	0.00507827
CKS1B	ENSG00000173207.13	424.733	0.279072	0.0780999	3.57326	0.000352558	0.00511099
LGI2	ENSG00000153012.12	52.8447	0.82605	0.231178	3.57322	0.000352618	0.00511099
SRSF7	ENSG00000115875.19	1528.46	0.212352	0.0594376	3.57269	0.000353338	0.00511667
ANKRD39	ENSG00000213337.9	228.109	0.508394	0.142346	3.57155	0.00035488	0.00513422
SLC2A5	ENSG00000142583.18	112.288	0.934534	0.261773	3.57001	0.000356968	0.00515963
SRRM2	ENSG00000167978.17	1706.99	0.21277	0.0596766	3.56539	0.000363317	0.00524245
ANKH	ENSG00000154122.14	1467.99	0.275853	0.0773705	3.56535	0.000363371	0.00524245
SLAMF7	ENSG00000026751.17	804.498	-0.244218	0.0685301	-3.56366	0.000365721	0.00527146
SH3KBP1	ENSG00000147010.18	2945.56	-0.267558	0.0751351	-3.56103	0.000369406	0.00531965
SLC25A3	ENSG00000075415.12	5810.09	0.152746	0.0429149	3.55928	0.000371871	0.00534525
MAF1	ENSG00000179632.10	972.242	-0.222445	0.0625552	-3.55599	0.00037656	0.00540767
ZNF449	ENSG00000173275.13	146.176	-0.505475	0.142167	-3.55549	0.000377269	0.00541286
ALOX5	ENSG00000012779.11	3835.97	-0.158012	0.0444463	-3.55513	0.000377787	0.00541346
ATP5PO	ENSG00000241837.7	1303.41	0.213954	0.0601844	3.55498	0.000378007	0.00541346
AP5Z1	ENSG00000242802.9	673.481	-0.260003	0.0732433	-3.54985	0.000385447	0.00551494
NR4A1	ENSG00000123358.20	37.3312	-1.52234	0.428967	-3.54886	0.000386897	0.0055306
PPP2R3A	ENSG00000073711.11	92.793	-0.870463	0.245415	-3.5469	0.000389787	0.00556329
ZNF667	ENSG00000198046.12	5.75808	-2.78162	0.784256	-3.54683	0.000389898	0.00556329
STAB1	ENSG00000010327.10	53972.3	0.172829	0.0487439	3.54566	0.000391624	0.00558279
FCGBP	ENSG00000275395.6	83332.8	-0.221368	0.0624798	-3.54303	0.000395551	0.00563361
KIF17	ENSG00000117245.12	116.929	-0.538391	0.152019	-3.54161	0.000397699	0.00565863
NSD1	ENSG00000165671.20	2095.8	0.221745	0.0626249	3.54084	0.000398858	0.00566517
SEPTIN6	ENSG00000125354.23	913.571	-0.215573	0.0608975	-3.53993	0.00040024	0.00567961
EIF2A	ENSG00000144895.12	896.832	0.31889	0.09011	3.5389	0.000401804	0.00569661
MBNL2	ENSG00000139793.18	223.814	-0.421794	0.119299	-3.5356	0.000406851	0.00576292
FCGRT	ENSG00000104870.13	12977.8	0.227039	0.0642511	3.53361	0.000409918	0.00580109
DUSP4	ENSG00000120875.9	108.802	0.796772	0.225625	3.5314	0.000413361	0.0058445
SGPL1	ENSG00000166224.17	2401.96	0.430229	0.121855	3.53067	0.000414515	0.0058555
AC091230.1	ENSG00000140474.14	1395.54	-0.24347	0.0690063	-3.52823	0.000418341	0.00590419
MARK3	ENSG00000075413.18	791.373	0.241092	0.0683626	3.52666	0.00042083	0.00593394
CORO1B	ENSG00000172725.14	3623.32	-0.210465	0.0597067	-3.52498	0.000423516	0.00595562
PRDX4	ENSG00000123131.13	831.479	-0.353231	0.100215	-3.52474	0.000423903	0.00595569
MRI1	ENSG00000037757.14	349.765	0.34432	0.0977213	3.52349	0.000425899	0.00597141
CD302	ENSG00000241399.7	1090.81	-0.434773	0.123393	-3.52348	0.000425913	0.00597141
LHPP	ENSG00000107902.14	104.97	-0.555392	0.157643	-3.52311	0.00042651	0.00597141
LIMK2	ENSG00000182541.18	496.222	-0.25593	0.0726437	-3.52308	0.000426556	0.00597141
SLC25A39	ENSG00000013306.16	1277.65	-0.241235	0.0684896	-3.52221	0.000427957	0.00598563
IFNLR1	ENSG00000185436.12	527.145	-0.256572	0.0728564	-3.52161	0.000428927	0.00599381
BEX3	ENSG00000166681.14	22.1819	-1.31528	0.373618	-3.52039	0.00043091	0.00601295
ALKBH7	ENSG00000125652.8	363.496	-0.353714	0.10048	-3.52026	0.000431129	0.00601295
ZC3HAV1L	ENSG00000146858.8	16.4422	1.61777	0.459617	3.51983	0.000431821	0.00601295
WDR5B	ENSG00000196981.4	87.9468	-0.622965	0.17699	-3.51977	0.000431915	0.00601295
GPC1	ENSG00000063660.9	70.0446	-0.776884	0.220739	-3.51947	0.000432417	0.00601295
JUN	ENSG00000177606.7	593.032	-0.383115	0.10886	-3.51934	0.000432614	0.00601295
GTSE1	ENSG00000075218.19	217.809	0.535502	0.152172	3.51906	0.000433082	0.00601408
EDN1	ENSG00000078401.7	19.3796	-1.4173	0.402827	-3.51839	0.00043418	0.00602396
AKAP12	ENSG00000131016.17	57.8935	0.776731	0.220979	3.51495	0.00043984	0.00609705
ANXA2	ENSG00000182718.16	5071.13	0.439435	0.125139	3.51158	0.000445454	0.00616937
NNT	ENSG00000112992.18	1040.85	0.294757	0.0839475	3.5112	0.000446081	0.00617257
MCM4	ENSG00000104738.18	1762.89	0.230829	0.0658025	3.50791	0.00045165	0.00624408
CD81	ENSG00000110651.11	6494.82	-0.208051	0.0593153	-3.50755	0.000452252	0.00624685
ADAM17	ENSG00000151694.14	1235.19	-0.190328	0.0543204	-3.50379	0.00045868	0.00632589
C5AR1	ENSG00000197405.8	618.493	0.294612	0.0842176	3.49823	0.00046836	0.00644359
DDX60L	ENSG00000181381.13	402.127	-0.346625	0.099089	-3.49811	0.000468564	0.00644359
CERS4	ENSG00000090661.12	533.563	-0.304665	0.0871011	-3.49784	0.000469048	0.00644454
LMO7	ENSG00000136153.20	1139.06	0.286209	0.0818645	3.49613	0.000472058	0.00648018
NIPAL2	ENSG00000104361.10	158.857	-0.586291	0.167734	-3.49535	0.000473433	0.00648762
CCNA2	ENSG00000145386.10	615.692	0.417309	0.119527	3.49134	0.000480607	0.00657434
ARHGEF6	ENSG00000129675.16	2114.95	-0.294119	0.0843214	-3.48807	0.00048652	0.0066494
SNW1	ENSG00000100603.13	882.233	0.236695	0.0679104	3.4854	0.000491401	0.00671022
EGLN1	ENSG00000135766.9	686.613	-0.294647	0.0845672	-3.48417	0.000493663	0.00673519
LPCAT3	ENSG00000111684.11	210.667	0.606019	0.173949	3.48389	0.000494183	0.00673638
BSG	ENSG00000172270.20	1885.62	-0.198508	0.0570014	-3.48251	0.000496731	0.00676398
ACSL4	ENSG00000068366.20	3163.63	-0.454283	0.130454	-3.48233	0.000497076	0.00676398
TRERF1	ENSG00000124496.12	255.209	-0.411189	0.118099	-3.48172	0.000498213	0.00677352
GFRA2	ENSG00000168546.11	60.5533	1.12052	0.321939	3.48054	0.000500399	0.00679731
SLC16A10	ENSG00000112394.17	3.00137	-4.36981	1.2556	-3.48027	0.000500913	0.00679835
MSN	ENSG00000147065.17	16472.1	-0.181923	0.0523052	-3.4781	0.000504972	0.00684455
MPC2	ENSG00000143158.11	588.743	-0.349518	0.100503	-3.4777	0.000505738	0.00684455
UQCRC2	ENSG00000140740.11	2144.24	0.234988	0.0675713	3.47764	0.000505856	0.00684455
PIF1	ENSG00000140451.13	84.5727	1.07933	0.310386	3.47737	0.000506367	0.00684455
TNFRSF13C	ENSG00000159958.6	22.8618	1.52673	0.439057	3.47729	0.000506515	0.00684455
OCA2	ENSG00000104044.16	6.10383	3.57029	1.02726	3.47555	0.000509812	0.0068795
SFPQ	ENSG00000116560.11	2883.54	0.147537	0.042451	3.47546	0.000509985	0.0068795
STRBP	ENSG00000165209.19	260.047	-0.329704	0.0949102	-3.47386	0.000513036	0.00691359
SLC2A9	ENSG00000109667.12	93.4336	0.690647	0.198831	3.47353	0.000513665	0.00691359
ZNF483	ENSG00000173258.13	25.1663	1.47165	0.423687	3.47343	0.000513845	0.00691359
GPX7	ENSG00000116157.6	40.5533	1.55889	0.449231	3.47014	0.000520195	0.00699299
GPR68	ENSG00000119714.11	432.126	-0.304117	0.0876463	-3.46983	0.000520796	0.00699503
CCR7	ENSG00000126353.3	91.0396	-1.07882	0.311027	-3.46858	0.000523214	0.0070154
OSBPL1A	ENSG00000141447.18	577.017	0.452072	0.130362	3.46781	0.000524709	0.00702939
TRAM1	ENSG00000067167.8	1237.48	-0.334057	0.0964215	-3.46455	0.000531128	0.00710925
KCNC4	ENSG00000116396.14	88.9082	-0.745874	0.215393	-3.46285	0.000534495	0.00714819
PLK4	ENSG00000142731.11	311.839	0.381119	0.110085	3.46205	0.000536069	0.00716308
PPARA	ENSG00000186951.16	337.112	-0.294238	0.0850374	-3.4601	0.000539979	0.00720914
MIOS	ENSG00000164654.16	1023.06	0.200943	0.0580799	3.45976	0.000540656	0.00721199
MOSPD1	ENSG00000101928.13	136.804	-0.610834	0.176621	-3.45844	0.000543322	0.00724134
DDX39B	ENSG00000198563.14	1785.83	0.195762	0.0566392	3.4563	0.00054765	0.007289
PLXNB2	ENSG00000196576.15	2847.04	-0.179536	0.051946	-3.45621	0.000547834	0.007289
UBE2Q2	ENSG00000140367.12	464.437	0.313712	0.0907912	3.45532	0.000549649	0.0073069
IFIH1	ENSG00000115267.8	212.374	-0.455504	0.13184	-3.45498	0.00055033	0.00730972
ANAPC11	ENSG00000141552.17	444.699	-0.261697	0.0757839	-3.45321	0.000553966	0.00734548
STIL	ENSG00000123473.15	353.489	0.287765	0.0833664	3.45181	0.000556837	0.00737726
FAM149A	ENSG00000109794.13	243.447	0.410824	0.119113	3.44902	0.000562628	0.00744764
HIVEP1	ENSG00000095951.17	192.552	0.591253	0.171441	3.44872	0.00056325	0.00744954
CERCAM	ENSG00000167123.19	23.2855	1.10385	0.320157	3.44784	0.000565088	0.00746489
LRP11	ENSG00000120256.11	82.4898	0.590608	0.171305	3.44771	0.00056537	0.00746489
IER5	ENSG00000162783.11	823.282	-0.444447	0.128939	-3.44696	0.000566927	0.00747911
JAG1	ENSG00000101384.12	604.639	0.408698	0.118584	3.44649	0.000567926	0.00748594
MRPS5	ENSG00000144029.12	536.8	0.335019	0.0972262	3.44577	0.000569432	0.00749945
VPS26B	ENSG00000151502.11	740.583	-0.202536	0.0587868	-3.44526	0.000570506	0.00750724
ZNF780A	ENSG00000197782.14	658.37	0.220696	0.0640895	3.44357	0.000574096	0.0075481
CEBPZ	ENSG00000115816.15	627.273	0.293096	0.0851586	3.44177	0.00057792	0.00759197
PPA1	ENSG00000180817.12	718.1	0.368075	0.107136	3.43557	0.000591299	0.00775212
PHKB	ENSG00000102893.16	887.95	0.217142	0.0632066	3.43543	0.000591605	0.00775212
SIPA1L1	ENSG00000197555.9	825.441	0.255933	0.0746183	3.42989	0.000603823	0.00790556
CS	ENSG00000062485.19	1978.37	0.21668	0.063211	3.42788	0.000608316	0.00795769
CNPY2	ENSG00000257727.6	504.479	-0.246431	0.0719438	-3.42533	0.000614053	0.00802599
CALML4	ENSG00000129007.14	256.364	0.347559	0.1015	3.42423	0.000616553	0.00804516
APOOL	ENSG00000155008.14	96.5513	-0.552598	0.161426	-3.42322	0.00061884	0.00806824
UBE2D3	ENSG00000109332.20	2473.51	-0.286146	0.083632	-3.42148	0.000622802	0.00811311
NUP205	ENSG00000155561.15	1590.78	0.250586	0.0733481	3.41639	0.000634565	0.00825942
MARCKS	ENSG00000277443.3	3248.61	-0.401953	0.117681	-3.41563	0.000636347	0.00827569
NDUFA6	ENSG00000184983.11	700.477	0.227333	0.0665789	3.4145	0.000639002	0.0083033
PPARGC1B	ENSG00000155846.17	528.15	0.315554	0.0924847	3.41196	0.000644974	0.00836896
ATP5PB	ENSG00000116459.11	2366.42	0.190325	0.0557828	3.41189	0.000645131	0.00836896
CDS1	ENSG00000163624.6	12.5111	1.86422	0.546508	3.41114	0.000646915	0.00838269
CDKN2A	ENSG00000147889.17	68.737	-0.618959	0.181464	-3.41092	0.000647435	0.00838269
PSPC1	ENSG00000121390.19	610.244	0.254864	0.0747234	3.41077	0.000647804	0.00838269
RPL36AL	ENSG00000165502.7	1413.08	0.217589	0.0638221	3.4093	0.000651291	0.00842081
FGD4	ENSG00000139132.14	1176.59	-0.276677	0.0812092	-3.40697	0.000656889	0.00848613
TTC13	ENSG00000143643.13	408.862	0.343008	0.100695	3.4064	0.00065825	0.00849667
FAM83D	ENSG00000101447.15	170.761	0.469937	0.137996	3.40544	0.000660573	0.00851959
SLC39A1	ENSG00000143570.18	1835.35	-0.216869	0.0637033	-3.40436	0.000663186	0.0085462
SESN2	ENSG00000130766.5	347.626	-0.311495	0.0915238	-3.40343	0.00066545	0.00856829
YEATS2	ENSG00000163872.16	781.848	0.240835	0.0707859	3.4023	0.00066822	0.00859684
GDI2	ENSG00000057608.17	6073.91	0.153928	0.0452592	3.40103	0.000671313	0.0086295
KIF2C	ENSG00000142945.13	524.084	0.555203	0.163334	3.39919	0.000675862	0.00868081
TRIM68	ENSG00000167333.13	103.187	-0.503519	0.148348	-3.39418	0.000688341	0.0088338
IMPA2	ENSG00000141401.12	260.684	0.687043	0.202444	3.39375	0.000689438	0.00883894
NSDHL	ENSG00000147383.11	370.773	-0.2809	0.0827742	-3.39357	0.000689877	0.00883894
RAC1	ENSG00000136238.18	4391.42	0.134922	0.0397876	3.39106	0.000696219	0.00891286
PPT1	ENSG00000131238.17	6526.84	-0.30215	0.0891203	-3.39037	0.000697995	0.00892826
MEF2C	ENSG00000081189.15	4998.04	-0.155555	0.0458876	-3.38992	0.000699118	0.00893407
PLB1	ENSG00000163803.13	695.718	-0.269961	0.0796407	-3.38974	0.000699597	0.00893407
IGFBP3	ENSG00000146674.15	138.408	0.775141	0.228759	3.38846	0.000702854	0.00896688
ATM	ENSG00000149311.18	2396.01	0.172427	0.0508891	3.38828	0.000703319	0.00896688
PIGQ	ENSG00000007541.16	237.677	-0.38624	0.114038	-3.38694	0.000706762	0.00900341
APOBR	ENSG00000184730.11	635.231	-0.255344	0.0754124	-3.38596	0.000709288	0.00902819
TBC1D9B	ENSG00000197226.12	2111.89	0.199223	0.0588598	3.3847	0.000712573	0.0090626
CTC1	ENSG00000178971.16	262.742	0.333843	0.0986413	3.38442	0.000713299	0.00906443
TIMM44	ENSG00000104980.8	331.547	0.304057	0.0898782	3.38299	0.000717011	0.00910221
TTC9C	ENSG00000162222.14	224.38	0.37105	0.109686	3.38283	0.000717442	0.00910221
B3GALNT2	ENSG00000162885.13	510.377	-0.469391	0.138843	-3.38074	0.000722921	0.00916426
DENND10	ENSG00000119979.18	292.124	0.343556	0.101672	3.37907	0.000727313	0.00921243
FMR1	ENSG00000102081.14	256.745	-0.592129	0.17535	-3.37685	0.000733223	0.00927975
FUT7	ENSG00000180549.8	442.383	0.475722	0.140924	3.37573	0.000736207	0.00930993
PAPSS1	ENSG00000138801.9	730.621	0.285003	0.084444	3.37506	0.000737999	0.00932324
USP18	ENSG00000184979.10	5.45493	4.87349	1.44429	3.37431	0.000740018	0.00932324
ARCN1	ENSG00000095139.14	1708.51	0.21832	0.0647023	3.37422	0.000740254	0.00932324
SLC39A11	ENSG00000133195.11	691.809	-0.238757	0.070777	-3.37337	0.00074255	0.00933999
KIF23	ENSG00000137807.15	449.166	0.52741	0.156407	3.37203	0.000746171	0.00937502
MAPK6	ENSG00000069956.12	634.757	0.3072	0.0911755	3.36932	0.000753531	0.00945985
SRRD	ENSG00000100104.13	256.309	0.371764	0.110376	3.36816	0.000756708	0.00949208
NCKAP5L	ENSG00000167566.17	1117.94	-0.245635	0.072963	-3.36657	0.000761087	0.00953933
AEN	ENSG00000181026.15	719.497	-0.244686	0.072707	-3.36537	0.000764402	0.00957317
SPG21	ENSG00000090487.11	1519.39	-0.164603	0.0489252	-3.36438	0.000767164	0.00960003
EDA	ENSG00000158813.18	76.1285	0.673438	0.2002	3.36382	0.000768719	0.00961176
FAM20C	ENSG00000177706.9	527.583	0.317355	0.0944544	3.35988	0.00077977	0.00973431
IL13RA1	ENSG00000131724.11	4346.99	-0.412699	0.122865	-3.35898	0.00078232	0.00974712
ARPC1B	ENSG00000130429.15	6711.15	-0.210332	0.0626191	-3.35892	0.000782477	0.00974712
MCM10	ENSG00000065328.16	245.989	0.350332	0.104301	3.35885	0.000782675	0.00974712
CORO2A	ENSG00000106789.13	114.34	0.680784	0.202805	3.35684	0.000788393	0.00981048
PTPN13	ENSG00000163629.13	270.746	0.460249	0.13732	3.35165	0.000803313	0.00998812
CYB561	ENSG00000008283.16	15.4541	1.48288	0.442462	3.35143	0.000803952	0.00998812
MTHFD2	ENSG00000065911.12	1780.74	0.174092	0.0519503	3.35113	0.000804836	0.00999113
RTEL1	ENSG00000258366.8	259.382	0.467468	0.139529	3.35033	0.000807144	0.0100118
XAB2	ENSG00000076924.12	284.355	-0.324194	0.0967831	-3.3497	0.000808998	0.0100268
SNX5	ENSG00000089006.16	1921.33	0.171175	0.0511346	3.34753	0.000815348	0.0100967
SCLT1	ENSG00000151466.12	294.855	0.355453	0.10619	3.34733	0.000815933	0.0100967
CD40	ENSG00000101017.14	566.201	-0.303658	0.090757	-3.34583	0.00082036	0.0101434
SETD3	ENSG00000183576.13	1219.98	0.254096	0.0760067	3.34307	0.000828567	0.0102286
CCDC88A	ENSG00000115355.17	4088	0.191611	0.0573698	3.33993	0.000837984	0.0103367
DPEP2	ENSG00000167261.14	56.2746	-0.746924	0.223698	-3.33899	0.000840846	0.0103492
UTRN	ENSG00000152818.18	3171.62	0.164616	0.0493019	3.33895	0.000840965	0.0103492
LIPG	ENSG00000101670.12	125.158	-0.901799	0.270086	-3.33894	0.000840995	0.0103492
HES1	ENSG00000114315.4	13.8944	-1.34326	0.402354	-3.33851	0.000842291	0.010357
NAA20	ENSG00000173418.12	642.032	0.23835	0.0714241	3.33711	0.00084654	0.010401
GRINA	ENSG00000178719.17	1061.2	-0.229728	0.0688527	-3.33651	0.000848367	0.0104152
ZNF320	ENSG00000182986.14	150.44	0.404681	0.121302	3.33615	0.000849464	0.0104205
CKAP2	ENSG00000136108.15	959.171	0.349588	0.104897	3.33269	0.000860113	0.0105428
CLNS1A	ENSG00000074201.9	905.777	0.218059	0.0655236	3.32795	0.000874874	0.0107069
PWWP3A	ENSG00000160953.16	748.037	-0.22148	0.06657	-3.32703	0.000877771	0.0107335
RHBDD2	ENSG00000005486.17	213.496	-0.38153	0.114684	-3.32679	0.000878529	0.0107335
PPM1N	ENSG00000213889.10	166.647	-0.483925	0.145471	-3.3266	0.000879118	0.0107335
NUP42	ENSG00000136243.17	370.982	-0.307145	0.0923415	-3.32618	0.000880442	0.0107405
UMPS	ENSG00000114491.14	416.369	0.300107	0.0902364	3.32578	0.000881709	0.0107405
SNX10	ENSG00000086300.15	586.319	-0.260139	0.0782243	-3.32555	0.000882447	0.0107405
ICAM1	ENSG00000090339.9	1839.47	-0.198857	0.059805	-3.32509	0.000883899	0.0107497
SELENOP	ENSG00000250722.6	604.888	1.22683	0.369123	3.32364	0.000888502	0.0107907
ICA1	ENSG00000003147.19	108.866	1.04332	0.313913	3.32359	0.000888657	0.0107907
PUM3	ENSG00000080608.10	385.849	0.289248	0.0870506	3.32276	0.000891319	0.0108146
MAFK	ENSG00000198517.10	216.972	-0.40225	0.121093	-3.32183	0.000894282	0.0108421
FXN	ENSG00000165060.14	134.539	0.550175	0.165701	3.32029	0.000899243	0.0108938
SUMO2	ENSG00000188612.12	1373.96	0.159475	0.0480351	3.31998	0.000900253	0.0108975
BCL2L13	ENSG00000099968.18	785.262	0.2397	0.0722154	3.31924	0.000902623	0.0109177
CIT	ENSG00000122966.16	445.737	0.55331	0.166776	3.31768	0.000907677	0.0109704
ALDH1L2	ENSG00000136010.14	31.7284	1.0165	0.306466	3.31685	0.000910379	0.0109878
TDRD7	ENSG00000196116.8	469.494	0.292473	0.0881792	3.3168	0.000910535	0.0109878
FAM199X	ENSG00000123575.9	730.599	-0.421668	0.127156	-3.31615	0.000912652	0.0110048
CC2D2A	ENSG00000048342.16	119.016	-0.589761	0.178044	-3.31244	0.000924869	0.0111349
RPA2	ENSG00000117748.10	722.091	0.198751	0.0600404	3.31029	0.000932006	0.0112083
JAK3	ENSG00000105639.19	97.3497	-0.898108	0.271318	-3.31017	0.000932401	0.0112083
TBC1D2B	ENSG00000167202.11	802.338	-0.201754	0.0609716	-3.30897	0.000936388	0.0112475
UBC	ENSG00000150991.15	7850.01	0.253406	0.0766375	3.30656	0.000944489	0.0113361
PLXNC1	ENSG00000136040.9	6521.86	0.114207	0.0345457	3.30597	0.00094647	0.0113511
PSMC6	ENSG00000100519.12	606.922	0.244804	0.0740609	3.30544	0.000948268	0.0113639
ATP5F1B	ENSG00000110955.9	8180.34	0.205745	0.0622564	3.3048	0.00095045	0.0113813
ZNF100	ENSG00000197020.11	252.282	-0.407881	0.123485	-3.30307	0.000956318	0.0114427
IARS1	ENSG00000196305.17	2092.22	0.158317	0.0479473	3.30189	0.000960356	0.0114822
ALDH1A1	ENSG00000165092.13	15.5305	2.56955	0.778423	3.30097	0.000963511	0.0115083
SLCO4A1	ENSG00000101187.16	184.932	0.387718	0.117642	3.29573	0.000981665	0.01171
MPP3	ENSG00000161647.18	74.5014	0.731669	0.222181	3.29312	0.000990817	0.0117831
EIF2AK1	ENSG00000086232.13	952.705	0.191818	0.0582482	3.29312	0.000990826	0.0117831
TNFRSF11A	ENSG00000141655.17	171.037	0.609507	0.185094	3.29296	0.00099138	0.0117831
LANCL2	ENSG00000132434.9	217.159	0.440177	0.133672	3.29296	0.000991383	0.0117831
NAIP	ENSG00000249437.7	3980.47	0.233203	0.0708199	3.29291	0.000991579	0.0117831
CFLAR	ENSG00000003402.20	1414.95	-0.184354	0.0560281	-3.29038	0.00100052	0.0118804
COX5A	ENSG00000178741.12	969.005	0.210065	0.0638637	3.28926	0.0010045	0.0119185
MEST	ENSG00000106484.16	37.6297	1.3711	0.416916	3.28868	0.00100658	0.0119295
CRK	ENSG00000167193.8	1178.02	0.234924	0.071438	3.28851	0.0010072	0.0119295
MED22	ENSG00000148297.16	602.191	-0.331487	0.100806	-3.28836	0.00100772	0.0119295
GPSM2	ENSG00000121957.14	276.694	0.44619	0.135725	3.28746	0.00101094	0.0119584
FCAMR	ENSG00000162897.16	77.7278	-0.522631	0.15913	-3.2843	0.00102238	0.0120845
AMACR	ENSG00000242110.8	327.663	-0.407511	0.124091	-3.28397	0.00102355	0.0120892
ELF2	ENSG00000109381.20	658.184	0.214956	0.0654646	3.28354	0.00102512	0.0120985
S100A13	ENSG00000189171.14	36.3769	-0.815372	0.248527	-3.28082	0.00103504	0.0122064
PLSCR1	ENSG00000188313.13	497.759	-0.63032	0.192181	-3.27982	0.00103874	0.0122408
XPR1	ENSG00000143324.14	725.336	-0.20571	0.0627996	-3.27565	0.00105418	0.0124133
CRAT	ENSG00000095321.17	293.515	0.362954	0.110824	3.27506	0.00105638	0.0124299
TMEM127	ENSG00000135956.8	1214.02	-0.222963	0.0680925	-3.27441	0.00105882	0.0124491
AURKA	ENSG00000087586.17	595.641	0.531039	0.162193	3.27412	0.0010599	0.0124525
THOC3	ENSG00000051596.9	292.742	-0.347861	0.106259	-3.2737	0.00106151	0.0124599
FKBP8	ENSG00000105701.16	1886.17	-0.233957	0.0714693	-3.27353	0.00106214	0.0124599
CREBZF	ENSG00000137504.13	610.183	-0.280483	0.0857023	-3.27275	0.00106506	0.0124848
CACNA2D4	ENSG00000151062.15	430.843	0.281919	0.08618	3.27128	0.00107063	0.0125406
CMTM6	ENSG00000091317.8	2839.46	-0.256818	0.0786689	-3.26455	0.00109638	0.012823
POLQ	ENSG00000051341.14	504.382	0.366353	0.112294	3.26245	0.00110455	0.0129088
ILDR2	ENSG00000143195.13	574.529	0.316487	0.0970543	3.26093	0.00111047	0.0129683
TNF	ENSG00000232810.4	397.802	-0.316792	0.097178	-3.25992	0.00111444	0.0130048
BTN2A2	ENSG00000124508.17	112.458	-0.535214	0.164222	-3.25909	0.0011177	0.0130332
FAM156B	ENSG00000179304.16	63.8519	1.44409	0.443171	3.25855	0.00111982	0.0130481
CENPE	ENSG00000138778.13	452.187	0.527704	0.16196	3.25824	0.00112107	0.0130528
CKLF	ENSG00000217555.12	1954.76	0.205647	0.063154	3.25628	0.00112882	0.0131333
ACSF2	ENSG00000167107.12	250.081	-0.365101	0.112135	-3.2559	0.00113032	0.0131409
CDK6	ENSG00000105810.9	747.04	-0.344135	0.105715	-3.25532	0.00113266	0.0131583
TRIM22	ENSG00000132274.16	1468.02	-0.270809	0.0832136	-3.25438	0.0011364	0.0131919
MKNK2	ENSG00000099875.14	1067.58	-0.196148	0.0602824	-3.25382	0.00113865	0.0132082
DDX21	ENSG00000165732.13	1620.99	0.17679	0.0543434	3.2532	0.00114115	0.0132273
MELK	ENSG00000165304.8	353.305	0.359498	0.1106	3.25042	0.00115235	0.0133273
DHFR	ENSG00000228716.7	980.782	0.253592	0.0780873	3.24755	0.00116405	0.0134526
CDKN3	ENSG00000100526.20	118.533	0.550995	0.169744	3.24604	0.00117021	0.0135139
AUNIP	ENSG00000127423.10	96.4322	0.524659	0.161676	3.24512	0.00117402	0.0135428
UTP14A	ENSG00000156697.13	358.624	-0.329332	0.101489	-3.24501	0.00117446	0.0135428
MLLT10	ENSG00000078403.17	412.098	0.324404	0.0999766	3.2448	0.00117533	0.0135429
PSRC1	ENSG00000134222.16	197.18	0.600034	0.184968	3.24399	0.00117869	0.0135715
RFC4	ENSG00000163918.10	359.2	0.28038	0.0864417	3.24358	0.00118037	0.0135808
C12orf65	ENSG00000130921.8	121.501	0.469305	0.144841	3.24013	0.00119474	0.0137296
TSPAN14	ENSG00000108219.15	2172.68	0.136675	0.0421828	3.24006	0.00119506	0.0137296
HSPA4L	ENSG00000164070.12	28.4355	-1.06216	0.32798	-3.2385	0.0012016	0.0137844
ALMS1	ENSG00000116127.18	590.096	0.294275	0.0908863	3.23784	0.00120439	0.0138062
GPN1	ENSG00000198522.14	438.553	0.268029	0.0828256	3.23606	0.00121192	0.0138822
PALM2AKAP2	ENSG00000157654.19	535.128	-0.379906	0.117414	-3.23561	0.00121382	0.0138844
NDUFS1	ENSG00000023228.14	1836.34	0.165206	0.051059	3.2356	0.00121389	0.0138844
HYAL2	ENSG00000068001.14	344.257	-0.357376	0.110466	-3.23516	0.00121575	0.0138954
HERC5	ENSG00000138646.9	210.393	-0.419643	0.129758	-3.23405	0.00122047	0.0139289
WDFY3	ENSG00000163625.15	2382.96	0.193686	0.0599005	3.23346	0.00122299	0.0139475
MECP2	ENSG00000169057.23	468.3	-0.273104	0.0844913	-3.23234	0.00122782	0.0139923
RAB8A	ENSG00000167461.12	1215.18	0.180317	0.0557911	3.23201	0.00122923	0.0139981
HEXB	ENSG00000049860.14	2373.45	-0.229862	0.0711398	-3.23113	0.00123302	0.0140215
NEIL3	ENSG00000109674.4	66.556	0.581704	0.180032	3.23112	0.00123308	0.0140215
SERAC1	ENSG00000122335.17	153.549	-0.392043	0.121344	-3.23085	0.00123422	0.0140242
NUP85	ENSG00000125450.11	741.916	0.238492	0.0738365	3.23	0.0012379	0.0140557
ECPAS	ENSG00000136813.14	2054.91	0.174782	0.0541248	3.22924	0.00124121	0.0140831
ZNF714	ENSG00000160352.16	389.714	0.300568	0.0930875	3.22888	0.00124278	0.0140906
ZNF275	ENSG00000063587.14	126.627	-0.447566	0.138692	-3.22704	0.00125076	0.0141707
COMMD5	ENSG00000170619.10	492.531	-0.243895	0.075599	-3.22617	0.00125459	0.0142032
RNASE1	ENSG00000129538.14	807.904	1.63663	0.507344	3.22587	0.00125589	0.0142032
GSTO1	ENSG00000148834.13	1001.58	0.268368	0.0832047	3.2254	0.00125796	0.014211
MFGE8	ENSG00000140545.15	33.5373	-0.874015	0.271397	-3.22043	0.00128	0.0144494
SLC30A1	ENSG00000170385.10	885.328	-0.295383	0.0917305	-3.22012	0.00128136	0.0144543
MTRR	ENSG00000124275.15	296.151	0.306683	0.0952506	3.21974	0.00128305	0.0144629
CTTNBP2	ENSG00000077063.11	1147.86	0.283924	0.0882004	3.21908	0.00128601	0.0144857
NES	ENSG00000132688.11	10.4375	-1.82686	0.567849	-3.21715	0.00129469	0.014573
UPRT	ENSG00000094841.14	160.849	-0.415575	0.129184	-3.21692	0.00129575	0.0145744
LGALS12	ENSG00000133317.14	998.955	-0.347558	0.108107	-3.21493	0.00130475	0.014665
TMEM167A	ENSG00000174695.10	1118.8	-0.314947	0.0980181	-3.21315	0.00131289	0.0147459
GTF2A1	ENSG00000165417.12	334.606	-0.347342	0.108115	-3.2127	0.00131494	0.0147582
PSMD7	ENSG00000103035.11	952.759	0.185844	0.0578713	3.21134	0.00132118	0.0148176
IQGAP1	ENSG00000140575.13	8831.87	0.142845	0.0445338	3.20756	0.00133865	0.014992
GNB2	ENSG00000172354.10	1314.15	-0.177316	0.0552897	-3.20704	0.0013411	0.0150086
SNTA1	ENSG00000101400.6	44.3612	0.8336	0.260125	3.20461	0.00135245	0.0151138
UBTD1	ENSG00000165886.5	175.795	-0.432278	0.134973	-3.20271	0.00136142	0.0152031
ENTPD6	ENSG00000197586.13	856.946	-0.202589	0.0632801	-3.20146	0.00136734	0.0152584
ARHGEF37	ENSG00000183111.12	9.38516	1.89119	0.590805	3.20104	0.00136931	0.0152694
TNFSF13B	ENSG00000102524.11	81.4593	-0.570935	0.178392	-3.20045	0.00137211	0.0152897
FTSJ1	ENSG00000068438.15	367.272	-0.281668	0.088046	-3.1991	0.00137856	0.0153505
ARAF	ENSG00000078061.13	622.807	-0.239688	0.0749896	-3.19628	0.00139211	0.0154904
HMGB1	ENSG00000189403.15	2888.75	0.187588	0.058704	3.19548	0.00139598	0.0155223
TREM1	ENSG00000124731.13	7.24699	-2.21171	0.69282	-3.19233	0.00141129	0.0156814
C1QBP	ENSG00000108561.8	1076.62	0.262975	0.0824263	3.19043	0.00142063	0.0157738
SNN	ENSG00000184602.6	638.749	-0.319881	0.100279	-3.18992	0.00142313	0.0157903
MAN2B2	ENSG00000013288.9	704.188	-0.247452	0.077585	-3.18943	0.00142555	0.015806
ZC3H11A	ENSG00000058673.16	1176.98	-0.234765	0.0736541	-3.1874	0.00143556	0.0159056
DDX1	ENSG00000079785.15	648.765	0.262974	0.0825201	3.18678	0.00143866	0.0159286
PTDSS2	ENSG00000174915.12	218.618	-0.373295	0.11715	-3.18646	0.00144026	0.015935
BNIP3L	ENSG00000104765.16	966.504	-0.336913	0.105749	-3.18597	0.0014427	0.0159507
IGSF21	ENSG00000117154.12	6.82741	-3.00408	0.943946	-3.18247	0.00146023	0.0161276
PGBD5	ENSG00000177614.11	473.943	-0.260944	0.0820008	-3.18221	0.00146156	0.0161276
WAS	ENSG00000015285.11	695.968	-0.27324	0.0858661	-3.18216	0.00146181	0.0161276
SLC46A3	ENSG00000139508.14	233.705	-0.540237	0.169804	-3.18153	0.001465	0.0161514
SLC44A1	ENSG00000070214.16	644.996	-0.239147	0.0752064	-3.17988	0.00147336	0.016232
SLC45A4	ENSG00000022567.9	433.095	0.449181	0.141504	3.17433	0.00150182	0.0165282
FBXO5	ENSG00000112029.10	288.928	0.310702	0.0978827	3.17423	0.00150237	0.0165282
TNFRSF10A	ENSG00000104689.10	142.404	-0.540004	0.17016	-3.17352	0.00150605	0.016557
BUB1	ENSG00000169679.15	618.563	0.441042	0.139039	3.17207	0.00151357	0.0166161
NSL1	ENSG00000117697.15	704.074	0.272573	0.0859757	3.17035	0.00152258	0.0166932
YARS1	ENSG00000134684.10	1598.76	0.209712	0.0661487	3.17032	0.00152273	0.0166932
MTM1	ENSG00000171100.14	434.312	-0.263015	0.0830771	-3.16591	0.00154597	0.016936
WARS1	ENSG00000140105.18	686.316	-0.239316	0.0756096	-3.16515	0.00155002	0.0169684
SF3A3	ENSG00000183431.12	1322.49	0.198976	0.0628726	3.16474	0.00155219	0.0169803
EMILIN2	ENSG00000132205.11	351.892	-0.690348	0.218169	-3.16428	0.00155469	0.0169957
BCL2A1	ENSG00000140379.8	24.1854	-1.14214	0.361126	-3.16271	0.00156309	0.0170636
ABCA1	ENSG00000165029.16	1582.46	1.02499	0.324124	3.16234	0.00156508	0.0170733
UBE2F	ENSG00000184182.18	624.254	0.243676	0.0770733	3.16162	0.00156895	0.0171002
H4C15	ENSG00000270276.2	127.608	0.520439	0.164619	3.16147	0.00156974	0.0171002
KIF11	ENSG00000138160.6	792.396	0.3347	0.105908	3.1603	0.00157609	0.0171477
TUBA1B	ENSG00000123416.15	22637.7	0.100975	0.0319577	3.15965	0.00157957	0.0171712
SLC5A6	ENSG00000138074.15	554.057	0.266214	0.0842608	3.15941	0.00158089	0.0171736
CLIC4	ENSG00000169504.15	1228.8	-0.385544	0.122051	-3.15887	0.00158382	0.0171902
PLCD1	ENSG00000187091.13	83.1587	-0.536995	0.170026	-3.15831	0.00158684	0.0172022
MYO5C	ENSG00000128833.13	111.102	0.48332	0.153065	3.15762	0.00159063	0.0172313
PDK4	ENSG00000004799.8	66.6361	1.22409	0.387702	3.1573	0.00159239	0.0172383
ADGRE3	ENSG00000131355.15	666.893	-0.839311	0.265963	-3.15575	0.00160087	0.0173181
SLC20A2	ENSG00000168575.10	461.421	0.312895	0.0991684	3.15519	0.00160393	0.0173391
AC022966.1	ENSG00000055483.19	470.49	-0.25746	0.081615	-3.15456	0.00160738	0.0173644
ACSL1	ENSG00000151726.14	821.875	-0.231685	0.0734553	-3.1541	0.00160994	0.01738
MSX2	ENSG00000120149.9	127.309	-0.486697	0.154349	-3.15322	0.0016148	0.0174203
TNFRSF21	ENSG00000146072.6	169.903	-0.541693	0.171804	-3.15298	0.00161612	0.0174225
USP10	ENSG00000103194.15	1033.91	0.211913	0.0672243	3.15233	0.00161975	0.0174496
PRPS2	ENSG00000101911.12	464.583	-0.418392	0.132757	-3.15157	0.00162396	0.0174828
ELF4	ENSG00000102034.16	513.487	-0.254286	0.0806966	-3.15114	0.00162635	0.0174914
FAM200B	ENSG00000237765.7	179.85	-0.395732	0.125596	-3.15082	0.00162811	0.0174914
TAPBPL	ENSG00000139192.12	238.111	-0.317341	0.100717	-3.15082	0.00162813	0.0174914
MMP25	ENSG00000008516.17	54.6252	0.758725	0.240946	3.14894	0.00163865	0.0175923
SFXN1	ENSG00000164466.13	339.095	0.275172	0.087406	3.14821	0.00164274	0.0176241
CCM2	ENSG00000136280.16	787.798	-0.239917	0.0762242	-3.14752	0.00164664	0.0176481
NOL4L	ENSG00000197183.14	322.115	0.267414	0.0849633	3.14741	0.00164725	0.0176481
HPGD	ENSG00000164120.14	6.66314	-1.93834	0.615988	-3.14671	0.00165117	0.017678
ATXN10	ENSG00000130638.17	721.258	0.227195	0.0722376	3.14511	0.00166024	0.0177548
CHPF2	ENSG00000033100.16	932.281	-0.178312	0.0566964	-3.14504	0.00166063	0.0177548
SAE1	ENSG00000142230.13	1305.71	0.205703	0.0654176	3.14446	0.00166391	0.0177732
C3AR1	ENSG00000171860.5	3657.01	-0.198116	0.0630071	-3.14434	0.00166463	0.0177732
MCM6	ENSG00000076003.5	1150.22	0.240903	0.076624	3.14396	0.0016668	0.0177841
RTN4IP1	ENSG00000130347.13	152.016	0.398422	0.126765	3.14301	0.00167221	0.0178296
KIF15	ENSG00000163808.17	315.833	0.367111	0.116842	3.14195	0.00167827	0.017882
CHST2	ENSG00000175040.6	200.14	-0.513794	0.163551	-3.14149	0.00168088	0.0178857
TMEM35B	ENSG00000243749.1	102.662	-0.490798	0.15624	-3.14132	0.00168191	0.0178857
RNF169	ENSG00000166439.6	716.942	0.226946	0.0722462	3.14129	0.00168206	0.0178857
SLC38A10	ENSG00000157637.13	1480.42	-0.204852	0.0652251	-3.1407	0.00168547	0.017897
TUBB6	ENSG00000176014.13	69.7038	-0.546853	0.174129	-3.1405	0.00168657	0.017897
FYB1	ENSG00000082074.18	2104.96	-0.202229	0.0644047	-3.13997	0.00168967	0.0179138
PWWP2A	ENSG00000170234.13	239.471	0.306881	0.0977381	3.13983	0.00169045	0.0179138
PRR14L	ENSG00000183530.14	1662.92	0.167453	0.0533372	3.13951	0.00169232	0.0179214
CCDC86	ENSG00000110104.13	444.312	0.338803	0.107941	3.13877	0.0016966	0.0179544
NACA	ENSG00000196531.12	5264.55	0.138236	0.0440983	3.13473	0.00172014	0.0181911
CPOX	ENSG00000080819.9	205.211	-0.329264	0.105049	-3.13438	0.00172216	0.0182002
TRNAU1AP	ENSG00000180098.9	233.088	0.355389	0.113421	3.13335	0.00172822	0.0182518
GART	ENSG00000159131.17	987.431	0.188272	0.0601345	3.13085	0.00174299	0.0183953
NFATC2IP	ENSG00000176953.12	467.643	0.245066	0.0783449	3.12804	0.00175978	0.0185474
ABLIM1	ENSG00000099204.20	7.78535	-1.8474	0.590593	-3.12804	0.00175978	0.0185474
SPINT1	ENSG00000166145.14	455.235	0.307705	0.09842	3.12645	0.00176931	0.0186352
RASL11A	ENSG00000122035.6	68.6299	0.797742	0.255278	3.12499	0.00177809	0.018715
DOK1	ENSG00000115325.13	865.396	-0.212852	0.0681375	-3.12386	0.00178497	0.0187747
KMT5A	ENSG00000183955.13	561.302	0.237136	0.0759397	3.12269	0.00179208	0.0188268
MILR1	ENSG00000271605.6	1029.91	0.219615	0.0703298	3.12265	0.00179233	0.0188268
GNAI2	ENSG00000114353.17	10149.3	0.139271	0.0446328	3.12038	0.00180616	0.0189592
TCERG1	ENSG00000113649.11	990.594	0.199093	0.0638443	3.11842	0.00181826	0.0190605
CD59	ENSG00000085063.16	5453.29	-0.115904	0.0371954	-3.11608	0.0018327	0.019199
MAP3K2	ENSG00000169967.16	1674.09	-0.179729	0.0577024	-3.11476	0.00184095	0.0192724
IGFBP4	ENSG00000141753.7	604.752	0.498311	0.160013	3.11419	0.0018445	0.0192966
DCK	ENSG00000156136.10	753.323	-0.234759	0.0754024	-3.11341	0.00184936	0.0193344
CDK5R1	ENSG00000176749.9	43.4207	0.776591	0.249586	3.11152	0.00186126	0.0194458
PSMD5	ENSG00000095261.14	361.374	0.334692	0.107592	3.11075	0.00186614	0.0194747
LEPR	ENSG00000116678.19	77.8465	-0.776379	0.249584	-3.11069	0.00186653	0.0194747
TOMM34	ENSG00000025772.8	500.041	0.273778	0.0881073	3.10732	0.00188791	0.0196846
IER3IP1	ENSG00000134049.6	299.641	-0.451725	0.145409	-3.10659	0.00189258	0.0197201
RHOT1	ENSG00000126858.18	635.879	0.244769	0.078812	3.10573	0.0018981	0.0197511
COX6A1	ENSG00000111775.3	1679.78	0.171984	0.0553929	3.1048	0.00190407	0.0197972
EPAS1	ENSG00000116016.14	174.508	1.34727	0.433954	3.10465	0.00190507	0.0197972
SLC25A43	ENSG00000077713.19	134.916	-0.440618	0.141968	-3.10364	0.00191158	0.0198516
DDX11	ENSG00000013573.17	430.626	-0.288996	0.0931335	-3.10303	0.00191551	0.0198791
MX2	ENSG00000183486.13	13.1712	-1.47228	0.474604	-3.10212	0.00192139	0.0199269
USP39	ENSG00000168883.20	575.871	0.274659	0.0885515	3.10168	0.00192423	0.019943
CLTC	ENSG00000141367.12	11913.7	0.136349	0.0439681	3.10109	0.00192807	0.0199662
EEPD1	ENSG00000122547.11	603.351	0.574177	0.185164	3.10091	0.00192925	0.0199662
NCAPG	ENSG00000109805.10	573.924	0.322815	0.104109	3.10075	0.0019303	0.0199662
TMEM63C	ENSG00000165548.11	30.6538	0.853707	0.275378	3.10013	0.00193436	0.0199908
TARS3	ENSG00000185418.16	135.536	0.484838	0.1564	3.09999	0.00193526	0.0199908
STON2	ENSG00000140022.13	167.465	0.512932	0.165475	3.09975	0.00193682	0.0199937
EIF2S2	ENSG00000125977.7	1472.99	0.234073	0.0755189	3.09953	0.00193827	0.0199954
VPS37B	ENSG00000139722.7	240.271	-0.301436	0.0974045	-3.09468	0.00197027	0.0202986
DEPDC1	ENSG00000024526.17	141.785	0.524982	0.16967	3.09414	0.00197384	0.0203219
EMD	ENSG00000102119.11	209.088	-0.339132	0.109652	-3.09279	0.00198283	0.020401
PSMA2	ENSG00000106588.11	919.394	0.18165	0.0588315	3.08763	0.00201761	0.0207177
DDIT3	ENSG00000175197.12	206.63	-0.384037	0.124412	-3.08681	0.00202316	0.0207611
HERC2	ENSG00000128731.17	1992.22	0.185988	0.0602664	3.0861	0.00202799	0.0207969
NBPF1	ENSG00000219481.10	647.215	0.306944	0.0994825	3.08541	0.00203272	0.0208317
RAB43	ENSG00000172780.16	313.608	-0.422183	0.136866	-3.08465	0.00203789	0.0208709
TRMT61A	ENSG00000166166.13	184.177	-0.382491	0.124021	-3.0841	0.00204172	0.0208964
FBXW11	ENSG00000072803.17	1232.98	0.154063	0.0499659	3.08337	0.00204673	0.0209339
AAK1	ENSG00000115977.19	498.375	0.294864	0.0956692	3.08212	0.00205535	0.0210082
TBC1D8B	ENSG00000133138.20	65.2911	-0.808112	0.262249	-3.08146	0.00205987	0.0210352
CCDC124	ENSG00000007080.11	204.48	-0.427523	0.138746	-3.08134	0.00206068	0.0210352
PTER	ENSG00000165983.14	209.092	-0.376854	0.12239	-3.07911	0.00207617	0.0211672
VDAC1	ENSG00000213585.11	2460.74	0.145814	0.0473562	3.07909	0.00207634	0.0211672
ATP11C	ENSG00000101974.14	603.125	-0.252764	0.0821026	-3.07863	0.00207953	0.0211859
TSKU	ENSG00000182704.8	7.19755	3.85774	1.25333	3.078	0.00208397	0.0212149
ZNF121	ENSG00000197961.11	732.797	-0.2352	0.0764427	-3.07681	0.00209226	0.0212738
MACO1	ENSG00000204178.11	268.397	0.40014	0.130065	3.07647	0.00209464	0.0212842
PCDHGA12	ENSG00000253159.3	30.5148	-1.04516	0.339831	-3.07552	0.00210133	0.0213381
CABYR	ENSG00000154040.20	82.555	0.612079	0.199123	3.07388	0.00211296	0.0214423
PDE7B	ENSG00000171408.14	236.126	0.40251	0.130992	3.07278	0.00212071	0.0215057
PIN4	ENSG00000102309.15	141.268	-0.412885	0.134377	-3.07259	0.00212212	0.0215057
ARHGAP19	ENSG00000213390.11	519.819	0.254492	0.0828314	3.07241	0.00212335	0.0215057
HNRNPAB	ENSG00000197451.12	1244.18	0.193748	0.0630884	3.07106	0.00213301	0.0215895
PHAX	ENSG00000164902.14	467.707	0.248855	0.0811506	3.06659	0.00216519	0.0218867
RXFP1	ENSG00000171509.16	12.5061	1.68072	0.54825	3.06561	0.00217225	0.0219438
AMFR	ENSG00000159461.15	1758.87	-0.197086	0.0643428	-3.06307	0.00219081	0.022117
RUFY3	ENSG00000018189.13	571.615	0.233962	0.0763965	3.06248	0.00219513	0.0221462
LGR4	ENSG00000205213.14	249.687	-0.369521	0.120681	-3.06195	0.00219899	0.0221708
HSD17B10	ENSG00000072506.13	431.015	-0.270909	0.0885011	-3.06108	0.00220541	0.0222099
SGTB	ENSG00000197860.10	255.716	-0.391426	0.127874	-3.06104	0.00220572	0.0222099
ELMOD2	ENSG00000179387.10	276.862	-0.311905	0.101909	-3.06061	0.00220886	0.0222271
HSPA9	ENSG00000113013.15	3250.08	0.168529	0.0550799	3.05972	0.00221547	0.0222792
DNMBP	ENSG00000107554.17	21.6328	-0.92916	0.303754	-3.05892	0.00222137	0.0223241
ILF2	ENSG00000143621.17	1719.56	0.202505	0.0662452	3.05689	0.00223644	0.0224469
EDNRB	ENSG00000136160.17	30.7869	-0.934903	0.305835	-3.05689	0.00223647	0.0224469
MRPL15	ENSG00000137547.9	487.872	0.259327	0.0848768	3.05533	0.0022481	0.0225491
HDAC7	ENSG00000061273.18	182.966	-0.355614	0.116425	-3.05445	0.00225477	0.0226014
PIM2	ENSG00000102096.9	97.8618	-0.509343	0.166829	-3.05309	0.00226496	0.0226887
AKT3	ENSG00000117020.18	87.5667	-0.50266	0.164687	-3.05222	0.00227158	0.022726
LRRC4	ENSG00000128594.8	695.641	0.211394	0.0692658	3.05193	0.00227378	0.0227334
P2RY1	ENSG00000169860.7	138.617	0.415409	0.136182	3.0504	0.00228537	0.0228346
LEPROT	ENSG00000213625.9	845.424	-0.217037	0.0711592	-3.05001	0.00228832	0.0228494
CHIT1	ENSG00000133063.16	79.7011	-0.846366	0.277619	-3.04866	0.00229862	0.0229376
CFD	ENSG00000197766.8	19.2764	1.41088	0.462877	3.04808	0.00230311	0.0229381
CRIP3	ENSG00000146215.13	31.5817	-0.889997	0.291997	-3.04796	0.00230398	0.0229381
ITGAD	ENSG00000156886.12	13.2983	-1.96245	0.643867	-3.04791	0.00230439	0.0229381
PJA1	ENSG00000181191.11	119.97	-0.494116	0.162118	-3.04789	0.00230457	0.0229381
KCTD12	ENSG00000178695.6	9445.73	-0.189252	0.062103	-3.04738	0.00230844	0.0229473
UBE2L3	ENSG00000185651.14	1182.83	0.212554	0.0698044	3.04499	0.00232685	0.0231008
CARD14	ENSG00000141527.18	3.33554	-3.07536	1.01008	-3.04466	0.00232946	0.023112
SNX21	ENSG00000124104.19	39.2956	0.732716	0.240723	3.04382	0.00233598	0.0231471
NCOR1	ENSG00000141027.21	1754.6	0.141479	0.046501	3.04249	0.0023463	0.0232347
BRD2	ENSG00000204256.13	2548.82	0.139153	0.0457515	3.0415	0.002354	0.0232961
SEC14L1	ENSG00000129657.16	1112.21	-0.242663	0.0798281	-3.03982	0.00236723	0.0234121
GABRE	ENSG00000102287.19	353.144	0.292483	0.0962284	3.03947	0.00236995	0.0234242
FAU	ENSG00000149806.11	2885.27	-0.214382	0.0705765	-3.03758	0.00238483	0.0235436
RTRAF	ENSG00000087302.9	874.525	-0.220657	0.0726428	-3.03755	0.00238506	0.0235436
SLC12A5	ENSG00000124140.13	107.171	-0.432117	0.142389	-3.03477	0.00240721	0.0237471
RPL10	ENSG00000147403.16	10481	-0.187693	0.0618949	-3.03245	0.00242577	0.0239151
ETFDH	ENSG00000171503.12	172.653	0.388754	0.128227	3.03177	0.00243122	0.0239537
H2AZ1	ENSG00000164032.12	2457.19	0.247288	0.0816011	3.03046	0.00244184	0.0240431
FPGS	ENSG00000136877.15	387.344	-0.259397	0.0856452	-3.02874	0.00245575	0.0241647
ECI2	ENSG00000198721.12	413.365	0.238374	0.0787786	3.02587	0.0024792	0.0243648
HDDC2	ENSG00000111906.18	233.851	0.326462	0.107989	3.0231	0.00250196	0.024561
IDH3B	ENSG00000101365.21	874.606	0.171931	0.056873	3.02306	0.00250233	0.024561
CECR2	ENSG00000099954.18	154.104	-0.466772	0.154428	-3.02259	0.0025062	0.0245835
GTF2I	ENSG00000263001.6	3720.16	0.251629	0.0833149	3.02021	0.00252599	0.0247487
ZXDC	ENSG00000070476.15	600.614	0.229479	0.0759819	3.02018	0.00252622	0.0247487
UNC5B	ENSG00000107731.12	903.769	-0.189933	0.0629807	-3.01574	0.00256355	0.0250828
ADA	ENSG00000196839.13	106.788	-0.4815	0.159688	-3.01525	0.00256766	0.0251073
PDE3A	ENSG00000172572.6	6.34471	-2.17648	0.721888	-3.01498	0.00256997	0.0251141
COL15A1	ENSG00000204291.11	64.6851	-0.605239	0.200778	-3.01447	0.0025743	0.02514
LYPLAL1	ENSG00000143353.12	199.266	-0.466636	0.154819	-3.01407	0.0025777	0.0251422
SNU13	ENSG00000100138.15	935.861	-0.206674	0.0685774	-3.01374	0.00258051	0.0251539
MR1	ENSG00000153029.14	338.279	-0.371265	0.123231	-3.01276	0.00258882	0.0252191
ARMT1	ENSG00000146476.11	557.865	0.246992	0.0819955	3.01227	0.00259306	0.0252446
ETNK1	ENSG00000139163.16	1206.22	-0.257979	0.0856615	-3.01162	0.00259861	0.0252828
PPHLN1	ENSG00000134283.18	721.719	0.218988	0.0727282	3.01105	0.00260343	0.025304
OAS3	ENSG00000111331.13	236.295	-0.454625	0.150989	-3.01098	0.00260403	0.025304
PC	ENSG00000173599.15	547.065	-0.205648	0.068343	-3.00905	0.00262064	0.0254495
CD86	ENSG00000114013.16	1595.3	0.173962	0.0578292	3.00819	0.00262805	0.0254941
CDC6	ENSG00000094804.12	358.241	0.259422	0.08624	3.00814	0.00262851	0.0254941
SELENOF	ENSG00000183291.17	1128.54	-0.220307	0.0732452	-3.00781	0.0026314	0.0255062
FLVCR1	ENSG00000162769.13	224.113	-0.40709	0.135493	-3.00451	0.00266013	0.0257526
ROCK2	ENSG00000134318.14	568.781	0.220106	0.073284	3.00347	0.00266918	0.0258164
PPP1CB	ENSG00000213639.10	1618.97	-0.227788	0.075844	-3.00337	0.00267003	0.0258164
SCYL1	ENSG00000142186.17	962.834	-0.171866	0.0572318	-3.00298	0.00267352	0.0258341
KRT10	ENSG00000186395.8	57.979	-0.618105	0.205931	-3.00151	0.00268643	0.0259267
SIGLEC7	ENSG00000168995.13	177.431	0.479682	0.159876	3.00034	0.0026968	0.0260105
RPS8	ENSG00000142937.12	6990.09	0.158809	0.0529633	2.99848	0.00271333	0.0261538
GNL1	ENSG00000204590.12	289.58	-0.297132	0.0991692	-2.99622	0.00273354	0.0263323
TARBP1	ENSG00000059588.10	449.35	0.340442	0.113643	2.99573	0.00273792	0.0263582
EIF4H	ENSG00000106682.14	4166.35	0.0981772	0.0327825	2.99481	0.00274617	0.026405
FCGR2B	ENSG00000072694.21	201.602	-0.556176	0.185748	-2.99424	0.00275126	0.0264376
STOM	ENSG00000148175.13	962.683	0.198997	0.0664687	2.99384	0.00275488	0.0264561
ARHGEF10L	ENSG00000074964.17	579.654	-0.243932	0.0815322	-2.99185	0.00277296	0.0266132
PRKCB	ENSG00000166501.14	1652.88	-0.196991	0.0658753	-2.99036	0.00278653	0.026727
MMD	ENSG00000108960.9	525.392	0.560148	0.187364	2.98963	0.0027932	0.026758
CIAPIN1	ENSG00000005194.15	538.447	0.224351	0.0750623	2.98887	0.00280012	0.0268078
LRRK2	ENSG00000188906.16	1651.65	-0.261008	0.0873333	-2.98865	0.00280217	0.0268109
TACC3	ENSG00000013810.19	1114.23	0.25639	0.0858021	2.98815	0.00280671	0.0268379
SENP3-EIF4A1	ENSG00000277957.1	14.6654	1.72739	0.578132	2.98789	0.00280912	0.0268444
PTGER3	ENSG00000050628.20	51.0568	-0.661789	0.221743	-2.98449	0.00284054	0.0271167
RAE1	ENSG00000101146.13	574.279	0.206985	0.069355	2.98443	0.00284109	0.0271167
NAA25	ENSG00000111300.10	552.093	0.209143	0.0701016	2.98343	0.00285037	0.0271885
TIMP3	ENSG00000100234.11	19.6673	-1.57925	0.529375	-2.98324	0.00285214	0.0271888
CSNK1G2	ENSG00000133275.16	1080.65	-0.201971	0.0677509	-2.98109	0.00287228	0.027364
RSRC2	ENSG00000111011.18	713.847	0.196159	0.0658522	2.97877	0.00289404	0.0275545
PPM1A	ENSG00000100614.18	512.195	-0.217133	0.0728982	-2.97857	0.00289595	0.0275557
FABP5	ENSG00000164687.11	383.161	-0.297568	0.0999144	-2.97823	0.00289917	0.0275612
CD4	ENSG00000010610.10	2862.07	-0.174476	0.0585855	-2.97814	0.00290006	0.0275612
SLC46A1	ENSG00000076351.13	1725.08	0.204796	0.0687753	2.97776	0.00290362	0.0275782
UQCR10	ENSG00000184076.13	1257.72	0.224816	0.075515	2.9771	0.00290985	0.0276205
SELENOI	ENSG00000138018.18	386.514	0.296177	0.099499	2.97668	0.00291386	0.0276417
DDX20	ENSG00000064703.12	534.414	0.222462	0.0748105	2.97368	0.00294255	0.0278969
SLC17A9	ENSG00000101194.18	337.742	0.346116	0.116531	2.97018	0.00297629	0.0281825
MAPKAPK2	ENSG00000162889.10	1198.88	-0.166584	0.0561728	-2.96557	0.00302124	0.0285895
RTKN2	ENSG00000182010.11	14.0388	1.36375	0.459888	2.96539	0.00302295	0.0285895
MSL3	ENSG00000005302.19	581.802	-0.267406	0.0901867	-2.96503	0.00302658	0.0286064
VDAC2	ENSG00000165637.13	1271.82	0.221134	0.0746106	2.96384	0.00303826	0.0286994
IGFL3	ENSG00000188624.3	10.3441	-1.73468	0.585453	-2.96297	0.00304686	0.0287632
PKD1	ENSG00000008710.20	413.491	-0.230437	0.0777898	-2.9623	0.00305352	0.0288086
LLGL1	ENSG00000131899.11	336.146	-0.434045	0.146541	-2.96194	0.00305711	0.0288116
PRKCSH	ENSG00000130175.9	1347.18	-0.167358	0.0565038	-2.96189	0.00305754	0.0288116
IRF9	ENSG00000213928.9	288.053	0.285162	0.0963715	2.95899	0.00308648	0.0290667
PDIA3	ENSG00000167004.13	5709.46	0.106302	0.0359416	2.95762	0.00310025	0.0291787
ENO1	ENSG00000074800.16	12965.8	0.13246	0.0447948	2.95704	0.0031061	0.0292132
CLTCL1	ENSG00000070371.16	134.868	0.464466	0.15708	2.95688	0.00310767	0.0292132
RREB1	ENSG00000124782.20	963.938	0.180317	0.0609942	2.9563	0.00311355	0.0292508
OSTM1	ENSG00000081087.15	667.826	-0.277621	0.0939294	-2.95564	0.00312023	0.0292959
SNRNP70	ENSG00000104852.15	1813.47	-0.173091	0.0585883	-2.95436	0.00313317	0.0293784
ZNF524	ENSG00000171443.7	174.644	-0.448913	0.151954	-2.95427	0.00313414	0.0293784
MYH3	ENSG00000109063.15	27.3938	0.985405	0.333559	2.95421	0.00313467	0.0293784
USF2	ENSG00000105698.16	1142.57	-0.217419	0.0736083	-2.95373	0.00313961	0.029405
ARFGAP1	ENSG00000101199.13	723.8	-0.208682	0.0706601	-2.95332	0.00314378	0.029405
GRAMD4	ENSG00000075240.17	1700	0.626435	0.212124	2.95315	0.00314544	0.029405
LXN	ENSG00000079257.8	45.3008	-0.637619	0.215922	-2.95301	0.00314696	0.029405
ZNF721	ENSG00000182903.16	295.267	0.310572	0.105209	2.95197	0.00315758	0.0294865
PLXNA2	ENSG00000076356.7	365.367	-0.278044	0.0942087	-2.95136	0.00316377	0.0295266
H2AC18	ENSG00000203812.2	1913.08	0.357888	0.12134	2.94946	0.00318332	0.0296913
RGS2	ENSG00000116741.8	363.879	-1.00335	0.340383	-2.94772	0.00320128	0.0298409
PIM3	ENSG00000198355.5	294.539	-0.328045	0.111301	-2.94736	0.00320503	0.0298536
CTSD	ENSG00000117984.14	18224.4	-0.357285	0.121228	-2.94722	0.00320648	0.0298536
IRF6	ENSG00000117595.12	13.1179	1.50384	0.510358	2.94664	0.00321248	0.0298917
ITPRIPL2	ENSG00000205730.6	1491.67	-0.203723	0.0691579	-2.94577	0.00322156	0.0299582
ZDHHC18	ENSG00000204160.12	341.266	-0.425292	0.144409	-2.94505	0.00322907	0.0300101
PNRC1	ENSG00000146278.11	1595.36	-0.401706	0.136561	-2.94159	0.00326536	0.0303112
PEX10	ENSG00000157911.10	244.74	-0.291135	0.0989808	-2.94132	0.00326813	0.0303188
IQGAP2	ENSG00000145703.16	1396.81	0.42946	0.146051	2.94049	0.00327698	0.0303828
BZW2	ENSG00000136261.15	615.211	0.235611	0.080137	2.9401	0.00328106	0.0303879
MAP3K5	ENSG00000197442.10	943.727	0.189416	0.0644257	2.94007	0.00328143	0.0303879
SCRIB	ENSG00000180900.20	440.523	-0.287546	0.0978291	-2.93927	0.00328991	0.0304302
NUP50	ENSG00000093000.19	982.581	0.17559	0.0597664	2.93794	0.00330399	0.0305285
MAN2A2	ENSG00000196547.15	990.945	0.303079	0.103162	2.9379	0.00330446	0.0305285
LSM12	ENSG00000161654.10	483.665	0.252193	0.0858935	2.93612	0.0033235	0.0306594
IDH2	ENSG00000182054.9	3875.79	0.125006	0.0425767	2.93602	0.00332454	0.0306594
CHST13	ENSG00000180767.10	23.4961	1.57645	0.537026	2.93551	0.00333	0.0306916
MRPS23	ENSG00000181610.13	409.538	0.276856	0.0943328	2.93488	0.00333672	0.0307354
IRF8	ENSG00000140968.11	4483.77	0.149509	0.0509482	2.93453	0.0033405	0.0307449
MARVELD2	ENSG00000152939.17	19.8547	1.46155	0.498108	2.9342	0.00334405	0.0307449
NFKBIZ	ENSG00000144802.11	941.651	-0.405574	0.13823	-2.93405	0.00334566	0.0307449
GTF2E2	ENSG00000197265.9	320.422	0.301146	0.102667	2.93324	0.00335443	0.0308073
SCAF11	ENSG00000139218.18	2031.91	0.164734	0.0561772	2.9324	0.00336349	0.0308723
INKA1	ENSG00000185614.6	116.844	-0.640384	0.218478	-2.93111	0.00337754	0.030983
AC020915.5	ENSG00000283515.1	7.38038	4.46153	1.5227	2.93001	0.0033895	0.0310744
ENOX2	ENSG00000165675.16	376.102	-0.263071	0.0898022	-2.92945	0.00339558	0.0311118
NEU1	ENSG00000204386.11	1692.6	-0.22858	0.0780938	-2.92699	0.00342263	0.0313412
CORO1A	ENSG00000102879.15	9656.75	-0.120631	0.0412271	-2.92602	0.00343331	0.0314206
STK26	ENSG00000134602.16	207.157	-0.692274	0.236632	-2.92553	0.00343872	0.0314516
CBR4	ENSG00000145439.12	181.069	-0.335491	0.114691	-2.92517	0.00344272	0.0314696
ORMDL1	ENSG00000128699.14	558.425	-0.223457	0.0764183	-2.92412	0.00345427	0.0315567
TCN2	ENSG00000185339.9	67.5295	-0.608918	0.208309	-2.92315	0.00346513	0.0316373
WDR91	ENSG00000105875.14	560.556	-0.380901	0.130336	-2.92245	0.00347288	0.031671
ARPIN	ENSG00000242498.8	1146.61	0.398499	0.13646	2.92026	0.00349734	0.0318754
PEX19	ENSG00000162735.18	716.01	0.251187	0.0860259	2.9199	0.00350142	0.0318939
DCAF12	ENSG00000198876.13	1119.49	0.21657	0.0741831	2.9194	0.00350707	0.0319266
COMMD6	ENSG00000188243.12	528.718	-0.397661	0.136271	-2.91816	0.00352105	0.0320352
DYNLT1	ENSG00000146425.11	265.85	0.324798	0.111366	2.91649	0.00353989	0.0321878
ARL4C	ENSG00000188042.8	490.699	-0.415263	0.142404	-2.91609	0.00354445	0.0322104
ENPP2	ENSG00000136960.12	58.8164	0.630729	0.216334	2.91554	0.00355077	0.0322491
PINK1	ENSG00000158828.8	558.098	-0.274537	0.0942364	-2.91328	0.00357649	0.0324545
PEAK3	ENSG00000188305.6	123.618	0.447103	0.153476	2.91319	0.00357757	0.0324545
CLEC19A	ENSG00000261210.8	12.4591	-1.6168	0.555816	-2.90888	0.00362721	0.0328666
SBNO2	ENSG00000064932.16	553.528	-0.239059	0.0821974	-2.90836	0.00363333	0.0329029
ABCF2	ENSG00000285292.1	204.441	0.440691	0.151535	2.90818	0.00363545	0.0329029
XPOT	ENSG00000184575.12	1543.97	0.196383	0.0675467	2.90736	0.00364495	0.0329697
ZFYVE26	ENSG00000072121.16	1439.63	0.20655	0.0710539	2.90695	0.00364975	0.032994
WBP4	ENSG00000120688.9	163.6	0.351476	0.12105	2.90356	0.00368943	0.0333333
TSC22D4	ENSG00000166925.9	503.783	-0.26609	0.0917269	-2.9009	0.00372099	0.0335989
HGSNAT	ENSG00000165102.15	1210.74	0.203315	0.0701	2.90036	0.00372732	0.0336366
IER3	ENSG00000137331.12	956.171	-0.729347	0.251502	-2.89997	0.00373204	0.0336597
SNX30	ENSG00000148158.17	1240.51	-0.190959	0.0658763	-2.89875	0.00374659	0.0337714
INTS4	ENSG00000149262.17	367.326	0.267147	0.0921776	2.89818	0.00375333	0.0338125
SIL1	ENSG00000120725.13	524.68	-0.313292	0.108138	-2.89714	0.0037658	0.0339053
YWHAB	ENSG00000166913.13	3334.12	-0.143894	0.0496953	-2.89552	0.0037853	0.0340415
H6PD	ENSG00000049239.12	1079.6	-0.332091	0.114711	-2.89504	0.00379116	0.0340622
PHRF1	ENSG00000070047.13	643.82	-0.210524	0.0727208	-2.89497	0.00379198	0.0340622
TMEM64	ENSG00000180694.14	134.113	-0.368327	0.127374	-2.89169	0.00383175	0.0343798
GBA2	ENSG00000070610.14	1042.55	0.249932	0.0864724	2.89031	0.00384859	0.034511
PDS5A	ENSG00000121892.15	2135.04	0.153199	0.053022	2.88934	0.00386051	0.0345979
P4HB	ENSG00000185624.15	5651.66	0.168802	0.0584311	2.8889	0.00386593	0.0346265
TRAF1	ENSG00000056558.11	64.5742	-0.56473	0.195601	-2.88716	0.00388738	0.0347786
PRKAB1	ENSG00000111725.11	449.093	-0.239204	0.0828696	-2.88651	0.00389543	0.0348306
GPRIN3	ENSG00000185477.5	3132.08	-0.340824	0.118144	-2.88483	0.00391629	0.0349971
FANCD2	ENSG00000144554.10	643.386	0.265037	0.0919294	2.88305	0.00393842	0.0351746
MCTP1	ENSG00000175471.19	242.527	-0.285491	0.0990517	-2.88225	0.00394852	0.0352446
MAST4	ENSG00000069020.18	11.1242	-1.40712	0.488325	-2.88152	0.00395756	0.0352714
SDF2L1	ENSG00000128228.5	393.273	-0.261821	0.0908639	-2.88146	0.00395832	0.0352714
RPL29	ENSG00000162244.12	5145.5	-0.245627	0.0852693	-2.8806	0.00396915	0.0353275
RBMX2	ENSG00000134597.16	232.583	-0.316344	0.10983	-2.88032	0.00397276	0.0353394
AIMP2	ENSG00000106305.10	338.582	0.331944	0.115269	2.87973	0.00398017	0.0353851
BMF	ENSG00000104081.14	1974.57	-0.298228	0.103593	-2.87884	0.00399142	0.0354648
RANBP2	ENSG00000153201.16	4853.01	0.12906	0.044838	2.87837	0.00399733	0.0354971
SCRN1	ENSG00000136193.17	1965.84	0.24255	0.0843075	2.87697	0.00401511	0.0356347
PSMD1	ENSG00000173692.13	1738.96	0.150873	0.0524514	2.87643	0.00402203	0.0356599
H1-0	ENSG00000189060.5	853.984	0.185238	0.0644583	2.87376	0.00405615	0.0359216
HDAC6	ENSG00000094631.21	1067.85	-0.203441	0.0707937	-2.87372	0.00405667	0.0359216
LPXN	ENSG00000110031.12	1892.99	-0.210289	0.0732173	-2.87212	0.00407731	0.0360838
MRPL39	ENSG00000154719.13	228.889	0.31316	0.109058	2.87151	0.00408518	0.036133
CFP	ENSG00000126759.13	17.1601	-1.26865	0.44185	-2.87122	0.00408893	0.0361456
MRO	ENSG00000134042.13	15.4425	1.54518	0.538273	2.87062	0.0040967	0.0361937
RPL18	ENSG00000063177.13	4391.47	-0.190072	0.0662256	-2.87006	0.00410391	0.0362369
TRPV4	ENSG00000111199.11	216.743	-0.319747	0.11146	-2.86871	0.00412144	0.036371
ZNF486	ENSG00000256229.8	43.1723	-0.669321	0.233397	-2.86773	0.00413424	0.0364555
TPP2	ENSG00000134900.12	1957.88	0.156873	0.0547048	2.86762	0.0041357	0.0364555
FN3KRP	ENSG00000141560.15	214.363	0.323665	0.112891	2.86707	0.00414293	0.0364985
RPF2	ENSG00000197498.13	195.675	0.341031	0.118997	2.86588	0.00415847	0.0366119
IL6R	ENSG00000160712.13	7434.54	0.091718	0.0320051	2.86573	0.0041605	0.0366119
SIGLEC10	ENSG00000142512.15	2678.55	-0.253331	0.0884286	-2.86481	0.00417257	0.0366795
IFNGR2	ENSG00000159128.14	2121.25	0.213292	0.0745051	2.86278	0.00419942	0.0368919
ISG15	ENSG00000187608.10	67.3958	-0.584528	0.204228	-2.86213	0.00420806	0.0369469
FOXO3	ENSG00000118689.15	1125.13	-0.224998	0.0786247	-2.86168	0.00421407	0.036958
C1GALT1C1	ENSG00000171155.8	283.363	-0.390461	0.136462	-2.86132	0.00421881	0.0369787
FAM214A	ENSG00000047346.12	234.669	-0.4052	0.141645	-2.86067	0.00422746	0.0370284
CYBA	ENSG00000051523.11	4281.64	-0.216949	0.0758437	-2.86048	0.00422998	0.0370284
NAA38	ENSG00000183011.13	388.15	0.27949	0.0977114	2.86036	0.00423161	0.0370284
PEPD	ENSG00000124299.15	1325.19	-0.217055	0.0758897	-2.86014	0.00423456	0.0370334
NBEAL1	ENSG00000144426.18	370.875	0.284412	0.0994866	2.85879	0.00425255	0.03715
STARD4	ENSG00000164211.13	598.219	-0.485082	0.169681	-2.85879	0.00425267	0.03715
SLC25A22	ENSG00000177542.11	65.4472	-0.548742	0.192125	-2.85617	0.00428783	0.0374361
SH3BP1	ENSG00000100092.23	1483.3	0.155921	0.0546217	2.85456	0.0043097	0.037606
ZNF329	ENSG00000181894.15	50.7916	-0.67787	0.237673	-2.85211	0.00434305	0.0378545
FBL	ENSG00000105202.9	484.586	0.407991	0.143093	2.85124	0.00435498	0.0379065
GUK1	ENSG00000143774.16	938.139	-0.304512	0.106803	-2.85115	0.0043562	0.0379065
CBX7	ENSG00000100307.13	131.119	-0.472253	0.165637	-2.85114	0.00435631	0.0379065
KIF21A	ENSG00000139116.18	72.0272	0.81591	0.286211	2.85073	0.00436196	0.0379157
POP1	ENSG00000104356.11	178.743	0.414235	0.14531	2.8507	0.00436224	0.0379157
ZNF124	ENSG00000196418.12	1093.77	0.188586	0.0661671	2.85015	0.00436987	0.0379419
RNF123	ENSG00000164068.16	333.287	-0.266558	0.0935248	-2.85013	0.00437013	0.0379419
TBC1D12	ENSG00000108239.9	1257.79	0.171044	0.0600391	2.84888	0.00438729	0.0380696
IVNS1ABP	ENSG00000116679.16	4588.36	0.16746	0.0587882	2.84853	0.00439212	0.0380904
RPS27L	ENSG00000185088.14	666.286	-0.416205	0.146168	-2.84745	0.00440715	0.0381994
TMEM259	ENSG00000182087.14	1448.63	-0.175161	0.0615597	-2.84538	0.00443589	0.0384271
SMC2	ENSG00000136824.19	1275.66	0.246595	0.0867015	2.84418	0.0044526	0.0385504
FTSJ3	ENSG00000108592.17	722.856	0.205891	0.072415	2.84321	0.00446619	0.0386465
PRICKLE3	ENSG00000012211.13	94.9802	-0.468821	0.164975	-2.84176	0.00448648	0.0388005
NT5DC2	ENSG00000168268.11	2323.38	0.216269	0.0761154	2.84133	0.00449265	0.0388323
NFKB1	ENSG00000109320.13	692.553	-0.214362	0.0754541	-2.84096	0.00449774	0.0388547
FAM13A	ENSG00000138640.15	179.388	0.358922	0.1264	2.83958	0.00451733	0.0390024
BAZ1B	ENSG00000009954.11	1503.09	0.16698	0.0588299	2.83835	0.00453477	0.0391313
CACFD1	ENSG00000160325.14	163.7	-0.344676	0.121461	-2.83774	0.00454341	0.0391841
WNT5B	ENSG00000111186.13	33.6904	-0.909675	0.320616	-2.83727	0.00455014	0.0392204
RING1	ENSG00000204227.5	278.7	0.319973	0.11279	2.8369	0.00455539	0.0392359
PLK1	ENSG00000166851.15	313.46	0.554483	0.195462	2.83679	0.00455697	0.0392359
MAST2	ENSG00000086015.22	492.019	-0.294852	0.103999	-2.83514	0.00458062	0.0393978
EIF3A	ENSG00000107581.13	3697.32	0.142573	0.050288	2.83512	0.00458085	0.0393978
SELPLG	ENSG00000110876.9	1769.29	0.188921	0.0666424	2.83484	0.00458484	0.0394028
JADE2	ENSG00000043143.20	476.493	-0.249546	0.0880319	-2.83473	0.00458649	0.0394028
SENP7	ENSG00000138468.16	271.449	-0.323461	0.114118	-2.83444	0.0045906	0.0394054
TCF12	ENSG00000140262.17	1175.8	0.232278	0.0819511	2.83435	0.00459185	0.0394054
AC011511.1	ENSG00000167807.15	16.1688	1.2455	0.439477	2.83404	0.00459636	0.0394223
MPP6	ENSG00000105926.15	36.1266	-0.900085	0.317675	-2.83335	0.00460627	0.0394856
MXD4	ENSG00000123933.17	1224.01	-0.247621	0.0874017	-2.83314	0.00460929	0.0394897
IL2RG	ENSG00000147168.12	56.2229	-0.602791	0.212815	-2.83246	0.00461912	0.0395522
SMAD5	ENSG00000113658.18	536.483	-0.239828	0.0846798	-2.83218	0.00462317	0.0395651
AGRN	ENSG00000188157.15	77.8499	-0.573102	0.202593	-2.82883	0.00467187	0.0399551
XRRA1	ENSG00000166435.15	31.6842	-0.825357	0.291781	-2.82869	0.00467387	0.0399551
RHOQ	ENSG00000119729.12	995.301	-0.270775	0.0957352	-2.82837	0.00467853	0.0399658
ZFY	ENSG00000067646.12	79.2625	9.71392	3.43463	2.82823	0.00468061	0.0399658
GPR27	ENSG00000170837.3	6.70404	2.12596	0.751732	2.82808	0.00468283	0.0399658
ADARB2	ENSG00000185736.16	4.55187	-2.53337	0.896134	-2.827	0.00469864	0.0400788
ITGB1	ENSG00000150093.19	4206.65	-0.151294	0.0535277	-2.82646	0.00470656	0.0401243
NUP98	ENSG00000110713.17	1980.93	0.156062	0.0552328	2.82553	0.00472027	0.0402192
YY1AP1	ENSG00000163374.19	687.629	0.189509	0.0670862	2.82486	0.00473014	0.0402812
ASGR1	ENSG00000141505.12	14.6486	1.26001	0.446093	2.82454	0.00473489	0.0402917
DOHH	ENSG00000129932.10	120.471	-0.376949	0.13346	-2.82443	0.00473655	0.0402917
CHURC1	ENSG00000258289.8	628.236	-0.294654	0.104374	-2.82305	0.00475686	0.0404424
ACTA2	ENSG00000107796.13	5.97426	-2.59972	0.921246	-2.82196	0.00477311	0.0405363
RPL7L1	ENSG00000146223.15	2008.5	0.14167	0.0502296	2.82044	0.00479583	0.0407028
LMBR1	ENSG00000105983.22	360.124	-0.302259	0.107177	-2.82019	0.00479954	0.0407028
C16orf58	ENSG00000140688.17	518.312	-0.237607	0.0843568	-2.81669	0.00485215	0.0410964
LRRC37B	ENSG00000185158.12	106.401	0.442798	0.157205	2.81668	0.00485227	0.0410964
GP9	ENSG00000169704.4	2.81057	3.9001	1.38521	2.81553	0.00486964	0.0412212
SON	ENSG00000159140.21	3288.7	0.156882	0.055728	2.81513	0.00487576	0.0412505
SPRYD4	ENSG00000176422.14	165.301	0.363066	0.129001	2.81445	0.00488608	0.0413154
C1QB	ENSG00000173369.16	7119.07	0.280952	0.0998469	2.81382	0.00489559	0.0413598
CYB5R1	ENSG00000159348.13	736.948	-0.175058	0.0622152	-2.81376	0.00489664	0.0413598
PTGS1	ENSG00000095303.17	3859.39	-0.254892	0.0906057	-2.8132	0.00490514	0.0414091
C2CD5	ENSG00000111731.12	625.906	-0.2261	0.0804271	-2.81124	0.00493517	0.04164
ZNF274	ENSG00000171606.18	270.408	-0.298981	0.106373	-2.81068	0.00494369	0.0416893
TRAPPC6A	ENSG00000007255.10	245.535	-0.332627	0.118367	-2.81015	0.00495188	0.0417358
SERP1	ENSG00000120742.11	1713.47	-0.309519	0.110196	-2.80881	0.00497245	0.0418664
ZNF687	ENSG00000143373.18	712.408	-0.208391	0.0741924	-2.80879	0.00497276	0.0418664
UPK3BL1	ENSG00000267368.1	157.704	0.838224	0.298501	2.80811	0.0049833	0.0419098
TLNRD1	ENSG00000140406.4	419.483	-0.2697	0.0960817	-2.80699	0.0050007	0.0420334
HADHA	ENSG00000084754.12	3706.25	0.152231	0.0542545	2.80588	0.00501801	0.0421562
SCAMP2	ENSG00000140497.16	3098.79	-0.116169	0.0414058	-2.80562	0.00502204	0.0421673
HSD17B7	ENSG00000132196.14	288.368	-0.289823	0.10333	-2.80484	0.0050342	0.0422466
POLDIP3	ENSG00000100227.18	870.913	0.172681	0.0615718	2.80455	0.00503862	0.0422609
NCAPH	ENSG00000121152.10	551.271	0.48016	0.171399	2.80142	0.00508776	0.0426271
KLHL9	ENSG00000198642.7	578.557	-0.215629	0.0770189	-2.79969	0.0051151	0.0428332
TAB3	ENSG00000157625.15	212.229	-0.319301	0.114082	-2.79887	0.00512815	0.0429113
ADGRE2	ENSG00000127507.18	460.449	-0.519198	0.18551	-2.79876	0.00512995	0.0429113
CCT5	ENSG00000150753.12	2407.94	0.201226	0.0719293	2.79755	0.00514912	0.0430254
BCAT2	ENSG00000105552.15	239.53	0.302247	0.108159	2.79446	0.00519857	0.043392
USP25	ENSG00000155313.15	564.346	0.203371	0.0728078	2.79326	0.00521801	0.0435309
CREBRF	ENSG00000164463.12	351.987	-0.280835	0.100566	-2.79254	0.00522961	0.0435824
NPIPB11	ENSG00000254206.5	3.26912	-3.18032	1.13887	-2.79253	0.00522978	0.0435824
SDC1	ENSG00000115884.11	5.02206	-2.12028	0.75986	-2.79036	0.00526499	0.0438273
CD6	ENSG00000013725.14	25.2952	-0.867073	0.310757	-2.7902	0.00526761	0.0438273
SYNDIG1	ENSG00000101463.6	194.131	0.362401	0.129892	2.79001	0.00527057	0.0438285
CCDC170	ENSG00000120262.10	154.569	0.446605	0.160142	2.78881	0.00529028	0.0439689
VCL	ENSG00000035403.17	357.935	-0.299974	0.107581	-2.78835	0.00529772	0.0440073
RAB20	ENSG00000139832.5	280.982	-0.25854	0.0927312	-2.78806	0.00530246	0.0440231
FAM114A1	ENSG00000197712.12	186.733	0.315598	0.113228	2.78728	0.00531519	0.0441053
ZNF506	ENSG00000081665.14	67.4334	-0.625412	0.224415	-2.78686	0.00532217	0.0441397
ATP13A2	ENSG00000159363.18	122.662	-0.386473	0.138758	-2.78523	0.00534895	0.0443355
FLCN	ENSG00000154803.13	742.078	-0.215331	0.0773376	-2.7843	0.00536437	0.0444112
SPRY2	ENSG00000136158.12	1081.27	0.167229	0.0600641	2.78418	0.00536631	0.0444112
ARPC5	ENSG00000162704.16	3492.05	-0.277499	0.099699	-2.78337	0.00537974	0.0444986
DOP1B	ENSG00000142197.12	529.218	-0.217011	0.0779892	-2.78258	0.00539286	0.0445494
VOPP1	ENSG00000154978.13	2760.75	-0.257241	0.0924493	-2.78251	0.0053941	0.0445494
KPNB1	ENSG00000108424.10	3690.65	0.125954	0.0452669	2.78248	0.00539447	0.0445494
ARFIP1	ENSG00000164144.16	745.974	-0.192026	0.0690617	-2.7805	0.00542756	0.0447752
IMMT	ENSG00000132305.20	1436.4	0.181783	0.0654306	2.77826	0.00546516	0.0450615
GAPT	ENSG00000175857.8	1161.69	-0.445206	0.160266	-2.77792	0.00547086	0.0450846
KMT2C	ENSG00000055609.18	1965.94	0.195777	0.0705225	2.77609	0.00550175	0.0453152
MAPK1	ENSG00000100030.14	2640.19	0.111137	0.0400705	2.77353	0.00554512	0.0456241
CARD16	ENSG00000204397.8	100.394	0.714455	0.257641	2.77307	0.00555309	0.0456416
S100A6	ENSG00000197956.10	822.873	-0.342535	0.123524	-2.77303	0.00555363	0.0456416
MEF2A	ENSG00000068305.17	3061.32	0.116753	0.0421052	2.77289	0.00555603	0.0456416
PUS7	ENSG00000091127.14	215.819	0.299424	0.108082	2.77035	0.00559954	0.0459747
MRPL47	ENSG00000136522.14	396.383	0.332529	0.120041	2.77014	0.0056033	0.0459813
ADD1	ENSG00000087274.17	1597.79	0.127652	0.0460899	2.76962	0.00561219	0.04603
CLASP2	ENSG00000163539.17	1029.76	0.157184	0.0567773	2.76842	0.0056328	0.0461747
HDAC9	ENSG00000048052.21	442.56	0.227506	0.0821909	2.76802	0.00563978	0.0462076
CFAP410	ENSG00000160226.16	311.601	-0.310739	0.112272	-2.76774	0.00564462	0.046223
PECAM1	ENSG00000261371.6	4168.35	-0.153888	0.055634	-2.76608	0.00567344	0.0464178
ZNF804A	ENSG00000170396.8	67.1141	-0.503957	0.182195	-2.76603	0.00567438	0.0464178
WFS1	ENSG00000109501.14	212.574	-0.315751	0.114186	-2.76525	0.00568795	0.0465044
DSC2	ENSG00000134755.17	127.26	0.501734	0.181493	2.76449	0.00570121	0.0465883
LPCAT1	ENSG00000153395.10	523.961	0.296688	0.10733	2.76426	0.00570521	0.0465966
ZER1	ENSG00000160445.11	310.821	-0.263279	0.0952624	-2.76373	0.00571453	0.0466482
BID	ENSG00000015475.18	1639.25	0.178864	0.0647242	2.76347	0.00571896	0.0466599
C9orf72	ENSG00000147894.17	328.644	-0.254914	0.0922733	-2.7626	0.00573432	0.0467381
FUCA1	ENSG00000179163.11	7054	0.662355	0.239795	2.76217	0.00574186	0.0467731
LRRC37A	ENSG00000176681.14	64.7361	-0.588038	0.213003	-2.7607	0.00576772	0.0469593
SYT15	ENSG00000204176.14	54.3157	1.19014	0.431276	2.75958	0.00578755	0.0470961
RAB2A	ENSG00000104388.15	590.07	-0.226946	0.0822914	-2.75784	0.00581853	0.0473235
LTV1	ENSG00000135521.9	349.756	0.251084	0.0910656	2.75718	0.00583019	0.0473688
STXBP1	ENSG00000136854.21	116.612	0.437358	0.15868	2.75622	0.00584743	0.0474535
FZD7	ENSG00000155760.2	21.9052	-1.01576	0.368553	-2.75609	0.00584977	0.0474535
RCN3	ENSG00000142552.8	516.93	-0.281865	0.1023	-2.75528	0.00586416	0.0475455
MCFD2	ENSG00000180398.13	857.817	0.217631	0.0790087	2.75452	0.00587788	0.0476072
TNFSF9	ENSG00000125657.5	2.76899	-3.15958	1.14725	-2.75405	0.00588632	0.0476507
SMOC1	ENSG00000198732.10	28.034	1.4155	0.514119	2.75325	0.00590072	0.0477425
SDK2	ENSG00000069188.17	8.09103	-1.54163	0.560172	-2.75207	0.00592197	0.04788
NCL	ENSG00000115053.16	4501.42	0.118473	0.0430502	2.75197	0.00592388	0.04788
GGA2	ENSG00000103365.15	3139.13	0.12989	0.0472284	2.75026	0.00595488	0.0480557
MYCBP	ENSG00000214114.9	342.047	0.247625	0.0900641	2.74943	0.00596994	0.0481368
SF3B3	ENSG00000189091.13	2269.28	0.168155	0.0611645	2.74922	0.00597373	0.0481368
MYO5A	ENSG00000197535.14	2399.85	0.235232	0.0855639	2.74919	0.0059742	0.0481368
LRRC59	ENSG00000108829.10	1754.28	0.14998	0.0545697	2.74842	0.00598835	0.0482259
AC068580.4	ENSG00000250644.3	104.552	-0.526436	0.191634	-2.74709	0.00601273	0.0483972
ARSD	ENSG00000006756.16	893.63	-0.623713	0.227113	-2.74626	0.00602783	0.0484937
KIF18A	ENSG00000121621.7	141.226	0.420333	0.153068	2.74605	0.00603167	0.0484995
AKAP10	ENSG00000108599.15	792.539	0.170173	0.0620157	2.74403	0.00606896	0.0487742
SUPT16H	ENSG00000092201.10	2243.82	0.174188	0.0634903	2.74354	0.00607809	0.0488184
ZBED6	ENSG00000257315.2	971.184	0.328454	0.119725	2.7434	0.00608073	0.0488184
PAK4	ENSG00000130669.17	63.5257	-0.556165	0.202818	-2.74219	0.00610308	0.0489725
MROH6	ENSG00000204839.9	43.9699	-0.736156	0.268534	-2.74139	0.00611796	0.0490666
ZWINT	ENSG00000122952.17	668.438	0.281173	0.102587	2.74082	0.00612862	0.0491268
KIF18B	ENSG00000186185.14	183.78	0.446604	0.162967	2.74046	0.00613526	0.0491547
TEX264	ENSG00000164081.12	1017.36	-0.154598	0.0564494	-2.73871	0.00616811	0.0493925
MTUS1	ENSG00000129422.14	1922.23	0.126788	0.0463087	2.73788	0.00618364	0.0494914
HMGN2	ENSG00000198830.11	4522.76	0.21754	0.0794888	2.73673	0.0062053	0.0496392
VCAN	ENSG00000038427.16	5.46839	-1.83034	0.669071	-2.73564	0.00622598	0.0497791
HPRT1	ENSG00000165704.15	142.831	-0.465693	0.170269	-2.73505	0.00623714	0.0498427
PTPRS	ENSG00000105426.16	4.66131	-1.96713	0.719372	-2.73451	0.00624729	0.0498982
LYSMD2	ENSG00000140280.14	90.0505	-0.529572	0.193757	-2.73318	0.0062726	0.050049
MAEA	ENSG00000090316.16	668.818	0.20723	0.0758614	2.73169	0.00630106	0.0502504
AFDN	ENSG00000130396.20	750.784	-0.191878	0.0702622	-2.73088	0.00631655	0.0503238
FAM162A	ENSG00000114023.15	305.842	0.264339	0.0967966	2.73087	0.00631674	0.0503238
TMTC2	ENSG00000179104.9	67.7253	0.592441	0.216988	2.73029	0.00632777	0.0503859
GLYR1	ENSG00000140632.17	1264.84	0.14923	0.0546701	2.72964	0.0063404	0.0504607
AMIGO2	ENSG00000139211.6	31.414	0.820824	0.300999	2.727	0.00639127	0.0508313
FAAP100	ENSG00000185504.17	432.08	-0.210074	0.0770382	-2.72689	0.00639351	0.0508313
STX10	ENSG00000104915.15	428.865	-0.273175	0.10022	-2.72576	0.0064154	0.0509793
EGR1	ENSG00000120738.8	264.07	0.593268	0.217706	2.72509	0.00642837	0.0510564
NPIPA5	ENSG00000183793.14	35.9118	0.842976	0.309378	2.72474	0.00643521	0.0510846
ACTL6A	ENSG00000136518.17	526.081	0.270242	0.0992789	2.72205	0.00648792	0.0514514
DDB1	ENSG00000167986.14	5782.42	0.0926701	0.0340444	2.72204	0.00648803	0.0514514
POLR2J3	ENSG00000285437.1	158.227	1.87725	0.690099	2.72026	0.00652307	0.0516757
UBXN1	ENSG00000162191.13	901.449	-0.172591	0.0634501	-2.7201	0.00652612	0.0516757
GTF2IRD2	ENSG00000196275.14	81.1734	0.740447	0.272213	2.7201	0.00652627	0.0516757
MRPL35	ENSG00000132313.15	531.037	0.345736	0.127135	2.71944	0.0065393	0.0517051
TTC3	ENSG00000182670.13	3089.96	0.153631	0.056494	2.71943	0.00653952	0.0517051
SLC29A3	ENSG00000198246.9	295.66	-0.263054	0.0967345	-2.71934	0.00654124	0.0517051
TUSC2	ENSG00000114383.10	363.856	-0.235507	0.0866076	-2.71924	0.00654327	0.0517051
TMEM19	ENSG00000139291.14	948.28	-0.215786	0.0793616	-2.71902	0.00654749	0.0517122
COPRS	ENSG00000172301.11	345.156	-0.238287	0.0876882	-2.71743	0.00657907	0.0519353
PPP2R1B	ENSG00000137713.16	410.168	0.230145	0.0847407	2.71588	0.00661008	0.0521537
PANK1	ENSG00000152782.16	179.576	0.397193	0.146269	2.7155	0.00661764	0.0521868
MAP3K4	ENSG00000085511.20	555.468	0.191756	0.0706246	2.71515	0.0066246	0.0521895
EPB41L3	ENSG00000082397.17	1616.23	0.279117	0.102802	2.71511	0.00662543	0.0521895
C17orf49	ENSG00000258315.5	397.401	-0.257597	0.0948801	-2.71498	0.00662804	0.0521895
NCAPD2	ENSG00000010292.13	1881.68	0.195168	0.0718913	2.71477	0.00663225	0.0521962
RHPN2	ENSG00000131941.8	171.213	0.370594	0.136559	2.71381	0.00665146	0.052321
PNPLA4	ENSG00000006757.12	87.3607	-0.717652	0.264487	-2.71338	0.00666015	0.0523629
TCP1	ENSG00000120438.12	1710.54	0.160491	0.0591517	2.71321	0.00666352	0.052363
NOP56	ENSG00000101361.17	1372.67	0.190762	0.0703352	2.71218	0.0066842	0.0524989
AC022826.2	ENSG00000258677.2	40.1995	0.817235	0.301406	2.71141	0.00669979	0.0525948
MINPP1	ENSG00000107789.16	154.322	-0.341656	0.126028	-2.71096	0.00670888	0.0526131
TAL1	ENSG00000162367.11	1956.52	0.146409	0.0540291	2.70982	0.00673196	0.0527676
IWS1	ENSG00000163166.15	848.67	0.215197	0.0794271	2.70937	0.00674118	0.0528132
PNPLA2	ENSG00000177666.17	156.315	-0.351621	0.129793	-2.70909	0.00674691	0.0528315
PIN1	ENSG00000127445.13	459.227	-0.212064	0.0782886	-2.70874	0.0067539	0.0528597
SEPSECS	ENSG00000109618.12	269.645	-0.306348	0.113124	-2.70806	0.0067677	0.0529411
HPDL	ENSG00000186603.6	13.1044	1.44626	0.534094	2.70787	0.00677168	0.0529456
RAD54B	ENSG00000197275.14	81.0381	0.496439	0.183409	2.70674	0.00679481	0.0530998
EIF3L	ENSG00000100129.18	5488.38	0.115822	0.0428014	2.70602	0.00680942	0.0531873
SYTL3	ENSG00000164674.15	42.3006	-0.697514	0.257942	-2.70415	0.00684795	0.0534614
GTF2IRD1	ENSG00000006704.10	33.9935	0.839839	0.3106	2.70392	0.00685265	0.0534712
RB1CC1	ENSG00000023287.13	621.969	-0.321294	0.118873	-2.70283	0.00687528	0.053621
GPR65	ENSG00000140030.6	829.771	-0.262896	0.0973241	-2.70124	0.0069081	0.0538212
FNTA	ENSG00000168522.13	975.194	0.174628	0.0646511	2.70109	0.00691132	0.0538212
HNRNPK	ENSG00000165119.21	5997.96	0.114711	0.0424752	2.70066	0.00692025	0.0538637
EXOSC10	ENSG00000171824.14	795.351	0.204249	0.075652	2.69985	0.00693705	0.0539675
DDX10	ENSG00000178105.11	276.026	0.281458	0.104277	2.69913	0.00695214	0.0540579
KIF22	ENSG00000079616.12	806.394	0.227992	0.0844827	2.69869	0.00696139	0.0541028
ACTR8	ENSG00000113812.14	510.505	-0.242025	0.0896921	-2.6984	0.00696731	0.0541218
OR2W3	ENSG00000238243.3	6.76893	1.96132	0.727547	2.6958	0.00702207	0.0545199
RNF11	ENSG00000123091.5	485.144	-0.264854	0.0982623	-2.69538	0.00703087	0.0545611
POLR2C	ENSG00000102978.13	650.55	0.199379	0.0739774	2.69514	0.00703601	0.0545737
FAM53B	ENSG00000189319.14	1672.18	-0.130235	0.0483527	-2.69343	0.00707203	0.0548258
FBXL15	ENSG00000107872.12	184.596	-0.316075	0.117419	-2.69187	0.00710534	0.0550567
ISCU	ENSG00000136003.15	757.556	-0.243736	0.0905562	-2.69154	0.00711229	0.0550831
FPGT	ENSG00000254685.6	192.404	-0.42431	0.157738	-2.68997	0.0071459	0.0553158
ALS2	ENSG00000003393.15	313.715	0.294561	0.109546	2.68891	0.00716853	0.0554635
APOL2	ENSG00000128335.14	270.518	-0.251002	0.0933733	-2.68816	0.00718476	0.055548
LRRC37A3	ENSG00000176809.10	33.7379	-0.806521	0.300052	-2.68794	0.00718951	0.055548
PICALM	ENSG00000073921.18	3340.17	-0.199916	0.074376	-2.68791	0.00719016	0.055548
GBA	ENSG00000177628.16	1174.54	-0.254625	0.0948134	-2.68554	0.00724125	0.0559149
LZTS2	ENSG00000107816.17	271.864	-0.318047	0.118474	-2.68453	0.00726322	0.0560568
PTPRCAP	ENSG00000213402.3	159.709	0.740079	0.275718	2.68419	0.00727063	0.0560584
NLGN4Y	ENSG00000165246.14	56.1654	9.21695	3.43483	2.68338	0.00728822	0.0561662
ZFP36L2	ENSG00000152518.8	1484.04	0.242117	0.0902453	2.68288	0.00729914	0.0562225
CPSF2	ENSG00000165934.13	1383.83	0.13145	0.049021	2.68149	0.00732945	0.0563856
NUDT4	ENSG00000173598.14	408.098	-0.346183	0.129103	-2.68144	0.00733065	0.0563856
SLC30A4	ENSG00000104154.7	246.828	-0.357465	0.133312	-2.68141	0.00733118	0.0563856
CCDC57	ENSG00000176155.19	339.361	-0.244788	0.091311	-2.68081	0.00734433	0.0564589
CUL1	ENSG00000055130.17	962.575	0.167868	0.0626338	2.68015	0.00735882	0.0565423
TMEM37	ENSG00000171227.7	70.2097	-0.562924	0.210053	-2.67991	0.00736412	0.0565551
HHEX	ENSG00000152804.11	905.661	-0.229569	0.0856765	-2.67949	0.00737346	0.056599
RGS16	ENSG00000143333.7	1269.11	-0.661426	0.2469	-2.67893	0.00738582	0.056638
TOX	ENSG00000198846.6	86.6589	0.500566	0.186959	2.67742	0.00741924	0.0568653
SLCO2B1	ENSG00000137491.15	8177.13	-0.121887	0.0455268	-2.67726	0.00742277	0.0568653
MRPS18B	ENSG00000204568.12	545.27	0.217341	0.0811857	2.67708	0.00742667	0.0568672
YPEL4	ENSG00000166793.12	33.6471	-1.33849	0.500022	-2.67686	0.00743153	0.0568764
DRG1	ENSG00000185721.13	535.806	0.227933	0.0851556	2.67667	0.00743588	0.0568818
H2BC10	ENSG00000278588.1	469.426	0.279826	0.104576	2.67583	0.0074545	0.0569962
METTL3	ENSG00000165819.12	479.648	0.218528	0.0816952	2.67492	0.00747473	0.0571115
MARCHF2	ENSG00000099785.10	502.124	-0.272878	0.102017	-2.67482	0.00747692	0.0571115
TIMP1	ENSG00000102265.12	615.771	-0.410222	0.153403	-2.67415	0.00749185	0.0571819
S100A10	ENSG00000197747.9	346.386	0.255666	0.0956093	2.67408	0.00749356	0.0571819
GPI	ENSG00000105220.17	3013.5	0.181711	0.0679568	2.67391	0.00749715	0.0571819
VPS13D	ENSG00000048707.15	1732.41	0.126577	0.0473457	2.67346	0.00750732	0.0572313
ZNF331	ENSG00000130844.18	103.65	0.579525	0.216792	2.67319	0.0075134	0.0572497
ANKRD22	ENSG00000152766.6	24.3556	-0.912129	0.341256	-2.67286	0.00752077	0.0572778
NOC3L	ENSG00000173145.11	292.79	0.325782	0.121926	2.67197	0.00754085	0.0574026
LYNX1	ENSG00000180155.20	114.425	0.69992	0.262134	2.67009	0.00758318	0.0576685
AGPAT3	ENSG00000160216.20	1278.13	0.144412	0.0540961	2.66955	0.0075952	0.0577317
SAMM50	ENSG00000100347.15	746.609	0.174248	0.0652796	2.66927	0.00760174	0.057739
ZNF106	ENSG00000103994.17	3835.37	0.0956983	0.035853	2.66918	0.00760359	0.057739
SLC25A14	ENSG00000102078.16	66.2026	-0.486639	0.182362	-2.66854	0.00761819	0.0578217
EIF2B3	ENSG00000070785.17	348.624	0.266474	0.0998943	2.66756	0.00764042	0.0579622
CCDC146	ENSG00000135205.15	33.753	-0.781564	0.293106	-2.66648	0.00766492	0.0581198
PIKFYVE	ENSG00000115020.17	1445.22	0.131938	0.049488	2.66606	0.00767468	0.0581654
CENPQ	ENSG00000031691.7	71.275	-0.509955	0.191327	-2.66536	0.00769061	0.0582577
GNAS	ENSG00000087460.25	7238.42	-0.137297	0.0515227	-2.66479	0.00770358	0.0583277
SLC25A23	ENSG00000125648.15	163.755	0.309934	0.116317	2.66456	0.00770891	0.0583396
SULT1B1	ENSG00000173597.9	2.65925	3.81198	1.43103	2.66381	0.00772619	0.058396
STIP1	ENSG00000168439.16	1669.98	0.169855	0.0637656	2.66375	0.00772761	0.058396
TMEM63A	ENSG00000196187.12	303.748	0.336323	0.126298	2.66292	0.00774654	0.0585106
CDIPT	ENSG00000103502.14	538.86	-0.216573	0.0813649	-2.66175	0.0077736	0.0586865
GPR132	ENSG00000183484.12	650.051	-0.226311	0.0850444	-2.6611	0.00778863	0.0587708
ZNF43	ENSG00000198521.11	87.7433	-0.491817	0.184828	-2.66094	0.00779232	0.0587708
LYRM4	ENSG00000214113.10	190.386	0.300167	0.112853	2.65981	0.00781837	0.0589193
NOP2	ENSG00000111641.11	691.786	0.291506	0.109598	2.65976	0.00781958	0.0589193
TMEM30A	ENSG00000112697.17	2366.81	-0.249037	0.0936488	-2.65926	0.00783121	0.0589785
THAP12	ENSG00000137492.8	768.771	-0.205954	0.0774744	-2.65835	0.00785236	0.0591091
CMPK2	ENSG00000134326.11	268.069	0.29826	0.112246	2.65719	0.00787949	0.0592593
COPS7A	ENSG00000111652.10	641.414	0.210872	0.0793594	2.65717	0.00787992	0.0592593
GSTO2	ENSG00000065621.15	6.01272	-1.99332	0.750389	-2.65638	0.00789846	0.05937
RPS10	ENSG00000124614.16	5521.35	-0.193	0.0727296	-2.65366	0.00796237	0.0598058
SART3	ENSG00000075856.12	997.564	0.203907	0.0768421	2.65359	0.00796412	0.0598058
SREBF1	ENSG00000072310.17	650.111	-0.236207	0.0890208	-2.6534	0.00796861	0.0598106
PCDH20	ENSG00000280165.1	28.5889	-0.862946	0.325324	-2.65257	0.00798808	0.059928
TMEM71	ENSG00000165071.14	91.1962	0.530197	0.19996	2.65151	0.00801319	0.0600874
PTPN18	ENSG00000072135.13	1058.45	0.170521	0.0643274	2.65083	0.00802949	0.0601605
ITSN1	ENSG00000205726.15	311.657	0.255246	0.0962911	2.65078	0.00803067	0.0601605
TOMM40L	ENSG00000158882.15	503.178	0.222904	0.0841027	2.65038	0.00804008	0.060202
KLRC4-KLRK1	ENSG00000255819.7	53.8342	-0.845883	0.319213	-2.64991	0.00805144	0.060258
EXOC3	ENSG00000180104.16	1337.91	0.137971	0.0520698	2.64973	0.00805566	0.0602606
COPS9	ENSG00000172428.11	192.861	-0.302728	0.11428	-2.649	0.00807292	0.0603608
ANAPC1	ENSG00000153107.13	1203.21	0.173619	0.0655503	2.64863	0.00808179	0.0603981
DNAJB6	ENSG00000105993.15	1170.9	0.13957	0.0527019	2.64829	0.00808991	0.0604298
MAPRE1	ENSG00000101367.9	1826.33	0.121027	0.0457078	2.64784	0.00810087	0.0604826
PCCB	ENSG00000114054.14	560.317	0.214341	0.0809817	2.64678	0.00812613	0.0606421
ACSS2	ENSG00000131069.20	848.515	0.266362	0.100669	2.64592	0.00814692	0.0607682
ZNF677	ENSG00000197928.10	21.1106	-0.984127	0.372264	-2.64363	0.00820226	0.0611516
NCOA4	ENSG00000266412.5	7817.67	-0.0973557	0.036832	-2.64324	0.00821173	0.0611929
MMP12	ENSG00000262406.3	4.50169	-2.01832	0.763751	-2.64264	0.0082263	0.0612722
MYO7A	ENSG00000137474.22	142.084	1.39761	0.528943	2.64228	0.00823504	0.0613079
RPS28	ENSG00000233927.5	2055.95	-0.195452	0.0739835	-2.64183	0.00824586	0.0613591
EVA1B	ENSG00000142694.6	110.78	-0.520624	0.197123	-2.64111	0.0082635	0.061461
NLRC4	ENSG00000091106.19	526.095	0.253247	0.095897	2.64082	0.00827057	0.0614842
GPR155	ENSG00000163328.13	80.9481	0.575821	0.218172	2.63931	0.0083076	0.0617301
NPC2	ENSG00000119655.10	6643.66	-0.15652	0.0593086	-2.63908	0.00831323	0.0617424
OSBPL8	ENSG00000091039.17	2544.53	-0.217507	0.082443	-2.63827	0.00833298	0.0618595
POLA2	ENSG00000014138.9	408.871	0.310648	0.117761	2.63795	0.00834077	0.0618879
EPRS1	ENSG00000136628.18	2142.87	0.166234	0.0630266	2.63752	0.00835135	0.0619369
PFDN1	ENSG00000113068.10	649.581	0.219966	0.0834074	2.63725	0.00835806	0.0619571
RTL8A	ENSG00000203950.6	43.6883	-0.584847	0.221782	-2.63703	0.00836348	0.0619678
DMD	ENSG00000198947.15	3.81419	3.44195	1.30541	2.63667	0.00837234	0.0620039
CCNYL1	ENSG00000163249.12	127.375	0.468294	0.177624	2.63644	0.00837815	0.0620174
PIP5K1A	ENSG00000143398.20	743.463	0.194896	0.0739355	2.63604	0.0083881	0.0620497
DDX47	ENSG00000213782.7	662.433	0.213956	0.0811847	2.63543	0.00840315	0.0621139
AURKB	ENSG00000178999.13	364.181	0.297997	0.113081	2.63524	0.00840766	0.0621177
LRIG1	ENSG00000144749.13	227.349	0.350953	0.133248	2.63382	0.00844294	0.0623488
SPC24	ENSG00000161888.11	285.384	0.368363	0.139869	2.63363	0.00844771	0.0623544
STAT2	ENSG00000170581.14	1896.46	0.129421	0.0491569	2.63282	0.00846793	0.0624741
TBC1D7	ENSG00000145979.18	144.877	0.344201	0.130748	2.63256	0.00847449	0.0624928
IFIT2	ENSG00000119922.10	28.4939	-1.03799	0.394554	-2.6308	0.00851853	0.0627581
ZNRF1	ENSG00000186187.12	55.1826	0.726026	0.276007	2.63046	0.00852703	0.0627716
ASXL2	ENSG00000143970.17	831.027	0.191289	0.0727224	2.6304	0.00852842	0.0627716
HAGHL	ENSG00000103253.18	116.345	0.377832	0.143687	2.62955	0.0085498	0.0628992
ADM5	ENSG00000224420.3	9.6246	1.4631	0.556647	2.62842	0.00857831	0.0630748
GOT2	ENSG00000125166.13	870.34	0.177827	0.0676591	2.62828	0.00858177	0.0630748
BIRC6	ENSG00000115760.14	4470.45	0.127688	0.0485939	2.62765	0.00859773	0.0631623
MOCOS	ENSG00000075643.6	68.5134	-0.690845	0.263064	-2.62614	0.00863582	0.0634122
PMP22	ENSG00000109099.15	523.362	0.966976	0.368271	2.62572	0.00864656	0.0634611
USP4	ENSG00000114316.13	763.46	0.179884	0.0685234	2.62515	0.00866108	0.0635377
LACTB2	ENSG00000147592.9	141.993	-0.377866	0.143997	-2.62413	0.008687	0.0636979
BATF3	ENSG00000123685.9	40.4414	-0.872103	0.332378	-2.62383	0.0086948	0.063725
HSP90AA1	ENSG00000080824.18	5688.94	0.123478	0.0470955	2.62187	0.00874492	0.0640622
CISH	ENSG00000114737.15	118.019	0.393027	0.149999	2.6202	0.00878783	0.0643463
RFC2	ENSG00000049541.11	767.586	0.201561	0.0769318	2.62	0.00879299	0.0643538
SFXN2	ENSG00000156398.13	135.62	0.516474	0.197147	2.61973	0.00879982	0.0643735
ZMYM1	ENSG00000197056.11	138.56	-0.36619	0.139857	-2.61831	0.00883675	0.0645829
ZNF670	ENSG00000277462.2	77.7809	-0.553734	0.211501	-2.61811	0.00884176	0.0645892
FEZ1	ENSG00000149557.14	10.3474	-1.45287	0.555015	-2.61772	0.00885206	0.0646342
JUNB	ENSG00000171223.6	1729.06	-0.362358	0.138445	-2.61734	0.00886188	0.0646755
UST	ENSG00000111962.8	251.665	-0.513376	0.196195	-2.61666	0.00887939	0.0647729
CHMP3	ENSG00000115561.16	877.219	0.175696	0.0671801	2.6153	0.00891501	0.0649386
LPAR5	ENSG00000184574.10	471.782	-0.218896	0.0837037	-2.61513	0.00891941	0.0649386
ISOC1	ENSG00000066583.12	146.984	-0.333672	0.1276	-2.61499	0.00892296	0.0649386
MRPL1	ENSG00000169288.18	151.74	0.425502	0.162734	2.6147	0.00893047	0.0649629
EPHB3	ENSG00000182580.3	288.101	0.439554	0.16814	2.61422	0.00894321	0.0650075
RAD50	ENSG00000113522.14	521.575	-0.29965	0.114626	-2.61415	0.00894496	0.0650075
TMEM245	ENSG00000106771.13	650.396	0.185151	0.0708902	2.6118	0.00900671	0.0654258
ZDHHC23	ENSG00000184307.15	15.3655	-1.31346	0.502945	-2.61154	0.00901346	0.0654443
STIMATE-MUSTN1	ENSG00000248592.7	46.8222	0.804215	0.307988	2.61119	0.00902284	0.0654818
DAPK2	ENSG00000035664.11	62.276	-0.790798	0.302965	-2.6102	0.00904898	0.0656409
HGF	ENSG00000019991.18	4.18214	-2.38651	0.914669	-2.60916	0.00907661	0.0657855
TMEM144	ENSG00000164124.11	1199.12	-0.202646	0.077668	-2.60913	0.00907736	0.0657855
SLC12A6	ENSG00000140199.12	1214.48	-0.187452	0.0718502	-2.60892	0.00908283	0.0657945
GMNN	ENSG00000112312.10	193.824	0.32581	0.124905	2.60846	0.00909515	0.0658531
SELENOH	ENSG00000211450.10	1344.5	-0.160188	0.0614153	-2.60827	0.00910011	0.0658584
TRIM27	ENSG00000204713.11	1409.51	0.14575	0.0558856	2.60801	0.00910716	0.0658597
HS6ST1	ENSG00000136720.7	297.874	0.289109	0.110857	2.60795	0.00910875	0.0658597
ATP2A3	ENSG00000074370.18	1431.68	-0.310375	0.119079	-2.60647	0.00914819	0.0661142
NXF3	ENSG00000147206.17	4.5094	2.57232	0.987105	2.60592	0.00916271	0.0661806
CCR2	ENSG00000121807.5	98.7531	0.403899	0.155	2.6058	0.00916589	0.0661806
ZC3H12D	ENSG00000178199.14	147.414	-0.334589	0.128484	-2.60413	0.00921065	0.0664702
PSME2	ENSG00000100911.16	793.695	0.183809	0.07059	2.60389	0.00921718	0.0664702
CDC37	ENSG00000105401.9	1524.5	0.174405	0.0669831	2.60372	0.00922175	0.0664702
SERPINB9	ENSG00000170542.6	839.329	0.18192	0.0698737	2.60355	0.00922627	0.0664702
WDR76	ENSG00000092470.12	313.963	0.277697	0.106663	2.6035	0.00922759	0.0664702
RFC5	ENSG00000111445.14	249.137	0.328953	0.126361	2.60327	0.00923388	0.0664702
AL049834.1	ENSG00000042317.17	74.705	0.443096	0.170212	2.6032	0.00923589	0.0664702
RAB22A	ENSG00000124209.4	613.848	-0.250779	0.0963564	-2.60262	0.00925135	0.066524
ARMC10	ENSG00000170632.14	290.286	-0.281455	0.108188	-2.60154	0.00928063	0.0666997
CCNL1	ENSG00000163660.11	1810.68	-0.178872	0.0687926	-2.60017	0.00931783	0.0669362
AP003419.1	ENSG00000256514.1	208.779	-1.13057	0.434861	-2.59985	0.00932642	0.066967
HTT	ENSG00000197386.12	1473.68	0.172756	0.0665188	2.5971	0.00940143	0.0674351
PPM1G	ENSG00000115241.11	1374.41	0.147485	0.0567909	2.59698	0.00940461	0.0674351
OSTF1	ENSG00000134996.12	1234.48	0.191237	0.0736684	2.59591	0.00943406	0.0676151
GLCCI1	ENSG00000106415.13	252.257	-0.290859	0.112066	-2.59542	0.00944749	0.06766
BIN1	ENSG00000136717.15	1787.06	-0.164349	0.0633251	-2.59533	0.00945013	0.06766
INTS6L	ENSG00000165359.15	599.08	-0.259118	0.0998502	-2.59507	0.00945719	0.06766
NFYA	ENSG00000001167.14	385.686	0.263166	0.101411	2.59505	0.00945771	0.06766
RAB11FIP4	ENSG00000131242.18	582.994	-0.475702	0.183378	-2.59411	0.0094837	0.0678147
P3H2	ENSG00000090530.10	660.206	-0.262478	0.101201	-2.59364	0.00949667	0.0678674
AP001931.2	ENSG00000288534.1	650.407	0.629238	0.242619	2.59352	0.00949978	0.0678674
DAP3	ENSG00000132676.16	1155.31	0.176448	0.0680423	2.59321	0.00950839	0.0678977
RPS19	ENSG00000105372.8	8866.78	-0.204712	0.0789538	-2.59281	0.00951961	0.0679467
ANKFY1	ENSG00000185722.18	1419.71	0.207957	0.0802333	2.59191	0.00954454	0.0680436
EIF1AY	ENSG00000198692.10	45.183	8.90302	3.43499	2.59186	0.00954589	0.0680436
CKB	ENSG00000166165.13	1138.08	-0.274904	0.106068	-2.59176	0.00954876	0.0680436
RPL4	ENSG00000174444.15	17157.5	0.115088	0.0444066	2.59169	0.00955067	0.0680436
RPS9	ENSG00000170889.14	4337.65	-0.173513	0.0669687	-2.59096	0.00957098	0.0681571
ZNF699	ENSG00000196110.8	70.576	-0.502834	0.194196	-2.58931	0.00961683	0.0684523
RCAN3	ENSG00000117602.12	302.881	0.319081	0.123246	2.58898	0.00962614	0.0684873
UHRF1BP1	ENSG00000065060.17	1196.14	0.131851	0.0509643	2.58713	0.00967784	0.0687922
[truncated: 1,327 more rows]

## Sheet: Table S3
Supplemental Table 3: Pathway analysis of the up- and down-regulated genes in NHD versus SB CTRL iMGLs
Term	P value	Adjusted P Value	Odds Ratio	Combined Score	Gene Direction
Precocious puberty (HP:0000826)	0.000198381	0.183462	3.90106	33.2578	upregulated
Renovascular hypertension (HP:0100817)	0.000255519	0.183462	11.1389	92.1433	upregulated
Increased nuchal translucency (HP:0010880)	0.000511624	0.244897	5.7156	43.3124	upregulated
CNS demyelination (HP:0007305)	0.000936201	0.336096	3.6514	25.4637	upregulated
Obsessive-compulsive behavior (HP:0000722)	0.00179839	0.436992	3.57335	22.5867	upregulated
Lethargy (HP:0001254)	0.00182587	0.436992	2.47156	15.5849	upregulated
Blindness (HP:0000618)	0.0027307	0.517746	2.43972	14.4022	upregulated
Megaloblastic anemia (HP:0001889)	0.00288438	0.517746	5.5679	32.5636	upregulated
Sandal gap (HP:0001852)	0.00343413	0.546822	3.20316	18.1747	upregulated
Renal duplication (HP:0000075)	0.00386176	0.546822	6.62615	36.8191	upregulated
Cholecystitis (HP:0001082)	0.00456954	0.546822	9.27338	49.9682	upregulated
Abnormal gallbladder physiology (HP:0012438)	0.00456954	0.546822	9.27338	49.9682	upregulated
Babinski sign (HP:0003487)	0.00644993	0.663243	1.95412	9.85598	upregulated
Abnormality of the gallbladder (HP:0005264)	0.00646616	0.663243	3.09514	15.6031	upregulated
Nephrocalcinosis (HP:0000121)	0.00782065	0.699391	2.98443	14.4775	upregulated
Spastic paraplegia (HP:0001258)	0.00821452	0.699391	3.22876	15.5041	upregulated
Respiratory failure (HP:0002878)	0.00914402	0.699391	2.42348	11.3774	upregulated
Cardiomegaly (HP:0001640)	0.00938076	0.699391	2.88136	13.4534	upregulated
Lactic acidosis (HP:0003128)	0.00974079	0.699391	1.94183	8.99347	upregulated
Abnormality of the diencephalon (HP:0010662)	0.0114261	0.699391	4.63753	20.7384	upregulated
Hyperacusis (HP:0010780)	0.011689	0.699391	6.18157	27.5025	upregulated
Overriding aorta (HP:0002623)	0.011689	0.699391	6.18157	27.5025	upregulated
Atonic seizures (HP:0010819)	0.011689	0.699391	6.18157	27.5025	upregulated
Elfin facies (HP:0004428)	0.011689	0.699391	6.18157	27.5025	upregulated
Pointed chin (HP:0000307)	0.0131909	0.716714	2.69517	11.6653	upregulated
Increased CSF lactate (HP:0002490)	0.0136874	0.716714	2.50947	10.7688	upregulated
Sloping forehead (HP:0000340)	0.0143089	0.716714	2.09804	8.91011	upregulated
Paraplegia (HP:0010550)	0.014554	0.716714	2.85574	12.0795	upregulated
Absence seizures (HP:0002121)	0.0153088	0.716714	4.2157	17.6188	upregulated
Broad forehead (HP:0000337)	0.0159662	0.716714	2.06462	8.54192	upregulated
Hepatic necrosis (HP:0002605)	0.0161679	0.716714	3.47878	14.349	upregulated
Acute encephalopathy (HP:0006846)	0.0161679	0.716714	3.47878	14.349	upregulated
Cerebral hypomyelination (HP:0006808)	0.0169695	0.716714	5.29819	21.5972	upregulated
Abnormality of pyrimidine metabolism (HP:0004353)	0.0169695	0.716714	5.29819	21.5972	upregulated
Cerebral edema (HP:0002181)	0.0189642	0.760048	2.95223	11.7062	upregulated
Personality changes (HP:0000751)	0.0199818	0.760048	3.86418	15.1203	upregulated
Rhabdomyolysis (HP:0003201)	0.0199818	0.760048	3.86418	15.1203	upregulated
Cholelithiasis (HP:0001081)	0.0201127	0.760048	3.27397	12.7894	upregulated
Emotional lability (HP:0000712)	0.0209014	0.7696	2.45695	9.50334	upregulated
Flat cornea (HP:0007720)	0.0235234	0.77904	4.63566	17.3826	upregulated
Insomnia (HP:0100785)	0.0235234	0.77904	4.63566	17.3826	upregulated
Macrocytic anemia (HP:0001972)	0.023858	0.77904	2.55989	9.56282	upregulated
Unsteady gait (HP:0002317)	0.0246628	0.77904	3.09191	11.4477	upregulated
Mandibular prognathia (HP:0000303)	0.0250711	0.77904	1.83528	6.76491	upregulated
Hepatocellular necrosis (HP:0001404)	0.0254978	0.77904	3.56674	13.0869	upregulated
Urinary urgency (HP:0000012)	0.0254978	0.77904	3.56674	13.0869	upregulated
Acute necrotizing encephalopathy (HP:0006965)	0.0254978	0.77904	3.56674	13.0869	upregulated
Leukodystrophy (HP:0002415)	0.0277186	0.829249	2.47442	8.87242	upregulated
Narrow face (HP:0000275)	0.030312	0.880919	2.1586	7.54691	upregulated
Tetraplegia (HP:0002445)	0.0314112	0.880919	4.12036	14.2589	upregulated
Abnormality of methionine metabolism (HP:0010901)	0.0314112	0.880919	4.12036	14.2589	upregulated
Advanced eruption of teeth (HP:0006288)	0.0318996	0.880919	3.31179	11.4097	upregulated
Scanning speech (HP:0002168)	0.0356247	0.908363	5.56086	18.5439	upregulated
Entropion (HP:0000621)	0.0356247	0.908363	5.56086	18.5439	upregulated
Abnormal gallbladder morphology (HP:0012437)	0.0357049	0.908363	2.78241	9.27228	upregulated
Hypoplastic toenails (HP:0001800)	0.0369308	0.908363	2.49749	8.23848	upregulated
Abnormal mitochondria in muscle tissue (HP:0008316)	0.0392191	0.908363	3.09083	10.0099	upregulated
Bone pain (HP:0002653)	0.0418331	0.908363	2.2491	7.1388	upregulated
Abnormality of the endocardium (HP:0004306)	0.0418331	0.908363	2.2491	7.1388	upregulated
Gliosis (HP:0002171)	0.042524	0.908363	2.01748	6.37057	upregulated
Progressive disorder (HP:0003676)	0.0425381	0.908363	1.5738	4.96904	upregulated
Hyperammonemia (HP:0001987)	0.0427322	0.908363	2.40485	7.58203	upregulated
Pancytopenia (HP:0001876)	0.0427322	0.908363	2.40485	7.58203	upregulated
Dysarthria (HP:0001260)	0.0448215	0.908363	1.46271	4.54181	upregulated
Juvenile onset (HP:0003621)	0.0451613	0.908363	1.75665	5.44123	upregulated
Sudden cardiac death (HP:0001645)	0.0451613	0.908363	1.75665	5.44123	upregulated
Dialeptic seizures (HP:0011146)	0.0474779	0.908363	2.89749	8.83009	upregulated
Progressive macrocephaly (HP:0004481)	0.0474779	0.908363	2.89749	8.83009	upregulated
Abnormality of fatty-acid metabolism (HP:0004359)	0.0474779	0.908363	2.89749	8.83009	upregulated
Abnormality of nucleobase metabolism (HP:0010932)	0.0490912	0.908363	2.31884	6.98915	upregulated
Increased serum lactate (HP:0002151)	0.0490992	0.908363	1.82602	5.50345	upregulated
Recurrent urinary tract infections (HP:0000010)	0.0492211	0.908363	1.77477	5.34461	upregulated
Postnatal microcephaly (HP:0005484)	0.0494951	0.908363	2.52918	7.60242	upregulated
Abnormality of the carotid arteries (HP:0005344)	0.0494951	0.908363	2.52918	7.60242	upregulated
Microglossia (HP:0000171)	0.0496402	0.908363	4.6338	13.9151	upregulated
Increased connective tissue (HP:0009025)	0.0496402	0.908363	4.6338	13.9151	upregulated
Abnormality of glycolysis (HP:0004366)	0.0496402	0.908363	4.6338	13.9151	upregulated
NF-kappa B signaling pathway	1.46e-11	4.51e-09	4.93728	123.2	downregulated
Osteoclast differentiation	2.06e-08	3.19e-06	3.56183	63.0441	downregulated
TNF signaling pathway	1.58e-07	1.63e-05	3.53914	55.4291	downregulated
Necroptosis	6.43e-07	4.53e-05	2.8622	40.8071	downregulated
Epstein-Barr virus infection	7.31e-07	4.53e-05	2.58575	36.533	downregulated
Human T-cell leukemia virus 1 infection	1.02e-06	5.25e-05	2.48149	34.2456	downregulated
Tuberculosis	1.82e-06	8.06e-05	2.62392	34.6804	downregulated
Human cytomegalovirus infection	2.14e-06	8.3e-05	2.39888	31.3146	downregulated
Leishmaniasis	3.21e-06	0.00011	3.78719	47.9085	downregulated
Coronavirus disease	4.88e-06	0.000151	2.30914	28.2406	downregulated
Apoptosis	9.45e-06	0.000266	2.71037	31.3583	downregulated
MAPK signaling pathway	1.08e-05	0.000279	2.08167	23.8083	downregulated
Salmonella infection	1.35e-05	0.000321	2.17771	24.4231	downregulated
Pathogenic Escherichia coli infection	1.6e-05	0.000329	2.34292	25.8666	downregulated
Fluid shear stress and atherosclerosis	1.7e-05	0.000329	2.66646	29.2839	downregulated
Measles	1.7e-05	0.000329	2.66646	29.2839	downregulated
Toxoplasmosis	1.91e-05	0.000333	2.90357	31.5557	downregulated
p53 signaling pathway	1.94e-05	0.000333	3.54985	38.5251	downregulated
Hepatitis B	2.07e-05	0.000337	2.49107	26.87	downregulated
Influenza A	2.88e-05	0.000447	2.40273	25.1179	downregulated
Phagosome	3.76e-05	0.000555	2.48683	25.339	downregulated
Shigellosis	4.82e-05	0.000679	2.08668	20.7416	downregulated
Rheumatoid arthritis	7.21e-05	0.000944	2.94299	28.0696	downregulated
Lysosome	7.31e-05	0.000944	2.57494	24.5242	downregulated
Endocytosis	8.49e-05	0.00105271	2.02638	18.9955	downregulated
Transcriptional misregulation in cancer	0.000118	0.0014031	2.17677	19.6945	downregulated
Kaposi sarcoma-associated herpesvirus infection	0.000131	0.00146766	2.16296	19.344	downregulated
Pathways in cancer	0.000134	0.00146766	1.64779	14.6981	downregulated
Toll-like receptor signaling pathway	0.000137	0.00146766	2.70715	24.0757	downregulated
Cellular senescence	0.000153	0.00157825	2.30736	20.2743	downregulated
Viral carcinogenesis	0.000162	0.00162498	2.10743	18.387	downregulated
Human immunodeficiency virus 1 infection	0.00018	0.00174781	2.06936	17.8383	downregulated
Bladder cancer	0.000197	0.00184651	4.16431	35.5404	downregulated
Yersinia infection	0.000233	0.0021226	2.36498	19.7826	downregulated
Lipid and atherosclerosis	0.00024	0.0021226	2.03434	16.9589	downregulated
Glioma	0.000325	0.00279757	2.95319	23.7202	downregulated
Renal cell carcinoma	0.000367	0.00307364	3.04084	24.0547	downregulated
Malaria	0.000394	0.00318758	3.53631	27.7232	downregulated
Primary immunodeficiency	0.000401	0.00318758	4.09823	32.0543	downregulated
NOD-like receptor signaling pathway	0.000421	0.00326047	2.08797	16.231	downregulated
AGE-RAGE signaling pathway in diabetic complications	0.000586	0.00443378	2.52004	18.7529	downregulated
Melanoma	0.000609	0.00449132	2.87746	21.3062	downregulated
Glycosaminoglycan biosynthesis	0.000722	0.00520694	3.27055	23.6563	downregulated
Chagas disease	0.000763	0.00537862	2.45831	17.645	downregulated
Proteoglycans in cancer	0.000866	0.00596769	1.93819	13.6668	downregulated
PD-L1 expression and PD-1 checkpoint pathway in cancer	0.000942	0.00634849	2.55396	17.7947	downregulated
C-type lectin receptor signaling pathway	0.000985	0.00636528	2.39951	16.6124	downregulated
Axon guidance	0.000986	0.00636528	1.99269	13.7939	downregulated
Adipocytokine signaling pathway	0.00113243	0.00702148	2.79629	18.9683	downregulated
Chronic myeloid leukemia	0.0011325	0.00702148	2.68504	18.2135	downregulated
Small cell lung cancer	0.00140584	0.00854527	2.45002	16.0896	downregulated
Non-small cell lung cancer	0.001783	0.0106294	2.64867	16.7647	downregulated
Longevity regulating pathway	0.00192137	0.0110994	2.30584	14.4224	downregulated
Hepatitis C	0.00193344	0.0110994	2.0017	12.5075	downregulated
B cell receptor signaling pathway	0.00228148	0.0128593	2.47781	15.0724	downregulated
Fc gamma R-mediated phagocytosis	0.0026046	0.0144183	2.29432	13.6523	downregulated
Ferroptosis	0.00302922	0.0164747	3.24242	18.8042	downregulated
Pancreatic cancer	0.00310927	0.0166185	2.47444	14.2859	downregulated
Cell adhesion molecules	0.00372876	0.0194067	1.9506	10.9072	downregulated
Insulin resistance	0.00375613	0.0194067	2.14968	12.0046	downregulated
Other glycan degradation	0.00395658	0.0201072	5.01989	27.7719	downregulated
HIF-1 signaling pathway	0.00417108	0.0208554	2.12568	11.6478	downregulated
Inflammatory bowel disease	0.00507366	0.0247987	2.51414	13.284	downregulated
Neurotrophin signaling pathway	0.00511973	0.0247987	2.03426	10.73	downregulated
PI3K-Akt signaling pathway	0.00533492	0.0254435	1.54713	8.09687	downregulated
Th17 cell differentiation	0.00758176	0.0356113	2.03541	9.93688	downregulated
Pertussis	0.00791916	0.0366409	2.27085	10.9874	downregulated
Th1 and Th2 cell differentiation	0.00832377	0.0379466	2.11789	10.1418	downregulated
Focal adhesion	0.00848968	0.038142	1.69944	8.10449	downregulated
Epithelial cell signaling in Helicobacter pylori infection	0.00960912	0.0419553	2.29297	10.651	downregulated
RIG-I-like receptor signaling pathway	0.00960912	0.0419553	2.29297	10.651	downregulated
AMPK signaling pathway	0.0117659	0.0506587	1.89302	8.40983	downregulated
Autophagy	0.0120003	0.0509603	1.82225	8.05947	downregulated
Rap1 signaling pathway	0.0150848	0.0631929	1.61413	6.76979	downregulated
Human papillomavirus infection	0.0168157	0.0695049	1.46599	5.9892	downregulated
Glycerolipid metabolism	0.0202739	0.0826961	2.21024	8.61644	downregulated
Amoebiasis	0.0213427	0.085925	1.87059	7.19627	downregulated
Apelin signaling pathway	0.0228341	0.090751	1.71959	6.49917	downregulated
Regulation of actin cytoskeleton	0.0239262	0.0928179	1.54512	5.76761	downregulated
Relaxin signaling pathway	0.023953	0.0928179	1.73727	6.4829	downregulated
T cell receptor signaling pathway	0.0251989	0.0964404	1.82788	6.72834	downregulated
Amino sugar and nucleotide sugar metabolism	0.0269929	0.101084	2.31727	8.3704	downregulated
FoxO signaling pathway	0.0276453	0.101084	1.70606	6.12185	downregulated
Cytokine-cytokine receptor interaction	0.0276799	0.101084	1.44507	5.18354	downregulated
Leukocyte transendothelial migration	0.0282895	0.101084	1.76203	6.28209	downregulated
Phosphatidylinositol signaling system	0.0283686	0.101084	1.83861	6.55001	downregulated
Prostate cancer	0.0283686	0.101084	1.83861	6.55001	downregulated
cGMP-PKG signaling pathway	0.0288225	0.101534	1.60702	5.69946	downregulated
Sphingolipid metabolism	0.0304938	0.105175	2.25921	7.88518	downregulated
Ras signaling pathway	0.0308575	0.105175	1.49529	5.20119	downregulated
Legionellosis	0.0311419	0.105175	2.13673	7.41275	downregulated
Platelet activation	0.0312133	0.105175	1.70737	5.9193	downregulated
Hematopoietic cell lineage	0.0333522	0.111174	1.79464	6.1029	downregulated
Endometrial cancer	0.03468	0.11437	2.0921	7.03279	downregulated
Viral protein interaction with cytokine and cytokine receptor	0.0360701	0.11666	1.77343	5.89184	downregulated
Neutrophil extracellular trap formation	0.036127	0.11666	1.53375	5.09315	downregulated
Acute myeloid leukemia	0.0379935	0.121422	1.97277	6.45164	downregulated
Sphingolipid signaling pathway	0.0405792	0.128363	1.67519	5.36814	downregulated
Non-alcoholic fatty liver disease	0.0413636	0.129522	1.57589	5.01978	downregulated
Chemokine signaling pathway	0.0424473	0.131587	1.50595	4.75804	downregulated
Bacterial invasion of epithelial cells	0.044263	0.135857	1.85424	5.78079	downregulated
Calcium signaling pathway	0.0454386	0.13773	1.43769	4.44447	downregulated
Renin secretion	0.045762	0.13773	1.90454	5.87417	downregulated
Thyroid cancer	0.0462197	0.13777	2.34159	7.19886	downregulated
Natural killer cell mediated cytotoxicity	0.0497403	0.146852	1.60098	4.80445	downregulated

## Sheet: Table S4
Supplemental Table 4: Differential gene expression between NHD and SB CTRL macrophages
Gene Name	GeneID	base Mean	log2 Fold Change	lfcSE	stat	P value	Adjusted P value
ALK	ENSG00000171094.18	394.697	4.81481	0.220777	21.8085	1.93e-105	3.1e-101
RNASE1	ENSG00000129538.14	21552.5	1.46974	0.0877135	16.7562	5.1e-63	2.05e-59
MMP9	ENSG00000100985.7	17239.5	-2.27412	0.14093	-16.1365	1.41e-58	4.54e-55
COL6A2	ENSG00000142173.16	213.157	-2.71009	0.195284	-13.8777	8.65e-44	2.32e-40
MYOF	ENSG00000138119.17	1208.51	-2.19997	0.164483	-13.375	8.46e-41	1.94e-37
COL6A1	ENSG00000142156.15	182.858	-2.6178	0.200169	-13.0779	4.4e-39	8.85e-36
FUCA1	ENSG00000179163.11	66489.4	1.37171	0.11414	12.0178	2.87e-33	5.12e-30
RPS26	ENSG00000197728.11	940.288	1.19966	0.108346	11.0724	1.71e-28	2.49e-25
FN1	ENSG00000115414.20	746.249	-4.97161	0.45787	-10.8581	1.82e-27	2.44e-24
AK4	ENSG00000162433.15	91.6088	-3.61399	0.333058	-10.8509	1.97e-27	2.44e-24
FCGRT	ENSG00000104870.13	15164.6	0.947071	0.0891583	10.6224	2.35e-26	2.69e-23
SLC1A4	ENSG00000115902.11	469.654	-2.48298	0.237055	-10.4743	1.13e-25	1.22e-22
TGFBI	ENSG00000120708.17	14927.3	0.742511	0.0710185	10.4552	1.39e-25	1.39e-22
SLC28A3	ENSG00000197506.8	195.779	-3.82671	0.36635	-10.4455	1.54e-25	1.45e-22
TTC39B	ENSG00000155158.20	349.056	-2.64068	0.2531	-10.4333	1.75e-25	1.56e-22
ITGA6	ENSG00000091409.15	606.104	-1.61502	0.155342	-10.3965	2.57e-25	2.18e-22
TNFRSF9	ENSG00000049249.8	116.146	-2.73917	0.264529	-10.3549	3.98e-25	3.2e-22
GSDMA	ENSG00000167914.12	84.0047	5.0462	0.487657	10.3478	4.28e-25	3.28e-22
CPT1A	ENSG00000110090.13	1065.87	0.918282	0.0906735	10.1273	4.18e-24	3.05e-21
SLC36A1	ENSG00000123643.13	1909.87	0.873656	0.0868496	10.0594	8.35e-24	5.84e-21
NIBAN1	ENSG00000135842.17	541.199	-1.27138	0.128603	-9.88612	4.78e-23	3.2e-20
SPON2	ENSG00000159674.12	48.6504	-3.72678	0.377413	-9.87454	5.37e-23	3.45e-20
FLT1	ENSG00000102755.12	91.6523	-4.97847	0.51466	-9.67333	3.91e-22	2.42e-19
F3	ENSG00000117525.14	134.94	-3.56195	0.369832	-9.63127	5.9e-22	3.51e-19
CCND1	ENSG00000110092.4	300.34	-2.97017	0.313532	-9.47326	2.71e-21	1.5e-18
MYO1G	ENSG00000136286.16	853.37	1.09227	0.116764	9.35455	8.4e-21	4.5e-18
WARS1	ENSG00000140105.18	2644.46	-2.03154	0.219836	-9.24116	2.44e-20	1.26e-17
LDHA	ENSG00000134333.14	2207.49	-0.906589	0.0989366	-9.16333	5.03e-20	2.45e-17
SLC6A12	ENSG00000111181.12	114.147	-2.42469	0.266059	-9.11334	7.99e-20	3.78e-17
EGR2	ENSG00000122877.16	251.857	-1.82945	0.202169	-9.04911	1.44e-19	6.62e-17
NES	ENSG00000132688.11	109.582	-4.00282	0.442549	-9.04492	1.5e-19	6.69e-17
HMOX1	ENSG00000100292.17	12039.3	1.29901	0.143722	9.03833	1.59e-19	6.91e-17
THBS1	ENSG00000137801.11	182.595	2.7984	0.312701	8.94915	3.58e-19	1.52e-16
TPBG	ENSG00000146242.8	61.7448	2.66197	0.302256	8.807	1.29e-18	5.3e-16
FBP1	ENSG00000165140.10	785.734	-2.01012	0.22988	-8.74419	2.25e-18	9.03e-16
BCL2A1	ENSG00000140379.8	1037.17	-1.04143	0.119775	-8.69489	3.47e-18	1.36e-15
CCL22	ENSG00000102962.5	374.823	-5.14491	0.593863	-8.66347	4.58e-18	1.71e-15
TLN2	ENSG00000171914.16	92.3485	-2.27011	0.262403	-8.65123	5.09e-18	1.86e-15
MREG	ENSG00000118242.16	539.597	-1.95528	0.226477	-8.63347	5.95e-18	2.13e-15
ADGRG7	ENSG00000144820.8	119.646	10.3265	1.19652	8.63044	6.11e-18	2.14e-15
SRPX	ENSG00000101955.15	98.8861	2.3182	0.268753	8.62575	6.37e-18	2.18e-15
CHI3L1	ENSG00000133048.13	4032.78	-3.96763	0.46056	-8.61479	7.01e-18	2.35e-15
ACAT2	ENSG00000120437.9	692.867	-1.7733	0.206329	-8.59453	8.36e-18	2.74e-15
SIRPB2	ENSG00000196209.13	375.833	0.995225	0.116525	8.54088	1.33e-17	4.28e-15
CD14	ENSG00000170458.14	6518.94	0.705831	0.0831333	8.49035	2.06e-17	6.35e-15
SLAMF7	ENSG00000026751.17	1227.77	-1.44178	0.169852	-8.48847	2.09e-17	6.35e-15
ADGRE2	ENSG00000127507.18	254.567	-1.26969	0.149694	-8.48189	2.22e-17	6.6e-15
NXF3	ENSG00000147206.17	52.9945	3.90404	0.461322	8.46272	2.61e-17	7.63e-15
STARD4	ENSG00000164211.13	331.11	-1.27622	0.15202	-8.39513	4.65e-17	1.34e-14
ALAS1	ENSG00000023330.15	808.039	-1.16379	0.139397	-8.34877	6.9e-17	1.91e-14
CHIT1	ENSG00000133063.16	2159.93	-6.18099	0.745355	-8.29268	1.11e-16	3.02e-14
FGFR1	ENSG00000077782.20	139.857	-2.7502	0.332733	-8.26549	1.39e-16	3.73e-14
COL6A3	ENSG00000163359.16	50.414	-2.88916	0.350217	-8.24961	1.59e-16	4.19e-14
PLEKHO1	ENSG00000023902.14	845.815	-1.27944	0.155234	-8.24198	1.69e-16	4.39e-14
PLEC	ENSG00000178209.15	2899.82	0.925749	0.112954	8.19578	2.49e-16	6.23e-14
CD1D	ENSG00000158473.7	58.3978	2.48524	0.303285	8.19443	2.52e-16	6.23e-14
CYP51A1	ENSG00000001630.17	1278.35	-0.849275	0.105205	-8.07258	6.88e-16	1.68e-13
SPTBN2	ENSG00000173898.13	60.6475	-5.84881	0.726565	-8.04995	8.28e-16	1.99e-13
CLIC4	ENSG00000169504.15	1108.18	-0.679164	0.08459	-8.02889	9.84e-16	2.33e-13
HSD3B7	ENSG00000099377.14	881.667	-1.06488	0.132996	-8.00687	1.18e-15	2.74e-13
PPT1	ENSG00000131238.17	6035.59	-0.558465	0.0703045	-7.94352	1.97e-15	4.51e-13
APMAP	ENSG00000101474.12	2733.57	0.774585	0.0976605	7.9314	2.17e-15	4.91e-13
RFTN1	ENSG00000131378.14	519.918	-0.866226	0.109619	-7.90218	2.74e-15	6.12e-13
SEMA4A	ENSG00000196189.13	822.733	1.05676	0.134465	7.85901	3.87e-15	8.53e-13
GPAT3	ENSG00000138678.11	377.593	-2.3571	0.300374	-7.84721	4.25e-15	9.24e-13
KCNJ1	ENSG00000151704.15	55.6827	-4.59764	0.586493	-7.8392	4.53e-15	9.62e-13
DBI	ENSG00000155368.16	2334.58	-0.826727	0.105481	-7.83772	4.59e-15	9.62e-13
CRYBG1	ENSG00000112297.16	1261.29	-0.638401	0.0814584	-7.83714	4.61e-15	9.62e-13
CYP27B1	ENSG00000111012.10	45.0179	-3.81635	0.491626	-7.76271	8.31e-15	1.69e-12
AGAP9	ENSG00000204172.12	49.9687	3.46553	0.447674	7.7412	9.85e-15	1.98e-12
SNX10	ENSG00000086300.15	749.521	-1.46357	0.189439	-7.72577	1.11e-14	2.21e-12
MNDA	ENSG00000163563.8	883.193	-0.913384	0.119865	-7.62012	2.53e-14	4.97e-12
CD151	ENSG00000177697.19	547.949	-1.31688	0.173237	-7.6016	2.92e-14	5.64e-12
SUSD1	ENSG00000106868.16	1161.07	0.868696	0.114314	7.5992	2.98e-14	5.64e-12
GSN	ENSG00000148180.19	4175.07	-1.21169	0.159453	-7.599	2.98e-14	5.64e-12
GAPDH	ENSG00000111640.15	11469	-0.725411	0.0955038	-7.59562	3.06e-14	5.73e-12
MCOLN1	ENSG00000090674.16	972.409	0.863125	0.113999	7.57136	3.69e-14	6.82e-12
MYL9	ENSG00000101335.10	58.5056	-4.16375	0.550439	-7.56441	3.9e-14	7.12e-12
GEM	ENSG00000164949.8	50.4498	-4.1565	0.549962	-7.55779	4.1e-14	7.33e-12
FLRT2	ENSG00000185070.11	50.1165	-3.24475	0.429327	-7.55776	4.1e-14	7.33e-12
PLB1	ENSG00000163803.13	184.003	-1.84151	0.243752	-7.55484	4.19e-14	7.41e-12
SERPINB2	ENSG00000197632.9	2493.08	1.31164	0.174073	7.53498	4.88e-14	8.53e-12
CD276	ENSG00000103855.18	1163.75	-1.38329	0.184412	-7.50109	6.33e-14	1.09e-11
CSF1	ENSG00000184371.14	716.903	-3.51053	0.468576	-7.4919	6.79e-14	1.16e-11
ADORA3	ENSG00000282608.2	878.856	1.64637	0.221659	7.42749	1.11e-13	1.87e-11
G6PD	ENSG00000160211.19	523.993	-0.878726	0.118774	-7.39827	1.38e-13	2.31e-11
ACSL4	ENSG00000068366.20	1218.01	-0.747431	0.101046	-7.3969	1.39e-13	2.31e-11
KCNE1	ENSG00000180509.12	68.8539	-1.87785	0.255328	-7.35466	1.91e-13	3.14e-11
MS4A14	ENSG00000166928.11	65.5737	2.60474	0.355882	7.31911	2.5e-13	4.05e-11
GSTO2	ENSG00000065621.15	26.923	-4.05375	0.558392	-7.25968	3.88e-13	6.24e-11
LPL	ENSG00000175445.17	1882.96	-4.43087	0.611182	-7.24968	4.18e-13	6.65e-11
ZZEF1	ENSG00000074755.15	2235.89	0.650966	0.0905413	7.18971	6.49e-13	1.02e-10
TRIM54	ENSG00000138100.13	31.5782	-4.85237	0.674953	-7.1892	6.52e-13	1.02e-10
GPD1	ENSG00000167588.13	33.1235	-5.5402	0.771564	-7.18048	6.95e-13	1.07e-10
TFCP2L1	ENSG00000115112.8	160.228	-1.63142	0.227871	-7.1594	8.1e-13	1.24e-10
NINJ1	ENSG00000131669.10	3245.18	0.78599	0.11031	7.12528	1.04e-12	1.58e-10
ECH1	ENSG00000104823.9	447.551	1.04614	0.147076	7.1129	1.14e-12	1.71e-10
TMBIM1	ENSG00000135926.15	3758.01	-0.623313	0.0880042	-7.08276	1.41e-12	2.1e-10
P2RX7	ENSG00000089041.17	661.844	-1.19747	0.16926	-7.07474	1.5e-12	2.19e-10
SEMA4C	ENSG00000168758.11	83.5782	1.69329	0.240351	7.04508	1.85e-12	2.66e-10
SEMA7A	ENSG00000138623.10	128.837	-1.86305	0.265416	-7.01936	2.23e-12	3.17e-10
CLU	ENSG00000120885.22	59.3289	-4.3246	0.616289	-7.01716	2.26e-12	3.19e-10
GPC4	ENSG00000076716.9	132.844	-4.65462	0.664384	-7.00592	2.45e-12	3.43e-10
TTC9	ENSG00000133985.3	106.944	1.52426	0.217742	7.00028	2.55e-12	3.54e-10
DUSP5	ENSG00000138166.6	74.297	-2.61111	0.374188	-6.97807	2.99e-12	4.11e-10
GALNT12	ENSG00000119514.7	109.497	-3.0105	0.431635	-6.97465	3.07e-12	4.18e-10
DNASE2B	ENSG00000137976.7	62.3854	-3.16039	0.455185	-6.94308	3.84e-12	5.14e-10
PGK1	ENSG00000102144.15	4974.15	-0.493755	0.0711416	-6.94045	3.91e-12	5.19e-10
PHLDA3	ENSG00000174307.7	122.684	-3.05708	0.440606	-6.93836	3.97e-12	5.23e-10
ITGAM	ENSG00000169896.18	5114.09	-0.579898	0.0837713	-6.9224	4.44e-12	5.8e-10
TRPV4	ENSG00000111199.11	588.295	1.32796	0.192053	6.91455	4.69e-12	6.08e-10
DSE	ENSG00000111817.18	496.59	-1.03568	0.149833	-6.91221	4.77e-12	6.14e-10
COLQ	ENSG00000206561.13	125.441	-2.1069	0.304952	-6.90894	4.88e-12	6.23e-10
ERO1A	ENSG00000197930.13	842.15	-0.711932	0.103163	-6.90103	5.16e-12	6.54e-10
BCAT1	ENSG00000060982.15	1891.97	-1.24775	0.180969	-6.89484	5.39e-12	6.77e-10
LAMC1	ENSG00000135862.6	1023.29	0.759392	0.110634	6.86398	6.7e-12	8.35e-10
MAFB	ENSG00000204103.4	2492.57	0.869444	0.126881	6.85244	7.26e-12	8.98e-10
CALU	ENSG00000128595.17	2026.47	-0.47873	0.0699385	-6.84502	7.65e-12	9.38e-10
ZFP36	ENSG00000128016.7	653.252	0.877511	0.128225	6.84354	7.73e-12	9.41e-10
FDX1	ENSG00000137714.3	472.455	-1.3814	0.202691	-6.8153	9.41e-12	1.14e-09
TNFRSF12A	ENSG00000006327.13	68.7855	-2.21611	0.3255	-6.80833	9.87e-12	1.18e-09
BHLHE40	ENSG00000134107.5	1017.86	-0.684014	0.100479	-6.80753	9.93e-12	1.18e-09
ZFP57	ENSG00000204644.9	29.9692	8.32973	1.22883	6.77859	1.21e-11	1.43e-09
PLEK	ENSG00000115956.10	5303.31	-0.952606	0.140726	-6.76923	1.29e-11	1.51e-09
ZNF124	ENSG00000196418.12	970.346	0.924192	0.136695	6.76098	1.37e-11	1.59e-09
AP2A2	ENSG00000183020.13	1502.25	0.584692	0.0865457	6.75588	1.42e-11	1.63e-09
MSMO1	ENSG00000052802.13	386.798	-1.33736	0.198962	-6.72168	1.8e-11	2.05e-09
PTK2	ENSG00000169398.19	138.753	-1.48198	0.222081	-6.67314	2.5e-11	2.83e-09
LTB4R	ENSG00000213903.9	240.744	1.23467	0.185488	6.65634	2.81e-11	3.16e-09
RNF128	ENSG00000133135.14	16.225	-7.56912	1.14013	-6.63882	3.16e-11	3.53e-09
SLC20A1	ENSG00000144136.11	1108.39	-0.712342	0.107407	-6.63217	3.31e-11	3.67e-09
TNFSF15	ENSG00000181634.8	461.917	-2.97228	0.448254	-6.6308	3.34e-11	3.68e-09
CHST13	ENSG00000180767.10	138.478	1.29287	0.195133	6.6256	3.46e-11	3.78e-09
AIG1	ENSG00000146416.19	134.548	1.34349	0.204117	6.582	4.64e-11	5.01e-09
TREM2	ENSG00000095970.17	1350.92	-1.49708	0.227659	-6.57597	4.83e-11	5.18e-09
FP565260.3	ENSG00000277117.5	84.1111	2.56108	0.389747	6.57113	4.99e-11	5.32e-09
HSD11B1	ENSG00000117594.10	21.7974	-4.65923	0.709163	-6.57004	5.03e-11	5.32e-09
RPL13	ENSG00000167526.13	5080.79	0.506477	0.0773208	6.55033	5.74e-11	6.03e-09
GPR137B	ENSG00000077585.14	1135.22	0.585683	0.0896495	6.53303	6.45e-11	6.68e-09
MME	ENSG00000196549.10	130.698	-2.83268	0.435218	-6.50864	7.58e-11	7.68e-09
RDX	ENSG00000137710.16	1136.44	-0.560953	0.086188	-6.50849	7.59e-11	7.68e-09
ASCC3	ENSG00000112249.14	729.506	-0.644299	0.0995647	-6.47116	9.73e-11	9.77e-09
DUSP2	ENSG00000158050.5	246.994	-2.0035	0.310279	-6.45708	1.07e-10	1.07e-08
MTHFD1	ENSG00000100714.17	664.004	-0.811135	0.125667	-6.45462	1.08e-10	1.08e-08
GAL	ENSG00000069482.7	203.57	-5.6753	0.880943	-6.44231	1.18e-10	1.16e-08
OCSTAMP	ENSG00000149635.3	32.0012	-3.77564	0.586252	-6.4403	1.19e-10	1.17e-08
AHRR	ENSG00000286169.1	236.56	0.971471	0.151068	6.43069	1.27e-10	1.24e-08
ALPK3	ENSG00000136383.6	28.8154	-4.45001	0.695494	-6.39835	1.57e-10	1.52e-08
TIMP3	ENSG00000100234.11	314.572	-4.11354	0.643486	-6.39258	1.63e-10	1.57e-08
KIAA1324L	ENSG00000164659.15	32.613	3.1561	0.494419	6.38347	1.73e-10	1.66e-08
PMFBP1	ENSG00000118557.16	69.6007	-1.83842	0.288092	-6.38137	1.76e-10	1.67e-08
YWHAG	ENSG00000170027.7	1803.7	-0.506847	0.0797358	-6.35658	2.06e-10	1.95e-08
PPARD	ENSG00000112033.14	228.377	-0.959185	0.15119	-6.34423	2.24e-10	2.1e-08
LIF	ENSG00000128342.5	37.1215	-4.39006	0.69232	-6.34109	2.28e-10	2.13e-08
KLHDC8B	ENSG00000185909.15	709.481	0.788631	0.124524	6.33317	2.4e-10	2.23e-08
CUL2	ENSG00000108094.15	419.459	-0.751769	0.11878	-6.32911	2.47e-10	2.28e-08
HPSE	ENSG00000173083.15	1364.62	1.00127	0.158451	6.31914	2.63e-10	2.42e-08
IDI1	ENSG00000067064.11	507.271	-0.71793	0.113809	-6.3082	2.82e-10	2.58e-08
CUX1	ENSG00000257923.11	813.89	0.603472	0.0959126	6.29189	3.14e-10	2.85e-08
HK2	ENSG00000159399.10	1233.17	-0.763	0.121401	-6.28497	3.28e-10	2.96e-08
HMGCR	ENSG00000113161.16	993.044	-0.942051	0.150465	-6.26093	3.83e-10	3.44e-08
C11orf45	ENSG00000174370.10	239.233	-2.1269	0.341036	-6.2366	4.47e-10	3.99e-08
APOL2	ENSG00000128335.14	686.052	-1.11452	0.179284	-6.2165	5.08e-10	4.52e-08
CMTM6	ENSG00000091317.8	1491.56	-0.521033	0.0839546	-6.20613	5.43e-10	4.8e-08
CD93	ENSG00000125810.10	608.673	1.0475	0.168851	6.20373	5.51e-10	4.84e-08
PCK2	ENSG00000100889.12	868.207	-0.657235	0.106111	-6.19387	5.87e-10	5.13e-08
PSMD14	ENSG00000115233.12	625.735	-0.639377	0.103313	-6.18876	6.06e-10	5.27e-08
ARL4C	ENSG00000188042.8	660.527	0.847546	0.136973	6.1877	6.11e-10	5.28e-08
NOTCH1	ENSG00000148400.12	429.802	0.836931	0.135476	6.17771	6.5e-10	5.59e-08
GALNT14	ENSG00000158089.15	143.615	2.25856	0.366107	6.16914	6.87e-10	5.85e-08
ZNF358	ENSG00000198816.7	221.439	1.03315	0.167507	6.16782	6.92e-10	5.86e-08
TM4SF19	ENSG00000145107.15	2440.68	-2.67143	0.433339	-6.16475	7.06e-10	5.94e-08
SAPCD2	ENSG00000186193.9	39.5064	-2.27693	0.370064	-6.1528	7.61e-10	6.37e-08
TNC	ENSG00000041982.16	19.8357	-3.44768	0.564255	-6.11015	9.95e-10	8.29e-08
IL17RA	ENSG00000177663.14	1849.8	-0.676213	0.111405	-6.06986	1.28e-09	1.05e-07
ZFP36L1	ENSG00000185650.10	821.603	0.629255	0.103686	6.06885	1.29e-09	1.05e-07
PSD3	ENSG00000156011.17	259.19	-2.02894	0.334329	-6.0687	1.29e-09	1.05e-07
LILRA5	ENSG00000187116.14	831.445	0.77369	0.127507	6.06782	1.3e-09	1.05e-07
SPSB1	ENSG00000171621.14	215.023	-2.04279	0.337563	-6.05158	1.43e-09	1.16e-07
ALCAM	ENSG00000170017.12	1323.63	-1.42309	0.235362	-6.04637	1.48e-09	1.19e-07
TRIM47	ENSG00000132481.7	543.593	0.761996	0.126033	6.04599	1.48e-09	1.19e-07
SH3BP5	ENSG00000131370.16	576.653	-0.927869	0.153685	-6.03746	1.57e-09	1.25e-07
AP1B1	ENSG00000100280.16	4850.41	0.64396	0.10678	6.03073	1.63e-09	1.29e-07
MAEA	ENSG00000090316.16	1063.53	0.889239	0.147607	6.02438	1.7e-09	1.34e-07
NFE2L3	ENSG00000050344.9	121.101	-1.54295	0.256141	-6.02381	1.7e-09	1.34e-07
GAA	ENSG00000171298.13	1964.95	0.591262	0.0981977	6.02113	1.73e-09	1.35e-07
SLC2A3	ENSG00000059804.16	1424.04	-1.08534	0.180288	-6.02	1.74e-09	1.35e-07
ICAM2	ENSG00000108622.11	161.479	1.02971	0.171136	6.01695	1.78e-09	1.37e-07
HLA-DQA1	ENSG00000196735.13	2875.57	-2.54167	0.422865	-6.0106	1.85e-09	1.42e-07
SQLE	ENSG00000104549.12	398.58	-0.934536	0.155489	-6.01029	1.85e-09	1.42e-07
SLC41A2	ENSG00000136052.9	253.011	-0.902176	0.15022	-6.00571	1.9e-09	1.45e-07
RGS1	ENSG00000090104.12	162.589	-2.28339	0.380396	-6.00267	1.94e-09	1.47e-07
PIK3R5	ENSG00000141506.13	2400.82	0.696194	0.115981	6.00265	1.94e-09	1.47e-07
IQGAP3	ENSG00000183856.11	169.645	-2.25041	0.375	-6.00109	1.96e-09	1.47e-07
FADS1	ENSG00000149485.19	882.177	-0.870688	0.145135	-5.99917	1.98e-09	1.48e-07
IARS1	ENSG00000196305.17	1450.37	-1.02566	0.171083	-5.99506	2.03e-09	1.51e-07
RAB1A	ENSG00000138069.18	1136.74	-0.545329	0.0909876	-5.99345	2.05e-09	1.52e-07
APOL4	ENSG00000100336.17	51.1058	-6.45494	1.0783	-5.98622	2.15e-09	1.58e-07
NUMB	ENSG00000133961.20	1136.19	-1.15633	0.193729	-5.96881	2.39e-09	1.75e-07
KCNN4	ENSG00000104783.14	271.103	-1.56518	0.262923	-5.95299	2.63e-09	1.92e-07
STIP1	ENSG00000168439.16	1321.39	-0.779352	0.13092	-5.9529	2.63e-09	1.92e-07
LDLR	ENSG00000130164.14	555.744	-1.13641	0.190942	-5.9516	2.66e-09	1.92e-07
SEMA6B	ENSG00000167680.16	1009.04	1.27446	0.214437	5.94329	2.79e-09	2.01e-07
ACACB	ENSG00000076555.15	168.538	1.10366	0.185748	5.94173	2.82e-09	2.02e-07
NOL4L	ENSG00000197183.14	118.306	1.20759	0.203309	5.9397	2.86e-09	2.04e-07
PPA1	ENSG00000180817.12	216.331	-1.06163	0.179003	-5.9308	3.01e-09	2.14e-07
MYBPH	ENSG00000133055.9	18.6417	-7.03886	1.18909	-5.91951	3.23e-09	2.28e-07
TOMM40	ENSG00000130204.13	372.878	-1.09623	0.185197	-5.91924	3.23e-09	2.28e-07
NMRK2	ENSG00000077009.13	22.4356	-4.34409	0.73446	-5.91467	3.33e-09	2.33e-07
ASPHD1	ENSG00000174939.11	23.7621	-4.44642	0.751787	-5.91447	3.33e-09	2.33e-07
RAC2	ENSG00000128340.15	1081.45	-1.10488	0.187121	-5.90462	3.53e-09	2.46e-07
EFR3B	ENSG00000084710.14	28.0563	-3.078	0.521633	-5.9007	3.62e-09	2.51e-07
FRRS1	ENSG00000156869.13	308.165	-0.800384	0.135873	-5.89069	3.85e-09	2.65e-07
CALM3	ENSG00000160014.17	4660.98	-0.538449	0.0916325	-5.87617	4.2e-09	2.88e-07
INSIG1	ENSG00000186480.13	1190.19	-0.667289	0.113817	-5.86284	4.55e-09	3.11e-07
FDPS	ENSG00000160752.14	701.379	-0.625615	0.106878	-5.85356	4.81e-09	3.28e-07
PDLIM4	ENSG00000131435.13	31.28	-3.77504	0.645397	-5.84917	4.94e-09	3.35e-07
ITGB1BP1	ENSG00000119185.12	544.23	-1.03402	0.177071	-5.83957	5.23e-09	3.52e-07
SLC48A1	ENSG00000211584.14	1731.75	0.679108	0.116745	5.81703	5.99e-09	4.01e-07
HPGDS	ENSG00000163106.11	108.152	-1.99281	0.343252	-5.80567	6.41e-09	4.28e-07
TIE1	ENSG00000066056.14	39.686	-3.27172	0.563926	-5.80168	6.57e-09	4.36e-07
DNM3	ENSG00000197959.14	98.6968	1.42978	0.246633	5.7972	6.74e-09	4.45e-07
TGM2	ENSG00000198959.12	878.664	-2.59493	0.447644	-5.79686	6.76e-09	4.45e-07
ARRDC4	ENSG00000140450.9	205.351	-1.19843	0.206942	-5.79115	6.99e-09	4.57e-07
RASGRP2	ENSG00000068831.19	282.715	1.04234	0.180055	5.78903	7.08e-09	4.61e-07
SLC47A1	ENSG00000142494.13	627.515	1.11632	0.193249	5.77661	7.62e-09	4.94e-07
KRT72	ENSG00000170486.11	35.3744	2.74219	0.474793	5.77555	7.67e-09	4.95e-07
CAMK2B	ENSG00000058404.20	12.4796	-7.1917	1.24664	-5.76887	7.98e-09	5.13e-07
SORT1	ENSG00000134243.12	831.169	-0.856774	0.14926	-5.74015	9.46e-09	6.03e-07
TUBB6	ENSG00000176014.13	543.5	-1.2224	0.213098	-5.73633	9.68e-09	6.15e-07
SPARC	ENSG00000113140.11	968.332	-1.27665	0.222805	-5.7299	1e-08	6.36e-07
MBOAT1	ENSG00000172197.11	414.427	-0.785138	0.137132	-5.72544	1.03e-08	6.5e-07
SERPINE1	ENSG00000106366.9	44.5035	-2.45677	0.431272	-5.69656	1.22e-08	7.68e-07
ASB2	ENSG00000100628.12	30.7597	-3.29496	0.579068	-5.69011	1.27e-08	7.94e-07
GGA2	ENSG00000103365.15	3138.07	0.506057	0.088951	5.68917	1.28e-08	7.95e-07
NCAPH	ENSG00000121152.10	328.385	-2.85755	0.502381	-5.68802	1.29e-08	7.98e-07
ARAP3	ENSG00000120318.16	33.4733	-2.63773	0.46422	-5.68208	1.33e-08	8.23e-07
FGD4	ENSG00000139132.14	607.497	-0.814727	0.143529	-5.67639	1.38e-08	8.47e-07
RAB3IL1	ENSG00000167994.13	494.547	0.77115	0.135867	5.67577	1.38e-08	8.47e-07
FANCA	ENSG00000187741.15	87.2463	-1.32109	0.2333	-5.66262	1.49e-08	9.11e-07
SPOCD1	ENSG00000134668.12	221.059	-4.00631	0.707635	-5.66154	1.5e-08	9.14e-07
CIR1	ENSG00000138433.16	313.278	-1.33452	0.235849	-5.65836	1.53e-08	9.27e-07
RGS16	ENSG00000143333.7	27.2418	-2.80072	0.495403	-5.6534	1.57e-08	9.51e-07
HSPD1	ENSG00000144381.17	1588.52	-0.464068	0.0823067	-5.63828	1.72e-08	1.03e-06
CCNA1	ENSG00000133101.10	21.0778	-4.14984	0.736059	-5.63791	1.72e-08	1.03e-06
MEP1A	ENSG00000112818.10	25.8791	-2.64159	0.468816	-5.6346	1.75e-08	1.04e-06
DSC2	ENSG00000134755.17	182.029	1.36209	0.241824	5.63259	1.78e-08	1.05e-06
EVC	ENSG00000072840.13	161.533	1.28215	0.227743	5.62981	1.8e-08	1.07e-06
MRTO4	ENSG00000053372.5	190.394	-1.10743	0.197184	-5.6162	1.95e-08	1.15e-06
PRKY	ENSG00000099725.14	67.0145	7.64434	1.36247	5.61065	2.02e-08	1.18e-06
ERAP1	ENSG00000164307.13	1843.89	-0.548279	0.0978388	-5.6039	2.1e-08	1.23e-06
PKM	ENSG00000067225.18	14395.6	-0.385126	0.0688403	-5.59448	2.21e-08	1.29e-06
ADAP2	ENSG00000184060.11	2279.34	0.600273	0.107583	5.57961	2.41e-08	1.4e-06
BLK	ENSG00000136573.14	49.5489	1.77521	0.318208	5.57879	2.42e-08	1.4e-06
HS3ST1	ENSG00000002587.10	176.993	2.02489	0.36311	5.57652	2.45e-08	1.41e-06
ARPIN	ENSG00000242498.8	844.534	0.793731	0.142587	5.56663	2.6e-08	1.49e-06
TBXAS1	ENSG00000059377.17	1787.36	0.608358	0.109337	5.56404	2.64e-08	1.51e-06
SLC27A3	ENSG00000143554.14	105.307	-1.63304	0.293698	-5.56026	2.69e-08	1.54e-06
LYNX1	ENSG00000180155.20	93.7924	1.26788	0.228335	5.55271	2.81e-08	1.6e-06
HSDL2	ENSG00000119471.15	415.427	0.839912	0.151345	5.54964	2.86e-08	1.62e-06
GDI2	ENSG00000057608.17	3048.17	-0.452725	0.0816636	-5.54378	2.96e-08	1.67e-06
SSTR2	ENSG00000180616.9	37.5239	-2.79416	0.504377	-5.53983	3.03e-08	1.7e-06
PTGFRN	ENSG00000134247.10	606.854	1.05285	0.190234	5.53452	3.12e-08	1.75e-06
RGS20	ENSG00000147509.14	19.0552	-4.7112	0.851921	-5.5301	3.2e-08	1.79e-06
AFAP1L1	ENSG00000157510.14	322.791	-4.27343	0.775114	-5.5133	3.52e-08	1.96e-06
PFKFB3	ENSG00000170525.21	2931.46	0.927392	0.168264	5.51153	3.56e-08	1.97e-06
SLC35F2	ENSG00000110660.15	54.4207	-1.90958	0.346567	-5.51	3.59e-08	1.98e-06
ADGRG6	ENSG00000112414.15	30.7256	-2.3988	0.436439	-5.4963	3.88e-08	2.13e-06
TNKS1BP1	ENSG00000149115.14	162.379	-1.06339	0.193474	-5.49627	3.88e-08	2.13e-06
OTUB2	ENSG00000089723.10	79.6185	-1.71008	0.311155	-5.49592	3.89e-08	2.13e-06
FCGBP	ENSG00000275395.6	291.465	-1.14765	0.208938	-5.4928	3.96e-08	2.16e-06
DRAXIN	ENSG00000162490.7	29.0561	-2.77276	0.504952	-5.49113	3.99e-08	2.17e-06
DHCR24	ENSG00000116133.13	2158.12	-0.724082	0.13198	-5.4863	4.1e-08	2.22e-06
CD79B	ENSG00000007312.12	91.154	1.82834	0.334154	5.47156	4.46e-08	2.41e-06
HSPA5	ENSG00000044574.8	2211.49	-0.622547	0.11383	-5.4691	4.52e-08	2.43e-06
NISCH	ENSG00000010322.16	1002.93	0.669997	0.122562	5.46662	4.59e-08	2.46e-06
SOAT1	ENSG00000057252.13	2796.87	-0.69676	0.127556	-5.4624	4.7e-08	2.5e-06
IL1RN	ENSG00000136689.18	816.929	-3.24051	0.59327	-5.46212	4.7e-08	2.5e-06
PHACTR2	ENSG00000112419.14	637.338	-0.908955	0.166623	-5.45517	4.89e-08	2.6e-06
ELOC	ENSG00000154582.16	316.242	-0.863931	0.158504	-5.45055	5.02e-08	2.66e-06
HPGD	ENSG00000164120.14	26.2014	-3.37106	0.618711	-5.44852	5.08e-08	2.68e-06
TAP2	ENSG00000204267.15	517.098	-1.54753	0.28469	-5.43584	5.45e-08	2.87e-06
GSAP	ENSG00000186088.16	887.696	-0.575618	0.105998	-5.43045	5.62e-08	2.94e-06
POMP	ENSG00000132963.8	545.473	-0.677923	0.124925	-5.42664	5.74e-08	3e-06
SEPTIN11	ENSG00000138758.11	703.055	-0.810294	0.149474	-5.42096	5.93e-08	3.07e-06
ZC3H12D	ENSG00000178199.14	326.641	0.717694	0.13283	5.40308	6.55e-08	3.38e-06
PFKP	ENSG00000067057.17	418.554	-0.833839	0.154333	-5.40286	6.56e-08	3.38e-06
TMC8	ENSG00000167895.15	729.881	0.680213	0.125931	5.40149	6.61e-08	3.39e-06
RCN3	ENSG00000142552.8	145.919	1.11676	0.206895	5.39773	6.75e-08	3.45e-06
HSP90AB1	ENSG00000096384.20	4949.34	-0.371744	0.0688712	-5.39767	6.75e-08	3.45e-06
DEK	ENSG00000124795.17	847.491	-0.661134	0.122668	-5.38964	7.06e-08	3.58e-06
SIGLEC10	ENSG00000142512.15	155.191	1.47366	0.273543	5.38729	7.15e-08	3.62e-06
CD22	ENSG00000012124.17	1061.13	1.23302	0.229082	5.38245	7.35e-08	3.7e-06
SCN1B	ENSG00000105711.12	296.313	0.949531	0.176478	5.38046	7.43e-08	3.73e-06
TPI1	ENSG00000111669.15	3230.35	-0.499429	0.0928311	-5.37998	7.45e-08	3.73e-06
AC034102.2	ENSG00000257411.2	5.44046	-19.5351	3.63724	-5.37086	7.84e-08	3.91e-06
SQOR	ENSG00000137767.14	2170.6	-0.497867	0.0930483	-5.35063	8.76e-08	4.35e-06
SRC	ENSG00000197122.11	575.272	-0.577205	0.107951	-5.34691	8.95e-08	4.43e-06
SLC9A7	ENSG00000065923.10	670.14	-1.06188	0.198973	-5.33682	9.46e-08	4.66e-06
SLCO4A1	ENSG00000101187.16	29.0229	-2.54473	0.477011	-5.33474	9.57e-08	4.7e-06
MICA	ENSG00000204520.14	107.467	1.02097	0.191825	5.32242	1.02e-07	5.02e-06
TXNIP	ENSG00000265972.6	4222.61	-0.66732	0.125461	-5.31894	1.04e-07	5.1e-06
ASAP1	ENSG00000153317.15	728.872	-0.650805	0.122539	-5.31102	1.09e-07	5.31e-06
LIMS1	ENSG00000169756.16	1534.76	-0.601268	0.11324	-5.30969	1.1e-07	5.33e-06
KIAA1671	ENSG00000197077.13	77.0588	1.8193	0.342849	5.30641	1.12e-07	5.41e-06
RHOC	ENSG00000155366.16	683.329	-1.14676	0.216297	-5.3018	1.15e-07	5.54e-06
SELENOI	ENSG00000138018.18	260.117	-0.732477	0.13828	-5.29707	1.18e-07	5.66e-06
TM4SF19-TCTEX1D2	ENSG00000273331.1	68.0215	-2.31221	0.436827	-5.29319	1.2e-07	5.77e-06
COPB1	ENSG00000129083.12	1595.1	-0.44216	0.0835681	-5.29101	1.22e-07	5.82e-06
HLA-DQB2	ENSG00000232629.9	19.0942	5.79813	1.0963	5.28884	1.23e-07	5.87e-06
UBTD1	ENSG00000165886.5	211.447	-1.14592	0.216724	-5.28746	1.24e-07	5.9e-06
FAM81A	ENSG00000157470.12	16.7029	-3.0879	0.584686	-5.28129	1.28e-07	6.05e-06
MMP7	ENSG00000137673.9	301.7	-6.08267	1.15233	-5.27859	1.3e-07	6.12e-06
MAF	ENSG00000178573.7	892.016	-0.752302	0.142606	-5.27539	1.32e-07	6.19e-06
AL121845.2	ENSG00000273047.1	7.92823	-6.53617	1.2397	-5.27236	1.35e-07	6.28e-06
KIF16B	ENSG00000089177.18	576.844	0.621006	0.118166	5.25536	1.48e-07	6.86e-06
ABHD12	ENSG00000100997.20	2599.5	0.440639	0.0838841	5.25295	1.5e-07	6.93e-06
CIDEB	ENSG00000136305.11	276.013	0.876286	0.166933	5.24932	1.53e-07	7.05e-06
PPIA	ENSG00000196262.14	6164.66	-0.395986	0.0754542	-5.24802	1.54e-07	7.08e-06
MAP7	ENSG00000135525.18	110.063	-1.05048	0.200418	-5.24146	1.59e-07	7.32e-06
CAT	ENSG00000121691.7	1824.55	0.510274	0.0974142	5.23818	1.62e-07	7.43e-06
EAF1	ENSG00000144597.14	752.15	-0.610508	0.116794	-5.22722	1.72e-07	7.86e-06
SCIMP	ENSG00000161929.15	528.038	0.674845	0.129133	5.22599	1.73e-07	7.89e-06
KPNA2	ENSG00000182481.9	788.832	-0.797584	0.152645	-5.2251	1.74e-07	7.9e-06
TFRC	ENSG00000072274.13	6243.79	-0.870407	0.166748	-5.2199	1.79e-07	8.11e-06
P2RY8	ENSG00000182162.11	840.694	0.810333	0.155254	5.21939	1.8e-07	8.11e-06
FAM118A	ENSG00000100376.12	234.674	1.57808	0.302392	5.21867	1.8e-07	8.12e-06
LYZ	ENSG00000090382.7	12241.3	-0.600727	0.115147	-5.21705	1.82e-07	8.16e-06
RPS14	ENSG00000164587.13	3012.65	0.435955	0.0837155	5.20757	1.91e-07	8.57e-06
AKR1E2	ENSG00000165568.18	17.5814	3.13607	0.602607	5.20417	1.95e-07	8.68e-06
MRGPRF	ENSG00000172935.9	15.8832	-5.45572	1.04863	-5.20272	1.96e-07	8.72e-06
RDH11	ENSG00000072042.13	903.226	-0.58581	0.112869	-5.19019	2.1e-07	9.28e-06
MMP12	ENSG00000262406.3	8.88913	-6.69425	1.29079	-5.18618	2.15e-07	9.45e-06
CRABP2	ENSG00000143320.9	315.899	-4.11648	0.793881	-5.18526	2.16e-07	9.47e-06
FPR3	ENSG00000187474.5	8891.62	0.548544	0.106004	5.17476	2.28e-07	9.98e-06
DUSP13	ENSG00000079393.20	13.0395	-4.78295	0.924406	-5.17408	2.29e-07	9.98e-06
NDC80	ENSG00000080986.13	53.2027	-1.72444	0.333292	-5.17397	2.29e-07	9.98e-06
DHRS11	ENSG00000278535.5	38.3212	-2.25525	0.436093	-5.17149	2.32e-07	1.01e-05
IMPA2	ENSG00000141401.12	126.88	1.02389	0.197992	5.17136	2.32e-07	1.01e-05
DNASE1L1	ENSG00000013563.14	584.067	-0.498274	0.096384	-5.16967	2.35e-07	1.01e-05
IGFBP4	ENSG00000141753.7	297.837	0.892013	0.172597	5.16818	2.36e-07	1.02e-05
VWF	ENSG00000110799.13	65.9127	-1.95062	0.378213	-5.15746	2.5e-07	1.08e-05
ST3GAL5	ENSG00000115525.18	690.847	-0.603685	0.117115	-5.15463	2.54e-07	1.09e-05
UBE2J1	ENSG00000198833.7	615.614	-0.650516	0.126258	-5.15226	2.57e-07	1.1e-05
TNFSF14	ENSG00000125735.10	194.459	-3.04218	0.590461	-5.1522	2.57e-07	1.1e-05
DCSTAMP	ENSG00000164935.6	569.372	-2.56292	0.497452	-5.1521	2.58e-07	1.1e-05
ANO10	ENSG00000160746.13	232.565	-0.898093	0.174796	-5.13795	2.78e-07	1.18e-05
MATK	ENSG00000007264.15	400.888	-2.72981	0.5314	-5.13702	2.79e-07	1.18e-05
SLC16A7	ENSG00000118596.12	267.428	0.725806	0.141307	5.13639	2.8e-07	1.18e-05
NPC2	ENSG00000119655.10	9795.34	0.325067	0.0634973	5.11939	3.07e-07	1.29e-05
ALDH2	ENSG00000111275.13	1109.94	0.652431	0.127701	5.10904	3.24e-07	1.36e-05
LONRF1	ENSG00000154359.13	86.2431	-1.21512	0.238061	-5.10426	3.32e-07	1.39e-05
DIAPH3	ENSG00000139734.19	29.9729	-1.99279	0.390904	-5.09789	3.43e-07	1.43e-05
MPEG1	ENSG00000197629.6	8145.82	0.589739	0.115727	5.09595	3.47e-07	1.44e-05
NQO1	ENSG00000181019.13	1376.38	0.612675	0.120432	5.08732	3.63e-07	1.5e-05
GOLGA8B	ENSG00000215252.11	411.939	0.81239	0.159849	5.08222	3.73e-07	1.54e-05
MYOZ1	ENSG00000177791.12	10.9382	-6.26323	1.23333	-5.07832	3.81e-07	1.57e-05
SETD7	ENSG00000145391.13	866.066	-0.457208	0.0901776	-5.07009	3.98e-07	1.63e-05
ABCE1	ENSG00000164163.11	520.022	-0.699555	0.137988	-5.06969	3.98e-07	1.63e-05
MYADM	ENSG00000179820.16	134.606	-1.25018	0.246792	-5.06573	4.07e-07	1.66e-05
MAP3K8	ENSG00000107968.10	460.819	0.667451	0.131759	5.0657	4.07e-07	1.66e-05
ARHGAP31	ENSG00000031081.11	1233.89	-0.502434	0.0991988	-5.06492	4.09e-07	1.66e-05
C1S	ENSG00000182326.15	36.3079	-4.01321	0.792677	-5.06286	4.13e-07	1.68e-05
DGKD	ENSG00000077044.10	330.513	0.621336	0.122885	5.05626	4.28e-07	1.73e-05
GJA5	ENSG00000265107.3	9.31887	-6.77124	1.33984	-5.05377	4.33e-07	1.75e-05
LRP5	ENSG00000162337.12	47.907	2.30417	0.456174	5.05107	4.39e-07	1.77e-05
CAVIN1	ENSG00000177469.13	19.2716	-2.55947	0.506752	-5.05074	4.4e-07	1.77e-05
PSMA3	ENSG00000100567.13	431.298	-0.730092	0.144968	-5.03623	4.75e-07	1.9e-05
CAPZA1	ENSG00000116489.13	2311.09	-0.438675	0.0871523	-5.03344	4.82e-07	1.92e-05
EMILIN1	ENSG00000138080.14	124.261	-1.99535	0.396602	-5.03111	4.88e-07	1.94e-05
USO1	ENSG00000138768.14	971.063	-0.496561	0.0987131	-5.03035	4.9e-07	1.94e-05
PLS3	ENSG00000102024.18	26.5313	-2.99189	0.597386	-5.0083	5.49e-07	2.17e-05
CCDC149	ENSG00000181982.18	218.559	0.892335	0.178217	5.00701	5.53e-07	2.18e-05
CEBPD	ENSG00000221869.5	357.674	0.794017	0.15874	5.00198	5.67e-07	2.23e-05
VNN1	ENSG00000112299.8	119.849	1.52006	0.303902	5.00182	5.68e-07	2.23e-05
UPP1	ENSG00000183696.14	341.663	-0.888604	0.177727	-4.99983	5.74e-07	2.24e-05
ABLIM2	ENSG00000163995.20	23.5886	2.2709	0.454384	4.99776	5.8e-07	2.26e-05
MMP8	ENSG00000118113.12	47.8756	-2.3293	0.466444	-4.99374	5.92e-07	2.31e-05
NCKAP1	ENSG00000061676.15	49.153	-1.88313	0.377184	-4.99262	5.96e-07	2.31e-05
ADAM15	ENSG00000143537.13	627.523	-0.577752	0.115885	-4.98556	6.18e-07	2.39e-05
RDH10	ENSG00000121039.10	217.495	0.83168	0.167149	4.97569	6.5e-07	2.51e-05
HSP90B1	ENSG00000166598.15	4879.87	-0.501741	0.100841	-4.97557	6.51e-07	2.51e-05
SORL1	ENSG00000137642.13	1655.82	0.644865	0.129659	4.97354	6.57e-07	2.53e-05
CHST11	ENSG00000171310.11	1057.17	-0.60188	0.121156	-4.96781	6.77e-07	2.6e-05
GZF1	ENSG00000125812.16	411.128	0.71544	0.144031	4.96727	6.79e-07	2.6e-05
SEC14L1	ENSG00000129657.16	1085.55	-0.407977	0.0822063	-4.96285	6.95e-07	2.65e-05
RALB	ENSG00000144118.14	779.704	-0.456759	0.0921263	-4.95797	7.12e-07	2.71e-05
PDK4	ENSG00000004799.8	766.066	3.71008	0.748945	4.95374	7.28e-07	2.77e-05
KIF17	ENSG00000117245.12	14.126	-3.61199	0.729211	-4.95328	7.3e-07	2.77e-05
ETV5	ENSG00000244405.8	918.679	0.699196	0.14125	4.95007	7.42e-07	2.81e-05
DDIAS	ENSG00000165490.13	43.7877	-1.76066	0.356297	-4.94154	7.75e-07	2.92e-05
GRB10	ENSG00000106070.19	150.847	1.01421	0.205312	4.93982	7.82e-07	2.94e-05
TMEM220	ENSG00000187824.8	36.8672	1.70244	0.344791	4.93759	7.91e-07	2.97e-05
MRI1	ENSG00000037757.14	256.429	0.635077	0.128706	4.93433	8.04e-07	3.01e-05
CYP19A1	ENSG00000137869.15	112.517	-4.30572	0.873707	-4.9281	8.3e-07	3.1e-05
ARSA	ENSG00000100299.18	488.082	0.655275	0.133041	4.92537	8.42e-07	3.14e-05
IFI30	ENSG00000216490.4	39914.6	0.493007	0.100204	4.92002	8.65e-07	3.21e-05
NPIPB15	ENSG00000196436.8	16.6382	6.50343	1.32224	4.91851	8.72e-07	3.22e-05
MS4A7	ENSG00000166927.13	1944.75	0.888661	0.180788	4.91548	8.86e-07	3.26e-05
RPL34	ENSG00000109475.16	1459.92	0.415413	0.0846493	4.90746	9.23e-07	3.39e-05
TBC1D3E	ENSG00000278599.5	6.75673	-6.30654	1.28749	-4.89833	9.67e-07	3.54e-05
ANO5	ENSG00000171714.11	97.0564	-1.7306	0.353811	-4.89132	1e-06	3.66e-05
CHD3	ENSG00000170004.17	1162.82	0.447865	0.0916831	4.88492	1.03e-06	3.76e-05
RTL10	ENSG00000215012.9	759.076	0.991266	0.202989	4.88335	1.04e-06	3.78e-05
RASL11B	ENSG00000128045.7	12.9794	-4.76037	0.974827	-4.8833	1.04e-06	3.78e-05
RHBDF1	ENSG00000007384.15	52.62	-2.07243	0.424817	-4.87841	1.07e-06	3.86e-05
GOLGA7B	ENSG00000155265.11	100.27	-2.11727	0.434514	-4.87272	1.1e-06	3.95e-05
PRKX	ENSG00000183943.6	711.493	-0.875753	0.179767	-4.8716	1.11e-06	3.96e-05
GPR161	ENSG00000143147.14	26.5967	-2.35549	0.483522	-4.87152	1.11e-06	3.96e-05
TMEM30A	ENSG00000112697.17	1221.36	-0.431179	0.0886311	-4.86487	1.15e-06	4.08e-05
FTL	ENSG00000087086.15	514369	0.666265	0.137049	4.86149	1.17e-06	4.14e-05
PSMA4	ENSG00000041357.16	709.463	-0.695052	0.143049	-4.85884	1.18e-06	4.18e-05
SHCBP1	ENSG00000171241.9	93.2933	-1.51887	0.312709	-4.85713	1.19e-06	4.21e-05
KRT73	ENSG00000186049.8	24.9218	2.48461	0.511685	4.85573	1.2e-06	4.23e-05
ALDOA	ENSG00000149925.20	8524.69	-0.385132	0.0793534	-4.85338	1.21e-06	4.27e-05
APBA1	ENSG00000107282.8	347.889	0.757013	0.156225	4.84566	1.26e-06	4.43e-05
ADIRF	ENSG00000148671.14	44.4167	3.26769	0.674848	4.84211	1.28e-06	4.5e-05
TUBB3	ENSG00000258947.7	16.1478	-3.53084	0.729318	-4.84129	1.29e-06	4.51e-05
APOBEC3B	ENSG00000179750.16	57.4122	-2.0129	0.415995	-4.83876	1.31e-06	4.55e-05
CABLES1	ENSG00000134508.12	179.111	1.05981	0.219529	4.82766	1.38e-06	4.79e-05
TPRA1	ENSG00000163870.16	1420.68	0.677323	0.140314	4.8272	1.38e-06	4.79e-05
RHBDF2	ENSG00000129667.12	332.143	-1.08287	0.224907	-4.81476	1.47e-06	5.07e-05
PRDX2	ENSG00000167815.12	197.648	0.96233	0.200044	4.81058	1.5e-06	5.17e-05
XYLT1	ENSG00000103489.12	220.975	1.32676	0.275964	4.80773	1.53e-06	5.23e-05
MTSS1	ENSG00000170873.18	524.678	0.666156	0.138683	4.80343	1.56e-06	5.33e-05
SLC5A3	ENSG00000198743.7	2480.81	-0.853245	0.177675	-4.80228	1.57e-06	5.35e-05
AK6	ENSG00000085231.14	82.1874	-1.04933	0.218572	-4.80086	1.58e-06	5.38e-05
SLAMF9	ENSG00000162723.10	32.1704	-2.91902	0.608189	-4.79952	1.59e-06	5.41e-05
LRATD2	ENSG00000168672.4	76.7492	1.32196	0.275529	4.79792	1.6e-06	5.44e-05
PDIA3	ENSG00000167004.13	2898.27	-0.487841	0.101721	-4.79585	1.62e-06	5.48e-05
ACADVL	ENSG00000072778.20	2903.3	0.906882	0.189184	4.79364	1.64e-06	5.53e-05
RPL13A	ENSG00000142541.17	8621.04	0.400991	0.083676	4.79219	1.65e-06	5.56e-05
CXADR	ENSG00000154639.19	11.3815	-5.60462	1.17194	-4.78233	1.73e-06	5.83e-05
SYT1	ENSG00000067715.14	24.7148	2.32985	0.48732	4.78094	1.74e-06	5.86e-05
SHTN1	ENSG00000187164.20	773.649	-0.686379	0.143587	-4.78022	1.75e-06	5.86e-05
PAM	ENSG00000145730.20	456.67	0.596315	0.124802	4.77808	1.77e-06	5.91e-05
PTPN7	ENSG00000143851.15	387.388	-1.15429	0.241623	-4.77723	1.78e-06	5.93e-05
WASHC4	ENSG00000136051.14	1690.18	-0.427003	0.0894219	-4.77515	1.8e-06	5.98e-05
KIF11	ENSG00000138160.6	156.183	-1.32473	0.277658	-4.7711	1.83e-06	6.09e-05
TPST2	ENSG00000128294.16	945.665	0.511838	0.107408	4.76534	1.89e-06	6.24e-05
PDCD1LG2	ENSG00000197646.8	394.729	-1.35231	0.283781	-4.76532	1.89e-06	6.24e-05
CCL24	ENSG00000106178.6	10.4872	-4.05806	0.851909	-4.76349	1.9e-06	6.28e-05
DOCK4	ENSG00000128512.23	2603.16	0.476782	0.100101	4.763	1.91e-06	6.28e-05
STT3B	ENSG00000163527.10	1624.79	-0.38766	0.0814943	-4.75689	1.97e-06	6.46e-05
ARHGAP27	ENSG00000159314.11	743.166	0.547658	0.11525	4.75192	2.01e-06	6.61e-05
AATK	ENSG00000181409.14	190.633	1.42746	0.300549	4.74952	2.04e-06	6.68e-05
CHD1L	ENSG00000131778.19	567.27	-0.668065	0.140791	-4.74508	2.08e-06	6.81e-05
LCP1	ENSG00000136167.14	14786.6	-0.759049	0.160087	-4.74148	2.12e-06	6.92e-05
COL8A2	ENSG00000171812.13	321.054	-2.90536	0.613251	-4.73764	2.16e-06	7.04e-05
DLD	ENSG00000091140.14	737.501	-0.469442	0.0991419	-4.73505	2.19e-06	7.11e-05
FCGR1B	ENSG00000198019.13	233.608	-0.918365	0.19405	-4.73262	2.22e-06	7.18e-05
FAM193B	ENSG00000146067.16	315.515	0.621325	0.131355	4.73012	2.24e-06	7.26e-05
FAH	ENSG00000103876.12	692.797	0.689862	0.145908	4.72805	2.27e-06	7.32e-05
PSMA1	ENSG00000129084.17	793.093	-0.508748	0.107611	-4.72765	2.27e-06	7.32e-05
PCARE	ENSG00000179270.7	7.10405	-6.38014	1.34989	-4.7264	2.29e-06	7.35e-05
DMXL1	ENSG00000172869.14	2880.96	-0.486305	0.103151	-4.71451	2.42e-06	7.77e-05
BUB1	ENSG00000169679.15	134.32	-1.31854	0.27973	-4.71361	2.43e-06	7.79e-05
PFDN5	ENSG00000123349.14	2077.45	0.503733	0.106886	4.71279	2.44e-06	7.81e-05
C1orf162	ENSG00000143110.11	973.245	0.55275	0.11735	4.71026	2.47e-06	7.89e-05
ABCA1	ENSG00000165029.16	2548.43	-0.548247	0.11646	-4.70758	2.51e-06	7.98e-05
ATF3	ENSG00000162772.17	274.892	-2.45744	0.522626	-4.70211	2.57e-06	8.18e-05
DLGAP5	ENSG00000126787.13	84.3921	-1.75481	0.373251	-4.70141	2.58e-06	8.18e-05
STON2	ENSG00000140022.13	220.62	-2.68243	0.570583	-4.7012	2.59e-06	8.18e-05
CTDSPL	ENSG00000144677.15	154.343	-0.962729	0.204912	-4.69825	2.62e-06	8.27e-05
LPGAT1	ENSG00000123684.13	867.589	-0.468943	0.0998507	-4.69644	2.65e-06	8.33e-05
ALDH1A2	ENSG00000128918.15	31.004	-2.82244	0.601327	-4.69368	2.68e-06	8.43e-05
ENO1	ENSG00000074800.16	13084.8	-0.359816	0.0766886	-4.69191	2.71e-06	8.48e-05
ATP2A2	ENSG00000174437.17	1667.83	-0.578452	0.123447	-4.68583	2.79e-06	8.72e-05
RRAGC	ENSG00000116954.8	359.487	-0.633291	0.135176	-4.68493	2.8e-06	8.74e-05
ITGA3	ENSG00000005884.18	407.789	-2.2913	0.489135	-4.68439	2.81e-06	8.75e-05
MDM2	ENSG00000135679.25	877.517	-0.438732	0.0937567	-4.67947	2.88e-06	8.94e-05
ZHX2	ENSG00000178764.8	132.74	0.917158	0.196115	4.67663	2.92e-06	9.04e-05
SCG5	ENSG00000166922.8	26.3321	-3.68279	0.787508	-4.67651	2.92e-06	9.04e-05
LILRB2	ENSG00000131042.14	911.559	0.558205	0.119498	4.67124	2.99e-06	9.26e-05
PEA15	ENSG00000162734.12	874.679	-0.911859	0.195577	-4.66241	3.13e-06	9.64e-05
LAYN	ENSG00000204381.11	12.0191	-5.69097	1.22115	-4.66035	3.16e-06	9.7e-05
WWTR1	ENSG00000018408.14	12.5283	-5.09661	1.09406	-4.65843	3.19e-06	9.75e-05
MCM7	ENSG00000166508.18	320.94	-0.811135	0.174128	-4.65828	3.19e-06	9.75e-05
APOC2	ENSG00000234906.10	103.469	-1.72334	0.370255	-4.65447	3.25e-06	9.89e-05
HIP1	ENSG00000127946.17	356.971	0.677874	0.145661	4.65379	3.26e-06	9.89e-05
NME1-NME2	ENSG00000011052.21	5.87914	-6.0998	1.31074	-4.65372	3.26e-06	9.89e-05
TIMM17A	ENSG00000134375.11	371.651	-0.5935	0.12758	-4.65199	3.29e-06	9.95e-05
MMADHC	ENSG00000168288.13	652.012	-0.468249	0.100668	-4.65142	3.3e-06	9.96e-05
KLRG1	ENSG00000139187.10	114.266	-1.2652	0.272178	-4.64843	3.34e-06	0.00010069
SGSH	ENSG00000181523.13	746.746	0.516178	0.111097	4.64618	3.38e-06	0.000101594
SULF2	ENSG00000196562.14	152.416	-2.89158	0.622406	-4.64582	3.39e-06	0.000101594
PITHD1	ENSG00000057757.10	2059.62	0.51023	0.109861	4.64434	3.41e-06	0.000102133
TTC23	ENSG00000103852.13	166.678	-0.844058	0.181799	-4.6428	3.44e-06	0.000102705
TMEM63C	ENSG00000165548.11	17.4018	2.71971	0.586195	4.6396	3.49e-06	0.000103925
ABCG2	ENSG00000118777.12	45.2316	-2.11694	0.456369	-4.63865	3.51e-06	0.000104207
CD40	ENSG00000101017.14	442.029	-1.11394	0.240234	-4.63691	3.54e-06	0.000104895
DNTTIP1	ENSG00000101457.13	168.757	-0.871202	0.188022	-4.63351	3.6e-06	0.00010644
DDX60L	ENSG00000181381.13	941.151	-0.631123	0.13629	-4.63073	3.64e-06	0.000107571
PRRC2B	ENSG00000130723.20	1159.93	0.470683	0.101647	4.63056	3.65e-06	0.000107571
RAP1B	ENSG00000127314.18	1219.43	-0.397081	0.085888	-4.62324	3.78e-06	0.000111233
AQP9	ENSG00000103569.10	499.681	-2.39271	0.517662	-4.62214	3.8e-06	0.000111621
SH3PXD2A	ENSG00000107957.16	406.378	1.21655	0.263391	4.6188	3.86e-06	0.000113225
RIPOR2	ENSG00000111913.19	682.482	0.675051	0.146362	4.61219	3.98e-06	0.000116675
ELL2	ENSG00000118985.16	1330.14	0.707581	0.15343	4.61177	3.99e-06	0.000116701
MYBL2	ENSG00000101057.16	101.564	-1.40781	0.305294	-4.61132	4e-06	0.000116742
CLEC11A	ENSG00000105472.13	127.81	0.911588	0.197728	4.6103	4.02e-06	0.000117099
FAM174B	ENSG00000185442.13	121.257	1.17471	0.25496	4.60741	4.08e-06	0.000118523
CLEC10A	ENSG00000132514.13	117.498	1.54324	0.335177	4.60426	4.14e-06	0.000120113
LRP6	ENSG00000070018.9	27.0299	1.89621	0.411943	4.60309	4.16e-06	0.000120574
EPB41L3	ENSG00000082397.17	1891.47	0.399183	0.0867701	4.60047	4.22e-06	0.000121883
SRGAP3	ENSG00000196220.16	238.445	0.636283	0.138378	4.59815	4.26e-06	0.000123023
ADAMTS15	ENSG00000166106.3	8.07134	-5.81842	1.26633	-4.59472	4.33e-06	0.00012484
SLC38A2	ENSG00000134294.14	1293.58	-0.556714	0.121184	-4.59394	4.35e-06	0.000125085
STMN1	ENSG00000117632.23	984.639	0.821849	0.178946	4.59273	4.37e-06	0.000125592
AURKA	ENSG00000087586.17	160.446	-0.876946	0.191305	-4.58403	4.56e-06	0.000130702
ZNF641	ENSG00000167528.12	532.857	0.584754	0.12767	4.5802	4.65e-06	0.000132878
RAN	ENSG00000132341.12	1558.08	-0.447147	0.0976753	-4.57789	4.7e-06	0.000134114
TOM1	ENSG00000100284.21	1397.95	0.5794	0.12669	4.57336	4.8e-06	0.000136808
ZNF334	ENSG00000198185.11	12.1152	-3.21952	0.704358	-4.57086	4.86e-06	0.000138207
PSMC1	ENSG00000100764.14	903.932	-0.384888	0.0842805	-4.56675	4.95e-06	0.000140579
CDC27	ENSG00000004897.12	628.678	-0.459836	0.100697	-4.56655	4.96e-06	0.000140579
PID1	ENSG00000153823.18	162.01	1.23532	0.270569	4.56564	4.98e-06	0.000140941
MVD	ENSG00000167508.12	416.165	-0.694754	0.15223	-4.56385	5.02e-06	0.000141895
STRIP2	ENSG00000128578.10	43.8841	-1.65987	0.363794	-4.56266	5.05e-06	0.000142307
CCNA2	ENSG00000145386.10	123.696	-1.45106	0.318065	-4.56214	5.06e-06	0.000142307
LIMK1	ENSG00000106683.15	1121.15	-0.741589	0.162553	-4.56214	5.06e-06	0.000142307
USP12	ENSG00000152484.14	411.476	-0.709252	0.155494	-4.56128	5.08e-06	0.000142644
TK1	ENSG00000167900.12	118.968	-1.58807	0.348672	-4.55461	5.25e-06	0.000146991
CST3	ENSG00000101439.9	5719.66	0.485347	0.106659	4.55044	5.35e-06	0.000149514
MXD1	ENSG00000059728.11	696.645	0.712524	0.156594	4.55015	5.36e-06	0.000149514
METTL1	ENSG00000037897.17	62.2628	-1.23251	0.270886	-4.54993	5.37e-06	0.000149514
BMF	ENSG00000104081.14	1105.15	0.775217	0.170542	4.54561	5.48e-06	0.000152352
BZW1	ENSG00000082153.18	1719.33	-0.455672	0.100279	-4.54404	5.52e-06	0.000153222
CLDN12	ENSG00000157224.16	81.0356	-1.25414	0.276041	-4.54332	5.54e-06	0.000153481
OTUD4	ENSG00000164164.17	424.416	-0.510553	0.112398	-4.54237	5.56e-06	0.000153913
LILRB4	ENSG00000186818.12	2860.73	-0.695493	0.153183	-4.54027	5.62e-06	0.000155189
SLFN5	ENSG00000166750.10	1421.24	0.626787	0.13835	4.53044	5.89e-06	0.000162107
RPS27	ENSG00000177954.14	3990.75	0.41532	0.0916752	4.53034	5.89e-06	0.000162107
TXNRD3	ENSG00000197763.17	82.5087	1.09507	0.241775	4.5293	5.92e-06	0.000162631
IDO1	ENSG00000131203.13	70.0988	-5.35007	1.18134	-4.52883	5.93e-06	0.000162708
TPMT	ENSG00000137364.5	513.724	-0.604051	0.133423	-4.52735	5.97e-06	0.000163577
ARSB	ENSG00000113273.17	1866.48	0.426153	0.0942688	4.52061	6.17e-06	0.000168294
HEXA	ENSG00000213614.9	7779.97	0.421001	0.0932381	4.51534	6.32e-06	0.000172247
GSTP1	ENSG00000084207.18	1920.92	0.593141	0.131592	4.50743	6.56e-06	0.000178493
ATF5	ENSG00000169136.11	317.66	-1.04361	0.231626	-4.5056	6.62e-06	0.000179727
DHRS4L2	ENSG00000187630.17	188.682	-0.74881	0.166277	-4.50337	6.69e-06	0.000181317
DLG5	ENSG00000151208.17	57.6095	1.39584	0.309991	4.50283	6.71e-06	0.00018148
CSPG4	ENSG00000173546.7	10.4701	-5.48566	1.21869	-4.50129	6.75e-06	0.000182485
DEF6	ENSG00000023892.11	559.536	0.683931	0.151991	4.49982	6.8e-06	0.000183138
MT2A	ENSG00000125148.7	70.9267	-2.04768	0.4554	-4.49644	6.91e-06	0.00018571
WDR20	ENSG00000140153.17	241.153	0.595734	0.132576	4.49352	7.01e-06	0.000187623
SRP72	ENSG00000174780.17	617.968	-0.527306	0.117393	-4.49179	7.06e-06	0.000188607
VDAC1	ENSG00000213585.11	1839.94	-0.445341	0.0992113	-4.48881	7.16e-06	0.00019082
KIF20A	ENSG00000112984.12	118.947	-1.72379	0.384037	-4.4886	7.17e-06	0.00019082
TPX2	ENSG00000088325.16	171.165	-1.48531	0.330999	-4.48735	7.21e-06	0.00019162
CA2	ENSG00000104267.10	606.109	-1.02885	0.229637	-4.48036	7.45e-06	0.000197683
GNPDA1	ENSG00000113552.16	2664.74	0.414644	0.0926024	4.47769	7.55e-06	0.000199841
KCTD9	ENSG00000104756.16	163.836	-0.769858	0.171996	-4.47602	7.6e-06	0.000201072
CARD9	ENSG00000187796.15	290.676	0.559789	0.125092	4.47503	7.64e-06	0.000201676
GLTP	ENSG00000139433.10	591.802	0.691146	0.154526	4.47269	7.72e-06	0.000203561
ARNTL2	ENSG00000029153.14	185.24	-0.975243	0.218218	-4.46912	7.85e-06	0.000206647
CLMP	ENSG00000166250.12	16.6222	-2.93863	0.658658	-4.46155	8.14e-06	0.000213741
SLC9A2	ENSG00000115616.3	5.50411	-6.01126	1.34773	-4.46027	8.19e-06	0.00021467
ASF1B	ENSG00000105011.9	99.6308	-1.2309	0.276461	-4.45234	8.49e-06	0.000222028
MSH2	ENSG00000095002.15	160.165	-0.738198	0.16592	-4.44912	8.62e-06	0.000225021
DOT1L	ENSG00000104885.18	252.284	-0.886425	0.199256	-4.44868	8.64e-06	0.000225119
KIF20B	ENSG00000138182.14	118.683	-0.849537	0.191043	-4.44685	8.71e-06	0.000226633
TCL1A	ENSG00000100721.11	73.9393	1.62303	0.36501	4.44654	8.73e-06	0.000226633
ABCC3	ENSG00000108846.16	634.676	0.631742	0.142172	4.44349	8.85e-06	0.000229133
KIF2C	ENSG00000142945.13	100.921	-1.59891	0.360439	-4.436	9.16e-06	0.00023687
HSD17B4	ENSG00000133835.16	2860.94	-0.501355	0.113043	-4.4351	9.2e-06	0.000237092
NDUFA9	ENSG00000139180.11	553.858	-0.474996	0.107122	-4.43416	9.24e-06	0.000237754
NCF4	ENSG00000100365.16	1694.62	0.561612	0.126757	4.43063	9.4e-06	0.000240901
SLC16A10	ENSG00000112394.17	50.6727	-2.17653	0.491315	-4.43002	9.42e-06	0.000241207
ZFYVE26	ENSG00000072121.16	4832.57	0.446042	0.100877	4.42165	9.8e-06	0.000250343
ATP6V1A	ENSG00000114573.10	5430.95	-0.408312	0.0924186	-4.41807	9.96e-06	0.000254122
ALS2CL	ENSG00000178038.17	207.284	1.16369	0.263516	4.416	1.01e-05	0.000256159
ITGB5	ENSG00000082781.12	1571.82	-0.773694	0.175226	-4.41541	1.01e-05	0.000256405
ACACA	ENSG00000278540.5	478.683	-0.527167	0.119401	-4.41511	1.01e-05	0.000256405
ENC1	ENSG00000171617.14	1228.12	0.729495	0.165394	4.41064	1.03e-05	0.000261333
CEP70	ENSG00000114107.9	43.4578	-1.55409	0.352486	-4.40895	1.04e-05	0.000262975
PTGDS	ENSG00000107317.13	28.1149	-2.41037	0.547074	-4.40593	1.05e-05	0.000265408
PDGFRA	ENSG00000134853.12	26.7881	-1.94774	0.44292	-4.39749	1.1e-05	0.000275359
SNX30	ENSG00000148158.17	1271.37	0.42577	0.0968262	4.39727	1.1e-05	0.000275359
ZNF654	ENSG00000175105.7	136.408	-0.8513	0.193646	-4.39615	1.1e-05	0.000276342
CALHM1	ENSG00000185933.6	10.2819	-4.38182	0.996958	-4.39519	1.11e-05	0.000277143
PIGR	ENSG00000162896.6	6.82804	-6.32237	1.43906	-4.39339	1.12e-05	0.000278846
LIMA1	ENSG00000050405.13	286.733	-0.911146	0.207402	-4.39313	1.12e-05	0.000278846
MFSD12	ENSG00000161091.13	2214.51	-1.47399	0.335546	-4.39282	1.12e-05	0.000278846
SPTLC3	ENSG00000172296.13	94.1874	-1.3086	0.297916	-4.39251	1.12e-05	0.000278846
ACTR3	ENSG00000115091.12	4686.64	-0.387243	0.0882388	-4.38858	1.14e-05	0.000283491
CTSD	ENSG00000117984.14	144243	0.459847	0.104833	4.38646	1.15e-05	0.000285828
CCDC69	ENSG00000198624.13	493.304	0.527443	0.120295	4.38459	1.16e-05	0.000287839
PDPR	ENSG00000090857.13	921.155	0.552669	0.126079	4.3835	1.17e-05	0.000288843
EML4	ENSG00000143924.19	1114.21	-0.444932	0.101574	-4.38037	1.18e-05	0.000292126
ELOVL5	ENSG00000012660.14	829.454	-0.593237	0.135477	-4.37888	1.19e-05	0.000293681
ASPM	ENSG00000066279.18	166.657	-1.65322	0.37772	-4.37684	1.2e-05	0.000295163
OTOA	ENSG00000155719.17	408.915	0.714464	0.16324	4.37678	1.2e-05	0.000295163
GK	ENSG00000198814.12	297.454	-0.97256	0.222251	-4.37595	1.21e-05	0.000295669
STUM	ENSG00000203685.10	20.1251	-3.45691	0.790016	-4.37574	1.21e-05	0.000295669
IL4I1	ENSG00000104951.16	381.643	-1.03386	0.236331	-4.37462	1.22e-05	0.00029675
KIF18B	ENSG00000186185.14	29.1778	-1.72969	0.395501	-4.3734	1.22e-05	0.000297957
TPRG1L	ENSG00000158109.15	293.572	0.602524	0.137907	4.36907	1.25e-05	0.000303461
CSTB	ENSG00000160213.7	5834.01	-0.481963	0.110417	-4.36492	1.27e-05	0.000308389
COBL	ENSG00000106078.19	8.80039	-5.2067	1.19286	-4.36489	1.27e-05	0.000308389
DDX43	ENSG00000080007.8	9.74547	5.72753	1.31233	4.36439	1.27e-05	0.000308636
PADI2	ENSG00000117115.13	165.779	0.998059	0.228884	4.36055	1.3e-05	0.000313627
EPB41L2	ENSG00000079819.19	750.675	-0.741062	0.170073	-4.35732	1.32e-05	0.000317813
AKNA	ENSG00000106948.16	1030	0.541934	0.124399	4.35641	1.32e-05	0.000318657
EPAS1	ENSG00000116016.14	2795.41	0.602241	0.138369	4.35241	1.35e-05	0.000324038
RGPD6	ENSG00000183054.11	173.132	2.61623	0.601617	4.34866	1.37e-05	0.000329146
METTL7B	ENSG00000170439.7	44.7277	-1.88537	0.433657	-4.3476	1.38e-05	0.00033008
SLC2A1	ENSG00000117394.23	191.028	-0.927625	0.213376	-4.34738	1.38e-05	0.00033008
SIPA1L2	ENSG00000116991.10	632.824	0.590654	0.135956	4.34444	1.4e-05	0.000334039
PALM2AKAP2	ENSG00000157654.19	879.616	-0.511347	0.117732	-4.34332	1.4e-05	0.000335239
CTC1	ENSG00000178971.16	485.835	0.615354	0.141755	4.34096	1.42e-05	0.000338367
DHX15	ENSG00000109606.13	1315.13	-0.337692	0.0778893	-4.33554	1.45e-05	0.000346298
LGALSL	ENSG00000119862.13	32.5113	-1.65884	0.382695	-4.33462	1.46e-05	0.000347225
TRAM1	ENSG00000067167.8	1008.25	-0.465014	0.107305	-4.33358	1.47e-05	0.000348361
ADK	ENSG00000156110.14	212.537	-0.609814	0.140742	-4.33283	1.47e-05	0.000349029
PLA2G4A	ENSG00000116711.10	304.755	-0.823083	0.19037	-4.32361	1.53e-05	0.000363424
RAB13	ENSG00000143545.10	254.733	-0.680502	0.157509	-4.3204	1.56e-05	0.000368206
KIF15	ENSG00000163808.17	68.9746	-1.72847	0.400185	-4.31917	1.57e-05	0.000369712
SLC9A9	ENSG00000181804.15	1213.54	0.61916	0.143403	4.31762	1.58e-05	0.000371771
LRRC59	ENSG00000108829.10	1050.18	-0.428164	0.0992142	-4.31555	1.59e-05	0.000374733
WDR6	ENSG00000178252.18	1040.08	0.565528	0.131064	4.3149	1.6e-05	0.000375277
ZBTB4	ENSG00000174282.12	986.713	0.448646	0.104052	4.31177	1.62e-05	0.000380085
LIPG	ENSG00000101670.12	10.9331	-4.9848	1.15697	-4.30851	1.64e-05	0.000385168
HSP90AA1	ENSG00000080824.18	5402.83	-0.342695	0.0796056	-4.30491	1.67e-05	0.000390913
ADRA2B	ENSG00000274286.2	156.917	-4.77824	1.11044	-4.30301	1.68e-05	0.000393707
CAST	ENSG00000153113.23	2097.51	-0.319858	0.0744502	-4.29627	1.74e-05	0.000404745
PACC1	ENSG00000065600.12	540.98	0.429872	0.100058	4.29624	1.74e-05	0.000404745
CCDC47	ENSG00000108588.14	915.962	-0.405168	0.0943153	-4.29589	1.74e-05	0.000404791
CDCA8	ENSG00000134690.11	47.7014	-1.28774	0.299837	-4.29479	1.75e-05	0.000406223
MKI67	ENSG00000148773.14	548.367	-1.79314	0.417764	-4.29223	1.77e-05	0.000410336
ZNF710	ENSG00000140548.10	843.996	0.580988	0.135411	4.29055	1.78e-05	0.000412855
NIBAN2	ENSG00000136830.12	1317.88	-0.727766	0.170059	-4.2795	1.87e-05	0.000432926
ZFP36L2	ENSG00000152518.8	498.191	0.560668	0.131017	4.27936	1.87e-05	0.000432926
SLC30A3	ENSG00000115194.11	13.0897	-4.81457	1.12588	-4.27628	1.9e-05	0.000437862
CCL7	ENSG00000108688.11	35.0608	-2.30321	0.538861	-4.27423	1.92e-05	0.000441114
ARHGAP9	ENSG00000123329.19	721.792	0.428657	0.100299	4.27379	1.92e-05	0.000441349
SCYL2	ENSG00000136021.19	692.462	-0.493523	0.115624	-4.26833	1.97e-05	0.000451619
ELMSAN1	ENSG00000156030.13	555.68	0.587279	0.137609	4.26774	1.97e-05	0.000451619
IFITM2	ENSG00000185201.16	118.789	-1.19733	0.280556	-4.26771	1.97e-05	0.000451619
EBP	ENSG00000147155.11	257.266	-0.863266	0.202319	-4.26685	1.98e-05	0.000452711
AC005747.1	ENSG00000007237.18	3968.63	0.397959	0.0933306	4.26398	2.01e-05	0.000457929
HIGD1A	ENSG00000181061.13	388.823	-0.621792	0.145943	-4.26052	2.04e-05	0.000464414
DNM1L	ENSG00000087470.18	713.49	-0.472339	0.110875	-4.26009	2.04e-05	0.000464646
MYO6	ENSG00000196586.16	39.494	-1.5954	0.374643	-4.25846	2.06e-05	0.000467395
JMY	ENSG00000152409.9	134.662	0.760039	0.178496	4.25801	2.06e-05	0.000467673
SPINT1	ENSG00000166145.14	138.931	-1.1673	0.274458	-4.2531	2.11e-05	0.00047736
IFNLR1	ENSG00000185436.12	65.0168	-1.97399	0.464243	-4.25207	2.12e-05	0.000478649
RPSA	ENSG00000168028.14	4192.2	0.328901	0.0773544	4.25187	2.12e-05	0.000478649
GGCT	ENSG00000006625.18	313.665	-0.575252	0.135331	-4.25072	2.13e-05	0.000480437
CITED2	ENSG00000164442.10	296.534	-0.656232	0.154493	-4.24764	2.16e-05	0.000486408
INTS1	ENSG00000164880.16	488.817	-0.475772	0.11204	-4.24646	2.17e-05	0.000487459
NRIP3	ENSG00000175352.11	489.768	-1.1721	0.27602	-4.24643	2.17e-05	0.000487459
CENPN	ENSG00000166451.13	65.9499	-1.49898	0.353031	-4.24603	2.18e-05	0.000487459
ADORA2B	ENSG00000170425.3	234.331	0.739992	0.174284	4.2459	2.18e-05	0.000487459
DNASE1	ENSG00000213918.10	206.97	0.660908	0.155733	4.24385	2.2e-05	0.000491255
RHOF	ENSG00000139725.8	341.81	-1.09771	0.258745	-4.24243	2.21e-05	0.000493413
EXOC5	ENSG00000070367.16	792.376	-0.445616	0.105046	-4.24211	2.21e-05	0.000493413
CXCL9	ENSG00000138755.6	627.253	-6.28808	1.48236	-4.24194	2.22e-05	0.000493413
RASAL2	ENSG00000075391.16	486.159	-0.715188	0.168681	-4.23988	2.24e-05	0.000497264
PDP2	ENSG00000172840.7	48.2297	-1.1743	0.277008	-4.23923	2.24e-05	0.000498029
C19orf38	ENSG00000214212.9	230.863	-0.92816	0.219011	-4.23796	2.26e-05	0.000500163
NPR1	ENSG00000169418.10	6.23944	-5.43069	1.28181	-4.23673	2.27e-05	0.000502199
RREB1	ENSG00000124782.20	923.398	0.424252	0.100169	4.23535	2.28e-05	0.000504604
MTHFD2	ENSG00000065911.12	719.415	-0.491074	0.11607	-4.23084	2.33e-05	0.000514123
WFS1	ENSG00000109501.14	72.912	-1.03467	0.244652	-4.22916	2.35e-05	0.000517081
DDX21	ENSG00000165732.13	713.327	-0.421656	0.0997073	-4.22893	2.35e-05	0.000517081
PTPN6	ENSG00000111679.17	1723.69	-0.341759	0.0808314	-4.22805	2.36e-05	0.000518409
EXOC6	ENSG00000138190.17	244.619	-0.568512	0.134507	-4.22663	2.37e-05	0.000520973
SLC8B1	ENSG00000089060.11	1144.45	0.418997	0.0991435	4.22616	2.38e-05	0.000521026
TMEM236	ENSG00000148483.9	114.517	-1.89801	0.449161	-4.22569	2.38e-05	0.000521026
ANXA2	ENSG00000182718.16	18932.9	-0.428906	0.101535	-4.22423	2.4e-05	0.000523683
EPB41L1	ENSG00000088367.23	163.95	-1.73178	0.410436	-4.21938	2.45e-05	0.000534354
EPOP	ENSG00000273604.2	29.5615	-1.56384	0.370937	-4.21593	2.49e-05	0.00054187
MMD	ENSG00000108960.9	631.332	0.738458	0.175315	4.21218	2.53e-05	0.000550199
ANXA11	ENSG00000122359.18	2753.34	-0.556356	0.132207	-4.20821	2.57e-05	0.000559181
BEST1	ENSG00000167995.16	387.019	0.656882	0.156108	4.20786	2.58e-05	0.000559299
EFR3A	ENSG00000132294.15	1577.31	-0.359941	0.0856127	-4.2043	2.62e-05	0.000567409
OVOL1	ENSG00000172818.10	11.8299	-5.00351	1.19043	-4.2031	2.63e-05	0.000569658
TULP4	ENSG00000130338.13	687.146	0.411869	0.0980051	4.20253	2.64e-05	0.00057033
PRDX6	ENSG00000117592.9	792.991	-0.640193	0.152375	-4.20143	2.65e-05	0.000572348
TP53I13	ENSG00000167543.16	240.164	0.59958	0.142793	4.19894	2.68e-05	0.000577897
PYGL	ENSG00000100504.17	2412.92	0.388092	0.0924551	4.19762	2.7e-05	0.000580488
RBP1	ENSG00000114115.10	79.4965	1.0309	0.245833	4.19349	2.75e-05	0.000589596
FAIM	ENSG00000158234.12	53.6746	-1.66147	0.396499	-4.19035	2.79e-05	0.000596207
CSF3R	ENSG00000119535.17	1136.96	0.521537	0.124517	4.18849	2.81e-05	0.000599588
QPCT	ENSG00000115828.17	166.61	-0.915399	0.218552	-4.18847	2.81e-05	0.000599588
SNX3	ENSG00000112335.15	972.53	-0.419278	0.100142	-4.18681	2.83e-05	0.00060317
JUP	ENSG00000173801.17	33.7715	-1.86484	0.445698	-4.1841	2.86e-05	0.000609611
AP003071.5	ENSG00000287725.1	4.73566	-5.78759	1.38357	-4.1831	2.88e-05	0.000611499
LIN7A	ENSG00000111052.7	47.4746	1.23699	0.295896	4.1805	2.91e-05	0.000616244
RHOBTB2	ENSG00000008853.16	321.075	-1.01761	0.243422	-4.18044	2.91e-05	0.000616244
NCK1	ENSG00000158092.7	642.33	-0.450322	0.107797	-4.17751	2.95e-05	0.000623418
C12orf57	ENSG00000111678.11	127.324	0.755843	0.181052	4.17473	2.98e-05	0.000630246
TRPV2	ENSG00000187688.15	2111.54	-0.573743	0.137471	-4.17356	3e-05	0.000632659
MOB1A	ENSG00000114978.18	2524.02	-0.402338	0.096472	-4.17051	3.04e-05	0.000640344
APPL2	ENSG00000136044.12	663.943	0.477099	0.114432	4.16929	3.06e-05	0.000642269
MAP4K3	ENSG00000011566.15	217.612	-0.604309	0.144945	-4.16923	3.06e-05	0.000642269
CRYL1	ENSG00000165475.15	840.732	0.578505	0.138768	4.16886	3.06e-05	0.000642453
IRF5	ENSG00000128604.20	1601.26	0.402534	0.0965825	4.16777	3.08e-05	0.000644697
CPED1	ENSG00000106034.18	168.186	-1.07874	0.258918	-4.16634	3.1e-05	0.000647923
FAS	ENSG00000026103.22	69.3881	-1.46683	0.352162	-4.16521	3.11e-05	0.000650273
RNF144B	ENSG00000137393.9	525.247	-0.886967	0.212984	-4.16448	3.12e-05	0.000651529
TMEM86A	ENSG00000151117.9	1281.34	0.536969	0.128958	4.16392	3.13e-05	0.000652282
DNAJC10	ENSG00000077232.18	1096.12	-0.410112	0.0985109	-4.16311	3.14e-05	0.000652902
RAP2A	ENSG00000125249.7	955.965	-0.366099	0.0879453	-4.1628	3.14e-05	0.000652935
ZMPSTE24	ENSG00000084073.9	480.131	-0.470794	0.113223	-4.15813	3.21e-05	0.000665582
PTPA	ENSG00000119383.19	1088.53	-0.549354	0.132165	-4.15658	3.23e-05	0.000669249
TPM2	ENSG00000198467.15	56.5489	-1.69218	0.40717	-4.15595	3.24e-05	0.000670238
AGPAT4	ENSG00000026652.15	861.682	0.727722	0.175123	4.15549	3.25e-05	0.000670723
THBD	ENSG00000178726.7	234.358	1.14167	0.274782	4.15482	3.26e-05	0.000671827
PTPN1	ENSG00000196396.10	728.478	-0.431792	0.104007	-4.15156	3.3e-05	0.000680035
SUCNR1	ENSG00000198829.6	846.722	-0.516547	0.124426	-4.15145	3.3e-05	0.000680035
KEL	ENSG00000197993.9	11.9269	-2.89507	0.697721	-4.14933	3.33e-05	0.0006855
FHL1	ENSG00000022267.19	41.1527	-2.03167	0.490372	-4.14311	3.43e-05	0.000703453
CCL2	ENSG00000108691.9	10109.1	0.588564	0.142205	4.13884	3.49e-05	0.000714837
DDX11	ENSG00000013573.17	212.237	-0.594433	0.143989	-4.12831	3.65e-05	0.000747434
MTURN	ENSG00000180354.16	234.871	0.817331	0.198022	4.12748	3.67e-05	0.000749186
KCNQ1	ENSG00000053918.18	267.595	0.573086	0.138912	4.12552	3.7e-05	0.000754614
ERCC6L	ENSG00000186871.7	20.5808	-2.2115	0.536252	-4.12399	3.72e-05	0.000758703
SYNJ2	ENSG00000078269.15	152.422	-0.970116	0.235299	-4.1229	3.74e-05	0.000761345
KNL1	ENSG00000137812.19	156.961	-1.40681	0.341243	-4.1226	3.75e-05	0.000761353
TWSG1	ENSG00000128791.12	223.346	-0.678173	0.164543	-4.12156	3.76e-05	0.000763838
ENPP2	ENSG00000136960.12	156.106	-4.12444	1.00136	-4.11883	3.81e-05	0.000771328
TBC1D3L	ENSG00000274512.5	53.7704	1.1917	0.289394	4.11791	3.82e-05	0.000773126
TOGARAM2	ENSG00000189350.12	10.9524	-3.4275	0.832625	-4.1165	3.85e-05	0.000776889
DPYD	ENSG00000188641.14	1956.04	-0.39172	0.0952068	-4.11441	3.88e-05	0.000782964
SPTBN5	ENSG00000137877.10	63.7996	-1.19176	0.289736	-4.11327	3.9e-05	0.000785844
CMTM7	ENSG00000153551.14	838.687	0.524326	0.127482	4.11296	3.91e-05	0.000785944
LASP1	ENSG00000002834.18	3550.81	-0.463255	0.112651	-4.1123	3.92e-05	0.000787186
NLRC4	ENSG00000091106.19	452.793	0.711137	0.173012	4.11032	3.95e-05	0.000792973
GLB1L	ENSG00000163521.16	288.076	0.85644	0.208617	4.10533	4.04e-05	0.00080928
DSTN	ENSG00000125868.16	381.403	-0.591041	0.144108	-4.10137	4.11e-05	0.000820667
PLIN2	ENSG00000147872.10	7483.24	1.62672	0.396641	4.10124	4.11e-05	0.000820667
USP2	ENSG00000036672.16	55.5249	-4.55312	1.11032	-4.10071	4.12e-05	0.000821526
CCND2	ENSG00000118971.8	353.126	-0.789853	0.192839	-4.09593	4.2e-05	0.000836586
TMED5	ENSG00000117500.13	884.017	-0.480911	0.117484	-4.09343	4.25e-05	0.000844612
SLAMF8	ENSG00000158714.11	1377.28	-0.771372	0.18849	-4.09237	4.27e-05	0.00084742
JMJD7-PLA2G4B	ENSG00000168970.22	211.69	0.762076	0.18624	4.09189	4.28e-05	0.000848137
MFN1	ENSG00000171109.19	444.849	-0.491851	0.120238	-4.09066	4.3e-05	0.000851191
MYO15B	ENSG00000266714.9	386.395	0.621396	0.151946	4.08959	4.32e-05	0.000853433
ADI1	ENSG00000182551.14	994.016	0.485876	0.11883	4.08883	4.34e-05	0.000855203
CD302	ENSG00000241399.7	495.64	-0.504886	0.123507	-4.08792	4.35e-05	0.000857514
MTPN	ENSG00000105887.11	1503.7	-0.407626	0.0997848	-4.08505	4.41e-05	0.000867109
CASP7	ENSG00000165806.20	266.262	-0.837064	0.204946	-4.08433	4.42e-05	0.000868751
CDKN2C	ENSG00000123080.12	84.9987	-1.15762	0.283481	-4.08358	4.43e-05	0.000870481
CENPE	ENSG00000138778.13	159.763	-1.20884	0.29611	-4.0824	4.46e-05	0.000873857
STMN3	ENSG00000197457.10	103.605	1.04496	0.256326	4.07667	4.57e-05	0.000894562
CDH23	ENSG00000107736.21	131.165	-1.46056	0.358302	-4.07633	4.58e-05	0.000894766
GPSM2	ENSG00000121957.14	100.27	-1.0788	0.264814	-4.07379	4.63e-05	0.0009035
REEP1	ENSG00000068615.18	6.36681	-5.46265	1.34125	-4.0728	4.65e-05	0.000906269
KBTBD8	ENSG00000163376.11	195.785	-0.703972	0.172941	-4.0706	4.69e-05	0.000911452
PNP	ENSG00000198805.11	490.246	-0.767993	0.188672	-4.07051	4.69e-05	0.000911452
ADAMTS14	ENSG00000138316.11	4.40026	-5.68001	1.39546	-4.07034	4.69e-05	0.000911452
NOP53	ENSG00000105373.19	1018.46	0.462685	0.113732	4.06823	4.74e-05	0.000918137
GPR15	ENSG00000154165.5	19.8058	1.96221	0.482344	4.06807	4.74e-05	0.000918137
ARSD	ENSG00000006756.16	637.662	-0.645881	0.158784	-4.06768	4.75e-05	0.000918585
ITPR1	ENSG00000150995.19	2241.8	-0.382402	0.0940276	-4.06691	4.76e-05	0.000920483
FAT1	ENSG00000083857.14	4.36244	-5.67338	1.3951	-4.06664	4.77e-05	0.000920483
ZWINT	ENSG00000122952.17	161.589	-1.00173	0.246367	-4.06603	4.78e-05	0.000921775
CRTAM	ENSG00000109943.9	123.018	-0.898648	0.221077	-4.06486	4.81e-05	0.000925294
WASF3	ENSG00000132970.14	9.33715	4.16593	1.0258	4.06117	4.88e-05	0.000938938
ABCA7	ENSG00000064687.13	501.781	0.500464	0.123271	4.05987	4.91e-05	0.000943065
VSIG10L	ENSG00000186806.5	51.6517	1.27428	0.314034	4.05779	4.95e-05	0.000950356
LRMDA	ENSG00000148655.15	82.9378	-0.949673	0.234124	-4.05628	4.99e-05	0.000955391
DGAT2	ENSG00000062282.15	20.1728	-1.81315	0.447216	-4.05431	5.03e-05	0.000961184
PLK1	ENSG00000166851.15	69.9738	-1.45161	0.358605	-4.04793	5.17e-05	0.000986567
AKR1C1	ENSG00000187134.14	17.689	2.23799	0.553359	4.04437	5.25e-05	0.0010005
APP	ENSG00000142192.21	1433.23	-0.416363	0.103021	-4.04155	5.31e-05	0.00101138
CACNA2D3	ENSG00000157445.15	91.6853	1.43838	0.35598	4.04062	5.33e-05	0.0010142
PLBD2	ENSG00000151176.8	1259.99	0.356714	0.088315	4.03911	5.37e-05	0.00101957
CAMK1G	ENSG00000008118.10	5.90767	-5.34178	1.32281	-4.03822	5.39e-05	0.00102223
CKAP2L	ENSG00000169607.13	51.2162	-1.6347	0.405004	-4.03626	5.43e-05	0.00102959
SLC22A15	ENSG00000163393.13	265.337	0.742869	0.18408	4.03557	5.45e-05	0.00103138
WDHD1	ENSG00000198554.12	113.708	-1.025	0.254212	-4.03207	5.53e-05	0.00104478
HLA-DRB1	ENSG00000196126.11	10594.9	-0.679213	0.168474	-4.03155	5.54e-05	0.00104478
C1QB	ENSG00000173369.16	2015.61	-2.47044	0.612793	-4.03144	5.54e-05	0.00104478
NCAPG	ENSG00000109805.10	112.383	-1.66488	0.413046	-4.03074	5.56e-05	0.00104665
DCUN1D1	ENSG00000043093.15	359.282	-0.533216	0.132368	-4.02829	5.62e-05	0.00105639
TCP1	ENSG00000120438.12	1126.32	-0.356142	0.0884177	-4.02794	5.63e-05	0.00105671
CXCL8	ENSG00000169429.11	1157.92	0.879219	0.218351	4.02662	5.66e-05	0.00106004
YPEL4	ENSG00000166793.12	44.8457	-2.02904	0.503953	-4.02624	5.67e-05	0.00106004
TLR3	ENSG00000164342.12	60.4544	-1.81061	0.449718	-4.02611	5.67e-05	0.00106004
MAP3K20	ENSG00000091436.17	352.273	-0.617577	0.153405	-4.02579	5.68e-05	0.00106023
DECR1	ENSG00000104325.7	497.51	-0.516599	0.128468	-4.02122	5.79e-05	0.00107975
PPP1R14B	ENSG00000173457.11	339.178	-0.627299	0.156069	-4.01936	5.84e-05	0.00108706
CLTC	ENSG00000141367.12	8523.67	-0.282903	0.0704066	-4.01813	5.87e-05	0.00109147
SLC46A1	ENSG00000076351.13	798.657	0.494055	0.123051	4.01505	5.94e-05	0.00110351
NDST1	ENSG00000070614.15	766.599	-0.539379	0.134447	-4.01183	6.02e-05	0.00111611
CKS2	ENSG00000123975.5	105.876	-1.0143	0.252831	-4.01178	6.03e-05	0.00111611
DHCR7	ENSG00000172893.15	184.46	-0.81767	0.203952	-4.00913	6.09e-05	0.00112741
DNAJC15	ENSG00000120675.6	243.638	-0.714304	0.178204	-4.00835	6.11e-05	0.00112978
SLC23A2	ENSG00000089057.15	2203.63	0.304933	0.0760793	4.00809	6.12e-05	0.00112978
PCGF2	ENSG00000277258.5	4.08877	-5.5758	1.39182	-4.00612	6.17e-05	0.00113795
FCGR1A	ENSG00000150337.13	1108.33	-0.732055	0.183044	-3.99933	6.35e-05	0.00116973
GLO1	ENSG00000124767.7	460.805	-0.455388	0.113981	-3.99531	6.46e-05	0.0011871
MAPKAPK3	ENSG00000114738.11	1680	-0.352732	0.0882867	-3.9953	6.46e-05	0.0011871
BASP1	ENSG00000176788.9	794.205	0.52873	0.132412	3.99308	6.52e-05	0.00119689
PSMC6	ENSG00000100519.12	563.335	-0.436396	0.109319	-3.99196	6.55e-05	0.00120122
KIF18A	ENSG00000121621.7	29.0215	-2.01786	0.505858	-3.98899	6.64e-05	0.00121494
TNFAIP8L1	ENSG00000185361.9	183.679	-0.8158	0.204633	-3.98666	6.7e-05	0.00122555
SLC25A37	ENSG00000147454.14	165.106	0.63397	0.159035	3.98635	6.71e-05	0.00122574
TBCC	ENSG00000124659.7	238.434	0.610059	0.153053	3.98595	6.72e-05	0.00122583
CBX7	ENSG00000100307.13	221.436	0.943944	0.23684	3.98557	6.73e-05	0.00122583
USP15	ENSG00000135655.16	951.69	-0.445949	0.111906	-3.98505	6.75e-05	0.00122583
KDM5D	ENSG00000012817.15	542.732	12.5069	3.1385	3.98499	6.75e-05	0.00122583
RPS4Y1	ENSG00000129824.16	527.37	12.4655	3.13358	3.97802	6.95e-05	0.00126089
EIF4G1	ENSG00000114867.20	3067.38	-0.288194	0.0724616	-3.97719	6.97e-05	0.00126385
EHD1	ENSG00000110047.18	413.679	0.523433	0.131682	3.97497	7.04e-05	0.00127429
CDK1	ENSG00000170312.16	151.505	-1.30011	0.327392	-3.97111	7.15e-05	0.00129219
NLRP2	ENSG00000022556.16	300.065	-0.590289	0.14884	-3.96594	7.31e-05	0.00131906
ING5	ENSG00000168395.15	252.807	0.552854	0.139412	3.96562	7.32e-05	0.00131936
PTPRE	ENSG00000132334.16	1719.93	-0.452836	0.114214	-3.9648	7.35e-05	0.0013224
UGP2	ENSG00000169764.15	850.554	-0.43969	0.110922	-3.96397	7.37e-05	0.00132555
RPL31	ENSG00000071082.11	2339.24	0.393931	0.0994007	3.96306	7.4e-05	0.0013291
SEL1L2	ENSG00000101251.12	4.58404	-5.74861	1.4508	-3.96238	7.42e-05	0.00133139
GSTM4	ENSG00000168765.17	297.308	-0.531866	0.134289	-3.96062	7.48e-05	0.00133976
SLC38A6	ENSG00000139974.15	936.418	-0.327025	0.0826005	-3.95912	7.52e-05	0.00134673
PRC1	ENSG00000198901.14	227.328	-1.2161	0.307206	-3.95858	7.54e-05	0.00134823
DLST	ENSG00000119689.15	686.98	-0.46889	0.118467	-3.95798	7.56e-05	0.00135016
RPS10	ENSG00000124614.16	2942.61	0.308656	0.078044	3.95489	7.66e-05	0.00136542
EIF3F	ENSG00000175390.14	1072.48	0.360073	0.0910514	3.95461	7.67e-05	0.00136542
GPER1	ENSG00000164850.15	7.78026	-4.40716	1.11447	-3.95449	7.67e-05	0.00136542
APOO	ENSG00000184831.14	84.5671	-0.831629	0.210444	-3.95179	7.76e-05	0.00137941
RBM5	ENSG00000003756.17	1409.04	0.339697	0.0859717	3.95126	7.77e-05	0.00138094
MOSPD1	ENSG00000101928.13	131.947	-0.922779	0.233566	-3.95082	7.79e-05	0.00138127
SP3	ENSG00000172845.15	1545.27	0.332125	0.0840731	3.95043	7.8e-05	0.00138127
HLA-C	ENSG00000204525.16	10536.3	-0.567489	0.143653	-3.95041	7.8e-05	0.00138127
GALNT10	ENSG00000164574.16	642.322	0.445697	0.112866	3.94892	7.85e-05	0.00138837
KCTD7	ENSG00000243335.9	1023.63	0.43594	0.110435	3.94749	7.9e-05	0.00139516
DOCK2	ENSG00000134516.17	7017.2	0.32957	0.0835002	3.94694	7.92e-05	0.00139682
ADGRE5	ENSG00000123146.20	529.772	-0.831402	0.210681	-3.94626	7.94e-05	0.00139924
SPAG5	ENSG00000076382.17	214.913	-1.11495	0.282601	-3.94531	7.97e-05	0.00140327
PHTF1	ENSG00000116793.16	218.423	-0.631134	0.16001	-3.94433	8e-05	0.0014075
KLHL3	ENSG00000146021.15	36.446	1.41209	0.358141	3.94283	8.05e-05	0.00141479
HMGCS1	ENSG00000112972.15	500.726	-0.619937	0.157267	-3.94194	8.08e-05	0.0014185
ADAM23	ENSG00000114948.13	20.2245	2.31532	0.587536	3.94073	8.12e-05	0.0014241
FCER2	ENSG00000104921.15	83.1867	1.65406	0.419905	3.93913	8.18e-05	0.00143209
ACCS	ENSG00000110455.14	521.275	0.4243	0.107754	3.93767	8.23e-05	0.00143844
MANF	ENSG00000145050.18	230.469	-0.691525	0.175623	-3.93755	8.23e-05	0.00143844
RGCC	ENSG00000102760.13	526.77	-1.86348	0.4733	-3.93721	8.24e-05	0.00143887
DNAJB11	ENSG00000090520.11	723.949	-0.401165	0.101927	-3.93581	8.29e-05	0.00144575
SH3KBP1	ENSG00000147010.18	693.946	0.380627	0.0967208	3.93532	8.31e-05	0.00144591
CNPY2	ENSG00000257727.6	299.006	-0.567506	0.144211	-3.93526	8.31e-05	0.00144591
SLC16A1	ENSG00000155380.11	420.731	-0.682502	0.17349	-3.93396	8.36e-05	0.00145219
PSME2	ENSG00000100911.16	976.187	-1.77067	0.450249	-3.93264	8.4e-05	0.00145861
GOLGA8A	ENSG00000175265.17	310.398	0.637756	0.162418	3.92664	8.61e-05	0.00149384
ERN1	ENSG00000178607.16	387.104	0.688382	0.175644	3.91918	8.88e-05	0.00153916
TNFAIP8L2	ENSG00000163154.6	459.093	0.499572	0.127553	3.9166	8.98e-05	0.00155406
CEP55	ENSG00000138180.16	134.499	-1.71058	0.436899	-3.91529	9.03e-05	0.00156087
FLNA	ENSG00000196924.18	16842.3	-0.443358	0.113248	-3.91495	9.04e-05	0.0015614
TCF7	ENSG00000081059.20	405.008	0.704828	0.180156	3.91232	9.14e-05	0.00157682
CALR	ENSG00000179218.13	10080.2	-0.44515	0.113805	-3.91152	9.17e-05	0.00158033
CCT8	ENSG00000156261.13	1045.51	-0.404496	0.103424	-3.91106	9.19e-05	0.00158163
DSP	ENSG00000096696.14	47.1946	-1.94646	0.497733	-3.91065	9.2e-05	0.00158261
HSPA8	ENSG00000109971.14	17025.5	-0.295088	0.0754763	-3.90968	9.24e-05	0.00158732
IL36RN	ENSG00000136695.15	3.99556	-5.54623	1.41891	-3.90879	9.28e-05	0.00159144
FADS2	ENSG00000134824.14	841.379	-1.62367	0.415506	-3.90769	9.32e-05	0.00159703
DDX3Y	ENSG00000067048.17	400.957	12.0701	3.09071	3.90529	9.41e-05	0.00161125
LGR4	ENSG00000205213.14	188.026	0.948433	0.242905	3.90454	9.44e-05	0.0016145
CMAS	ENSG00000111726.13	161.89	-0.746693	0.191257	-3.90414	9.46e-05	0.00161546
ANLN	ENSG00000011426.11	238.576	-1.33448	0.341864	-3.90353	9.48e-05	0.00161782
RRP12	ENSG00000052749.14	226.84	-0.599263	0.153557	-3.90255	9.52e-05	0.00162095
CALM1	ENSG00000198668.12	3347.08	-0.336597	0.0862822	-3.90112	9.57e-05	0.00162882
IARS2	ENSG00000067704.10	1336.95	-0.314291	0.0806022	-3.89929	9.65e-05	0.00163946
HMMR	ENSG00000072571.20	70.5017	-1.59977	0.410338	-3.89867	9.67e-05	0.00164196
XPNPEP1	ENSG00000108039.18	717.771	-0.354005	0.0908122	-3.89821	9.69e-05	0.00164331
MAP4	ENSG00000047849.21	854.079	-0.346866	0.0890741	-3.89412	9.86e-05	0.00166775
SLC7A8	ENSG00000092068.20	640.353	1.02127	0.262284	3.89377	9.87e-05	0.00166843
SLC11A2	ENSG00000110911.16	1584.01	-0.415479	0.106728	-3.89288	9.91e-05	0.00167283
C1D	ENSG00000197223.11	92.6588	-0.800185	0.205592	-3.8921	9.94e-05	0.00167645
DUSP14	ENSG00000276023.5	66.1261	-1.19686	0.307618	-3.89075	9.99e-05	0.00168225
MSC	ENSG00000178860.8	56.756	-1.31767	0.338836	-3.88883	0.00010073	0.00169387
MAGED2	ENSG00000102316.17	884.45	0.434494	0.111813	3.88591	0.000101946	0.00171252
CHD7	ENSG00000171316.12	292.887	0.58547	0.150747	3.8838	0.000102835	0.00172565
UFM1	ENSG00000120686.12	496.116	-0.442585	0.114082	-3.87955	0.00010465	0.00175209
RHOBTB1	ENSG00000072422.17	406.039	0.61652	0.158924	3.87935	0.000104737	0.00175209
SORBS3	ENSG00000120896.13	686.493	0.400742	0.103311	3.87899	0.000104889	0.00175281
KLF4	ENSG00000136826.15	131.009	0.809516	0.208773	3.87749	0.000105538	0.00175999
RAP1GDS1	ENSG00000138698.14	531.38	-0.527674	0.136096	-3.87722	0.000105657	0.00176014
RNF145	ENSG00000145860.11	712.817	-0.631904	0.162991	-3.87693	0.000105782	0.00176036
PHACTR1	ENSG00000112137.17	483.503	0.685236	0.176758	3.87669	0.000105889	0.00176036
TOMM7	ENSG00000196683.10	646.527	0.435976	0.112496	3.87548	0.000106413	0.00176543
MAPK8IP3	ENSG00000138834.13	570.54	0.507076	0.130923	3.87308	0.000107467	0.0017774
LYN	ENSG00000254087.8	1776.53	0.310363	0.0801603	3.87178	0.000108042	0.00178508
TNFRSF10A	ENSG00000104689.10	195.752	-0.669846	0.173131	-3.86902	0.000109274	0.00180359
LMNB1	ENSG00000113368.12	195.075	-0.934213	0.241601	-3.86677	0.000110288	0.00181844
TESC	ENSG00000088992.18	67.6585	1.18541	0.306617	3.86609	0.000110594	0.00182163
ADAMTS10	ENSG00000142303.14	44.6484	1.30387	0.337294	3.86567	0.000110785	0.00182291
RPL18	ENSG00000063177.13	2049.58	0.302227	0.0782167	3.86397	0.000111558	0.00183376
KPNB1	ENSG00000108424.10	2396.92	-0.25212	0.0652645	-3.86304	0.000111983	0.00183885
MELK	ENSG00000165304.8	91.8615	-1.09792	0.284246	-3.86257	0.000112199	0.00184052
CALHM6	ENSG00000188820.13	90.101	-3.74189	0.968901	-3.86199	0.000112465	0.00184301
POLQ	ENSG00000051341.14	97.5523	-1.05098	0.272214	-3.86087	0.000112984	0.00184963
TNFSF10	ENSG00000121858.11	125.849	-1.33671	0.346292	-3.86006	0.000113358	0.00185385
CIP2A	ENSG00000163507.14	69.6807	-0.927692	0.240485	-3.85759	0.000114512	0.00186893
GLUL	ENSG00000135821.18	25031.7	-0.601255	0.155905	-3.85655	0.000115001	0.001875
SLC1A5	ENSG00000105281.12	424.529	-0.809038	0.209875	-3.85486	0.000115796	0.00188606
ZNF697	ENSG00000143067.5	115.507	-0.771071	0.200042	-3.85454	0.000115946	0.00188641
GTF2IRD2	ENSG00000196275.14	63.4616	1.13932	0.295595	3.85432	0.000116053	0.00188641
TMX3	ENSG00000166479.10	375.375	-0.54433	0.141247	-3.85375	0.000116324	0.00188892
BCR	ENSG00000186716.21	314.609	0.572361	0.148662	3.85009	0.000118073	0.00191342
CDK7	ENSG00000134058.12	122.015	-0.786024	0.204163	-3.84998	0.000118126	0.00191342
PARP12	ENSG00000059378.13	1078.32	-0.687878	0.178687	-3.84963	0.000118298	0.00191342
INHBA	ENSG00000122641.11	9.99926	-3.03003	0.787101	-3.8496	0.000118309	0.00191342
LEMD2	ENSG00000161904.12	497.518	0.542778	0.141037	3.84848	0.000118852	0.00192026
FGD3	ENSG00000127084.19	804.66	0.545231	0.141724	3.84714	0.000119507	0.00192891
TRERF1	ENSG00000124496.12	295.262	0.47685	0.124019	3.84499	0.000120558	0.00194392
FASTKD1	ENSG00000138399.18	240.155	-0.597346	0.155394	-3.84408	0.000121006	0.00194919
G0S2	ENSG00000123689.6	21.1215	-1.75857	0.457743	-3.84182	0.000122124	0.00196523
USP9Y	ENSG00000114374.13	314.886	11.7215	3.05474	3.83715	0.000124468	0.00199743
DHFR	ENSG00000228716.7	194.179	-0.799407	0.208336	-3.8371	0.000124497	0.00199743
LBH	ENSG00000213626.13	410.592	0.543736	0.141791	3.83476	0.000125685	0.00201446
IGSF6	ENSG00000140749.9	6080.52	-0.446183	0.116374	-3.83404	0.000126053	0.00201836
SMC4	ENSG00000113810.16	313.813	-0.604654	0.157774	-3.83241	0.000126893	0.00202978
PDIA4	ENSG00000155660.11	2051.69	-0.366467	0.0956543	-3.83116	0.000127541	0.00203813
NCAPG2	ENSG00000146918.20	144.539	-0.683619	0.178464	-3.83057	0.000127849	0.00204102
ANG	ENSG00000214274.9	24.6154	1.53242	0.400363	3.82758	0.000129409	0.00206201
MMP19	ENSG00000123342.16	466.663	-0.937403	0.244909	-3.82756	0.000129421	0.00206201
HOMER3	ENSG00000051128.19	693.497	0.480272	0.12554	3.82565	0.000130426	0.00207515
FSTL4	ENSG00000053108.17	9.70582	3.43514	0.897956	3.82551	0.000130503	0.00207515
SYNCRIP	ENSG00000135316.18	697.896	-0.39019	0.102004	-3.82526	0.000130634	0.00207517
FEN1	ENSG00000168496.4	226.388	-0.755466	0.197513	-3.8249	0.000130825	0.00207615
RPL27A	ENSG00000166441.13	3661.59	0.285188	0.0746341	3.82114	0.000132834	0.00210596
TTK	ENSG00000112742.10	40.2062	-2.06581	0.540895	-3.81925	0.000133857	0.00212008
GIMAP1-GIMAP5	ENSG00000281887.3	172.56	1.14016	0.298558	3.81887	0.000134065	0.00212128
NCS1	ENSG00000107130.10	263.026	-1.18072	0.309264	-3.81784	0.000134625	0.00212805
CLSPN	ENSG00000092853.14	110.271	-1.09963	0.288077	-3.81715	0.000135001	0.0021319
ATP5MD	ENSG00000173915.16	228.812	-0.713797	0.187089	-3.81527	0.000136032	0.00214608
ARHGAP5	ENSG00000100852.13	463.997	-0.500172	0.131145	-3.8139	0.000136794	0.00215597
NEFH	ENSG00000100285.10	50.7851	-1.37231	0.359872	-3.81333	0.000137105	0.00215876
MS4A1	ENSG00000156738.17	171.327	0.951299	0.249567	3.81179	0.000137963	0.00217015
L3MBTL1	ENSG00000185513.16	84.9589	0.913077	0.239566	3.81139	0.000138189	0.002171
ISOC2	ENSG00000063241.8	180.968	-0.644992	0.169235	-3.81121	0.000138287	0.002171
PPFIBP2	ENSG00000166387.13	920.196	0.506104	0.13282	3.81046	0.000138709	0.00217388
QPRT	ENSG00000103485.19	594.716	0.693252	0.181946	3.8102	0.000138852	0.00217388
COL22A1	ENSG00000169436.17	15.0667	-2.5752	0.67588	-3.81015	0.000138883	0.00217388
DGKA	ENSG00000065357.20	529.171	0.60118	0.157793	3.80992	0.000139011	0.00217388
TMEM167A	ENSG00000174695.10	558.282	-0.426782	0.11204	-3.8092	0.000139416	0.00217621
KLF11	ENSG00000172059.11	355.239	0.492665	0.129337	3.80915	0.000139446	0.00217621
TALDO1	ENSG00000177156.11	2923.76	0.282637	0.0742036	3.80894	0.000139566	0.00217621
PCDH9	ENSG00000184226.15	43.8172	1.61197	0.42331	3.80803	0.00014008	0.00218049
ECT2	ENSG00000114346.13	173.936	-0.648624	0.170333	-3.80797	0.000140112	0.00218049
ZNF696	ENSG00000185730.8	72.5292	0.901882	0.236907	3.80691	0.000140714	0.00218774
DYRK3	ENSG00000143479.17	69.6599	-0.91283	0.239807	-3.80653	0.000140932	0.0021881
CACNA1I	ENSG00000100346.18	71.0946	1.32489	0.34807	3.80639	0.000141009	0.0021881
RNF166	ENSG00000158717.11	644.36	0.521688	0.137075	3.80586	0.000141314	0.0021907
KIFC1	ENSG00000237649.8	99.1978	-1.18701	0.311957	-3.80505	0.000141773	0.00219571
MTFP1	ENSG00000242114.6	125.89	-0.82947	0.218036	-3.80427	0.000142221	0.00220048
ZNF589	ENSG00000164048.14	808.799	0.403516	0.106076	3.80404	0.000142355	0.00220048
SPPL2B	ENSG00000005206.17	174.375	0.643166	0.169132	3.80274	0.000143104	0.00220781
RECQL4	ENSG00000160957.13	52.9579	-1.29068	0.33946	-3.80215	0.000143445	0.00221095
OBSCN	ENSG00000154358.21	259.864	0.686629	0.180716	3.79949	0.000144995	0.0022327
COL4A1	ENSG00000187498.16	4.94912	-5.08825	1.33958	-3.79841	0.000145629	0.00224031
P2RX1	ENSG00000108405.4	110.103	-1.14277	0.301069	-3.7957	0.000147229	0.0022581
CTSA	ENSG00000064601.18	8481.26	0.389424	0.102601	3.79553	0.000147327	0.0022581
AMZ2	ENSG00000196704.12	338.262	-0.513374	0.135259	-3.7955	0.000147347	0.0022581
SPTBN1	ENSG00000115306.16	1418.94	0.510685	0.134594	3.79427	0.000148079	0.00226716
SREBF1	ENSG00000072310.17	286.234	-0.712653	0.188049	-3.78972	0.000150819	0.00230543
DCHS1	ENSG00000166341.8	34.7247	1.52609	0.402711	3.78954	0.000150927	0.00230543
B3GALNT2	ENSG00000162885.13	367.498	-0.548811	0.144828	-3.7894	0.000151009	0.00230543
SGPP2	ENSG00000163082.10	52.4135	1.18059	0.311717	3.78738	0.000152243	0.00232206
GIPC3	ENSG00000179855.8	15.3627	-2.50917	0.662859	-3.78537	0.00015348	0.00233871
ARG2	ENSG00000081181.8	29.5482	-1.57649	0.416604	-3.78415	0.000154237	0.00234802
KLF10	ENSG00000155090.15	529.303	0.431723	0.114109	3.78343	0.000154685	0.00235262
YWHAQ	ENSG00000134308.14	847.318	-0.512497	0.135518	-3.78177	0.000155717	0.00236608
HAT1	ENSG00000128708.13	240.39	-0.657303	0.173841	-3.78106	0.000156165	0.0023685
ACE	ENSG00000159640.16	522.915	-1.56595	0.414176	-3.78087	0.00015628	0.0023685
ZNF746	ENSG00000181220.17	394.212	0.432513	0.114397	3.78081	0.000156319	0.0023685
ACSS3	ENSG00000111058.8	11.5256	3.17567	0.84005	3.78034	0.000156617	0.00237079
SFT2D2	ENSG00000213064.10	1551.18	-0.413488	0.109388	-3.78002	0.000156816	0.00237156
NBEAL2	ENSG00000160796.18	636.482	-0.491002	0.129963	-3.77802	0.000158081	0.00238845
RPL30	ENSG00000156482.11	2617.57	0.313245	0.0829521	3.77622	0.000159226	0.00240348
ERP44	ENSG00000023318.8	626.24	-0.401939	0.106471	-3.77511	0.000159938	0.00241198
KIF4A	ENSG00000090889.12	69.7148	-1.59007	0.421261	-3.77454	0.000160304	0.00241523
CD101	ENSG00000134256.12	97.3275	1.14898	0.304667	3.77125	0.000162432	0.00244271
NPC1	ENSG00000141458.13	3439.52	-0.556128	0.147519	-3.76988	0.000163325	0.00245385
SH3BGRL	ENSG00000131171.13	1222.91	-0.368771	0.0978285	-3.76956	0.000163534	0.00245469
SH3GLB1	ENSG00000097033.14	1051.6	-0.426446	0.113153	-3.76876	0.000164064	0.00246034
GLS	ENSG00000115419.13	1005.25	-0.407858	0.108242	-3.76803	0.000164544	0.00246524
FH	ENSG00000091483.6	553.788	-0.46384	0.12319	-3.76525	0.000166381	0.00249045
IFNGR1	ENSG00000027697.14	2561.89	-0.344437	0.0915911	-3.76059	0.000169512	0.00253495
TYMP	ENSG00000025708.14	2934.03	-1.37421	0.365553	-3.75926	0.000170417	0.00254456
PAICS	ENSG00000128050.8	263.338	-0.646015	0.171852	-3.75914	0.000170496	0.00254456
GBP4	ENSG00000162654.9	367.835	-2.91197	0.775019	-3.75729	0.000171766	0.00255914
SHLD2	ENSG00000122376.11	511.228	-0.397416	0.1058	-3.7563	0.000172445	0.00256688
BPI	ENSG00000101425.14	4.65413	-4.98901	1.32886	-3.75435	0.000173793	0.00258454
GNAQ	ENSG00000156052.11	678.844	-0.357951	0.0954167	-3.75145	0.000175814	0.00261219
AC004151.1	ENSG00000180448.10	1915.12	0.368682	0.0983154	3.74999	0.000176843	0.00262435
ANAPC7	ENSG00000196510.12	789.862	-0.377391	0.100642	-3.74982	0.000176959	0.00262435
GLRX3	ENSG00000108010.12	331.373	-0.549287	0.146512	-3.74909	0.00017748	0.00262965
GCSH	ENSG00000140905.11	33.2886	-1.49397	0.399032	-3.744	0.000181115	0.00268103
GBP1	ENSG00000117228.10	1070.66	-2.48172	0.663221	-3.74193	0.000182614	0.00270074
LY86	ENSG00000112799.9	1404.59	0.407839	0.109027	3.74071	0.000183501	0.00270659
LRRK2	ENSG00000188906.16	697.935	-0.555817	0.148587	-3.74069	0.000183515	0.00270659
CD164	ENSG00000135535.17	2786.01	-0.446848	0.11949	-3.73964	0.000184284	0.00271545
PECAM1	ENSG00000261371.6	4721.51	0.241583	0.0646252	3.73821	0.000185335	0.00272843
TRIP13	ENSG00000071539.14	33.2959	-1.54966	0.414798	-3.73593	0.000187024	0.00275077
STBD1	ENSG00000118804.8	79.8854	-1.07618	0.288158	-3.7347	0.000187941	0.00275922
CTTNBP2	ENSG00000077063.11	17.6809	2.03205	0.544434	3.7324	0.000189664	0.00278197
OSBPL7	ENSG00000006025.12	103.241	0.754516	0.202198	3.73156	0.000190296	0.00278869
KLHL42	ENSG00000087448.11	229.154	0.547937	0.146881	3.73049	0.000191106	0.00279802
PCLAF	ENSG00000166803.13	28.3722	-1.79054	0.48004	-3.72997	0.000191503	0.00280127
HNRNPA2B1	ENSG00000122566.21	2106.64	-0.291979	0.0783066	-3.72867	0.000192495	0.00281218
NRBP1	ENSG00000115216.14	1489.21	-0.412642	0.110671	-3.72853	0.000192598	0.00281218
TIMM17B	ENSG00000126768.12	180.124	0.628688	0.168638	3.72804	0.000192971	0.00281507
AC120114.4	ENSG00000281348.1	6.70933	6.16335	1.65384	3.7267	0.000194001	0.00282752
TLR7	ENSG00000196664.5	350.059	-0.805016	0.216056	-3.72595	0.000194578	0.00283337
ZNF638	ENSG00000075292.19	1477.83	-0.367736	0.0987666	-3.72328	0.000196652	0.00286098
MFSD14B	ENSG00000148110.16	909.996	-0.364622	0.0979664	-3.72191	0.000197723	0.00287136
EHD3	ENSG00000013016.16	55.6777	-1.54405	0.414977	-3.72082	0.00019858	0.00288071
KLHL6	ENSG00000172578.12	1299.88	-0.378684	0.101779	-3.72063	0.000198725	0.00288071
DOCK3	ENSG00000088538.13	87.8281	-1.49295	0.401427	-3.71911	0.000199927	0.00289552
LMO2	ENSG00000135363.12	280.402	-0.498487	0.134053	-3.71859	0.000200341	0.00289891
VSIG4	ENSG00000155659.15	3174.45	0.692541	0.186304	3.71726	0.000201397	0.00291026
PSMD12	ENSG00000197170.10	280.128	-0.476262	0.128126	-3.71714	0.000201488	0.00291026
LRP8	ENSG00000157193.18	161.737	-0.728863	0.196143	-3.71598	0.000202421	0.0029185
PC	ENSG00000173599.15	284.519	-0.609442	0.164059	-3.71478	0.000203377	0.00292853
ST6GALNAC4	ENSG00000136840.19	175.637	-1.24327	0.334692	-3.71465	0.000203482	0.00292853
GIGYF1	ENSG00000146830.10	545.468	0.41623	0.112207	3.70947	0.000207692	0.00298645
BCAR3	ENSG00000137936.18	113.501	-1.03141	0.278205	-3.70739	0.000209409	0.00300846
CXCR6	ENSG00000172215.6	22.1588	-2.34062	0.631495	-3.70648	0.000210163	0.00301658
TBC1D17	ENSG00000104946.13	167.739	0.593217	0.160068	3.70603	0.000210531	0.00301918
SLC66A1	ENSG00000040487.13	312.761	-0.513673	0.13864	-3.70508	0.000211322	0.00302782
DHRS1	ENSG00000157379.14	296.293	0.616559	0.166442	3.70435	0.000211934	0.00303388
CCT3	ENSG00000163468.15	1493.96	-0.316406	0.0854215	-3.70406	0.000212179	0.00303469
GRAMD4	ENSG00000075240.17	2487.31	0.531202	0.14361	3.69891	0.000216524	0.00309408
SEPTIN7	ENSG00000122545.20	1062.55	-0.327456	0.0886172	-3.69517	0.00021974	0.00313725
ZNF880	ENSG00000221923.9	97.569	-0.790986	0.214209	-3.6926	0.000221975	0.00316635
MYO9B	ENSG00000099331.13	5064.63	0.405896	0.109961	3.69129	0.000223118	0.00317983
GPI	ENSG00000105220.17	2647.75	-0.312167	0.0846088	-3.68954	0.000224664	0.00319902
AGRN	ENSG00000188157.15	297.847	-0.610771	0.165653	-3.68704	0.000226874	0.00322763
RPS3	ENSG00000149273.15	3966.46	0.323395	0.0877182	3.68675	0.000227138	0.00322853
NLRP1	ENSG00000091592.16	383.453	0.619099	0.168081	3.68333	0.000230207	0.00326927
SPSB3	ENSG00000162032.16	239.639	0.518666	0.140843	3.68259	0.000230881	0.00327593
ABCD1	ENSG00000101986.12	367.133	-0.419918	0.114035	-3.68236	0.000231084	0.00327593
H2BC6	ENSG00000274290.2	88.9652	-1.11317	0.302353	-3.68169	0.00023169	0.00328163
NEDD9	ENSG00000111859.17	86.7887	-1.04487	0.283927	-3.68007	0.000233171	0.00329969
DHRS3	ENSG00000162496.9	1072.3	0.423818	0.115175	3.67977	0.000233446	0.00330069
DIP2C	ENSG00000151240.17	41.5082	-1.15523	0.314117	-3.67772	0.000235331	0.00332
ADO	ENSG00000181915.5	325.77	-0.478188	0.130025	-3.67765	0.000235394	0.00332
RAD51	ENSG00000051180.17	39.8289	-1.18025	0.320928	-3.67761	0.000235432	0.00332
HLA-F	ENSG00000204642.14	1416.69	-0.861624	0.234386	-3.67608	0.000236841	0.00333287
TXNDC9	ENSG00000115514.12	210.366	-0.500381	0.13612	-3.67604	0.000236881	0.00333287
CHM	ENSG00000188419.14	326.252	-0.424758	0.115551	-3.67595	0.000236966	0.00333287
UBE2L6	ENSG00000156587.16	1025.56	-0.909592	0.247483	-3.67537	0.000237502	0.00333653
LRCH1	ENSG00000136141.15	359.423	-0.713751	0.194206	-3.67522	0.000237642	0.00333653
CD5	ENSG00000110448.11	139.331	1.01978	0.277607	3.67345	0.000239298	0.00335686
S1PR1	ENSG00000170989.10	351.72	0.817623	0.222736	3.67082	0.000241771	0.00338859
TICRR	ENSG00000140534.14	28.5137	-1.42	0.3869	-3.67021	0.000242355	0.00339382
HSPH1	ENSG00000120694.20	1012.09	-0.325241	0.0886309	-3.66961	0.000242922	0.0033988
SRPX2	ENSG00000102359.7	7.55784	-4.36141	1.18876	-3.66886	0.00024363	0.00340573
C2CD5	ENSG00000111731.12	691.57	-0.386442	0.105356	-3.66796	0.000244498	0.00341303
NAA15	ENSG00000164134.13	489.182	-0.413923	0.112851	-3.66787	0.000244576	0.00341303
HSD17B14	ENSG00000087076.9	448.294	0.583169	0.159022	3.66722	0.000245199	0.00341876
ARHGAP11A	ENSG00000198826.11	124.643	-1.06592	0.290752	-3.66608	0.000246297	0.00343108
TRIP12	ENSG00000153827.13	2812.44	-0.245451	0.0669568	-3.66582	0.000246552	0.00343166
NAE1	ENSG00000159593.15	173.488	-0.703472	0.191971	-3.66447	0.000247848	0.00344655
RHOQ	ENSG00000119729.12	1164.72	-0.326713	0.0891619	-3.66426	0.00024805	0.00344655
SARDH	ENSG00000123453.18	18.3868	-1.7378	0.474338	-3.66364	0.000248661	0.00345075
FBXL15	ENSG00000107872.12	143.814	0.690327	0.188433	3.66351	0.000248782	0.00345075
ADAM8	ENSG00000151651.16	614.162	-0.766437	0.209252	-3.66274	0.000249529	0.00345654
WDFY4	ENSG00000128815.19	2428.84	-0.38877	0.106145	-3.66264	0.00024963	0.00345654
DCLK2	ENSG00000170390.16	7.66508	-3.25668	0.889228	-3.66236	0.000249899	0.00345729
AKAP11	ENSG00000023516.9	720.424	0.40379	0.110342	3.65944	0.000252764	0.00349393
IFITM10	ENSG00000244242.2	29.4433	-1.31675	0.360041	-3.65721	0.000254972	0.0035184
UTY	ENSG00000183878.15	161.704	10.7601	2.94484	3.65388	0.000258304	0.00355522
RPL35A	ENSG00000182899.17	1434.93	0.320984	0.0878573	3.65347	0.000258719	0.00355707
MEIKIN	ENSG00000239642.6	4.50112	-5.72274	1.56645	-3.65331	0.000258881	0.00355707
KIF14	ENSG00000118193.12	68.4952	-1.78206	0.487939	-3.65222	0.000259978	0.00356909
CCR1	ENSG00000163823.4	3682.23	0.418883	0.114714	3.65154	0.000260669	0.00357552
STAB1	ENSG00000010327.10	16792.8	0.670275	0.183699	3.64877	0.000263504	0.0036104
GNPTG	ENSG00000090581.10	1428.82	0.380681	0.104339	3.6485	0.000263779	0.0036104
FAM111B	ENSG00000189057.11	67.6425	-1.67434	0.458926	-3.64839	0.000263885	0.0036104
LEPR	ENSG00000116678.19	68.3018	-1.22681	0.336421	-3.64667	0.000265662	0.00363162
SLC66A3	ENSG00000162976.13	474.793	-0.408566	0.112075	-3.64546	0.000266916	0.00364566
UHRF1	ENSG00000276043.5	100.209	-1.22585	0.336473	-3.64323	0.000269233	0.00367419
SLC37A2	ENSG00000134955.11	6216.5	0.593058	0.162855	3.64162	0.000270926	0.0036886
WNT7A	ENSG00000154764.6	11.3055	2.74444	0.753642	3.64157	0.000270978	0.0036886
LRRC8A	ENSG00000136802.11	272.362	-0.876863	0.240875	-3.64033	0.000272289	0.00370331
APOBEC3A	ENSG00000128383.13	142.215	-3.13463	0.861518	-3.6385	0.000274232	0.00372317
MFN2	ENSG00000116688.17	1212.13	-0.359177	0.0987263	-3.6381	0.000274652	0.00372317
RPL11	ENSG00000142676.14	3687.4	0.334813	0.0920352	3.63788	0.00027489	0.00372317
CD274	ENSG00000120217.14	352.3	-1.64312	0.451672	-3.63787	0.000274907	0.00372317
SSR3	ENSG00000114850.6	1862.37	-0.363634	0.0999659	-3.63758	0.000275216	0.00372422
SC5D	ENSG00000109929.10	293.239	-0.525787	0.144723	-3.63307	0.000280072	0.00378356
GGT7	ENSG00000131067.17	70.3609	0.887231	0.244275	3.6321	0.000281123	0.00379457
LRP1	ENSG00000123384.14	7125.73	0.431144	0.118711	3.63188	0.000281359	0.00379457
GMFB	ENSG00000197045.13	615.964	-0.393813	0.108466	-3.63073	0.000282616	0.00380833
NIBAN3	ENSG00000167483.18	73.656	1.60028	0.440845	3.63003	0.000283391	0.00381558
MYO1E	ENSG00000157483.9	1966.95	-0.560679	0.154512	-3.62872	0.000284829	0.00383172
NDFIP2	ENSG00000102471.14	23.5967	-1.53799	0.423907	-3.62813	0.000285479	0.00383726
SDC1	ENSG00000115884.11	56.0295	-2.23362	0.615739	-3.62755	0.000286127	0.00384276
MYO1B	ENSG00000128641.19	23.5038	-2.10021	0.579055	-3.62696	0.000286774	0.00384822
SRSF7	ENSG00000115875.19	1607.79	0.349627	0.0964066	3.62659	0.000287191	0.00385062
COL9A2	ENSG00000049089.15	60.2902	-1.09002	0.300656	-3.62548	0.000288426	0.00386395
GNA13	ENSG00000120063.10	1397.54	-0.367122	0.101321	-3.62336	0.000290805	0.00389257
PCM1	ENSG00000078674.17	1839.36	-0.290351	0.0801716	-3.62161	0.000292772	0.00391424
MMP17	ENSG00000198598.6	19.0332	1.91888	0.529858	3.62149	0.000292911	0.00391424
ROCK1	ENSG00000067900.8	1202.3	-0.391922	0.108282	-3.61946	0.000295221	0.00394184
MDM4	ENSG00000198625.13	696.228	0.37303	0.10308	3.61886	0.000295908	0.00394773
RNASE6	ENSG00000169413.3	1029.75	0.428088	0.118331	3.61772	0.00029721	0.00396181
MBOAT7	ENSG00000125505.17	351.921	-0.473348	0.130874	-3.61683	0.000298229	0.0039721
PRKCD	ENSG00000163932.15	572.053	-0.446948	0.123615	-3.61564	0.00029961	0.00398435
ABL2	ENSG00000143322.21	851.817	-0.481011	0.133044	-3.61542	0.000299862	0.00398435
TIAM1	ENSG00000156299.13	642.387	-0.37586	0.103961	-3.61539	0.000299892	0.00398435
ZNF704	ENSG00000164684.13	200.053	0.930403	0.257441	3.61405	0.000301453	0.00400178
TRPS1	ENSG00000104447.12	1448.6	0.37606	0.104096	3.61262	0.000303118	0.00402056
FBXW4	ENSG00000107829.15	185.37	0.545153	0.150937	3.61179	0.000304087	0.00403009
HOXB2	ENSG00000173917.10	20.3955	2.02741	0.561562	3.61031	0.000305832	0.00404988
UBXN11	ENSG00000158062.20	514.225	0.736362	0.204001	3.6096	0.000306667	0.0040576
ATP6V1H	ENSG00000047249.18	1645.82	-0.587405	0.16279	-3.60837	0.00030813	0.00407025
FCGR3A	ENSG00000203747.11	5260.17	0.574039	0.159132	3.60732	0.00030938	0.00408341
STS	ENSG00000101846.7	145.931	-0.929089	0.257697	-3.60535	0.000311731	0.00410433
HBA2	ENSG00000188536.13	37.8994	2.35343	0.652981	3.60413	0.000313199	0.00412029
GNG5	ENSG00000174021.11	286.87	-0.530509	0.147205	-3.60387	0.000313519	0.00412113
HIP1R	ENSG00000130787.14	154.701	0.916335	0.254537	3.60002	0.000318199	0.00417922
ATP1B3	ENSG00000069849.11	1426.77	-0.302617	0.0840793	-3.59918	0.00031922	0.00418921
SRP54	ENSG00000100883.12	548.583	-0.37263	0.103544	-3.59875	0.000319751	0.00419041
CTAG2	ENSG00000126890.13	3.40756	-5.31486	1.47689	-3.59868	0.000319833	0.00419041
PHF1	ENSG00000112511.17	348.004	0.502907	0.139876	3.59539	0.000323908	0.00424034
ETFB	ENSG00000105379.9	294.472	0.489181	0.136149	3.59297	0.00032693	0.00427642
GLIPR2	ENSG00000122694.16	687.861	-0.554885	0.154459	-3.59245	0.000327589	0.00428156
H3C8	ENSG00000273983.1	102.986	-1.15254	0.320858	-3.59205	0.000328089	0.0042828
PCNA	ENSG00000132646.11	488.407	-0.625329	0.174092	-3.59195	0.000328216	0.0042828
PELI1	ENSG00000197329.12	296.199	0.476117	0.132671	3.58872	0.000332309	0.00433269
CCNB1	ENSG00000134057.15	170.684	-1.04905	0.292391	-3.58782	0.000333453	0.00434408
PTGES3	ENSG00000110958.16	605.417	-0.490512	0.136765	-3.58654	0.0003351	0.004362
GPRC5B	ENSG00000167191.12	17.8755	3.33899	0.931209	3.58565	0.000336241	0.00437331
RNF216	ENSG00000011275.18	857.957	0.366429	0.102203	3.58531	0.000336672	0.00437538
DNAJB5	ENSG00000137094.14	65.0519	-1.17647	0.328269	-3.58388	0.000338532	0.00439439
PSMB8	ENSG00000204264.11	901.596	-0.815582	0.227577	-3.58376	0.000338682	0.00439439
CIRBP	ENSG00000099622.14	1066.5	0.31472	0.0878362	3.58304	0.000339623	0.00440305
AC073585.2	ENSG00000286088.1	4.49042	5.59617	1.56209	3.58248	0.000340343	0.00440882
SFXN3	ENSG00000107819.13	999.461	-0.322781	0.0901513	-3.58043	0.000343023	0.00443997
SORBS1	ENSG00000095637.22	9.49716	-2.82168	0.788262	-3.57963	0.000344087	0.00445015
FOCAD	ENSG00000188352.12	535.007	-0.51093	0.14278	-3.57845	0.000345644	0.0044667
KIF23	ENSG00000137807.15	92.3712	-1.21722	0.340194	-3.57801	0.000346214	0.00447047
NME1	ENSG00000239672.7	207.376	-0.628741	0.17587	-3.57504	0.000350174	0.00451747
RALGPS2	ENSG00000116191.17	135.559	0.777572	0.217749	3.57095	0.000355684	0.00458172
MAPK6	ENSG00000069956.12	749.035	-0.390608	0.109441	-3.56912	0.000358183	0.00461021
MAFF	ENSG00000185022.12	183.59	-0.959849	0.268985	-3.56841	0.00035915	0.00461895
SKIL	ENSG00000136603.14	488.515	0.584001	0.163739	3.56666	0.000361555	0.00464492
ITGA9	ENSG00000144668.12	148.557	1.18691	0.332793	3.56652	0.000361747	0.00464492
MBP	ENSG00000197971.16	3071.53	0.372268	0.104386	3.56626	0.000362109	0.00464587
RAB11FIP5	ENSG00000135631.17	102.143	0.889116	0.249497	3.56364	0.000365751	0.00468511
ABLIM3	ENSG00000173210.19	253.955	0.488623	0.137154	3.56259	0.00036722	0.00470018
RPS12	ENSG00000112306.8	3568.41	0.325469	0.0913742	3.56194	0.000368128	0.00470544
EEPD1	ENSG00000122547.11	462.042	0.488071	0.137026	3.56187	0.000368216	0.00470544
SLC16A6	ENSG00000108932.12	189.968	1.16153	0.326453	3.55802	0.000373659	0.00476741
FCRL6	ENSG00000181036.14	26.7571	2.1298	0.599155	3.55468	0.000378445	0.00482464
ATP6V0D2	ENSG00000147614.4	2044.17	0.482872	0.135875	3.55381	0.0003797	0.00483299
SGPL1	ENSG00000166224.17	2430.84	0.369078	0.103941	3.55085	0.000383982	0.00488362
ETV7	ENSG00000010030.14	17.7541	-3.38757	0.954313	-3.54975	0.000385598	0.0048972
ZFY	ENSG00000067646.12	110.297	10.2082	2.87578	3.54971	0.000385659	0.0048972
NCLN	ENSG00000125912.11	501.729	-0.612057	0.172615	-3.5458	0.000391428	0.00496654
SMC1A	ENSG00000072501.18	1173.59	-0.469144	0.132335	-3.54514	0.000392409	0.00497505
YPEL3	ENSG00000090238.12	153.858	0.683862	0.192927	3.54467	0.000393101	0.0049799
C7orf50	ENSG00000146540.15	375.35	0.523861	0.147802	3.54435	0.000393589	0.00498216
RXRA	ENSG00000186350.12	2220.91	0.515607	0.145503	3.54362	0.000394678	0.00499201
FSCN1	ENSG00000075618.18	316.704	-0.615064	0.173643	-3.54211	0.000396934	0.00501659
OTUD3	ENSG00000169914.6	117.56	0.67779	0.191459	3.54014	0.000399919	0.0050483
CHMP7	ENSG00000147457.14	702.511	0.335668	0.0948232	3.53994	0.000400219	0.0050483
VOPP1	ENSG00000154978.13	1346.97	-0.303745	0.0858116	-3.53968	0.000400617	0.0050483
PSMC2	ENSG00000161057.12	1177.75	-0.293461	0.0829073	-3.53962	0.000400698	0.0050483
BRCA1	ENSG00000012048.23	177.023	-0.7681	0.217029	-3.53916	0.000401403	0.00505322
CDC20	ENSG00000117399.14	79.6219	-1.45823	0.412057	-3.53891	0.000401789	0.00505412
PSMA5	ENSG00000143106.13	600.411	-0.47419	0.13404	-3.53768	0.000403651	0.00507184
GPRASP1	ENSG00000198932.13	135.241	0.823125	0.232681	3.53757	0.000403829	0.00507184
RASGRP4	ENSG00000171777.16	212.407	0.563678	0.159357	3.5372	0.000404398	0.00507503
TUBGCP2	ENSG00000130640.13	825.74	-0.388361	0.109818	-3.53639	0.000405629	0.00508254
RPS6KA1	ENSG00000117676.14	2521.31	-0.479122	0.135503	-3.53587	0.00040643	0.00508861
STAG3	ENSG00000066923.17	131.597	-0.60856	0.172182	-3.5344	0.000408695	0.00511298
CYCS	ENSG00000172115.9	582.676	-0.412472	0.116785	-3.53188	0.000412609	0.00515711
TMSB10	ENSG00000034510.6	5843.03	-0.575598	0.162979	-3.53172	0.000412864	0.00515711
MEMO1	ENSG00000162959.13	305.92	-0.431532	0.12223	-3.53048	0.000414802	0.0051773
VKORC1L1	ENSG00000196715.7	153.203	-0.634932	0.179879	-3.52977	0.00041592	0.00518723
THOP1	ENSG00000172009.15	196.41	-0.526418	0.149175	-3.52886	0.000417356	0.0052011
DHRSX	ENSG00000169084.15	402.286	0.505504	0.143279	3.52812	0.000418529	0.00520994
KANK2	ENSG00000197256.10	164.546	0.888768	0.251919	3.528	0.000418714	0.00520994
CNKSR3	ENSG00000153721.19	7.17776	-4.28121	1.21373	-3.52732	0.000419783	0.0052192
GSDME	ENSG00000105928.16	1113.67	0.811485	0.230091	3.5268	0.000420616	0.00522553
CCNF	ENSG00000162063.13	160.077	-0.649273	0.184329	-3.52236	0.000427718	0.00530555
PHTF2	ENSG00000006576.16	313.181	-0.546857	0.155289	-3.52155	0.000429029	0.00531771
GTF2IRD2B	ENSG00000174428.18	108.201	0.924468	0.262574	3.52079	0.000430268	0.00532723
EPB41	ENSG00000159023.21	1733.96	0.314122	0.0892223	3.52067	0.00043046	0.00532723
RPS28	ENSG00000233927.5	1036.54	0.343427	0.0975897	3.5191	0.00043302	0.00535089
RPL24	ENSG00000114391.13	1306.25	0.305547	0.0868272	3.51902	0.000433142	0.00535089
SYNDIG1	ENSG00000101463.6	11.1942	2.7054	0.768823	3.51888	0.00043337	0.00535089
PLBD1	ENSG00000121316.11	684.662	-0.598549	0.170108	-3.51864	0.000433763	0.00535164
GTF2H3	ENSG00000111358.14	273.303	-0.558886	0.158978	-3.5155	0.000438924	0.00541115
B3GNT8	ENSG00000177191.2	156.988	0.789158	0.22456	3.51423	0.000441026	0.0054329
SCIN	ENSG00000006747.15	166.249	-1.28639	0.366196	-3.51285	0.000443334	0.00545658
SRSF8	ENSG00000263465.4	215.064	0.490007	0.139497	3.51267	0.000443636	0.00545658
ZNF385C	ENSG00000187595.16	6.70791	4.25706	1.21199	3.51247	0.000443967	0.00545658
UCK2	ENSG00000143179.16	103.638	-0.729528	0.207743	-3.51168	0.000445284	0.00546859
RHOBTB3	ENSG00000164292.13	96.6548	-0.915514	0.26077	-3.51082	0.000446735	0.00548222
TM9SF2	ENSG00000125304.10	2845.28	-0.261962	0.074669	-3.50832	0.000450949	0.00552972
FASN	ENSG00000169710.9	259.687	-0.642451	0.183189	-3.50704	0.000453125	0.00555217
NSG1	ENSG00000168824.14	30.9502	1.90025	0.542149	3.50503	0.000456548	0.00557861
CFL1	ENSG00000172757.13	6627.44	-0.347729	0.0992109	-3.50495	0.000456702	0.00557861
ZNF331	ENSG00000130844.18	415.896	0.411219	0.117329	3.50485	0.000456873	0.00557861
ACSL5	ENSG00000197142.10	856.805	-0.349215	0.0996494	-3.50444	0.000457575	0.00558117
AKAP3	ENSG00000111254.8	16.1573	1.79468	0.512287	3.50328	0.000459573	0.00560032
PPP5C	ENSG00000011485.15	247.884	-0.483392	0.137989	-3.50312	0.000459842	0.00560032
PTGES3L	ENSG00000267060.5	4.50846	-4.95059	1.41342	-3.50257	0.000460793	0.00560648
PSMC3	ENSG00000165916.8	695.687	-0.37113	0.105993	-3.50145	0.000462734	0.00562276
CBX3	ENSG00000122565.19	617.051	-0.364013	0.103995	-3.50029	0.000464747	0.00564295
TBC1D9B	ENSG00000197226.12	2962.34	0.395338	0.112951	3.50008	0.000465112	0.00564312
CCNG1	ENSG00000113328.19	462.282	-0.506716	0.144797	-3.49948	0.000466168	0.00565167
ABHD14B	ENSG00000114779.19	359.144	0.491198	0.140389	3.49885	0.00046727	0.00566076
SLX1B	ENSG00000181625.17	323.093	0.965937	0.276363	3.49518	0.000473749	0.00573493
CDC123	ENSG00000151465.14	394.714	-0.42161	0.120696	-3.49316	0.000477338	0.00576969
PPP1R18	ENSG00000146112.12	1300.58	-0.314412	0.0900232	-3.49257	0.000478402	0.0057782
RPS6	ENSG00000137154.13	5261.21	0.355108	0.101846	3.48673	0.000488967	0.00589695
MTMR6	ENSG00000139505.11	728.23	-0.338399	0.0970644	-3.48634	0.000489681	0.00590114
CCNL2	ENSG00000221978.12	775.663	0.450487	0.129267	3.48493	0.000492257	0.00592773
ARAP2	ENSG00000047365.12	650.727	-0.510083	0.146416	-3.4838	0.000494357	0.00594857
ZNF211	ENSG00000121417.14	277.36	0.48054	0.13798	3.48268	0.00049643	0.00596326
BATF2	ENSG00000168062.10	89.2542	-1.65299	0.47465	-3.48253	0.000496691	0.00596326
PMF1	ENSG00000160783.19	245.039	0.501993	0.144188	3.48151	0.000498595	0.00598165
CFH	ENSG00000000971.16	80.0912	-1.50017	0.430978	-3.48085	0.000499829	0.00599199
NECTIN2	ENSG00000130202.10	384.917	-0.622593	0.178951	-3.47913	0.000503048	0.00602608
CCZ1	ENSG00000122674.12	350.093	-0.579911	0.166825	-3.47617	0.000508638	0.00608851
CDK14	ENSG00000058091.17	104.938	-0.857124	0.246797	-3.47299	0.000514685	0.00615631
EDNRB	ENSG00000136160.17	47.9361	1.13886	0.327952	3.47265	0.000515343	0.0061596
STRAP	ENSG00000023734.11	381.881	-0.449834	0.129548	-3.47234	0.000515946	0.00616131
ACOT7	ENSG00000097021.19	68.1877	-1.07639	0.310005	-3.47217	0.000516262	0.00616131
PDGFA	ENSG00000197461.13	6.70386	-3.80968	1.09726	-3.47198	0.000516636	0.00616131
NBN	ENSG00000104320.13	922.662	-0.379342	0.109296	-3.47078	0.000518952	0.00618434
TCF19	ENSG00000137310.12	204.766	-0.795563	0.229329	-3.46909	0.000522221	0.00621868
JRK	ENSG00000234616.9	429.235	0.378363	0.109148	3.46652	0.000527244	0.00627385
TSPAN14	ENSG00000108219.15	1298.77	0.346648	0.100187	3.46	0.000540167	0.00641813
CFD	ENSG00000197766.8	985.116	0.523922	0.151604	3.45586	0.000548544	0.00651284
FJX1	ENSG00000179431.7	39.6629	1.31175	0.379968	3.45226	0.000555917	0.00659065
AP4E1	ENSG00000081014.11	183.2	-0.548885	0.159032	-3.45142	0.000557655	0.00660638
AIFM2	ENSG00000042286.15	179.471	-0.521992	0.151331	-3.44935	0.000561934	0.00665217
TMEM26	ENSG00000196932.12	324.635	0.815908	0.236588	3.44864	0.000563411	0.00666381
TSKU	ENSG00000182704.8	146.906	0.746039	0.216351	3.44829	0.000564155	0.00666381
RPL18A	ENSG00000105640.13	2019.68	0.292607	0.0848558	3.44828	0.000564163	0.00666381
ENTPD7	ENSG00000198018.7	199.701	-0.605928	0.175729	-3.44809	0.000564575	0.00666381
TWF1	ENSG00000151239.13	408.911	-0.458888	0.133127	-3.44699	0.000566867	0.00668595
ZBTB39	ENSG00000166860.3	147.006	0.612376	0.17778	3.44457	0.000571976	0.00673632
ACKR4	ENSG00000129048.7	7.16643	-3.47603	1.00935	-3.44383	0.000573529	0.00674967
PIK3CG	ENSG00000105851.11	749.036	-0.353925	0.102822	-3.44212	0.000577173	0.00678758
LAMP3	ENSG00000078081.8	7.63595	-4.4099	1.28132	-3.44169	0.000578092	0.00679343
ATP8A1	ENSG00000124406.16	1152.26	0.717337	0.208505	3.44037	0.000580909	0.00682154
ARSG	ENSG00000141337.12	79.3871	0.780227	0.226827	3.43974	0.000582273	0.00683257
S100A16	ENSG00000188643.11	4.87345	-5.0774	1.47628	-3.43931	0.000583192	0.00683836
MYO1F	ENSG00000142347.19	3722.06	0.529573	0.154057	3.43752	0.000587074	0.00687887
TPSAB1	ENSG00000172236.17	16.3327	1.89046	0.550017	3.4371	0.000587969	0.00688372
MCAM	ENSG00000076706.17	3.26193	-5.24714	1.52669	-3.43693	0.000588345	0.00688372
IBTK	ENSG00000005700.15	835.395	-0.297361	0.0865314	-3.43645	0.000589396	0.00688729
SELENOF	ENSG00000183291.17	852.515	-0.328804	0.0956862	-3.43627	0.00058978	0.00688729
CRYZ	ENSG00000116791.14	219.425	-0.610213	0.177584	-3.4362	0.000589935	0.00688729
BUB3	ENSG00000154473.18	555.618	-0.356684	0.103846	-3.43473	0.000593155	0.00691986
SLC38A7	ENSG00000103042.9	875.075	0.340657	0.0991927	3.4343	0.000594086	0.00692172
NRDC	ENSG00000078618.21	1130.35	-0.372128	0.108363	-3.43408	0.000594574	0.00692172
OSBPL10	ENSG00000144645.14	21.4086	1.64215	0.478194	3.43406	0.000594607	0.00692172
TARS3	ENSG00000185418.16	104.85	0.72145	0.21013	3.43334	0.000596185	0.00693508
ZWILCH	ENSG00000174442.12	103.773	-0.736514	0.21455	-3.43282	0.000597328	0.00694335
GNA11	ENSG00000088256.9	108.358	-0.880307	0.256474	-3.43234	0.000598387	0.00695063
SEZ6L2	ENSG00000174938.14	16.7199	-1.9775	0.576333	-3.43118	0.00060096	0.00697044
RPL32	ENSG00000144713.13	2399.83	0.276474	0.0806394	3.42852	0.00060689	0.0070296
ATXN7	ENSG00000163635.18	285.317	0.604474	0.176309	3.4285	0.000606934	0.0070296
VMP1	ENSG00000062716.13	2481.7	-0.50181	0.146376	-3.42823	0.00060752	0.00703131
MTMR1	ENSG00000063601.17	345.328	-0.673576	0.196534	-3.42728	0.000609649	0.00705088
RAI14	ENSG00000039560.14	115.508	-1.20412	0.35139	-3.42673	0.000610896	0.00706021
TLE3	ENSG00000140332.16	642.207	0.470473	0.137306	3.42646	0.000611493	0.00706204
STEAP3	ENSG00000115107.20	469.123	-0.650937	0.190022	-3.42559	0.000613476	0.00707828
DUSP3	ENSG00000108861.9	1811.1	-0.526117	0.153591	-3.42545	0.000613779	0.00707828
ACTR2	ENSG00000138071.13	3410.95	-0.344179	0.100496	-3.42481	0.000615238	0.00709001
H2AC19	ENSG00000272196.2	415.798	-1.03481	0.302223	-3.424	0.000617077	0.00710611
HSPA4	ENSG00000170606.15	1894.78	-0.323858	0.0946457	-3.42179	0.000622097	0.00715879
RPL12	ENSG00000197958.13	4083.64	0.347754	0.101694	3.4196	0.000627126	0.0072115
SPHK1	ENSG00000176170.13	163.622	-1.13313	0.331555	-3.41762	0.000631707	0.00725415
RIPK2	ENSG00000104312.8	259.637	-0.629823	0.184298	-3.41741	0.000632188	0.00725415
ITGB3	ENSG00000259207.8	148.258	-0.980401	0.287094	-3.41491	0.000638038	0.00731604
DIRAS2	ENSG00000165023.7	3.12641	-5.19225	1.5208	-3.41416	0.000639783	0.00733082
CSRP2	ENSG00000175183.10	7.08454	-4.3456	1.27448	-3.40972	0.000650301	0.00744074
MRPL12	ENSG00000262814.8	109.35	-0.633711	0.185902	-3.40885	0.000652375	0.00745916
IGF2BP3	ENSG00000136231.14	131.272	-1.46637	0.430215	-3.40845	0.00065334	0.00746488
IRS2	ENSG00000185950.9	108.732	0.690971	0.202768	3.4077	0.000655128	0.00747999
FERMT2	ENSG00000073712.15	15.7467	-2.288	0.67161	-3.40674	0.000657441	0.00750108
TRIM44	ENSG00000166326.7	915.628	0.347101	0.101948	3.40468	0.000662412	0.00755243
FGFBP2	ENSG00000137441.8	25.8281	1.97013	0.578798	3.40383	0.00066448	0.00757065
DERL1	ENSG00000136986.10	643.702	-0.314248	0.0923326	-3.40343	0.000665446	0.00757628
TUBB	ENSG00000196230.13	6292.07	-0.265381	0.077992	-3.40266	0.000667328	0.00759233
RAB7B	ENSG00000276600.5	748.862	-0.784217	0.230757	-3.39845	0.000677694	0.00769937
YWHAB	ENSG00000166913.13	2243.32	-0.247995	0.0729967	-3.39734	0.000680447	0.00772518
CCT2	ENSG00000166226.13	812.396	-0.378493	0.111425	-3.39684	0.00068169	0.00773383
VPS37A	ENSG00000155975.10	350.566	-0.442761	0.130546	-3.3916	0.000694857	0.00786423
SNX14	ENSG00000135317.13	718.587	-0.477748	0.14097	-3.389	0.00070149	0.00793049
UROD	ENSG00000126088.14	1052.49	0.456404	0.134713	3.38798	0.000704097	0.00794715
SNX2	ENSG00000205302.7	2401.24	-0.353436	0.104325	-3.38784	0.000704447	0.00794715
LILRA6	ENSG00000244482.10	845.163	0.507538	0.14983	3.38743	0.000705502	0.00795347
DEGS1	ENSG00000143753.13	960.027	0.368195	0.108764	3.38528	0.00071106	0.00801051
SPRED1	ENSG00000166068.13	837.619	-0.449903	0.132919	-3.38479	0.000712338	0.00801929
ARL17A	ENSG00000185829.17	229.968	0.512491	0.151526	3.38219	0.000719097	0.00808972
FTH1	ENSG00000167996.16	35315.7	0.39375	0.116466	3.38081	0.000722721	0.00812479
EFCAB13	ENSG00000178852.16	43.5465	1.20956	0.357813	3.38043	0.000723712	0.00813026
AIDA	ENSG00000186063.13	346.7	-0.421929	0.124838	-3.37981	0.000725363	0.00814311
AC068831.8	ENSG00000284946.1	56.1586	-1.29697	0.383972	-3.37778	0.000730725	0.00819758
CPOX	ENSG00000080819.9	273.086	-0.486899	0.144199	-3.37658	0.000733923	0.00822199
DENND1B	ENSG00000213047.13	302.232	-0.608234	0.180156	-3.37615	0.000735079	0.0082292
PLXNB2	ENSG00000196576.15	1419.6	-0.319556	0.0946672	-3.37557	0.000736622	0.00824074
XRN2	ENSG00000088930.8	1392.84	-0.274908	0.081458	-3.37485	0.000738567	0.00825398
NCR3	ENSG00000204475.10	13.162	-2.6465	0.78439	-3.37396	0.000740948	0.00826773
CAND1	ENSG00000111530.13	1062.28	-0.293806	0.0870818	-3.37391	0.000741092	0.00826773
CDRT4	ENSG00000239704.11	13.7355	4.33688	1.28595	3.37251	0.00074486	0.008304
OGG1	ENSG00000114026.21	173.552	0.568517	0.168746	3.36908	0.000754198	0.00840227
RPS17	ENSG00000182774.13	2306.07	0.369092	0.109585	3.36807	0.000756957	0.00842718
CD79A	ENSG00000105369.10	75.0104	1.08704	0.323149	3.36391	0.000768471	0.00854943
GBP2	ENSG00000162645.13	1076.33	-1.45047	0.431913	-3.35824	0.000784417	0.00871478
NUSAP1	ENSG00000137804.14	220.419	-0.926752	0.2761	-3.35658	0.000789133	0.00876112
DCK	ENSG00000156136.10	310.939	-0.469055	0.139754	-3.35629	0.000789963	0.00876429
TENT5A	ENSG00000112773.16	713.118	0.361369	0.10769	3.35562	0.000791859	0.00877925
KLHL32	ENSG00000186231.17	11.9842	-2.53431	0.755965	-3.35242	0.000801085	0.00887542
CDC25A	ENSG00000164045.12	26.895	-1.51629	0.452512	-3.35082	0.000805715	0.00891663
P2RY14	ENSG00000174944.9	11.4603	-3.42511	1.02276	-3.3489	0.000811333	0.0089652
CDCA2	ENSG00000184661.14	50.2968	-1.48679	0.443966	-3.34887	0.000811419	0.0089652
ZNF335	ENSG00000198026.8	328.606	0.412237	0.123128	3.34803	0.000813884	0.00898626
NFAM1	ENSG00000235568.7	1069.82	0.369416	0.110356	3.3475	0.000815428	0.00899713
PAQR7	ENSG00000182749.5	74.5061	0.983339	0.293957	3.34518	0.000822305	0.00906481
ADD3	ENSG00000148700.15	858.067	0.328736	0.0982785	3.34494	0.000822993	0.00906481
PCNX3	ENSG00000197136.4	390.227	0.465531	0.139178	3.34486	0.000823254	0.00906481
LIG4	ENSG00000174405.13	184.008	-0.513959	0.153686	-3.34421	0.000825172	0.00907972
HMG20B	ENSG00000064961.19	519.238	-0.601969	0.180032	-3.34368	0.000826753	0.00909089
SEC23A	ENSG00000100934.15	857.577	-0.296127	0.0886018	-3.34222	0.000831113	0.00913259
PRKCB	ENSG00000166501.14	1783.87	-0.372462	0.111449	-3.34201	0.000831749	0.00913333
SLC8A1	ENSG00000183023.18	895.271	-0.432272	0.129407	-3.34041	0.000836556	0.0091711
GHITM	ENSG00000165678.21	2040.26	-0.265377	0.0794451	-3.34039	0.000836613	0.0091711
ATP6V1D	ENSG00000100554.12	1127.62	-0.385962	0.115547	-3.34029	0.0008369	0.0091711
ACTR10	ENSG00000131966.14	452.794	-0.391622	0.117312	-3.33829	0.000842965	0.00922499
EEF1G	ENSG00000254772.10	8302.22	0.284032	0.0850996	3.33764	0.000844921	0.00924011
LY75	ENSG00000054219.11	497.174	-0.743204	0.222843	-3.33511	0.000852659	0.00931839
LETMD1	ENSG00000050426.16	287.43	0.477478	0.14327	3.3327	0.000860068	0.00939297
EIF3CL	ENSG00000205609.12	603.683	0.776097	0.232915	3.3321	0.000861942	0.00940705
RUNX3	ENSG00000020633.18	251.219	0.641113	0.19245	3.33132	0.000864366	0.0094271
UBD	ENSG00000213886.4	35.4789	-8.69457	2.61027	-3.33091	0.00086563	0.00943449
WDR83	ENSG00000123154.12	144.258	-0.55706	0.16727	-3.3303	0.000867519	0.00944867
NCAPD2	ENSG00000010292.13	606.304	-0.431455	0.129644	-3.32799	0.000874756	0.00952104
CD28	ENSG00000178562.18	584.603	0.654016	0.19663	3.32613	0.000880603	0.00957819
PFN2	ENSG00000070087.14	7.80461	3.08191	0.926847	3.32516	0.000883694	0.00960531
DTX4	ENSG00000110042.8	111.034	-1.06149	0.319516	-3.32218	0.000893163	0.00970168
CENPA	ENSG00000115163.15	23.9041	-1.62262	0.488478	-3.32178	0.000894455	0.00970915
NLRC3	ENSG00000167984.18	201.249	0.817059	0.246007	3.32129	0.000896029	0.00971967
SKA1	ENSG00000154839.10	39.0299	-1.44022	0.433851	-3.31963	0.000901376	0.00977108
RTRAF	ENSG00000087302.9	491.672	-0.384029	0.115721	-3.31857	0.000904786	0.00980144
SH3BGRL3	ENSG00000142669.15	2330.87	-0.607509	0.183244	-3.3153	0.000915455	0.00991034
EIF4A1	ENSG00000161960.15	7732.8	-0.237362	0.071608	-3.31474	0.000917285	0.00991809
LSS	ENSG00000160285.15	1105.72	-0.429974	0.129717	-3.3147	0.000917405	0.00991809
NUTM2D	ENSG00000214562.14	59.5512	1.00019	0.301786	3.31425	0.000918895	0.00992752
RCN1	ENSG00000049449.9	214.68	-0.807512	0.243673	-3.31392	0.000919966	0.00993242
JDP2	ENSG00000140044.13	512.201	0.741376	0.223833	3.31218	0.00092572	0.00998784
ATG16L2	ENSG00000168010.11	589.781	0.4675	0.141157	3.31191	0.000926622	0.00999086
TMEM217	ENSG00000172738.12	7.44737	-2.95306	0.891936	-3.31085	0.000930147	0.0100177
C1R	ENSG00000159403.18	8.74964	-3.00757	0.908417	-3.31078	0.000930354	0.0100177
DDX51	ENSG00000185163.10	102.86	0.671867	0.202953	3.31046	0.000931443	0.0100227
AP3M1	ENSG00000185009.12	619.504	-0.341331	0.103145	-3.30925	0.000935478	0.0100594
CDS1	ENSG00000163624.6	22.6972	-1.50323	0.454392	-3.30822	0.000938895	0.0100894
ACBD4	ENSG00000181513.14	85.1222	0.746832	0.225771	3.30791	0.000939939	0.0100905
MERTK	ENSG00000153208.17	1168.08	0.632073	0.191085	3.30782	0.000940253	0.0100905
CELF6	ENSG00000140488.16	159.855	0.766052	0.231659	3.30681	0.000943658	0.0101202
FAM89B	ENSG00000176973.8	276.916	-0.541888	0.16388	-3.30661	0.000944318	0.0101206
ITPRIP	ENSG00000148841.17	260.427	-0.649337	0.196475	-3.30493	0.000950005	0.010168
MBNL3	ENSG00000076770.14	350.515	0.570978	0.172847	3.30337	0.000955308	0.010215
STAT1	ENSG00000115415.19	7236.7	-2.28631	0.692136	-3.30326	0.000955668	0.010215
MEST	ENSG00000106484.16	31.2687	1.13686	0.344351	3.30146	0.000961831	0.0102686
ITGAX	ENSG00000140678.16	5954.68	-0.409486	0.124045	-3.30111	0.000963016	0.0102686
PGAM1	ENSG00000171314.9	3103.28	-0.324471	0.0982931	-3.30105	0.000963234	0.0102686
NUP188	ENSG00000095319.14	532.408	-0.3609	0.109329	-3.30105	0.000963237	0.0102686
CENPQ	ENSG00000031691.7	23.0341	-1.33971	0.405906	-3.30053	0.000965019	0.0102807
RNFT1	ENSG00000189050.16	198.821	-0.531827	0.16115	-3.30019	0.000966183	0.0102863
PPM1E	ENSG00000175175.6	5.79099	-4.61659	1.39899	-3.29995	0.000967022	0.0102884
SMAD7	ENSG00000101665.9	343.461	1.05553	0.319949	3.29906	0.00097008	0.0103142
VARS1	ENSG00000204394.13	286.023	-0.451488	0.136892	-3.29812	0.000973339	0.0103362
VPS29	ENSG00000111237.19	502.156	-0.444943	0.134909	-3.29809	0.000973434	0.0103362
GPR157	ENSG00000180758.12	136.625	0.838086	0.254127	3.2979	0.000974093	0.0103363
PRKD3	ENSG00000115825.10	530.765	-0.41913	0.127133	-3.29679	0.00097798	0.0103682
DNAJA1	ENSG00000086061.16	1459.64	-0.35445	0.107518	-3.29667	0.000978384	0.0103682
PHKA1	ENSG00000067177.15	40.0983	-1.33834	0.406079	-3.29577	0.000981539	0.010381
MESD	ENSG00000117899.11	613.738	-0.342056	0.103789	-3.29568	0.00098184	0.010381
ATAD2	ENSG00000156802.13	287.709	-0.775324	0.235262	-3.29558	0.000982174	0.010381
VASP	ENSG00000125753.14	1346.54	-0.391344	0.118779	-3.29474	0.000985138	0.0104054
OSBPL11	ENSG00000144909.8	852.474	-0.349561	0.106156	-3.2929	0.000991596	0.0104668
HSPA9	ENSG00000113013.15	2687.73	-0.292795	0.0889309	-3.29238	0.000993415	0.0104791
TAF1	ENSG00000147133.15	502.857	0.400997	0.121959	3.28797	0.00100913	0.0106379
FGL2	ENSG00000127951.7	1602.89	-0.708302	0.21544	-3.2877	0.0010101	0.0106411
MOB3B	ENSG00000120162.10	33.9206	-1.35473	0.412123	-3.28719	0.00101191	0.0106533
KCNMA1	ENSG00000156113.23	358.878	0.998064	0.303704	3.28631	0.0010151	0.0106796
GPR35	ENSG00000178623.12	103.645	1.40922	0.428838	3.28613	0.00101575	0.0106796
RAB11A	ENSG00000103769.10	767.994	-0.426715	0.129891	-3.28517	0.00101921	0.010709
TPM4	ENSG00000167460.17	3677.47	-0.505366	0.153851	-3.28477	0.00102065	0.0107094
GTF3C6	ENSG00000155115.7	300.015	-0.493358	0.150197	-3.28473	0.00102079	0.0107094
NSMCE3	ENSG00000185115.6	219.07	0.533263	0.162352	3.28461	0.00102124	0.0107094
GTPBP4	ENSG00000107937.19	307.806	-0.44506	0.135524	-3.28399	0.0010235	0.0107207
TGIF2	ENSG00000118707.10	105.103	-0.661472	0.201426	-3.28394	0.00102365	0.0107207
BTBD1	ENSG00000064726.10	896.973	-0.332858	0.101389	-3.28298	0.00102716	0.0107504
ZNF460	ENSG00000197714.9	357.846	0.426628	0.130041	3.28073	0.00103538	0.0108294
OLFML2B	ENSG00000162745.10	567.489	0.536262	0.163509	3.27972	0.00103912	0.0108614
CCNB2	ENSG00000157456.8	62.5596	-1.22388	0.373268	-3.27883	0.00104237	0.0108884
TBC1D1	ENSG00000065882.16	1411.83	-0.344971	0.105224	-3.27843	0.00104385	0.0108896
KANK4	ENSG00000132854.19	6.77631	-4.23989	1.29377	-3.27717	0.00104853	0.0109314
SGPP1	ENSG00000126821.8	309.506	-0.482995	0.147414	-3.27645	0.00105122	0.0109523
IL15	ENSG00000164136.17	30.8748	-1.69875	0.518567	-3.27586	0.00105341	0.010968
YME1L1	ENSG00000136758.18	1460.61	-0.263998	0.0806123	-3.27492	0.00105693	0.0109905
LGALS9	ENSG00000168961.17	1621.07	-0.515022	0.157263	-3.27492	0.00105693	0.0109905
STOX2	ENSG00000173320.12	75.2745	1.05772	0.323006	3.27462	0.00105805	0.0109949
ZBED2	ENSG00000177494.6	8.64437	-4.10742	1.25477	-3.27346	0.0010624	0.0110331
CDC6	ENSG00000094804.12	46.5972	-1.45142	0.443784	-3.27056	0.00107336	0.0111397
STARD8	ENSG00000130052.13	438.44	-0.494404	0.151179	-3.27033	0.00107423	0.0111415
EIF1AY	ENSG00000198692.10	41.3948	8.79444	2.69037	3.26886	0.00107981	0.0111849
ANP32E	ENSG00000143401.15	227.705	-0.60529	0.185258	-3.26729	0.00108583	0.0112328
ALDH1B1	ENSG00000137124.8	106.711	-0.883003	0.270308	-3.26665	0.00108827	0.0112424
PGA3	ENSG00000229859.10	9.17987	4.7842	1.4646	3.26655	0.00108865	0.0112424
IDH1	ENSG00000138413.13	4773.3	-0.52629	0.161118	-3.2665	0.00108886	0.0112424
ADAMDEC1	ENSG00000134028.14	1402.78	-0.763932	0.233942	-3.26548	0.00109279	0.0112758
NDRG1	ENSG00000104419.15	1035.1	-0.604602	0.185192	-3.26473	0.00109567	0.0112982
RPL36	ENSG00000130255.13	885.217	0.318117	0.0974877	3.26315	0.00110181	0.0113543
MVB12B	ENSG00000196814.15	148.068	0.636007	0.195026	3.26114	0.00110966	0.0114279
P2RY2	ENSG00000175591.11	57.8215	0.999318	0.306509	3.26032	0.00111288	0.0114537
RBM18	ENSG00000119446.14	215.079	-0.474998	0.145755	-3.25888	0.00111855	0.0115038
CDKN1A	ENSG00000124762.13	1141.34	-0.656286	0.201394	-3.25871	0.00111918	0.0115038
ANKDD1A	ENSG00000166839.17	27.5091	-1.45441	0.446345	-3.2585	0.00112004	0.0115047
PLXDC2	ENSG00000120594.17	2778.57	-0.30869	0.0947418	-3.25822	0.00112112	0.0115047
SGTB	ENSG00000197860.10	2125.03	-0.26488	0.0812976	-3.25815	0.00112142	0.0115047
LRPAP1	ENSG00000163956.13	4857.66	0.38709	0.118825	3.25766	0.00112334	0.0115078
ZNF706	ENSG00000120963.12	214.855	-0.611868	0.187825	-3.25765	0.00112339	0.0115078
CENPF	ENSG00000117724.13	468.365	-1.36931	0.420351	-3.25753	0.00112386	0.0115078
NIPA2	ENSG00000140157.14	586.534	-0.412069	0.126528	-3.25675	0.00112696	0.0115175
MRPL34	ENSG00000130312.6	281.786	0.647448	0.198805	3.2567	0.00112714	0.0115175
EIF2S2	ENSG00000125977.7	833.462	-0.2795	0.0858265	-3.25657	0.00112768	0.0115175
KPNA3	ENSG00000102753.10	242.127	-0.462641	0.142073	-3.25635	0.00112855	0.0115191
KIAA0100	ENSG00000007202.15	4303.19	-0.258297	0.0793364	-3.25572	0.00113105	0.0115251
NBPF12	ENSG00000268043.7	439.701	0.389518	0.119642	3.2557	0.00113112	0.0115251
PAIP2B	ENSG00000124374.9	34.3518	1.06935	0.32846	3.25566	0.00113129	0.0115251
MROH7	ENSG00000184313.20	105.527	0.986939	0.303196	3.25512	0.00113344	0.0115316
RPL41	ENSG00000229117.9	3221.89	0.272171	0.0836146	3.25506	0.00113368	0.0115316
CD300E	ENSG00000186407.7	26.4589	-1.46689	0.450679	-3.25483	0.00113459	0.0115316
ITGB2	ENSG00000160255.18	10477.5	-0.33318	0.10237	-3.25467	0.00113523	0.0115316
ACSL3	ENSG00000123983.14	912.525	-0.307753	0.0945592	-3.2546	0.00113551	0.0115316
CTTN	ENSG00000085733.16	355.308	-0.908702	0.279364	-3.25276	0.00114291	0.0115994
ARPC2	ENSG00000163466.16	4005.95	-0.305882	0.094058	-3.25206	0.00114572	0.0116132
ZNF548	ENSG00000188785.12	211.553	0.461292	0.141846	3.25206	0.00114572	0.0116132
SLC30A1	ENSG00000170385.10	689.738	-0.372192	0.114463	-3.25165	0.00114737	0.0116226
TMED2	ENSG00000086598.11	1188.17	-0.292585	0.0900094	-3.25061	0.00115158	0.0116579
XPR1	ENSG00000143324.14	330.241	-0.489252	0.150535	-3.25008	0.00115373	0.011665
ATP11C	ENSG00000101974.14	305.045	-0.483945	0.148906	-3.25001	0.00115402	0.011665
ZDHHC20	ENSG00000180776.15	795.979	-0.289897	0.0892018	-3.2499	0.00115445	0.011665
RMDN2	ENSG00000115841.20	44.118	-1.28172	0.39461	-3.24807	0.00116189	0.0117327
EME1	ENSG00000154920.14	20.7529	-1.45837	0.449088	-3.24741	0.00116461	0.0117477
MFSD14A	ENSG00000156875.14	573.489	-0.380907	0.117302	-3.24723	0.00116533	0.0117477
KIAA0586	ENSG00000100578.17	245.421	-0.48676	0.149903	-3.24717	0.00116557	0.0117477
ATP6V1B2	ENSG00000147416.11	7133.11	-0.244824	0.0754002	-3.247	0.00116629	0.0117477
STAT5B	ENSG00000173757.10	1026.3	0.320989	0.0989014	3.24555	0.00117226	0.011793
RNF213	ENSG00000173821.19	11429.2	-0.654358	0.201798	-3.24264	0.00118426	0.0119063
IL7R	ENSG00000168685.15	1511.15	0.631617	0.194817	3.24211	0.0011865	0.0119214
TXN	ENSG00000136810.13	1483.01	-0.502073	0.154883	-3.24162	0.00118853	0.0119343
RAC1	ENSG00000136238.18	1720.55	0.278535	0.0859391	3.24108	0.00119078	0.0119494
EXOC3	ENSG00000180104.16	602.663	0.320383	0.0988763	3.24024	0.00119428	0.0119696
WDR83OS	ENSG00000105583.11	370.551	0.389265	0.120144	3.23999	0.00119532	0.0119724
CHD9	ENSG00000177200.17	1022.13	-0.383765	0.118456	-3.23973	0.00119644	0.0119724
LPIN3	ENSG00000132793.11	63.818	0.975713	0.301179	3.23964	0.00119679	0.0119724
POLR1A	ENSG00000068654.16	512.586	-0.368704	0.113818	-3.23942	0.00119771	0.0119741
BLOC1S6	ENSG00000104164.11	716.553	-0.286339	0.0884072	-3.23886	0.00120007	0.0119903
P2RY1	ENSG00000169860.7	228.911	0.952342	0.294222	3.23682	0.0012087	0.012069
FAM102A	ENSG00000167106.12	187.892	0.611586	0.188991	3.23607	0.00121189	0.0120933
NCF2	ENSG00000116701.14	5039.37	-0.270654	0.083642	-3.23586	0.00121276	0.0120945
CDCA3	ENSG00000111665.11	39.6571	-1.54669	0.478029	-3.23556	0.00121402	0.0120996
SNX6	ENSG00000129515.20	1523.95	-0.34224	0.105808	-3.23455	0.00121835	0.0121296
FLVCR2	ENSG00000119686.10	215.079	-0.884598	0.273488	-3.2345	0.00121855	0.0121296
MSANTD3	ENSG00000066697.14	222.645	-0.548633	0.169639	-3.23412	0.00122018	0.0121384
ABAT	ENSG00000183044.12	120.118	0.60278	0.186481	3.23239	0.00122759	0.0122046
BUB1B	ENSG00000156970.12	127.01	-1.1737	0.363239	-3.2312	0.00123273	0.0122481
CYB561	ENSG00000008283.16	159.029	-0.878071	0.271786	-3.23074	0.00123471	0.0122601
POR	ENSG00000127948.16	1803.68	0.443963	0.137462	3.22972	0.00123913	0.0122965
BRCC3	ENSG00000185515.14	227.545	-0.550396	0.170441	-3.22924	0.00124121	0.0123095
EFCAB2	ENSG00000203666.12	19.0613	-1.5468	0.479085	-3.22864	0.00124378	0.0123274
EZH2	ENSG00000106462.11	97.5258	-0.75286	0.233222	-3.22808	0.00124622	0.012344
CD83	ENSG00000112149.10	1361.67	-0.560235	0.173654	-3.22615	0.00125469	0.0124167
CSF2RA	ENSG00000198223.16	509.431	0.51236	0.15882	3.22605	0.00125511	0.0124167
TIPARP	ENSG00000163659.13	610.49	0.365963	0.113452	3.22571	0.00125659	0.0124237
SNX18	ENSG00000178996.14	1067.69	0.336395	0.104296	3.22539	0.001258	0.01243
RPL10	ENSG00000147403.16	6062.93	0.307452	0.0953305	3.22512	0.00125922	0.0124344
ANKH	ENSG00000154122.14	676.573	0.724326	0.224648	3.22427	0.00126296	0.0124637
TMPO	ENSG00000120802.13	711.891	-0.407395	0.126414	-3.22271	0.00126986	0.012524
INTS4	ENSG00000149262.17	389.835	0.425476	0.132047	3.22217	0.00127224	0.0125295
XCL1	ENSG00000143184.5	7.90605	-5.00038	1.55189	-3.22211	0.0012725	0.0125295
B3GNT5	ENSG00000176597.12	122.423	-0.626146	0.194342	-3.22188	0.00127353	0.0125295
RPS5	ENSG00000083845.9	1707.55	0.302308	0.0938681	3.22057	0.00127938	0.0125794
CDCA5	ENSG00000146670.10	75.3905	-1.36002	0.422488	-3.21906	0.0012861	0.0126377
ETF1	ENSG00000120705.13	1377.3	-0.280197	0.0870524	-3.21871	0.00128766	0.0126454
SPC24	ENSG00000161888.11	60.094	-1.18689	0.368775	-3.21847	0.00128875	0.0126483
BRCA2	ENSG00000139618.15	205.286	-0.661298	0.2056	-3.21644	0.00129794	0.0127307
OARD1	ENSG00000124596.17	144.446	0.585219	0.182042	3.21474	0.00130562	0.0127983
ETNK1	ENSG00000139163.16	1277.01	-0.289474	0.0900834	-3.2134	0.00131174	0.0128504
KITLG	ENSG00000049130.16	409.572	0.702776	0.218723	3.21309	0.00131316	0.0128565
FBXL5	ENSG00000118564.15	1011.69	-0.359143	0.11179	-3.21266	0.00131514	0.012868
FBRSL1	ENSG00000112787.13	104.803	0.622868	0.193966	3.21123	0.00132168	0.0129242
RPS23	ENSG00000186468.13	2921.58	0.247128	0.0769728	3.21059	0.00132464	0.0129452
TANGO2	ENSG00000183597.16	1053.48	0.288949	0.0900086	3.21023	0.00132627	0.0129454
LY96	ENSG00000154589.7	346.602	-0.451298	0.140596	-3.20989	0.00132788	0.0129532
PSMB3	ENSG00000277791.5	744.346	-0.351449	0.10951	-3.20928	0.00133066	0.0129725
C8orf76	ENSG00000189376.12	175.47	-0.545852	0.170326	-3.20474	0.00135185	0.0131711
BBS5	ENSG00000163093.12	195.832	0.983298	0.306892	3.20405	0.0013551	0.0131868
GTF2F2	ENSG00000188342.12	243.312	-0.481416	0.150394	-3.20104	0.00136934	0.0133173
HLA-DPA1	ENSG00000231389.7	6926.32	-0.672386	0.210099	-3.20033	0.00137272	0.0133332
RAB18	ENSG00000099246.16	562.867	-0.331126	0.103468	-3.20028	0.00137293	0.0133332
SGCE	ENSG00000127990.19	3.6673	5.292	1.65366	3.20017	0.00137346	0.0133332
IGSF3	ENSG00000143061.17	24.7452	1.39054	0.434953	3.19698	0.00138874	0.0134653
DEXI	ENSG00000182108.11	735.751	0.418391	0.130922	3.19572	0.00139482	0.013516
DDX59	ENSG00000118197.14	157.594	0.544399	0.17041	3.19465	0.00140002	0.0135582
CCDC17	ENSG00000159588.15	21.7232	1.41145	0.442058	3.1929	0.00140852	0.0136324
NDC1	ENSG00000058804.12	185.121	-0.5729	0.179492	-3.19178	0.00141397	0.0136664
PGGHG	ENSG00000142102.16	464.801	0.520844	0.163189	3.19166	0.00141459	0.0136664
MANSC4	ENSG00000205693.3	10.2094	2.61838	0.820621	3.19074	0.0014191	0.0137018
H1-10	ENSG00000184897.6	301.899	0.545327	0.170931	3.19034	0.00142105	0.0137124
KLHL36	ENSG00000135686.13	1222.77	0.311622	0.0977238	3.1888	0.00142863	0.0137772
LRRC40	ENSG00000066557.6	108.922	-0.613805	0.192558	-3.18764	0.00143439	0.0138218
GARS1	ENSG00000106105.14	1109.69	-0.359088	0.112654	-3.18752	0.00143498	0.0138218
KTN1	ENSG00000126777.18	1924.79	-0.257654	0.0808554	-3.18659	0.00143958	0.0138579
SLC18B1	ENSG00000146409.12	833.042	0.577315	0.181218	3.18575	0.0014438	0.0138902
RPS6KA3	ENSG00000177189.14	797.831	-0.440904	0.138429	-3.18506	0.00144724	0.0139143
ERBIN	ENSG00000112851.14	1935	-0.263269	0.0826617	-3.1849	0.00144803	0.0139143
ZBTB1	ENSG00000126804.13	618.369	-0.331112	0.103985	-3.18423	0.00145141	0.0139383
CXCL12	ENSG00000107562.16	12.3028	1.95161	0.613027	3.18356	0.00145474	0.013962
ANAPC16	ENSG00000166295.9	541.273	0.31601	0.0994413	3.17786	0.00148367	0.0142281
ITPR3	ENSG00000096433.11	167.762	0.84397	0.265681	3.17663	0.00148998	0.0142745
RAB10	ENSG00000084733.11	1990.62	-0.222402	0.0700156	-3.17646	0.00149084	0.0142745
RBM15B	ENSG00000259956.2	733.68	0.312327	0.0983537	3.17555	0.00149553	0.0143108
RLF	ENSG00000117000.9	449.755	-0.429561	0.135305	-3.17477	0.00149957	0.0143409
UEVLD	ENSG00000151116.17	335.448	-0.417265	0.131472	-3.1738	0.00150458	0.0143803
CLEC4E	ENSG00000166523.8	62.2929	-1.33858	0.422057	-3.17155	0.00151626	0.0144747
DAB2	ENSG00000153071.15	5489.32	0.241266	0.076086	3.17096	0.00151936	0.0144957
LPP	ENSG00000145012.13	833.635	-0.354563	0.111841	-3.17024	0.00152312	0.0145201
PRKAG2	ENSG00000106617.14	202.596	-0.569611	0.179681	-3.17013	0.00152373	0.0145201
NUGGC	ENSG00000189233.12	8.24236	2.8398	0.895935	3.16965	0.00152622	0.0145352
RRM2	ENSG00000171848.15	230.755	-1.6959	0.535263	-3.16836	0.00153302	0.0145914
OPTN	ENSG00000123240.17	838.227	-0.654565	0.206611	-3.16811	0.00153435	0.0145918
B4GALT5	ENSG00000158470.5	1385.53	-0.438676	0.138495	-3.16745	0.00153781	0.014611
CRY2	ENSG00000121671.12	266.271	0.41719	0.131724	3.16714	0.00153944	0.0146118
FAM13A	ENSG00000138640.15	318.957	0.503737	0.15906	3.16697	0.00154037	0.0146118
PTTG1	ENSG00000164611.13	90.3949	-1.02263	0.32291	-3.16692	0.00154062	0.0146118
LFNG	ENSG00000106003.13	469.811	0.362193	0.114443	3.16483	0.00155174	0.0147086
RTN1	ENSG00000139970.17	76.2622	-1.05695	0.334013	-3.1644	0.00155405	0.0147219
GFOD1	ENSG00000145990.11	305.522	-0.799783	0.252914	-3.16227	0.00156543	0.0148141
MLKL	ENSG00000168404.13	419.765	-0.501481	0.158584	-3.16223	0.00156564	0.0148141
HGF	ENSG00000019991.18	336.494	0.647906	0.205015	3.16029	0.00157611	0.0149044
KLHL13	ENSG00000003096.14	134.007	1.08918	0.344994	3.15709	0.00159354	0.0150604
ENG	ENSG00000106991.13	718.777	0.732431	0.232118	3.15542	0.00160268	0.0151379
LRP3	ENSG00000130881.14	263.005	0.516521	0.163868	3.15205	0.00162126	0.0152954
RBPJ	ENSG00000168214.20	772.868	-0.432269	0.137218	-3.15022	0.00163147	0.0153827
HLA-DRA	ENSG00000204287.14	19104.5	-0.668592	0.212327	-3.14888	0.00163896	0.0154442
PALLD	ENSG00000129116.19	29.3842	-1.53288	0.48685	-3.14857	0.00164071	0.0154517
RHEB	ENSG00000106615.10	642.29	-0.389047	0.123571	-3.14837	0.00164185	0.0154534
R3HDM2	ENSG00000179912.20	230.493	0.452611	0.143795	3.14763	0.00164602	0.0154836
CDK18	ENSG00000117266.15	66.842	-1.15428	0.366953	-3.14558	0.00165759	0.0155832
SLC43A2	ENSG00000167703.14	765.571	0.533186	0.169601	3.14377	0.00166787	0.0156708
PRDM2	ENSG00000116731.22	303.926	0.426875	0.135812	3.14314	0.00167145	0.0156952
PIK3AP1	ENSG00000155629.15	5384.77	-0.320411	0.101955	-3.14268	0.0016741	0.015704
BRAT1	ENSG00000106009.16	385.946	0.375156	0.119378	3.14259	0.0016746	0.015704
ATL1	ENSG00000198513.12	22.8389	-1.28034	0.407431	-3.14247	0.00167531	0.015704
TLE5	ENSG00000104964.14	1166.19	-0.395388	0.125829	-3.14225	0.00167652	0.0157062
PAPSS1	ENSG00000138801.9	1277.85	-0.388925	0.123805	-3.14142	0.0016813	0.0157418
VAMP5	ENSG00000168899.5	37.9179	-2.1459	0.68353	-3.13943	0.00169274	0.0158304
MYL6	ENSG00000092841.18	6307.78	-0.330451	0.105346	-3.13682	0.00170789	0.0159591
AOAH	ENSG00000136250.12	1104.28	0.548595	0.174894	3.13672	0.00170848	0.0159591
SLC16A5	ENSG00000170190.16	163.307	0.499206	0.159203	3.13566	0.00171466	0.0160075
EVC2	ENSG00000173040.13	31.5099	1.2981	0.414047	3.13516	0.00171763	0.0160259
MAN2A1	ENSG00000112893.9	1203.79	-0.288032	0.0918989	-3.13423	0.00172306	0.0160622
ARHGEF19	ENSG00000142632.17	20.4233	1.38253	0.441119	3.13415	0.00172351	0.0160622
TAOK1	ENSG00000160551.11	1507.59	-0.264034	0.0842529	-3.13382	0.00172545	0.0160686
ACAD11	ENSG00000240303.8	166.72	-0.667478	0.213	-3.13369	0.0017262	0.0160686
RASAL1	ENSG00000111344.11	153.506	1.11154	0.354749	3.13331	0.00172848	0.0160804
FRK	ENSG00000111816.8	17.4267	2.01335	0.642696	3.13266	0.00173229	0.0161065
POLR3G	ENSG00000113356.12	8.22315	-2.35531	0.751904	-3.13246	0.00173348	0.0161075
TDG	ENSG00000139372.15	291.502	-0.407584	0.130123	-3.13231	0.00173439	0.0161075
CXCL11	ENSG00000169248.13	51.0222	-3.57761	1.14234	-3.13182	0.00173727	0.0161249
SLC25A20	ENSG00000178537.10	426.574	0.709636	0.22663	3.13125	0.00174066	0.016147
EPHA4	ENSG00000116106.12	54.0978	1.37168	0.438254	3.12988	0.0017488	0.0162133
CUEDC1	ENSG00000180891.13	536.418	0.388471	0.124174	3.12844	0.00175737	0.0162675
MRPL37	ENSG00000116221.15	375.781	-0.548873	0.175462	-3.12816	0.00175903	0.0162675
TSNARE1	ENSG00000171045.16	131.321	0.701209	0.224164	3.12811	0.00175934	0.0162675
CYB5B	ENSG00000103018.17	572.613	-0.345537	0.110464	-3.12805	0.00175971	0.0162675
HYI	ENSG00000178922.16	78.8744	0.71313	0.228085	3.1266	0.00176842	0.0163325
SLC35F6	ENSG00000213699.9	1795.71	0.228115	0.072961	3.12654	0.00176878	0.0163325
TGFBR2	ENSG00000163513.19	1912.95	0.241925	0.0773999	3.12565	0.00177415	0.0163727
MCM10	ENSG00000065328.16	36.3781	-1.27995	0.40965	-3.1245	0.00178107	0.0164271
GOLT1B	ENSG00000111711.10	170.79	-0.486678	0.155852	-3.12268	0.00179211	0.0165194
CIZ1	ENSG00000148337.21	466.939	0.355903	0.113996	3.12205	0.00179594	0.0165453
AFTPH	ENSG00000119844.15	651.016	-0.329835	0.105705	-3.12034	0.00180643	0.0166245
CYSTM1	ENSG00000120306.11	524.164	-0.416553	0.133497	-3.12031	0.00180661	0.0166245
ERMP1	ENSG00000099219.14	508.442	-0.718181	0.230191	-3.11993	0.00180893	0.0166364
ACSS2	ENSG00000131069.20	945.016	-0.348073	0.111628	-3.11814	0.00181995	0.0167282
TRAF2	ENSG00000127191.18	135.95	-0.724321	0.232332	-3.11761	0.00182322	0.0167486
RAB5IF	ENSG00000101084.18	1106.03	-0.370929	0.119021	-3.1165	0.00183012	0.0167928
KLF13	ENSG00000169926.11	1952.66	0.27757	0.0890893	3.11564	0.00183547	0.0168239
TRABD2A	ENSG00000186854.11	120.313	0.60719	0.194886	3.11562	0.0018356	0.0168239
LEO1	ENSG00000166477.13	302.395	-0.403682	0.1296	-3.11483	0.00184051	0.0168496
PDCD10	ENSG00000114209.15	383.09	-0.34705	0.111471	-3.11335	0.00184975	0.0169178
PNOC	ENSG00000168081.9	5.41974	3.91371	1.25709	3.1133	0.00185006	0.0169178
OXR1	ENSG00000164830.18	396.783	-0.547961	0.176033	-3.11283	0.00185305	0.0169355
GLA	ENSG00000102393.11	1750.48	-0.350271	0.112569	-3.11161	0.00186067	0.0169956
GON4L	ENSG00000116580.18	708.224	0.340807	0.109551	3.11095	0.00186488	0.0170163
CLEC2B	ENSG00000110852.4	176.277	-0.657474	0.211344	-3.11092	0.00186506	0.0170163
YY1	ENSG00000100811.14	769.782	0.26654	0.0857023	3.11007	0.00187042	0.0170555
GNAI3	ENSG00000065135.12	1216.61	-0.247392	0.0795511	-3.10985	0.00187183	0.0170587
CD160	ENSG00000117281.16	8.34901	-2.92695	0.941258	-3.10961	0.00187335	0.0170629
TMEM97	ENSG00000109084.14	60.0733	-0.810093	0.260695	-3.10744	0.00188716	0.0171789
SLC30A7	ENSG00000162695.12	543.033	-0.328374	0.105717	-3.10615	0.0018954	0.0172441
SMC3	ENSG00000108055.9	534.226	-0.327569	0.105497	-3.10501	0.00190275	0.0173013
USP49	ENSG00000164663.14	88.1793	-0.772167	0.248892	-3.10241	0.00191951	0.0174339
EMB	ENSG00000170571.12	494.362	0.424431	0.136817	3.10217	0.00192107	0.0174382
USP1	ENSG00000162607.13	266.437	-0.473149	0.152599	-3.1006	0.00193128	0.017521
ZNF592	ENSG00000166716.10	521.669	0.337088	0.108791	3.0985	0.00194502	0.0176357
CEMIP2	ENSG00000135048.14	1031.84	-0.605293	0.195411	-3.09755	0.00195131	0.0176828
CD74	ENSG00000019582.15	21771	-0.633469	0.20458	-3.09643	0.00195865	0.0177339
UBE2Z	ENSG00000159202.18	871.86	-0.408594	0.13196	-3.09636	0.00195916	0.0177339
SDC4	ENSG00000124145.6	500.976	-0.728449	0.235341	-3.09529	0.00196622	0.0177764
FAM13B	ENSG00000031003.10	549.808	-0.427729	0.138199	-3.09501	0.00196807	0.0177764
PARS2	ENSG00000162396.6	80.43	0.782766	0.25292	3.09491	0.00196873	0.0177764
ZNF714	ENSG00000160352.16	152.34	-0.597173	0.192963	-3.09475	0.00196976	0.0177764
UBTF	ENSG00000108312.15	745.013	0.288619	0.0932633	3.09467	0.0019703	0.0177764
TSTD3	ENSG00000279170.2	24.6874	1.19657	0.386657	3.09464	0.00197049	0.0177764
ARHGAP6	ENSG00000047648.23	51.6876	0.857322	0.277102	3.09389	0.00197551	0.0178117
EIF4G3	ENSG00000075151.20	886.512	0.327186	0.105768	3.09344	0.00197854	0.017829
GCSAML	ENSG00000169224.13	6.21749	-2.65847	0.859741	-3.09217	0.00198698	0.0178919
PDE7A	ENSG00000205268.10	569.74	0.40577	0.13123	3.09206	0.00198774	0.0178919
GABBR1	ENSG00000204681.11	49.0845	1.04408	0.337805	3.09078	0.00199632	0.0179505
CDCP1	ENSG00000163814.8	88.6253	0.972428	0.314626	3.09075	0.00199653	0.0179505
ACTR6	ENSG00000075089.9	83.7704	-0.692636	0.224119	-3.09048	0.00199832	0.0179505
VAV2	ENSG00000160293.17	125.497	0.675208	0.21851	3.09005	0.00200122	0.0179629
FERMT3	ENSG00000149781.12	3098.9	-0.297508	0.0962948	-3.08956	0.00200455	0.0179828
FAM229A	ENSG00000225828.1	44.4173	0.960584	0.310957	3.08913	0.00200747	0.0179989
MTMR3	ENSG00000100330.15	1093.72	0.345173	0.111748	3.08887	0.00200921	0.0180045
ATP5MC3	ENSG00000154518.9	1261.73	-0.38039	0.123178	-3.08814	0.00201416	0.0180388
EIF4G2	ENSG00000110321.17	5375.12	-0.25406	0.0822852	-3.08756	0.0020181	0.0180583
RANGAP1	ENSG00000100401.19	630.424	-0.357133	0.115671	-3.08748	0.00201858	0.0180583
MCCC1	ENSG00000078070.13	319.324	-0.395473	0.128121	-3.08671	0.00202385	0.0180954
GLB1L2	ENSG00000149328.15	5.89705	4.06739	1.31801	3.08602	0.00202856	0.0181274
CAPN1	ENSG00000014216.15	1399.15	-0.285863	0.0926634	-3.08496	0.00203582	0.0181822
GYPC	ENSG00000136732.16	699.256	0.361277	0.117135	3.08427	0.00204053	0.0182141
PLTP	ENSG00000100979.15	95.1123	1.15517	0.37457	3.08398	0.00204249	0.0182179
COL19A1	ENSG00000082293.13	39.0638	1.23385	0.400096	3.08388	0.00204322	0.0182179
PEX6	ENSG00000124587.14	165.072	-0.517469	0.16783	-3.08329	0.00204725	0.0182436
PGAP3	ENSG00000161395.14	319.499	0.432852	0.140474	3.08136	0.00206059	0.0183524
TTC37	ENSG00000198677.11	1675.44	-0.274116	0.088995	-3.08012	0.00206914	0.018417
DNASE2	ENSG00000105612.9	2904.67	0.443787	0.144089	3.07995	0.00207036	0.018417
NFKB2	ENSG00000077150.20	394.32	-0.613623	0.19924	-3.07982	0.00207128	0.018417
ARPC1B	ENSG00000130429.15	5191.38	-0.264808	0.0860872	-3.07605	0.00209766	0.0186412
DAPK1	ENSG00000196730.13	3455.93	0.363577	0.118242	3.07485	0.0021061	0.0187059
COMMD8	ENSG00000169019.11	131.63	-0.58327	0.18971	-3.07454	0.00210825	0.0187118
CBX6	ENSG00000183741.12	780.338	-0.569724	0.185311	-3.07442	0.0021091	0.0187118
ENTR1	ENSG00000165689.17	480.571	0.564205	0.183713	3.07113	0.00213253	0.018897
SLC25A48	ENSG00000145832.14	5.36024	-2.97695	0.969379	-3.07099	0.0021335	0.018897
SLC16A3	ENSG00000141526.16	1794.59	-0.400877	0.130559	-3.07048	0.00213717	0.0189192
ZNF586	ENSG00000083828.16	174.818	0.484839	0.157944	3.06969	0.00214284	0.0189551
EIF2S1	ENSG00000134001.14	683.442	-0.417782	0.136104	-3.06958	0.00214359	0.0189551
TIGAR	ENSG00000078237.7	407.092	-0.618041	0.20142	-3.06841	0.00215198	0.0190084
NUF2	ENSG00000143228.13	26.9305	-1.39504	0.45486	-3.06696	0.0021625	0.0190908
ANKRD29	ENSG00000154065.17	30.4155	-1.59096	0.518901	-3.06602	0.00216926	0.0191399
IL2RG	ENSG00000147168.12	250.478	-0.604169	0.197157	-3.0644	0.00218106	0.0192335
PNISR	ENSG00000132424.16	1134.35	0.357806	0.116772	3.06414	0.00218299	0.01924
WDFY1	ENSG00000085449.15	1113.93	-0.329078	0.107413	-3.06367	0.00218643	0.0192511
AHNAK2	ENSG00000185567.7	152.807	-0.76274	0.248965	-3.06364	0.00218664	0.0192511
ZNF646	ENSG00000167395.10	552.115	0.335687	0.109582	3.06333	0.00218885	0.01926
ADAM12	ENSG00000148848.14	10.0607	-1.91689	0.626097	-3.06165	0.00220121	0.0193476
NUDT16L1	ENSG00000168101.14	146.126	0.501246	0.163739	3.06126	0.0022041	0.0193624
RPAP3	ENSG00000005175.10	168.386	-0.632183	0.206546	-3.06073	0.00220795	0.0193856
COL24A1	ENSG00000171502.15	34.9919	1.31105	0.42846	3.05991	0.00221405	0.0194286
AC119396.1	ENSG00000263264.2	106.19	0.724392	0.236774	3.05943	0.00221761	0.0194491
NBPF19	ENSG00000271383.7	1091	0.395659	0.129333	3.05924	0.00221902	0.0194509
ALOX5	ENSG00000012779.11	266.603	0.965358	0.31559	3.0589	0.00222148	0.0194619
C9orf16	ENSG00000171159.5	336.296	-0.619427	0.202586	-3.0576	0.00223118	0.0195265
MAP2K2	ENSG00000126934.13	766.401	0.405696	0.132685	3.05758	0.00223129	0.0195265
CRTAP	ENSG00000170275.15	1700.87	0.272449	0.0891316	3.0567	0.00223787	0.0195735
ANKZF1	ENSG00000163516.14	405.087	0.420042	0.137437	3.05625	0.00224124	0.0195923
EEF2	ENSG00000167658.16	10116.5	0.242828	0.0794615	3.05591	0.00224376	0.0196036
UBE2C	ENSG00000175063.17	60.3925	-1.25462	0.411006	-3.05255	0.00226905	0.0198041
H1-5	ENSG00000184357.4	319.734	-0.995242	0.326038	-3.05254	0.00226917	0.0198041
ARPC5L	ENSG00000136950.13	142.659	-0.492751	0.161465	-3.05174	0.00227517	0.0198457
AMPD3	ENSG00000133805.15	1012.08	0.363609	0.119164	3.05134	0.0022782	0.0198614
CROCC	ENSG00000058453.17	180.041	0.50255	0.164734	3.05067	0.0022833	0.0198951
BACH2	ENSG00000112182.15	126.535	0.790499	0.25919	3.04988	0.0022893	0.0199311
VWDE	ENSG00000146530.14	9.6592	2.51537	0.824765	3.0498	0.00228992	0.0199311
MTF1	ENSG00000188786.10	298.342	-0.505644	0.165883	-3.0482	0.00230217	0.0200269
AC015813.2	ENSG00000266086.3	32.7965	1.2593	0.413485	3.04558	0.00232232	0.0201913
PPM1G	ENSG00000115241.11	636.897	-0.309998	0.101799	-3.04521	0.00232521	0.0202054
FABP4	ENSG00000170323.9	230.318	-2.69573	0.885481	-3.04437	0.00233171	0.020251
KAT8	ENSG00000103510.20	359.01	0.387255	0.12722	3.04397	0.00233479	0.020263
RTL6	ENSG00000188636.4	294.809	0.486099	0.159713	3.04358	0.00233783	0.020263
JAK2	ENSG00000096968.13	523.575	-0.529535	0.173992	-3.04345	0.00233882	0.020263
CCR4	ENSG00000183813.7	84.1806	1.22176	0.401445	3.04341	0.00233914	0.020263
MT-ATP6	ENSG00000198899.2	493.659	0.50406	0.165625	3.04338	0.0023394	0.020263
MRPS6	ENSG00000243927.6	315.461	-0.438732	0.144297	-3.04048	0.00236205	0.0204385
TMEM114	ENSG00000232258.6	7.77982	-3.13839	1.03222	-3.04041	0.00236254	0.0204385
ANKMY1	ENSG00000144504.15	128.416	0.545569	0.179454	3.04016	0.00236454	0.0204385
RNPEPL1	ENSG00000142327.13	751.769	0.404607	0.133093	3.04003	0.00236557	0.0204385
AZU1	ENSG00000172232.10	44.0721	1.03814	0.341496	3.03997	0.00236602	0.0204385
MRPL1	ENSG00000169288.18	81.3547	-0.753632	0.248056	-3.03816	0.0023803	0.0205398
AURKB	ENSG00000178999.13	44.8822	-1.3678	0.450438	-3.03661	0.00239258	0.0206064
TNS3	ENSG00000136205.17	5795.38	-0.463832	0.152756	-3.03642	0.00239402	0.0206064
ETFDH	ENSG00000171503.12	320.847	0.356651	0.117458	3.03641	0.00239413	0.0206064
TMEM104	ENSG00000109066.14	390.532	-0.499494	0.164503	-3.03637	0.00239443	0.0206064
DTL	ENSG00000143476.18	56.0654	-1.17983	0.389181	-3.03158	0.00243276	0.0209027
DAZAP2	ENSG00000183283.16	2827.75	0.2166	0.0714559	3.03124	0.00243548	0.0209149
MINPP1	ENSG00000107789.16	95.6233	-0.614732	0.202888	-3.02991	0.00244628	0.0209901
KNTC1	ENSG00000184445.12	325.721	-0.545806	0.180144	-3.02984	0.00244685	0.0209901
FAM111A	ENSG00000166801.15	900.794	-0.410055	0.135348	-3.02964	0.00244842	0.0209924
CTNNBIP1	ENSG00000178585.15	268.463	0.422857	0.139585	3.02939	0.00245049	0.020999
TRIM65	ENSG00000141569.12	604.405	0.325921	0.107644	3.02777	0.00246362	0.0211002
PSME1	ENSG00000092010.15	1058.48	-0.704881	0.232832	-3.02742	0.00246651	0.0211138
MAD2L1	ENSG00000164109.14	52.4605	-1.17741	0.389005	-3.02671	0.00247233	0.0211523
PACS2	ENSG00000179364.13	936.613	0.301181	0.0995289	3.02607	0.00247759	0.0211725
ITGBL1	ENSG00000198542.14	5.58961	-3.9872	1.31762	-3.02605	0.0024777	0.0211725
TDP2	ENSG00000111802.14	1737.96	0.452399	0.149507	3.02594	0.00247864	0.0211725
MVK	ENSG00000110921.14	230.854	-0.568355	0.187949	-3.02399	0.00249468	0.0212776
INPP5D	ENSG00000168918.14	1320.71	0.283763	0.0938404	3.02389	0.00249544	0.0212776
C15orf48	ENSG00000166920.12	243.328	-0.811322	0.268312	-3.0238	0.00249624	0.0212776
ATP1B1	ENSG00000143153.13	785.799	-0.484342	0.160233	-3.02273	0.00250507	0.0213278
EZH1	ENSG00000108799.13	649.248	0.346996	0.114805	3.02247	0.00250718	0.0213278
WIZ	ENSG00000011451.20	142.737	0.537979	0.177997	3.0224	0.00250782	0.0213278
SURF4	ENSG00000148248.14	1681.24	-0.25992	0.0859982	-3.02239	0.00250788	0.0213278
RANBP2	ENSG00000153201.16	3550.74	-0.2695	0.0891757	-3.02212	0.00251008	0.0213278
BCL11B	ENSG00000127152.18	255.582	0.572248	0.189373	3.02181	0.00251271	0.0213388
SSX2IP	ENSG00000117155.16	74.1568	-0.748464	0.247734	-3.02124	0.00251744	0.0213676
ZFYVE16	ENSG00000039319.17	2252.6	-0.376146	0.124604	-3.01873	0.0025384	0.0215342
QKI	ENSG00000112531.17	2646.37	0.334599	0.110864	3.01811	0.00254355	0.0215665
HLA-DOA	ENSG00000204252.14	233.832	-2.00097	0.663441	-3.01605	0.00256089	0.0216804
MAN2C1	ENSG00000140400.17	971.585	0.271287	0.0899483	3.01604	0.00256102	0.0216804
EEF1D	ENSG00000104529.17	1714.45	0.276123	0.0915984	3.01449	0.0025741	0.0217796
PPARGC1A	ENSG00000109819.9	10.2158	2.59146	0.859713	3.01433	0.00257548	0.0217798
AKR1C3	ENSG00000196139.14	24.5345	1.18848	0.394389	3.01348	0.00258274	0.0218297
KIF2A	ENSG00000068796.17	249.959	-0.454647	0.150991	-3.01109	0.00260308	0.0219901
ELP2	ENSG00000134759.14	471.831	0.369503	0.122771	3.0097	0.00261503	0.0220794
TMEM119	ENSG00000183160.9	17.6141	2.07943	0.691523	3.00703	0.00263811	0.0222626
TSR1	ENSG00000167721.11	333.885	-0.410987	0.136711	-3.00624	0.002645	0.0223091
FAM117A	ENSG00000121104.8	99.9497	0.7997	0.266336	3.0026	0.00267688	0.0225661
CISH	ENSG00000114737.15	188.552	-1.18119	0.393572	-3.00121	0.00268908	0.0226243
SERPINI1	ENSG00000163536.12	19.8336	-1.43475	0.478059	-3.00121	0.00268908	0.0226243
E2F1	ENSG00000101412.13	47.856	-1.36552	0.454995	-3.00117	0.00268944	0.0226243
NDUFB6	ENSG00000165264.11	129.687	-0.59292	0.197581	-3.00089	0.00269188	0.0226243
TSC22D1	ENSG00000102804.15	283.827	-0.500948	0.166937	-3.00081	0.0026926	0.0226243
MYCL	ENSG00000116990.11	46.098	-1.01652	0.338758	-3.00072	0.0026934	0.0226243
RPL8	ENSG00000161016.17	2957.11	0.23879	0.0795784	3.0007	0.00269364	0.0226243
ZBTB34	ENSG00000177125.5	396.662	0.340765	0.113613	2.99935	0.00270553	0.0227123
DOCK7	ENSG00000116641.18	801.509	-0.377378	0.125899	-2.99746	0.00272243	0.0228237
AGL	ENSG00000162688.17	386.377	-0.358546	0.11962	-2.99739	0.00272306	0.0228237
PCTP	ENSG00000141179.14	277.333	-0.409727	0.136838	-2.99425	0.00275121	0.0230477
HEBP1	ENSG00000013583.10	472.704	0.506721	0.169326	2.99258	0.0027663	0.023162
STK40	ENSG00000196182.10	1297.11	0.324114	0.108323	2.99211	0.00277052	0.0231853
HJURP	ENSG00000123485.12	64.8269	-1.21797	0.40713	-2.9916	0.00277517	0.0232121
FANCI	ENSG00000140525.17	157.812	-0.757428	0.253205	-2.99136	0.00277734	0.0232181
ADA2	ENSG00000093072.18	4088.97	0.436141	0.145822	2.99091	0.00278147	0.0232406
LPCAT1	ENSG00000153395.10	1306.08	-0.524861	0.175608	-2.98882	0.00280053	0.0233877
DPYSL3	ENSG00000113657.13	30.8173	-3.82367	1.27946	-2.98851	0.0028034	0.0233995
RPS8	ENSG00000142937.12	3473.04	0.266573	0.0892307	2.98746	0.00281305	0.0234528
GALM	ENSG00000143891.17	1281	-0.344998	0.115483	-2.98743	0.00281335	0.0234528
SOCS1	ENSG00000185338.6	14.4246	-2.51707	0.84258	-2.98734	0.00281417	0.0234528
DERL3	ENSG00000099958.14	10.9754	1.82724	0.611855	2.9864	0.00282287	0.0235132
AC108488.2	ENSG00000286905.1	28.3396	1.16608	0.390584	2.98548	0.00283134	0.0235716
MCUR1	ENSG00000050393.11	191.005	-0.430265	0.144142	-2.98501	0.00283573	0.0235959
RPLP2	ENSG00000177600.9	2087.47	0.288381	0.0966175	2.98477	0.00283792	0.0236018
NAALAD2	ENSG00000077616.11	2.92708	4.98462	1.67014	2.98456	0.00283987	0.0236059
RPS7	ENSG00000171863.15	2465.54	0.362514	0.12148	2.98414	0.00284375	0.0236259
PDE3B	ENSG00000152270.9	468.955	-0.405967	0.136076	-2.98337	0.00285089	0.023673
ABO	ENSG00000175164.15	14.5122	1.72418	0.578109	2.98245	0.00285952	0.0237324
PSMD6	ENSG00000163636.10	488.525	-0.359041	0.120392	-2.98227	0.00286122	0.0237342
PLK4	ENSG00000142731.11	62.0983	-0.965141	0.323678	-2.98179	0.00286564	0.0237586
CNNM2	ENSG00000148842.18	98.9843	0.630885	0.211626	2.98113	0.0028719	0.0237982
BARD1	ENSG00000138376.11	160.758	-0.681127	0.228527	-2.98051	0.00287765	0.023822
NSD3	ENSG00000147548.17	774.152	0.278332	0.0933841	2.98051	0.00287772	0.023822
TAP1	ENSG00000168394.11	1656.07	-1.34326	0.450955	-2.97869	0.00289481	0.0239511
EGFL7	ENSG00000172889.16	95.98	-0.755571	0.253689	-2.97833	0.00289822	0.0239669
TNNT1	ENSG00000105048.17	13.0717	2.36779	0.795072	2.97808	0.00290056	0.0239696
GAB2	ENSG00000033327.13	967.051	0.289082	0.097073	2.97798	0.00290152	0.0239696
BRD1	ENSG00000100425.18	314.968	0.396891	0.133285	2.97775	0.0029037	0.0239753
COL23A1	ENSG00000050767.17	102.134	2.23904	0.75202	2.97736	0.00290739	0.0239934
CAPRIN1	ENSG00000135387.21	2411.01	-0.236193	0.0793366	-2.9771	0.00290986	0.0240015
IDE	ENSG00000119912.17	497.697	-0.339615	0.114134	-2.97557	0.00292444	0.0240884
EIF4EBP2	ENSG00000148730.7	790.693	0.307491	0.10334	2.97552	0.00292489	0.0240884
MARS1	ENSG00000166986.15	1177.86	-0.311839	0.104844	-2.97433	0.00293631	0.02417
OSBPL8	ENSG00000091039.17	1410.12	-0.376764	0.126701	-2.97365	0.00294282	0.0242113
B3GNT7	ENSG00000156966.7	499.795	-0.842015	0.283374	-2.97139	0.00296454	0.0243775
H2AC13	ENSG00000196747.4	178.287	-0.891117	0.299933	-2.97105	0.00296784	0.0243922
KLHL22	ENSG00000099910.17	236.677	0.532721	0.179324	2.97072	0.00297099	0.0244055
ARPC5	ENSG00000162704.16	2858.5	-0.24019	0.0808687	-2.97012	0.00297679	0.0244407
KPNA4	ENSG00000186432.9	987.128	-0.261913	0.0881979	-2.9696	0.00298185	0.0244573
MAN2B2	ENSG00000013288.9	1060.14	0.263162	0.0886516	2.96849	0.00299264	0.0245333
GPR162	ENSG00000250510.8	47.0732	0.919516	0.309826	2.96785	0.00299892	0.0245722
PWP1	ENSG00000136045.12	338.899	-0.37472	0.126282	-2.96734	0.00300388	0.0246003
SULT1A2	ENSG00000197165.11	8.57679	2.4943	0.840716	2.96688	0.00300843	0.024625
TOR1AIP2	ENSG00000169905.12	1213.38	-0.29563	0.0996712	-2.96605	0.00301651	0.0246786
MAP3K9	ENSG00000006432.15	40.8405	1.06966	0.360709	2.96543	0.0030226	0.0247155
HBB	ENSG00000244734.4	18.7271	2.47574	0.834911	2.96528	0.0030241	0.0247155
DNAJC8	ENSG00000126698.11	866.227	-0.297199	0.100253	-2.96448	0.00303192	0.0247669
CCL8	ENSG00000108700.5	188.422	-2.79456	0.943161	-2.96298	0.0030468	0.0248757
ICOSLG	ENSG00000160223.17	246.853	-0.522674	0.17643	-2.96251	0.00305146	0.0249011
CREB3	ENSG00000107175.12	309.721	-0.420523	0.141956	-2.96235	0.00305301	0.0249012
NOXA1	ENSG00000188747.8	104.351	0.619332	0.20911	2.96175	0.00305899	0.0249373
CUTC	ENSG00000119929.13	140.331	0.508042	0.171607	2.96049	0.00307148	0.0250264
PRRG1	ENSG00000130962.17	34.5933	1.02499	0.346448	2.95857	0.00309066	0.0251572
SYP	ENSG00000102003.10	19.7402	-1.38632	0.468648	-2.95812	0.00309524	0.0251817
TXNDC5	ENSG00000239264.9	1572.4	0.24428	0.0825954	2.95756	0.00310089	0.0252149
TXNL1	ENSG00000091164.13	365.482	-0.362101	0.122464	-2.9568	0.00310851	0.0252641
VPS13C	ENSG00000129003.18	3754.42	-0.258913	0.087573	-2.95654	0.00311115	0.0252693
DDO	ENSG00000203797.10	53.1281	-1.17771	0.398358	-2.95642	0.00311229	0.0252693
CHMP4C	ENSG00000164695.5	3.4752	-4.57365	1.54765	-2.95522	0.00312443	0.0253551
TNFRSF13C	ENSG00000159958.6	32.702	1.3915	0.470974	2.95452	0.0031316	0.0253939
P4HA1	ENSG00000122884.12	994.063	-0.314108	0.106317	-2.95444	0.00313238	0.0253939
CPNE2	ENSG00000140848.17	348.364	0.427411	0.144675	2.95428	0.00313397	0.025394
SPOCK2	ENSG00000107742.13	834.314	0.56776	0.192309	2.95233	0.00315383	0.0255365
NCOR2	ENSG00000196498.13	259.46	0.444449	0.150614	2.95091	0.00316841	0.0256343
CYP20A1	ENSG00000119004.16	825.262	0.333729	0.113105	2.95061	0.00317149	0.0256463
COQ10B	ENSG00000115520.8	211.505	-0.485042	0.164402	-2.95035	0.00317417	0.0256551
PSMD1	ENSG00000173692.13	1464.58	-0.234406	0.0794578	-2.95008	0.00317695	0.0256646
RPL15	ENSG00000174748.21	4216.04	0.240105	0.0813966	2.94981	0.00317969	0.0256739
PBK	ENSG00000168078.10	19.7232	-2.00506	0.67977	-2.94962	0.0031817	0.0256772
OAZ1	ENSG00000104904.12	8382.05	-0.252922	0.085783	-2.9484	0.00319426	0.0257569
SYNGR1	ENSG00000100321.15	37.5372	-1.37942	0.467861	-2.94835	0.00319478	0.0257569
NDUFB3	ENSG00000119013.9	245.07	-0.389389	0.13212	-2.94725	0.00320615	0.0258305
AC025165.3	ENSG00000257921.6	4.68861	-3.69769	1.25467	-2.94716	0.00320712	0.0258305
PGM2	ENSG00000169299.14	569.761	-0.360548	0.122375	-2.94625	0.00321654	0.0258893
ZNF83	ENSG00000167766.18	358.195	-0.535158	0.181647	-2.94614	0.00321764	0.0258893
VAMP3	ENSG00000049245.13	1168.84	-0.265109	0.0900302	-2.94467	0.00323301	0.0259999
COA1	ENSG00000106603.18	240.456	0.402809	0.13681	2.94428	0.00323704	0.0260193
SGMS1	ENSG00000198964.14	1138.6	0.320173	0.108834	2.94184	0.00326268	0.0261973
PPDPF	ENSG00000125534.10	70.986	0.894952	0.304236	2.94164	0.00326481	0.0261973
MTRF1L	ENSG00000112031.16	217.035	-0.46938	0.159568	-2.94156	0.00326567	0.0261973
LAMA3	ENSG00000053747.16	27.66	-1.7699	0.601755	-2.94123	0.00326908	0.0261973
FYCO1	ENSG00000163820.15	323.483	-0.351123	0.119384	-2.94112	0.00327029	0.0261973
TMEM91	ENSG00000142046.15	109.509	-0.725965	0.246835	-2.94109	0.00327058	0.0261973
CALCOCO1	ENSG00000012822.16	632.153	0.338642	0.115145	2.941	0.00327151	0.0261973
CDKN2A	ENSG00000147889.17	12.1084	-2.36724	0.805582	-2.93854	0.00329757	0.0263871
NIPSNAP1	ENSG00000184117.12	165.9	-0.616592	0.209858	-2.93814	0.00330185	0.0264082
BIRC5	ENSG00000089685.15	87.2519	-1.23864	0.421711	-2.93717	0.00331217	0.0264776
MYL12B	ENSG00000118680.13	1853.71	-0.273258	0.0930639	-2.93624	0.00332212	0.0265308
MIF	ENSG00000240972.2	378.34	-0.340475	0.11598	-2.93562	0.00332879	0.0265708
ATP5F1B	ENSG00000110955.9	4745.09	-0.214801	0.0731774	-2.93535	0.00333171	0.026581
C17orf113	ENSG00000267221.3	15.3618	1.50715	0.513631	2.93431	0.00334294	0.0266573
CNR2	ENSG00000188822.8	27.6342	1.13777	0.388051	2.93201	0.00336779	0.0268422
FBLN7	ENSG00000144152.13	11.2724	1.98105	0.67615	2.9299	0.00339072	0.0269981
HOMER1	ENSG00000152413.15	19.2872	-1.57775	0.538708	-2.92877	0.00340306	0.027083
PRR5	ENSG00000186654.21	220.384	0.487719	0.166648	2.92664	0.00342646	0.0272557
MED16	ENSG00000175221.15	243.943	0.398391	0.136156	2.926	0.00343355	0.0272882
AC002996.1	ENSG00000257767.3	100.368	0.926548	0.316665	2.92596	0.00343394	0.0272882
TMEM126A	ENSG00000171202.7	109.27	-0.573943	0.196216	-2.92505	0.003444	0.0273546
GAREM1	ENSG00000141441.16	12.4359	-1.7529	0.59936	-2.92463	0.00344871	0.0273785
HYOU1	ENSG00000149428.19	957.915	-0.385394	0.131823	-2.92358	0.00346034	0.0274437
BTN3A2	ENSG00000186470.14	898.686	-0.609746	0.208609	-2.92292	0.0034677	0.0274763
FOXM1	ENSG00000111206.12	74.5041	-1.14435	0.391513	-2.9229	0.00346787	0.0274763
GSTM1	ENSG00000134184.13	179.253	-0.495996	0.169718	-2.92248	0.00347259	0.0275002
MAST3	ENSG00000099308.10	271.632	0.4695	0.160841	2.91904	0.00351114	0.0277778
CEACAM3	ENSG00000170956.17	5.71737	3.45273	1.18289	2.91889	0.00351283	0.0277778
IL16	ENSG00000172349.17	1342.48	0.332413	0.113891	2.9187	0.00351498	0.0277811
ASGR2	ENSG00000161944.16	13.1818	2.10906	0.722791	2.91794	0.00352353	0.027835
SHC3	ENSG00000148082.10	11.2585	-1.87737	0.643706	-2.91651	0.00353975	0.0279494
HAPLN3	ENSG00000140511.11	135.785	-1.14462	0.392595	-2.91552	0.00355102	0.0280246
PKN1	ENSG00000123143.12	1403.44	0.257086	0.0881969	2.91491	0.00355796	0.0280656
KREMEN1	ENSG00000183762.12	28.9078	-1.19606	0.410357	-2.91468	0.0035605	0.0280719
PTPN12	ENSG00000127947.16	232.772	-0.530749	0.182123	-2.91424	0.00356556	0.028098
NDST2	ENSG00000166507.18	361.872	0.402525	0.138187	2.9129	0.00358085	0.0282047
PTPRM	ENSG00000173482.16	320.897	0.374492	0.128585	2.9124	0.00358667	0.0282367
RECQL	ENSG00000004700.16	718.094	-0.38173	0.131123	-2.91125	0.00359989	0.0283077
TBKBP1	ENSG00000198933.9	69.4042	0.796405	0.27358	2.91105	0.00360221	0.0283077
GBP5	ENSG00000154451.14	815.751	-2.53023	0.869241	-2.91085	0.00360452	0.0283077
KIF21B	ENSG00000116852.14	445.907	0.547662	0.188146	2.91083	0.0036047	0.0283077
KIAA1841	ENSG00000162929.14	117.114	-0.702067	0.241201	-2.91071	0.00360606	0.0283077
HSD17B7	ENSG00000132196.14	131.767	-0.606301	0.208301	-2.9107	0.00360625	0.0283077
AL157935.3	ENSG00000257524.6	95.637	-1.31829	0.453001	-2.91012	0.00361286	0.0283457
CFB	ENSG00000243649.9	39.9626	-1.94015	0.667077	-2.90843	0.00363251	0.0284721
CASTOR1	ENSG00000239282.7	73.7899	0.732869	0.252013	2.90806	0.00363681	0.0284813
PLCG2	ENSG00000197943.10	844.333	0.316453	0.108821	2.90802	0.00363723	0.0284813
NRROS	ENSG00000174004.6	473.83	-0.335487	0.115373	-2.90785	0.00363923	0.0284831
ATP5F1C	ENSG00000165629.20	997.794	-0.349306	0.120156	-2.9071	0.00364795	0.0285375
LAPTM5	ENSG00000162511.8	12204	-0.269471	0.092746	-2.90547	0.00366702	0.0286727
CDA	ENSG00000158825.6	89.6447	-0.611146	0.210417	-2.90445	0.00367893	0.0287513
PECR	ENSG00000115425.14	96.3681	0.618148	0.212838	2.90431	0.00368065	0.0287513
RPL38	ENSG00000172809.13	1102.75	0.272475	0.0938679	2.90275	0.00369897	0.0288804
ERP29	ENSG00000089248.7	2296.68	0.268168	0.0924229	2.90153	0.00371344	0.0289696
CNPY3	ENSG00000137161.17	1027.99	0.277806	0.0957461	2.90148	0.00371401	0.0289696
BAK1	ENSG00000030110.13	522.317	-0.348867	0.120261	-2.90092	0.00372068	0.0290075
FNDC5	ENSG00000160097.18	28.4002	1.85768	0.640444	2.90061	0.00372433	0.029022
RASSF1	ENSG00000068028.17	422.101	0.401022	0.138277	2.90012	0.00373014	0.0290532
GOLGA4	ENSG00000144674.16	1587.02	-0.31709	0.109355	-2.89964	0.00373588	0.0290838
CXCL10	ENSG00000169245.6	464.774	-3.88827	1.34228	-2.89676	0.00377038	0.0293382
GCA	ENSG00000115271.11	241.845	-0.497683	0.171858	-2.8959	0.00378068	0.0293946
COL5A3	ENSG00000080573.7	15.2004	-1.79387	0.619462	-2.89585	0.00378129	0.0293946
RGL3	ENSG00000205517.12	13.1114	1.73759	0.600093	2.89554	0.00378512	0.0294102
RPL6	ENSG00000089009.15	4076.44	0.205775	0.0710927	2.89446	0.00379806	0.0294964
SNRPE	ENSG00000182004.13	101.803	-0.570416	0.197208	-2.89246	0.00382242	0.0296603
ANKRD13A	ENSG00000076513.17	841.743	-0.271732	0.0939463	-2.89242	0.00382285	0.0296603
IKBIP	ENSG00000166130.15	146.641	-0.549874	0.19014	-2.89195	0.00382864	0.0296909
RASGRF1	ENSG00000058335.15	22.747	-1.33391	0.461402	-2.891	0.00384019	0.0297661
VPS41	ENSG00000006715.16	1595.6	-0.264641	0.0915492	-2.8907	0.00384386	0.0297802
MBTPS1	ENSG00000140943.17	1014.81	0.247874	0.0857581	2.89039	0.00384769	0.0297955
LRRCC1	ENSG00000133739.16	59.8539	-1.10563	0.382628	-2.88957	0.00385774	0.0298536
ASH1L	ENSG00000116539.13	953.22	0.297893	0.103097	2.88945	0.00385922	0.0298536
ZNF688	ENSG00000229809.8	90.4945	0.604644	0.209269	2.88932	0.00386077	0.0298536
SCPEP1	ENSG00000121064.13	4605.4	-0.616489	0.213422	-2.88859	0.00386979	0.029909
HELLS	ENSG00000119969.15	54.3556	-1.20598	0.417524	-2.88841	0.0038719	0.0299109
CDC25B	ENSG00000101224.17	414.187	0.369609	0.128019	2.88715	0.00388755	0.0300174
NDUFB9	ENSG00000147684.9	724.885	-0.436485	0.151197	-2.88687	0.00389096	0.0300293
PTOV1	ENSG00000104960.15	258.658	0.380365	0.131829	2.88529	0.00391051	0.0301657
GPSM3	ENSG00000213654.10	784.094	0.316931	0.109887	2.88415	0.00392468	0.0302315
ANKRD11	ENSG00000167522.16	478.328	0.387958	0.134553	2.88331	0.00393516	0.0302977
HPS5	ENSG00000110756.18	1045.43	-0.269611	0.0935196	-2.88294	0.00393984	0.0303094
TRIM69	ENSG00000185880.13	465.14	-0.627945	0.217818	-2.88289	0.00394045	0.0303094
GALNT7	ENSG00000109586.12	265.589	-0.405024	0.140503	-2.88268	0.00394313	0.0303155
CIT	ENSG00000122966.16	109.606	-1.07601	0.373314	-2.88233	0.00394746	0.030328
RPS25	ENSG00000118181.11	2261.37	0.272546	0.0945604	2.88225	0.00394852	0.030328
NPIPB12	ENSG00000169203.16	75.8689	0.9012	0.31277	2.88135	0.00395975	0.0303997
UBA5	ENSG00000081307.12	144.418	-0.474871	0.164835	-2.88089	0.00396557	0.0304298
UBXN4	ENSG00000144224.17	769.178	-0.304496	0.105708	-2.88054	0.00396989	0.0304485
IER5L	ENSG00000188483.8	334.667	0.64375	0.223659	2.87826	0.00399873	0.0306431
GCLC	ENSG00000001084.13	1002.6	-0.629563	0.218732	-2.87823	0.00399907	0.0306431
CHMP5	ENSG00000086065.14	500.379	-0.405074	0.140759	-2.87779	0.00400471	0.0306716
MYLK	ENSG00000065534.18	16.6506	-1.49875	0.520859	-2.87745	0.00400898	0.0306844
TAF13	ENSG00000197780.10	103.191	-0.638283	0.22183	-2.87736	0.0040102	0.0306844
ZNF467	ENSG00000181444.13	70.3636	1.10528	0.384343	2.87576	0.00403057	0.0308252
PSMD2	ENSG00000175166.17	1614.91	-0.249104	0.0866265	-2.87561	0.00403243	0.0308252
CHEK1	ENSG00000149554.13	75.0776	-0.760521	0.264501	-2.8753	0.00403642	0.030841
TMSB4Y	ENSG00000154620.6	3.35671	5.17875	1.80126	2.87508	0.00403931	0.0308447
ATG4C	ENSG00000125703.15	282.918	-0.381975	0.132873	-2.87474	0.00404357	0.0308516
IRAK1	ENSG00000184216.14	2419.52	0.430078	0.149776	2.87147	0.00408563	0.0311578
VWA5A	ENSG00000110002.16	954.437	0.57451	0.200113	2.87093	0.00409263	0.0311963
COPG1	ENSG00000181789.14	1621.03	-0.290864	0.10138	-2.86903	0.00411727	0.0313693
DARS2	ENSG00000117593.12	391.752	-0.320556	0.111797	-2.86731	0.00413975	0.0315106
SLC30A5	ENSG00000145740.19	396.495	-0.422131	0.147234	-2.86707	0.00414292	0.0315106
LDLRAD3	ENSG00000179241.13	77.9936	0.803331	0.280201	2.86698	0.00414409	0.0315106
LYPLAL1	ENSG00000143353.12	106.376	-0.626565	0.21855	-2.86692	0.0041449	0.0315106
CUL4B	ENSG00000158290.17	385.729	-0.364515	0.127148	-2.86686	0.00414561	0.0315106
UBE2N	ENSG00000177889.10	382.613	-0.445554	0.155436	-2.86648	0.00415065	0.0315339
SMIM3	ENSG00000256235.2	285.012	-0.417863	0.145795	-2.8661	0.00415567	0.0315572
ZDHHC21	ENSG00000175893.11	155.982	-0.582971	0.203449	-2.86544	0.00416436	0.0316082
ALPK1	ENSG00000073331.18	555.287	-0.378263	0.132029	-2.86501	0.00416994	0.0316357
NIT2	ENSG00000114021.12	277.908	-0.429391	0.149898	-2.86456	0.0041759	0.0316616
C19orf25	ENSG00000119559.16	301.622	0.440496	0.15378	2.86445	0.00417729	0.0316616
IPO11	ENSG00000086200.16	180.015	-0.490788	0.171368	-2.86394	0.00418407	0.031698
ACLY	ENSG00000131473.17	1499.75	-0.289757	0.101198	-2.86326	0.00419304	0.0317509
MAU2	ENSG00000129933.21	488.439	0.380404	0.132868	2.86303	0.00419608	0.031759
P4HTM	ENSG00000178467.18	287.902	0.462946	0.161796	2.86129	0.00421924	0.0319193
GRSF1	ENSG00000132463.14	686.546	-0.265001	0.0926401	-2.86054	0.00422916	0.031971
GTSE1	ENSG00000075218.19	53.8501	-1.24614	0.435641	-2.86048	0.00423005	0.031971
ANKRD46	ENSG00000186106.11	101.959	0.558688	0.195366	2.8597	0.00424043	0.0320344
TRMT9B	ENSG00000250305.9	18.05	1.3935	0.487418	2.85894	0.00425061	0.0320962
DDX3X	ENSG00000215301.10	4321.15	-0.401201	0.140425	-2.85705	0.00427603	0.032273
TSPAN31	ENSG00000135452.10	391.772	0.307447	0.107645	2.85613	0.00428835	0.0323508
SIN3B	ENSG00000127511.9	378.139	0.418188	0.146444	2.85562	0.00429528	0.0323879
TSPAN17	ENSG00000048140.18	456.479	-0.366602	0.128386	-2.85547	0.00429736	0.0323884
PIK3R2	ENSG00000105647.18	223.253	0.423185	0.148255	2.85443	0.00431136	0.0324787
PAQR5	ENSG00000137819.14	112.213	-0.894651	0.313463	-2.85408	0.00431611	0.0324992
MELTF	ENSG00000163975.12	83.617	-1.22188	0.428221	-2.85338	0.00432564	0.0325496
CCT6A	ENSG00000146731.11	971.047	-0.283659	0.0994147	-2.85329	0.00432686	0.0325496
PLEKHA5	ENSG00000052126.14	60.0278	0.802766	0.281424	2.85251	0.00433751	0.0326019
POLE3	ENSG00000148229.13	365.179	-0.363483	0.127427	-2.85249	0.00433786	0.0326019
NR2C2	ENSG00000177463.15	470.775	0.318923	0.111814	2.85227	0.00434081	0.0326089
RAB33A	ENSG00000134594.5	17.3738	1.39999	0.491319	2.84945	0.00437949	0.0328774
EIF1AX	ENSG00000173674.11	321.018	-0.44081	0.154705	-2.84937	0.00438065	0.0328774
TSPYL2	ENSG00000184205.14	93.4842	0.747424	0.26234	2.84907	0.00438471	0.0328925
CYBRD1	ENSG00000071967.12	868.222	-0.547978	0.192361	-2.8487	0.00438982	0.0329154
PFKM	ENSG00000152556.17	341.534	0.465954	0.163594	2.84824	0.00439615	0.0329476
ACADS	ENSG00000122971.9	382.505	0.319421	0.112236	2.84598	0.0044275	0.0331452
SLC6A7	ENSG00000011083.9	3.26214	-4.46428	1.56864	-2.84595	0.00442785	0.0331452
CSE1L	ENSG00000124207.17	559.569	-0.351234	0.123453	-2.84509	0.00443988	0.0332133
HLA-DPB1	ENSG00000223865.11	4049.38	-0.580682	0.204147	-2.84443	0.00444904	0.0332338
DENND4B	ENSG00000198837.10	879.809	0.269374	0.0947029	2.84441	0.00444932	0.0332338
NMNAT3	ENSG00000163864.17	46.2245	1.03452	0.363721	2.84427	0.00445127	0.0332338
GADD45B	ENSG00000099860.9	394.323	0.66401	0.233459	2.84423	0.00445189	0.0332338
CYSLTR2	ENSG00000152207.7	37.2356	-1.52309	0.535516	-2.84415	0.00445294	0.0332338
MAP4K1	ENSG00000104814.13	92.4461	0.816951	0.28733	2.84325	0.00446555	0.0333124
SRD5A1	ENSG00000145545.12	183.257	-0.426024	0.149879	-2.84246	0.00447671	0.0333767
ASGR1	ENSG00000141505.12	43.6954	0.866115	0.304719	2.84234	0.00447832	0.0333767
NUAK2	ENSG00000163545.10	85.6133	0.598909	0.210731	2.84206	0.00448231	0.033391
CFP	ENSG00000126759.13	102.087	0.969562	0.341216	2.84149	0.00449033	0.0334352
FBXO6	ENSG00000116663.11	228.894	-0.879479	0.309547	-2.84118	0.00449463	0.0334516
OMA1	ENSG00000162600.12	188.419	-0.496963	0.174923	-2.84104	0.0044967	0.0334516
CCDC88A	ENSG00000115355.17	2958.59	-0.359071	0.126449	-2.83965	0.00451637	0.0335698
SIGLEC7	ENSG00000168995.13	562.698	0.502606	0.177004	2.83953	0.00451807	0.0335698
PATL2	ENSG00000229474.6	66.0406	0.917805	0.323231	2.83947	0.00451885	0.0335698
TBCA	ENSG00000171530.14	275.595	-0.403828	0.142242	-2.83902	0.00452519	0.0336014
CHST2	ENSG00000175040.6	43.3725	-0.880017	0.310082	-2.83801	0.00453954	0.0336924
MCEE	ENSG00000124370.11	37.4991	0.913452	0.321891	2.83777	0.00454303	0.0336975
ACSS1	ENSG00000154930.15	518.198	0.566469	0.199625	2.83767	0.00454442	0.0336975
LLGL2	ENSG00000073350.13	84.6509	0.789447	0.278321	2.83646	0.00456173	0.0338102
KNSTRN	ENSG00000128944.13	106.182	-0.706506	0.24925	-2.83453	0.00458928	0.0339987
PTCRA	ENSG00000171611.9	12.0551	-2.08624	0.736067	-2.83431	0.00459253	0.0340072
CHDH	ENSG00000016391.11	17.788	1.50785	0.532077	2.83389	0.00459849	0.0340199
DCAF7	ENSG00000136485.15	1289.77	-0.344654	0.121676	-2.83256	0.00461765	0.0341303
LRRC58	ENSG00000163428.4	551.984	-0.374399	0.132217	-2.83171	0.00463005	0.0341904
BCOR	ENSG00000183337.17	329.587	0.441313	0.155898	2.83078	0.00464348	0.0342684
PEX11G	ENSG00000104883.8	25.8603	1.19565	0.422388	2.83068	0.00464486	0.0342684
SLC35E2B	ENSG00000189339.12	682.506	0.342071	0.120852	2.83049	0.00464772	0.0342737
NEURL3	ENSG00000163121.10	18.1262	-1.33622	0.472268	-2.82938	0.00466386	0.0343668
SERBP1	ENSG00000142864.14	1649.29	-0.217005	0.0766986	-2.82933	0.00466462	0.0343668
VIM	ENSG00000026025.16	27479.8	-0.261278	0.0923786	-2.82834	0.00467901	0.034457
AKAP5	ENSG00000179841.8	8.19131	-2.4129	0.853415	-2.82735	0.00469352	0.0345353
MAP1LC3B	ENSG00000140941.14	520.178	-0.31033	0.109837	-2.82536	0.00472279	0.0347158
[truncated: 1,788 more rows]

## Sheet: Table S5
Supplemental Table 5: Common DEG shared between TREM2 WT versus TREM2 knockout (KO) iMGLs and NHD versus SB CTRL iMGLs
Gene Name	L2FC_NHDvsWT	pval_NHDvsWT	padj_NHDvsWT	L2FC_TREM2KOvsWT	pval_TREM2KOvsWT	padj_TREM2KOvsWT
GLUL	-1.48014	0	0	-0.387226	0.0102	0.045
ARHGEF12	-1.5574	1.26e-82	2.8e-79	-0.769588	1.48e-09	4.2e-08
CDH1	-3.41323	1.9e-62	2.47e-59	-0.915027	0.0401	0.129
SPP1	-0.633252	5.23e-47	4.79e-44	-0.790205	5.59e-14	3.09e-12
TREM2	-1.37674	4.29e-41	3.34e-38	-1.48361	1.5e-166	2.04e-162
PLAU	-1.32009	8.47e-41	6.28e-38	-1.28676	8.64e-07	1.41e-05
CADM1	-0.967949	8.58e-33	4.17e-30	-1.14905	6.24e-20	6.9e-18
BCAP31	-0.562855	3.23e-30	1.44e-27	-0.131441	5.21e-05	0.000534
CCL4	-1.06537	1.49e-24	4.83e-22	-1.22583	3.02e-16	2.22e-14
CCL3	-0.980344	2.42e-24	7.69e-22	-1.26782	2.32e-20	2.7e-18
CD52	-2.40689	8.34e-20	1.88e-17	-2.32972	0.000255	0.00211
LPL	-0.558559	1.51e-18	3.13e-16	-1.96016	3.23e-07	5.77e-06
FTH1	-0.442648	4.04e-18	8.16e-16	-0.289835	1.51e-06	2.35e-05
EMP1	-1.66523	5.33e-17	9.53e-15	-1.29848	3.35e-17	2.69e-15
SP140	-0.751781	4.79e-16	7.84e-14	-0.734948	2.84e-07	5.14e-06
FCGR1A	-0.369959	3.89e-15	5.75e-13	-0.423111	0.00219	0.0127
LNX1	-3.67953	5.85e-14	7.47e-12	-0.829723	3.46e-12	1.48e-10
CALHM2	-0.605546	1.15e-13	1.41e-11	-0.0806327	0.0329	0.112
NCAM1	-4.05066	1.01e-12	1.09e-10	-3.51605	1.03e-57	1.27e-54
CCL3L3	-1.39142	1.82e-12	1.85e-10	-0.360362	0.0119	0.0505
MYO1E	-0.461965	5.15e-12	4.92e-10	-0.928313	1.96e-11	7.48e-10
LAMP2	-0.794581	6.27e-12	5.88e-10	-0.334571	3.91e-07	6.88e-06
PDHA1	-0.37127	1.46e-11	1.32e-09	-0.0812789	0.0139	0.0575
RHOB	-0.716002	1.9e-11	1.66e-09	-0.465591	9.34e-10	2.74e-08
SLIT3	-1.63248	1.92e-11	1.67e-09	-0.663911	3.23e-07	5.77e-06
CD44	-1.01775	8.25e-11	6.32e-09	-0.557709	6.92e-31	2.24e-28
SH3BGRL	-0.636205	1.16e-10	8.66e-09	-0.183062	0.0143	0.0588
PHF6	-0.52546	3.75e-10	2.62e-08	-0.128713	0.0175	0.0689
HCCS	-0.609561	5.65e-10	3.81e-08	-0.162256	0.0353	0.118
MORF4L2	-0.348692	6.93e-10	4.6e-08	-0.279612	2.29e-05	0.000261
ATP6AP2	-0.63303	2.44e-09	1.51e-07	-0.0480629	0.0351	0.117
CHN2	-1.62837	4.71e-09	2.69e-07	-0.614804	0.000403	0.00305
TRAF3	-0.509332	4.82e-09	2.74e-07	-0.361794	2.25e-09	6.14e-08
FAM20A	-1.72601	5.48e-09	3.09e-07	-2.35608	4.64e-37	2.43e-34
SMC1A	-0.256161	7.9e-09	4.28e-07	-0.215558	9.87e-09	2.4e-07
FN1	-0.813621	1.57e-08	8.03e-07	-1.83317	0.00346	0.0185
TNFRSF9	-1.49314	1.82e-08	9.12e-07	-1.45757	1.67e-18	1.66e-16
C15orf48	-1.33096	1.89e-08	9.41e-07	-1.49677	1.19e-47	1.16e-44
VMA21	-0.466847	2.48e-08	1.21e-06	-0.112954	0.0168	0.0668
CDKN1A	-0.418205	2.51e-08	1.22e-06	-0.230038	4.54e-05	0.000474
STEAP3	-1.63143	2.82e-08	1.36e-06	-0.658935	0.00729	0.0342
CD82	-0.707244	3.09e-08	1.47e-06	-0.760741	0.00413	0.0214
CDCP1	-1.24149	3.13e-08	1.49e-06	-1.12539	0.0314	0.108
MYO1B	-1.52029	5.69e-08	2.58e-06	-1.23594	7.03e-15	4.37e-13
CYB561A3	-0.532282	6.93e-08	3.02e-06	-0.221323	8.35e-05	0.000804
LRMDA	-1.00649	7.03e-08	3.06e-06	-0.661349	0.00499	0.0249
CPVL	-1.3342	9.21e-08	3.9e-06	-0.889384	3.35e-10	1.06e-08
FLNA	-1.29624	9.33e-08	3.94e-06	-0.255025	0.0178	0.0697
TRAF3IP3	-0.415933	1.45e-07	5.85e-06	-0.21131	0.0318	0.109
SOD2	-0.373634	2.95e-07	1.13e-05	-0.131426	0.00084	0.00568
PDE3B	-0.943573	2.99e-07	1.14e-05	-2.28943	6.04e-06	8.04e-05
PTCRA	-1.48659	3.44e-07	1.29e-05	-0.910292	0.00345	0.0185
SLC8A1	-0.185628	6.98e-07	2.41e-05	-0.0901902	0.00674	0.032
PNPO	-0.278225	8.03e-07	2.72e-05	-0.263165	8.19e-05	0.000793
PLXNA1	-0.690054	1.04e-06	3.43e-05	-0.265984	6.89e-06	9.1e-05
MAGEH1	-0.769771	1.29e-06	4.14e-05	-0.199385	0.0468	0.144
SUCNR1	-1.4168	1.59e-06	4.98e-05	-1.1926	1.37e-05	0.000166
HM13	-0.28194	1.72e-06	5.34e-05	-0.363572	1.31e-17	1.15e-15
CYP27A1	-2.74884	2.28e-06	6.89e-05	-3.03165	1.27e-07	2.49e-06
GUCY1A1	-1.25898	2.55e-06	7.65e-05	-0.80084	8.01e-10	2.37e-08
FCGR1B	-0.362657	3.29e-06	9.52e-05	-0.44147	0.00372	0.0196
ANGPTL6	-1.24738	4.13e-06	0.000116	-0.552446	1.63e-08	3.82e-07
VSIG4	-0.50773	4.36e-06	0.000122	-0.797384	0.000432	0.00325
MPP1	-0.505953	4.47e-06	0.000125	-0.443233	0.00031	0.00247
CCL2	-0.767336	4.74e-06	0.000131	-0.240497	0.00619	0.0299
MOSPD2	-0.502098	5.65e-06	0.000153	-0.211122	0.0195	0.0749
NAA10	-0.469425	6.02e-06	0.000161	-0.334599	7.7e-10	2.28e-08
CD300LF	-0.242311	7.04e-06	0.000184	-0.346719	0.0431	0.136
RGS1	-1.03686	7.63e-06	0.000198	-1.01356	3.02e-14	1.71e-12
MAOA	-0.683087	9.36e-06	0.000234	-0.845961	2.71e-05	0.000302
ICOSLG	-0.963388	1.22e-05	0.000292	-0.698645	2.36e-31	7.82e-29
PCK2	-0.35033	1.39e-05	0.000328	-0.0896446	0.0196	0.0752
ZC3H12C	-0.33733	2.27e-05	0.000502	-0.75141	0.0391	0.126
MCRIP1	-0.318596	2.49e-05	0.000541	-0.118172	0.0258	0.0927
AGO1	-0.267336	2.82e-05	0.000606	-0.22087	0.002	0.0118
LGALS3	-0.939881	4.43e-05	0.00089	-1.02607	2.87e-05	0.000317
GNB4	-0.227471	4.96e-05	0.000985	-0.560441	0.0363	0.12
C1orf21	-2.54934	4.99e-05	0.000988	-3.21766	2.17e-36	9.53e-34
IFI6	-0.727592	5.15e-05	0.00102	-0.302426	0.0322	0.11
PHLDA1	-0.852333	5.49e-05	0.00108	-0.814213	1.42e-11	5.48e-10
SNX24	-0.53641	7.32e-05	0.00138	-0.700212	1.85e-06	2.8e-05
SERPINI1	-1.50371	8.17e-05	0.00152	-0.9651	3.33e-05	0.000363
IGBP1	-0.306185	8.42e-05	0.00157	-0.770812	8.72e-05	0.00084
LNPK	-0.449291	9.03e-05	0.00166	-0.368361	0.000219	0.00184
LY96	-0.662511	0.000102	0.00184	-0.949625	1.53e-10	5.09e-09
MAFF	-0.545185	0.000124	0.00217	-0.841029	1.75e-06	2.67e-05
LYZ	-0.561917	0.000132	0.00228	-0.353274	0.03	0.104
PDLIM7	-0.863703	0.000149	0.00254	-0.549202	1.81e-39	1.17e-36
LHFPL2	-0.220231	0.000162	0.00271	-0.249582	0.014	0.0578
STBD1	-4.62928	0.000163	0.00272	-1.64957	0.000441	0.00331
RYK	-0.496812	0.000172	0.00285	-0.506673	3.25e-08	7.15e-07
AGPS	-0.220286	0.00018	0.00296	-0.179491	0.0495	0.15
PGK1	-0.139062	0.000186	0.00303	-0.122293	0.00017	0.00148
PDXK	-0.152359	0.000223	0.00352	-0.219535	0.00702	0.0332
P2RY11	-0.304309	0.000228	0.00357	-0.179397	0.00792	0.0365
LONRF3	-1.69261	0.000262	0.00401	-2.19085	9.83e-10	2.87e-08
DDB2	-0.335289	0.000267	0.00406	-0.220841	6.98e-07	1.15e-05
EPHB2	-0.547426	0.00028	0.00421	-0.460551	0.000306	0.00245
OPTN	-1.51981	0.000285	0.00427	-1.19604	1.57e-09	4.4e-08
GALNT1	-0.246924	0.000295	0.0044	-0.100807	0.0314	0.108
RAB10	-0.165723	0.000317	0.00467	-0.170275	0.0234	0.0862
FRRS1	-0.935283	0.000338	0.00495	-0.534513	0.00011	0.00102
BRCC3	-0.38239	0.000348	0.00506	-0.248608	9.12e-07	1.49e-05
CYFIP1	-0.325738	0.00035	0.00508	-0.147026	0.00233	0.0134
PRDX4	-0.353231	0.000424	0.00596	-1.4096	0.00182	0.0109
BEX3	-1.31528	0.000431	0.00601	-0.941905	1.31e-21	1.66e-19
BSG	-0.198508	0.000497	0.00676	-0.122127	0.0029	0.0161
SLC16A10	-4.36981	0.000501	0.0068	-1.91023	1.19e-26	2.56e-24
KCNC4	-0.745874	0.000534	0.00715	-0.521865	0.000171	0.00149
ANAPC11	-0.261697	0.000554	0.00735	-0.192922	0.000572	0.00414
SLC39A11	-0.238757	0.000743	0.00934	-0.145762	0.00151	0.00935
THOC3	-0.347861	0.00106	0.0125	-0.227645	3.18e-06	4.59e-05
FLT1	-3.9555	0.00114	NA	-0.782476	0.0483	0.148
HSPA4L	-1.06216	0.0012	0.0138	-0.693082	4.53e-05	0.000473
HEXB	-0.229862	0.00123	0.014	-0.327371	0.0312	0.108
TREM1	-2.21171	0.00141	0.0157	-1.75191	1.78e-09	4.93e-08
MAN2B2	-0.247452	0.00143	0.0158	-0.153545	0.0184	0.0716
SLC44A1	-0.239147	0.00147	0.0162	-0.320003	4.99e-06	6.78e-05
BCL2A1	-1.14214	0.00156	0.0171	-0.806328	0.000219	0.00184
TNFRSF21	-0.541693	0.00162	0.0174	-0.728292	7.79e-13	3.69e-11
PRPS2	-0.418392	0.00162	0.0175	-0.212519	1.79e-05	0.000211
TUBB6	-0.546853	0.00169	0.0179	-1.39681	8.56e-17	6.58e-15
ABLIM1	-1.8474	0.00176	0.0185	-1.28638	9.23e-06	0.000118
MAP3K2	-0.179729	0.00184	0.0193	-0.114385	0.0481	0.147
DDX11	-0.288996	0.00192	0.0199	-0.194041	0.000322	0.00255
VPS37B	-0.301436	0.00197	0.0203	-0.392679	0.0488	0.148
DDIT3	-0.384037	0.00202	0.0208	-0.218822	2.58e-05	0.000289
PTER	-0.376854	0.00208	0.0212	-0.223108	0.000231	0.00193
HSD17B10	-0.270909	0.00221	0.0222	-0.107598	0.0333	0.113
EDNRB	-0.934903	0.00224	0.0224	-2.52175	5.63e-09	1.43e-07
CHIT1	-0.846366	0.0023	0.0229	-1.72343	6.09e-30	1.76e-27
ADA	-0.4815	0.00257	0.0251	-0.374759	0.0225	0.0839
PDE3A	-2.17648	0.00257	0.0251	-2.15379	0.00595	0.0289
MR1	-0.371265	0.00259	0.0252	-0.365509	7.81e-13	3.69e-11
FCGR2B	-0.556176	0.00275	0.0264	-0.537157	0.0313	0.108
TIMP3	-1.57925	0.00285	0.0272	-2.757	6.66e-92	2.27e-88
FABP5	-0.297568	0.0029	0.0276	-0.69641	2.82e-06	4.09e-05
OSTM1	-0.277621	0.00312	0.0293	-0.466035	0.00619	0.0299
CTSD	-0.357285	0.00321	0.0299	-0.903008	0.0036	0.0191
SCRIB	-0.287546	0.00329	0.0304	-0.125415	0.0276	0.0977
TCN2	-0.608918	0.00347	0.0316	-0.819748	3.72e-16	2.71e-14
WDR91	-0.380901	0.00347	0.0317	-0.274337	0.00872	0.0394
ARL4C	-0.415263	0.00354	0.0322	-0.619406	0.000303	0.00243
CLEC19A	-1.6168	0.00363	0.0329	-0.944905	0.0124	0.0523
SIL1	-0.313292	0.00377	0.0339	-0.49378	8.13e-07	1.33e-05
H6PD	-0.332091	0.00379	0.0341	-0.133468	0.0037	0.0195
TMEM64	-0.368327	0.00383	0.0344	-0.484085	0.0148	0.0606
GPRIN3	-0.340824	0.00392	0.035	-4.06455	0.00242	0.0138
MAST4	-1.40712	0.00396	0.0353	-0.501317	0.0209	0.0792
ISG15	-0.584528	0.00421	0.0369	-0.227258	0.00747	0.0348
MPP6	-0.900085	0.00461	0.0395	-0.356738	0.000118	0.00108
IL2RG	-0.602791	0.00462	0.0396	-1.01842	3.53e-11	1.29e-09
SMAD5	-0.239828	0.00462	0.0396	-0.340206	0.0261	0.0937
CD6	-0.867073	0.00527	0.0438	-0.578265	0.000571	0.00414
DOP1B	-0.217011	0.00539	0.0445	-0.403784	2.97e-05	0.000327
PECAM1	-0.153888	0.00567	0.0464	-0.132572	0.0109	0.0474
ZNF804A	-0.503957	0.00567	0.0464	-3.78511	0.000928	0.00618
WFS1	-0.315751	0.00569	0.0465	-0.573764	0.00095	0.0063
FZD7	-1.01576	0.00585	0.0475	-1.14451	2.18e-07	4.07e-06
AC068580.4	-0.526436	0.00601	0.0484	-0.50132	2.35e-06	3.48e-05
PTPRS	-1.96713	0.00625	0.0499	-0.506451	8.18e-07	1.34e-05
PNPLA4	-0.717652	0.00666	0.0524	-0.226086	0.0357	0.119
PIN1	-0.212064	0.00675	0.0529	-0.107148	0.0152	0.062
SYTL3	-0.697514	0.00685	0.0535	-0.863869	3.05e-19	3.19e-17
ISCU	-0.243736	0.00711	0.0551	-0.160381	0.000704	0.0049
FPGT	-0.42431	0.00715	0.0553	-0.205984	0.0173	0.0682
TMEM30A	-0.249037	0.00783	0.059	-0.377975	0.0184	0.0715
PCDH20	-0.862946	0.00799	0.0599	-1.74404	0.00022	0.00185
KLRC4-KLRK1	-0.845883	0.00805	0.0603	-1.63951	4.98e-08	1.06e-06
MMP12	-2.01832	0.00823	0.0613	-1.12084	0.0273	0.097
NPC2	-0.15652	0.00831	0.0617	-0.187638	0.0226	0.084
FEZ1	-1.45287	0.00885	0.0646	-0.748692	9.35e-06	0.000119
RAD50	-0.29965	0.00894	0.065	-0.189758	0.0333	0.113
TMEM144	-0.202646	0.00908	0.0658	-0.446913	0.00419	0.0216
ARMC10	-0.281455	0.00928	0.0667	-0.124509	0.0238	0.0874
PLCL1	-0.699137	0.00992	0.07	-0.606204	0.0353	0.118
ZDHHC9	-0.431925	0.01	0.0703	-0.236653	0.0172	0.0681
SOCS3	-0.660622	0.01	0.0704	-0.501934	6.21e-07	1.04e-05
TCEAL9	-0.723055	0.0104	0.0724	-0.698081	0.00293	0.0162
FAM72C	-1.13034	0.0105	0.073	-0.399914	0.0098	0.0435
RAB13	-0.774432	0.0106	0.0736	-0.980932	3.59e-14	2.01e-12
RPA3	-0.351485	0.0114	0.0772	-0.282648	2.68e-05	0.000299
IL22RA2	-1.94625	0.0116	0.0779	-1.34967	0.000287	0.00232
SMAD3	-1.07114	0.0121	0.0808	-3.5029	1.23e-05	0.000152
LANCL3	-1.82726	0.0122	0.0812	-0.94882	6.7e-05	0.000665
ARL4A	-0.371436	0.0124	0.082	-0.275836	0.000346	0.00271
TMEM192	-0.222005	0.0124	0.082	-0.24288	1.27e-05	0.000156
PREX2	-0.728103	0.0125	0.0825	-0.740896	0.00264	0.0148
ZNF880	-0.861897	0.0132	0.086	-0.825127	0.0241	0.088
TMEM70	-0.269257	0.0135	0.0874	-0.226967	0.0139	0.0574
CSRNP3	-1.78393	0.0137	0.0883	-2.87408	4.11e-05	0.000435
CCSER1	-0.609239	0.0139	0.0893	-0.67049	0.00159	0.00974
CMPK1	-0.231709	0.0141	0.0898	-0.10764	0.00707	0.0333
FAM122B	-0.418301	0.0149	0.093	-0.0809705	0.0432	0.136
ADAM23	-0.714083	0.0171	0.103	-1.06562	7.39e-09	1.84e-07
NAA30	-0.295111	0.0173	0.104	-0.163034	0.0435	0.136
PTP4A1	-0.509177	0.0182	0.107	-0.109924	0.048	0.147
APP	-0.164381	0.0182	0.107	-0.238404	0.0145	0.0594
CD68	-0.22068	0.0184	0.108	-0.768895	0.00974	0.0433
TAF1D	-0.184831	0.0185	0.109	-0.188966	5.5e-05	0.000558
FJX1	-1.30078	0.0188	0.11	-1.56392	1.89e-13	9.86e-12
AMPD3	-0.132784	0.0189	0.11	-0.0704211	0.0278	0.0982
RAP2B	-0.170419	0.0189	0.11	-0.635566	3.36e-08	7.37e-07
VEGFB	-0.254971	0.019	0.111	-0.196605	0.0138	0.0572
MATK	-1.84661	0.0191	0.111	-1.45729	1.88e-06	2.83e-05
CDPF1	-0.536433	0.0196	0.113	-0.363729	6.5e-05	0.000648
CUEDC1	-0.195808	0.0208	0.119	-0.273443	0.0196	0.0752
TMEM230	-0.180752	0.021	0.119	-0.0596895	0.0249	0.0905
ALG1	-0.181997	0.0212	0.12	-0.118128	0.0286	0.1
YIPF5	-0.218279	0.0213	0.12	-0.224277	0.00312	0.0171
PIGA	-0.393522	0.0219	0.123	-0.441216	5.65e-07	9.55e-06
SPAG16	-0.699305	0.0223	0.124	-0.183658	0.0252	0.0911
ARHGEF5	-1.92843	0.0226	0.125	-2.3718	2.89e-12	1.26e-10
COL6A1	-1.64174	0.0233	0.128	-3.25291	7.4e-80	2.01e-76
TMEM138	-0.241559	0.0236	0.129	-0.795586	1.03e-21	1.32e-19
TDRD6	-3.62049	0.0236	NA	-1.55083	3.96e-18	3.77e-16
PRKCH	-0.867653	0.024	0.131	-0.331124	0.0354	0.118
LAS1L	-0.221537	0.0243	0.132	-0.132123	0.000789	0.00538
CTSC	-0.0817281	0.0244	0.132	-0.350455	1.87e-05	0.000218
STARD13	-0.398977	0.0255	0.136	-1.59457	8.93e-05	0.000857
CD109	-1.5359	0.0256	0.136	-3.6579	9.38e-08	1.88e-06
ASRGL1	-0.712991	0.0259	0.138	-0.795153	0.000191	0.00163
DUSP14	-0.427962	0.0262	0.139	-0.155054	0.0206	0.0781
FUT4	-0.270814	0.0264	0.139	-0.188897	0.00717	0.0337
FLNB	-0.361659	0.0265	0.139	-0.467657	2.12e-06	3.17e-05
ZFPM1	-0.559215	0.027	0.141	-1.43422	0.0309	0.107
CREM	-0.292696	0.0278	0.145	-0.317419	0.0047	0.0238
TGM5	-1.40433	0.0281	0.146	-1.08678	2.78e-40	2.23e-37
CNIH1	-0.218676	0.0283	0.146	-0.126665	0.0315	0.108
PDGFA	-0.433398	0.0284	0.147	-1.52969	8.35e-42	7.57e-39
SOX4	-0.532881	0.0288	0.148	-0.432595	0.0116	0.0496
DDIT4L	-0.696252	0.0292	0.15	-2.08919	6.81e-40	4.87e-37
ABCB1	-4.3935	0.0294	NA	-1.80273	0.00185	0.011
AP1B1	-0.115577	0.0296	0.151	-0.219551	0.00211	0.0123
AC087721.2	-2.3058	0.0302	NA	-0.167953	3.34e-05	0.000363
DAB1	-1.499	0.0309	0.155	-1.74779	1.03e-14	6.2e-13
RER1	-0.15323	0.0316	0.157	-0.149651	0.00589	0.0287
SPART	-0.165453	0.032	0.158	-0.177137	0.0408	0.131
SLC4A7	-0.143506	0.0321	0.159	-0.181941	3.17e-05	0.000346
ASB2	-0.659595	0.0325	0.16	-0.116116	0.0175	0.0689
SYNM	-0.967002	0.0326	0.16	-0.308968	0.0276	0.0978
LRRC8B	-0.170344	0.0331	0.162	-0.278179	0.000227	0.0019
VTA1	-0.173385	0.0333	0.163	-0.157556	1.13e-05	0.000142
LGALS3BP	-0.860778	0.0348	0.167	-0.938687	0.000132	0.0012
PHLDB1	-0.518731	0.0363	0.173	-0.486439	9.72e-05	0.000921
TPCN1	-0.114616	0.0367	0.174	-0.188038	0.00224	0.013
SOAT1	-0.139454	0.0375	0.177	-0.354967	0.000407	0.00308
AQP9	-3.3677	0.0378	NA	-2.69569	6.09e-07	1.02e-05
ELOB	-0.176041	0.0386	0.18	-0.0809753	0.0476	0.146
ITGA7	-0.410745	0.039	0.181	-1.0225	0.0116	0.0498
E2F3	-0.217935	0.0393	0.182	-0.274848	1.86e-05	0.000218
RASA1	-0.168429	0.0403	0.186	-0.199683	0.00197	0.0116
WIPF1	-0.16214	0.0404	0.186	-0.109668	0.0327	0.111
RBMX	-0.0871193	0.0408	0.187	-0.111228	0.0016	0.00979
TMEM255A	-1.65308	0.0413	0.188	-1.4563	2.28e-17	1.9e-15
PTAR1	-0.171884	0.0416	0.189	-0.170083	0.00597	0.029
FCRLB	-0.970769	0.0426	0.192	-0.68575	0.00583	0.0284
ARHGAP24	-1.2358	0.0445	0.198	-1.12217	0.00616	0.0298
VAT1	-0.254657	0.0445	0.198	-0.572823	0.0305	0.106
SRM	-0.249391	0.0448	0.199	-0.480574	0.0342	0.115
RAB5A	-0.149437	0.0453	0.2	-0.228824	0.0347	0.116
GPNMB	-0.745253	0.0453	0.2	-2.80895	2.01e-144	1.37e-140
DNAJC10	-0.123553	0.0457	0.201	-0.121891	1.87e-05	0.000218
ELL2	-0.427424	0.0464	0.203	-1.46059	1.42e-06	2.23e-05
C7orf50	-0.277746	0.0473	0.206	-0.63273	1.29e-11	5.07e-10
VPS13A	-0.198053	0.0483	0.209	-0.178706	0.0294	0.103
NKIRAS1	-0.348971	0.0483	0.209	-0.180873	0.0278	0.0984
ADARB1	-0.48426	0.0492	0.211	-1.15276	2.41e-17	1.98e-15
APBB3	1.39958	1.68e-83	4.36e-80	0.483158	4.34e-06	6.06e-05
TENM4	3.56707	8.43e-54	8.74e-51	0.414842	0.02	0.0765
CLSTN3	1.56512	3e-27	1.14e-24	0.397838	0.000617	0.0044
C1orf162	0.998995	6.94e-25	2.35e-22	1.12063	5.36e-05	0.000547
F13A1	5.44731	1.03e-23	3.07e-21	1.66853	0.0395	0.127
ASGR2	0.384128	1.03e-21	2.63e-19	0.872555	2.44e-05	0.000275
SLC29A1	0.549058	2.41e-21	5.94e-19	0.627174	2.64e-23	4.22e-21
AOAH	0.634722	1.69e-18	3.47e-16	0.315855	0.000133	0.0012
CD101	0.641835	6.09e-18	1.18e-15	0.414996	3.83e-09	1e-07
SRA1	0.527012	1.82e-16	3.08e-14	0.364629	6.06e-06	8.07e-05
MYO1G	0.445995	1.42e-15	2.24e-13	0.865006	0.00522	0.0259
WSB1	0.326931	1.67e-15	2.55e-13	0.158905	2.51e-05	0.000283
DHTKD1	0.374268	4.16e-15	6.05e-13	0.665499	0.0406	0.13
S100B	0.468724	2.36e-13	2.74e-11	0.382573	0.00169	0.0103
PSMC4	0.455107	4.13e-13	4.62e-11	0.26558	0.000193	0.00164
YWHAH	0.346377	2.4e-12	2.41e-10	0.240925	0.0286	0.1
HLA-DQB2	4.60176	6.11e-12	5.77e-10	0.643619	0.00262	0.0147
NPIPB5	1.18793	1.62e-11	1.44e-09	0.241676	0.00233	0.0134
STK32C	0.682983	1.77e-11	1.56e-09	0.581885	6.46e-07	1.07e-05
FNBP1	0.346473	3.54e-11	2.91e-09	0.277532	0.00148	0.00915
MKNK1	0.290835	7e-11	5.5e-09	0.126961	0.0245	0.0894
NPIPB15	8.18377	1.31e-10	9.74e-09	0.398123	0.000597	0.00429
AHRR	0.509879	1.57e-10	1.15e-08	0.359247	0.0287	0.101
FXYD5	0.866314	1.65e-10	1.2e-08	0.121215	0.0209	0.079
SFMBT2	0.298192	3.08e-10	2.16e-08	0.420614	1.07e-13	5.71e-12
SIRPB2	0.559095	5.17e-10	3.53e-08	0.476451	1.58e-06	2.44e-05
GPR160	0.903247	5.83e-10	3.91e-08	1.15756	2.9e-08	6.49e-07
SPATA13	0.404179	1.21e-09	7.71e-08	0.215269	2.16e-07	4.05e-06
ARHGAP9	0.323915	2.58e-09	1.58e-07	0.304986	2.42e-08	5.58e-07
PLAC8	0.264452	4.1e-09	2.38e-07	0.678966	1.23e-62	1.86e-59
GRAMD2B	0.655355	4.32e-09	2.5e-07	0.202089	0.0033	0.0178
GANC	0.499728	6.78e-09	3.74e-07	0.142908	0.0125	0.0528
KDM5D	19.7234	9.29e-09	4.99e-07	0.224929	0.0139	0.0574
NCF4	0.221502	9.79e-09	5.22e-07	0.254888	0.0308	0.107
FKBP1B	0.856376	1.04e-08	5.53e-07	0.554822	5.89e-05	0.000593
ADGRG1	0.41373	1.65e-08	8.39e-07	0.888275	5.51e-09	1.4e-07
GRK5	1.00183	1.76e-08	8.88e-07	0.415318	0.00011	0.00102
USP7	0.328483	2.24e-08	1.1e-06	0.069573	0.00674	0.032
DGKD	0.378807	5.9e-08	2.65e-06	0.336801	0.000133	0.0012
CARD9	0.418581	8.69e-08	3.71e-06	0.533293	1.29e-05	0.000158
RETN	0.793834	1.03e-07	4.31e-06	0.925476	0.00127	0.00807
HEG1	0.480962	1.68e-07	6.68e-06	0.282829	0.000337	0.00265
FOSB	1.0393	2.19e-07	8.51e-06	1.00023	0.0197	0.0754
HAUS4	0.311102	4e-07	1.47e-05	0.0768993	0.00754	0.035
RGS18	0.492155	4.01e-07	1.47e-05	1.04112	0.000109	0.00102
PCNX1	0.383395	4.11e-07	1.5e-05	0.223441	4.69e-07	8.1e-06
MDM4	0.277955	5.26e-07	1.88e-05	0.221451	0.0284	0.0998
TMCO6	0.819713	6.67e-07	2.32e-05	0.166352	0.000571	0.00414
TRIB2	1.00796	7.1e-07	2.44e-05	0.558684	9.49e-08	1.89e-06
ECH1	0.4667	1.12e-06	3.65e-05	0.137082	0.0139	0.0576
RNF24	0.502099	1.73e-06	5.34e-05	0.252534	0.0146	0.0599
PAQR5	0.506486	3.98e-06	0.000113	0.334372	0.00102	0.0067
ZFP36L1	0.342647	5.17e-06	0.000141	0.300385	2.45e-08	5.63e-07
NBPF12	0.355409	5.79e-06	0.000156	0.214276	0.000399	0.00303
GSDMD	0.3826	6.64e-06	0.000176	0.14266	0.0349	0.117
ACAP1	0.382346	8.4e-06	0.000214	0.606391	9.87e-05	0.000929
TLE4	0.354052	1.14e-05	0.000278	0.323214	3.56e-07	6.3e-06
TBC1D3L	1.03559	1.15e-05	0.000279	0.486712	2.6e-15	1.75e-13
DNAJC13	0.297525	1.24e-05	0.000294	0.791328	1.42e-05	0.000171
ST14	0.283697	1.34e-05	0.000317	1.30699	0.00015	0.00133
REEP1	0.465586	1.61e-05	0.000375	0.288926	0.00937	0.0419
PPP1R21	0.437274	1.76e-05	0.000404	0.240223	0.0263	0.0942
PSTPIP2	0.308568	2.14e-05	0.000477	0.480286	0.000168	0.00146
SLC12A8	0.983644	2.18e-05	0.000485	0.646428	1.6e-22	2.24e-20
MEFV	0.30604	3.01e-05	0.000638	1.30916	4.01e-16	2.9e-14
ABCG1	0.767547	3.34e-05	0.000698	0.713378	0.000365	0.00282
SULT4A1	5.37999	3.58e-05	0.000738	0.771892	0.00661	0.0316
ZDHHC3	0.245027	4.62e-05	0.000927	0.246731	0.0234	0.0864
TESC	0.350793	4.95e-05	0.000985	0.444249	0.00214	0.0125
TACSTD2	0.318519	6.87e-05	0.00131	1.26555	2.35e-17	1.95e-15
COLGALT1	0.210111	7.1e-05	0.00135	0.157483	0.000718	0.00497
ITGAL	0.180609	7.44e-05	0.0014	0.381877	4.08e-07	7.13e-06
AXL	0.356092	9.36e-05	0.00171	0.369172	0.00157	0.00965
ADAM19	0.954141	9.75e-05	0.00177	1.38693	5.45e-14	3.02e-12
SMOX	0.257634	9.76e-05	0.00177	0.320861	0.00389	0.0203
TES	0.26509	0.000109	0.00194	0.425458	0.0176	0.0693
SEMA4A	0.820149	0.000116	0.00205	0.302159	0.000186	0.0016
CLEC5A	0.544342	0.000151	0.00256	0.762702	0.000536	0.00394
IL1RN	0.40173	0.000157	0.00264	0.770911	0.000512	0.00378
HDAC1	0.234448	0.000175	0.0029	0.235259	0.000422	0.00319
SEMA4C	0.213454	0.000181	0.00296	0.414959	0.000136	0.00122
TBC1D10C	0.397046	0.000186	0.00303	0.396664	0.00145	0.00903
HLA-DQB1	0.779132	0.000191	0.00309	0.629499	8.24e-09	2.03e-07
CHD2	0.187553	0.0002	0.0032	0.217991	0.0101	0.0447
PLEKHA5	0.801775	0.000225	0.00353	0.21427	0.0395	0.127
KCNQ1	0.396693	0.000237	0.00368	0.72767	0.00546	0.0269
RNPEP	0.272395	0.000271	0.0041	0.2462	0.00894	0.0403
ZNF689	0.183443	0.000337	0.00493	0.241357	3.5e-09	9.25e-08
LRRFIP1	0.224464	0.000347	0.00505	0.106349	0.0244	0.0891
SRRM2	0.21277	0.000363	0.00524	0.293368	1.37e-07	2.68e-06
SLC25A3	0.152746	0.000372	0.00535	0.0855388	0.0156	0.0632
C5AR1	0.294612	0.000468	0.00644	0.486048	0.00606	0.0294
LMO7	0.286209	0.000472	0.00648	0.290902	4.98e-13	2.44e-11
TNFRSF13C	1.52673	0.000507	0.00684	1.23938	3.84e-09	1.01e-07
FAM149A	0.410824	0.000563	0.00745	1.73102	4.62e-06	6.38e-05
ZNF780A	0.220696	0.000574	0.00755	0.171315	0.0483	0.148
CEBPZ	0.293096	0.000578	0.00759	0.507823	0.039	0.126
PPA1	0.368075	0.000591	0.00775	1.01667	0.0353	0.118
SIPA1L1	0.255933	0.000604	0.00791	0.165665	0.0087	0.0394
IMPA2	0.687043	0.000689	0.00884	0.590118	0.0087	0.0394
RAC1	0.134922	0.000696	0.00891	0.226007	0.0157	0.0634
ATM	0.172427	0.000703	0.00897	0.220122	0.00103	0.00676
FUT7	0.475722	0.000736	0.00931	1.37325	0.00148	0.00917
PTPN13	0.460249	0.000803	0.00999	0.265749	0.0437	0.137
CLNS1A	0.218059	0.000875	0.0107	0.113156	0.00143	0.00895
BCL2L13	0.2397	0.000903	0.0109	0.103367	0.00102	0.0067
SLCO4A1	0.387718	0.000982	0.0117	0.348915	0.00704	0.0332
MPP3	0.731669	0.000991	0.0118	0.800748	0.0138	0.057
ELF2	0.214956	0.00103	0.0121	0.145791	0.00497	0.0249
CRAT	0.362954	0.00106	0.0124	0.336096	0.0252	0.0911
TSPAN14	0.136675	0.0012	0.0137	0.230142	0.0111	0.0479
CTTNBP2	0.283924	0.00129	0.0145	0.742802	0.00011	0.00102
MMP25	0.758725	0.00164	0.0176	0.701884	0.00077	0.00527
NOL4L	0.267414	0.00165	0.0176	0.146789	0.0345	0.116
CCDC86	0.338803	0.0017	0.018	0.647532	7.24e-06	9.49e-05
SPINT1	0.307705	0.00177	0.0186	0.531519	1.06e-05	0.000134
RUFY3	0.233962	0.0022	0.0221	0.259593	7.63e-05	0.000745
BRD2	0.139153	0.00235	0.0233	0.132731	0.00581	0.0284
GABRE	0.292483	0.00237	0.0234	0.699558	9.96e-07	1.61e-05
IDH3B	0.171931	0.0025	0.0246	0.145619	0.0327	0.111
ZXDC	0.229479	0.00253	0.0247	0.102531	0.025	0.0908
CD86	0.173962	0.00263	0.0255	0.221525	0.0232	0.0857
IRF9	0.285162	0.00309	0.0291	0.181598	0.000154	0.00136
GRAMD4	0.626435	0.00315	0.0294	0.630109	0.0002	0.0017
MAN2A2	0.303079	0.0033	0.0305	0.508419	6.9e-06	9.1e-05
CHST13	1.57645	0.00333	0.0307	0.665339	0.00483	0.0243
MARVELD2	1.46155	0.00334	0.0307	0.778227	0.0212	0.08
AC020915.5	4.46153	0.00339	0.0311	0.523216	0.0165	0.0658
ARPIN	0.398499	0.0035	0.0319	0.428264	0.000151	0.00134
ENPP2	0.630729	0.00355	0.0322	0.341679	0.0163	0.0655
HGSNAT	0.203315	0.00373	0.0336	0.316146	0.000404	0.00307
IVNS1ABP	0.16746	0.00439	0.0381	0.323476	0.000247	0.00204
RING1	0.319973	0.00456	0.0392	0.223481	5.49e-05	0.000558
SELPLG	0.188921	0.00458	0.0394	0.522684	1.35e-24	2.41e-22
AC011511.1	1.2455	0.0046	0.0394	0.368754	0.0186	0.0722
GPR27	2.12596	0.00468	0.04	0.835823	1.42e-06	2.24e-05
NUP98	0.156062	0.00472	0.0402	0.228013	0.017	0.0676
YY1AP1	0.189509	0.00473	0.0403	0.130067	0.000649	0.00459
ASGR1	1.26001	0.00473	0.0403	0.534099	0.0109	0.0475
LRRC37B	0.442798	0.00485	0.0411	0.195104	0.0099	0.0439
SON	0.156882	0.00488	0.0413	0.134191	0.000679	0.00476
UPK3BL1	0.838224	0.00498	0.0419	0.312011	0.0182	0.0711
KMT2C	0.195777	0.0055	0.0453	0.199794	0.000491	0.00364
CARD16	0.714455	0.00555	0.0456	0.153784	0.036	0.119
MEF2A	0.116753	0.00556	0.0456	0.0997728	0.0249	0.0903
ADD1	0.127652	0.00561	0.046	0.158004	7.45e-06	9.75e-05
MTUS1	0.126788	0.00618	0.0495	0.120939	0.00932	0.0418
TMTC2	0.592441	0.00633	0.0504	1.93343	0.00672	0.032
POLR2J3	1.87725	0.00652	0.0517	0.102505	0.0198	0.0756
PANK1	0.397193	0.00662	0.0522	0.19528	0.000331	0.00261
RHPN2	0.370594	0.00665	0.0523	0.375724	0.0143	0.0588
TAL1	0.146409	0.00673	0.0528	0.407406	8.9e-08	1.79e-06
EIF3L	0.115822	0.00681	0.0532	0.230531	2.6e-07	4.76e-06
EXOSC10	0.204249	0.00694	0.054	0.263402	0.000362	0.00281
AGPAT3	0.144412	0.0076	0.0577	0.274562	2.12e-07	3.99e-06
ZNF106	0.0956983	0.0076	0.0577	0.0858823	0.028	0.0987
TMEM71	0.530197	0.00801	0.0601	0.718916	1.27e-12	5.8e-11
PTPN18	0.170521	0.00803	0.0602	0.191042	1.6e-05	0.00019
EXOC3	0.137971	0.00806	0.0603	0.344895	0.00093	0.00619
ACSS2	0.266362	0.00815	0.0608	0.479428	2.49e-08	5.68e-07
USP4	0.179884	0.00866	0.0635	0.107134	0.000187	0.0016
STIMATE-MUSTN1	0.804215	0.00902	0.0655	0.187215	0.0337	0.114
CCR2	0.403899	0.00917	0.0662	0.963807	6.53e-37	3.17e-34
RPL4	0.115088	0.00955	0.068	0.0926017	0.00153	0.00944
RCAN3	0.319081	0.00963	0.0685	0.87459	1.39e-05	0.000169
RBM39	0.11112	0.00989	0.07	0.102063	0.00614	0.0297
INSIG2	0.313159	0.00994	0.0701	0.454334	0.00156	0.00961
GNB5	0.288897	0.00997	0.0702	0.479294	0.00186	0.0111
SYT6	0.243123	0.00997	0.0702	0.267868	2.53e-05	0.000284
GAS2L3	0.21511	0.0109	0.0752	0.144151	0.00228	0.0131
FZD1	0.407078	0.0119	0.0798	0.519751	0.0017	0.0103
DHRS1	0.329146	0.012	0.0801	0.334506	0.000549	0.00401
TMEM65	0.230233	0.0127	0.0834	0.258666	0.000213	0.00179
TRPV2	0.199285	0.0127	0.0836	0.372526	0.000334	0.00263
CTNNA1	0.0906545	0.0133	0.0864	0.435629	0.000365	0.00282
MBD6	0.513591	0.0134	0.0868	0.517886	2.11e-06	3.15e-05
HP1BP3	0.117984	0.0145	0.0913	0.140174	0.0027	0.0151
PFKP	0.260569	0.015	0.0937	0.274343	2.08e-06	3.12e-05
BICD1	0.469377	0.0153	0.095	0.208421	0.0123	0.0521
WDR41	0.201676	0.0156	0.0964	0.20033	0.00482	0.0243
ALOX5AP	0.247511	0.0157	0.0968	0.276693	2.33e-05	0.000264
TESMIN	1.08973	0.0162	0.099	0.587838	0.0148	0.0606
NEIL1	0.306242	0.0162	0.099	0.619118	1.58e-10	5.23e-09
TMEM169	0.420181	0.0164	0.0997	0.246377	0.0291	0.102
DENND4B	0.176543	0.0172	0.103	0.219846	5.98e-05	0.0006
OGT	0.17661	0.0173	0.104	0.351185	3.95e-05	0.000421
ELMSAN1	0.121478	0.0174	0.104	0.231343	2.56e-05	0.000287
ATP11A	0.214299	0.0176	0.105	0.173518	0.0419	0.133
ABCC6	0.377535	0.0179	0.106	0.555356	1.02e-20	1.22e-18
OLFML3	0.0850793	0.018	0.107	0.332403	1.18e-14	7e-13
RIN1	0.516925	0.0181	0.107	1.00493	2.97e-05	0.000327
RBM6	0.141597	0.0185	0.108	0.124668	0.0102	0.0449
RUNX1	0.278025	0.019	0.111	0.25919	0.012	0.0508
GOLGA8A	0.283261	0.0198	0.114	0.1749	0.0137	0.0568
DOCK5	0.163366	0.021	0.119	0.232508	0.0463	0.143
COPS5	0.160245	0.0212	0.12	0.191863	0.016	0.0643
ZNF217	0.128514	0.0212	0.12	0.306753	3.24e-14	1.83e-12
NBPF19	0.286759	0.0213	0.12	0.250001	0.00628	0.0303
HIPK1	0.105069	0.0216	0.121	0.0845236	0.0254	0.0917
MAP2K1	0.117121	0.0226	0.125	0.247193	0.00259	0.0146
ZNF641	0.166442	0.0229	0.126	0.403689	3.4e-09	9.05e-08
SMURF1	0.149063	0.0229	0.126	0.169505	1.5e-05	0.00018
MTMR3	0.123646	0.0245	0.133	0.162355	0.00105	0.00686
FGR	0.153293	0.0246	0.133	0.794051	1.08e-06	1.74e-05
CASC3	0.178035	0.0247	0.133	0.188127	0.0123	0.0521
CITED2	0.264241	0.0248	0.134	0.350335	0.0116	0.0498
BIN2	0.146178	0.0252	0.135	0.442236	7.16e-27	1.6e-24
PCMT1	0.170298	0.0253	0.135	0.121935	0.00084	0.00568
GNPAT	0.154919	0.0265	0.139	0.470563	0.000632	0.0045
CACNB1	1.02139	0.0266	0.14	0.969	4.81e-13	2.36e-11
ARHGAP21	0.274436	0.0266	0.14	0.536054	5.36e-09	1.37e-07
RAB34	0.594048	0.0273	0.143	0.796821	2.85e-08	6.4e-07
ARHGEF16	1.15347	0.0274	0.143	0.729647	0.0346	0.116
LRIF1	0.223061	0.0277	0.144	0.188041	0.028	0.0987
ARRDC1	0.240988	0.028	0.145	0.333268	1.36e-05	0.000166
PRAM1	0.209618	0.028	0.145	0.135736	0.011	0.0478
ARPC3	0.0998647	0.0292	0.15	0.550991	0.00956	0.0427
TMC8	0.149995	0.0298	0.152	0.147844	0.0224	0.0834
CCR6	0.262826	0.0306	0.154	0.263708	1.42e-05	0.000171
ZCCHC8	0.180675	0.0313	0.156	0.0994093	0.00158	0.00968
PRDX2	0.195944	0.0314	0.157	0.416945	0.0198	0.0756
SLTM	0.13366	0.0317	0.157	0.135675	0.0436	0.137
SSR1	0.132293	0.032	0.158	0.0999125	0.0147	0.0601
RPS6	0.0968053	0.0321	0.159	0.083075	0.0382	0.124
PPIL3	0.542756	0.0327	0.16	0.446912	3.57e-11	1.29e-09
PNPLA7	0.900069	0.0335	0.163	0.794019	0.0274	0.0974
MACF1	0.0829978	0.0341	0.165	0.209169	0.0139	0.0575
RASAL1	0.159989	0.0357	0.17	0.295791	0.00554	0.0272
FAM219B	0.134229	0.0358	0.171	0.349331	9.49e-13	4.42e-11
CMTR1	0.131415	0.0365	0.173	0.214683	0.00528	0.0261
INPP5B	0.156565	0.0367	0.174	0.178548	0.00156	0.00958
ABCC1	0.171029	0.0368	0.174	0.29202	0.0049	0.0246
TRIM36	0.160414	0.0369	0.174	0.383573	4.17e-09	1.08e-07
CACNB4	0.29052	0.0375	0.177	0.260717	0.0436	0.137
DPF2	0.222871	0.0384	0.179	0.186174	0.00527	0.0261
DHCR7	0.200617	0.0385	0.179	0.234555	9.11e-06	0.000117
FRMD4A	0.124184	0.0387	0.18	0.187094	0.0257	0.0924
ZNF266	0.177991	0.0396	0.183	0.111023	0.0131	0.0546
NECAB3	0.264933	0.0401	0.185	0.132781	0.0369	0.121
MOB3C	0.13757	0.0403	0.186	0.204579	0.0105	0.046
TMEM131	0.145072	0.0413	0.188	0.340475	0.0217	0.0814
MYO1F	0.0991314	0.0417	0.19	0.185394	3.16e-08	6.98e-07
DDX5	0.0654271	0.0419	0.19	0.177388	0.000759	0.00521
MSS51	0.556628	0.0421	0.191	1.56634	0.0413	0.132
PIH1D1	0.165246	0.0422	0.191	0.281513	1.77e-07	3.37e-06
LGALS1	0.119411	0.0423	0.191	0.330475	0.000689	0.00482
ARHGAP22	0.194026	0.0427	0.192	0.648927	2.81e-06	4.08e-05
TUT4	0.165066	0.0432	0.194	0.256072	1.75e-05	0.000207
ASH1L	0.146972	0.0437	0.195	0.193701	0.0434	0.136
TNS1	0.725497	0.0447	0.198	0.868902	0.0203	0.0774
TRPC4AP	0.130891	0.0454	0.2	0.165048	0.0182	0.0709
POGZ	0.170418	0.0468	0.204	0.189243	2.78e-05	0.000308
FAM118A	0.676084	0.0468	0.204	0.456784	3.25e-33	1.26e-30
C1RL	0.178044	0.0484	0.209	0.359506	0.0075	0.0349
AHCYL1	0.0919332	0.0491	0.211	0.362778	0.00416	0.0215
SEMA4D	0.255161	0.0492	0.211	0.0892056	9.92e-05	0.000933
ATP5PD	0.129666	0.0495	0.212	0.175353	0.0461	0.143
PHC2	0.135337	0.0496	0.212	0.228561	0.01	0.0444
RASA4	1.69017	0.0498	0.212	0.457719	6.38e-10	1.92e-08

## Sheet: Table S6
Supplemental Table 6: Differential gene expression between PLOSL and control brains
Gene List	Log2 fold change	std error (log2)	Lower confidence limit (log2)	Upper confidence limit (log2)	Linear fold change	Lower confidence limit (linear)	Upper confidence limit (linear)	P value	BY P value
IL8	3.95	0.677	2.62	5.28	15.5	6.17	38.8	6.86e-07	0.00102
CD99	1.37	0.239	0.903	1.84	2.59	1.87	3.58	9.36e-07	0.00102
JAK2	0.655	0.109	0.442	0.868	1.57	1.36	1.83	3.58e-07	0.00102
PRKCE	-1.62	0.299	-2.21	-1.04	0.325	0.216	0.488	2.71e-06	0.0022
STAT2	1.35	0.256	0.845	1.85	2.54	1.8	3.6	4.56e-06	0.00297
OLR1	1.91	0.387	1.15	2.67	3.76	2.22	6.35	1.29e-05	0.00701
CTSS	1.95	0.404	1.15	2.74	3.85	2.23	6.67	1.93e-05	0.00896
REPS1	1.08	0.231	0.623	1.53	2.11	1.54	2.88	3.16e-05	0.0103
ANP32B	0.919	0.197	0.533	1.3	1.89	1.45	2.47	3.08e-05	0.0103
DUSP4	-2.19	0.47	-3.11	-1.27	0.219	0.116	0.415	3.17e-05	0.0103
GNLY	2.59	0.57	1.47	3.71	6.02	2.78	13.1	4.58e-05	0.0107
IL18	2.08	0.457	1.19	2.98	4.24	2.28	7.89	4.44e-05	0.0107
PTPRC	2.05	0.449	1.17	2.93	4.14	2.25	7.62	4.3e-05	0.0107
KIT	-1.54	0.337	-2.2	-0.88	0.344	0.217	0.543	4.29e-05	0.0107
CYFIP2	-0.994	0.232	-1.45	-0.54	0.502	0.366	0.688	0.000104	0.0226
HLA-DPB1	1.87	0.442	1	2.74	3.66	2.01	6.67	0.000123	0.0251
ATP6AP2	-0.85	0.203	-1.25	-0.452	0.555	0.421	0.731	0.000144	0.0275
SELPLG	2.24	0.54	1.19	3.3	4.74	2.27	9.87	0.000156	0.0282
ITGAX	1.88	0.462	0.97	2.78	3.67	1.96	6.88	0.000211	0.0295
INPP5D	1.64	0.404	0.844	2.43	3.11	1.8	5.37	0.000214	0.0295
HLA-DRA	1.53	0.376	0.797	2.27	2.9	1.74	4.83	0.000197	0.0295
SYK	1.53	0.378	0.789	2.27	2.89	1.73	4.83	0.000218	0.0295
EP300	0.375	0.0926	0.193	0.557	1.3	1.14	1.47	0.000218	0.0295
IL12RB2	-2.05	0.502	-3.04	-1.07	0.241	0.122	0.476	0.000191	0.0295
S100A8	2.8	0.702	1.42	4.17	6.96	2.68	18.1	0.000264	0.0314
C3	2.12	0.529	1.08	3.16	4.34	2.12	8.92	0.000249	0.0314
CD86	2.1	0.529	1.06	3.14	4.29	2.09	8.8	0.000273	0.0314
C1QBP	-0.592	0.149	-0.884	-0.299	0.663	0.542	0.813	0.00028	0.0314
MAP2K1	-1.06	0.267	-1.59	-0.54	0.478	0.333	0.688	0.000267	0.0314
LRP1	0.532	0.135	0.267	0.797	1.45	1.2	1.74	0.000312	0.0338
CSF3R	1.85	0.478	0.917	2.79	3.61	1.89	6.92	0.000363	0.0382
MSR1	2.06	0.541	1	3.12	4.17	2	8.7	0.000451	0.0423
TNFAIP3	1.85	0.485	0.899	2.8	3.6	1.86	6.96	0.000441	0.0423
S100B	1.25	0.325	0.608	1.88	2.37	1.52	3.69	0.000422	0.0423
IFNGR1	1.24	0.326	0.6	1.88	2.36	1.52	3.67	0.000456	0.0423
IL6ST	0.529	0.139	0.256	0.802	1.44	1.19	1.74	0.000468	0.0423
CD200	-0.877	0.236	-1.34	-0.414	0.545	0.395	0.751	0.000597	0.0525
CD84	1.76	0.479	0.819	2.69	3.38	1.76	6.47	0.000677	0.058
HAVCR2	1.57	0.437	0.712	2.43	2.97	1.64	5.37	0.000859	0.0717
SMPD3	-1.32	0.369	-2.04	-0.597	0.401	0.243	0.661	0.000887	0.0722
IRF8	1.4	0.395	0.626	2.17	2.64	1.54	4.51	0.000976	0.074
MPPED1	-1.25	0.352	-1.94	-0.561	0.421	0.261	0.678	0.000952	0.074
TPSAB1	-2.17	0.613	-3.38	-0.972	0.222	0.0964	0.51	0.000977	0.074
PSMD7	-0.626	0.177	-0.974	-0.278	0.648	0.509	0.825	0.00103	0.0763
LRRN3	-0.95	0.271	-1.48	-0.418	0.518	0.358	0.748	0.00111	0.0805
CD46	0.842	0.244	0.365	1.32	1.79	1.29	2.5	0.00126	0.0891
LTF	2.56	0.742	1.1	4.02	5.9	2.15	16.2	0.0013	0.0898
CX3CR1	1.53	0.452	0.641	2.41	2.88	1.56	5.33	0.00158	0.103
BCL2L1	-0.385	0.114	-0.608	-0.162	0.766	0.656	0.894	0.00159	0.103
MAP2K4	-1.04	0.307	-1.64	-0.436	0.487	0.321	0.739	0.00157	0.103
LY86	1.85	0.563	0.75	2.96	3.62	1.68	7.77	0.00202	0.129
MERTK	1.45	0.442	0.586	2.32	2.74	1.5	4.99	0.00206	0.129
IL6R	1.37	0.422	0.539	2.19	2.58	1.45	4.57	0.00235	0.137
TLR4	0.797	0.246	0.315	1.28	1.74	1.24	2.43	0.00233	0.137
IL34	-0.806	0.248	-1.29	-0.319	0.572	0.408	0.801	0.0023	0.137
PNMA1	-0.824	0.254	-1.32	-0.326	0.565	0.4	0.797	0.00229	0.137
CR1	1.76	0.548	0.69	2.84	3.4	1.61	7.15	0.00248	0.139
IFI16	0.992	0.308	0.388	1.6	1.99	1.31	3.02	0.00248	0.139
NEFL	-1.62	0.503	-2.6	-0.629	0.326	0.165	0.646	0.00254	0.14
NLRP2	-1.6	0.505	-2.59	-0.615	0.329	0.166	0.653	0.00278	0.15
CHIT1	-1.85	0.582	-2.99	-0.707	0.278	0.126	0.612	0.0028	0.15
S100A12	2.59	0.833	0.955	4.22	6.01	1.94	18.6	0.00339	0.178
C3AR1	1.24	0.402	0.446	2.02	2.35	1.36	4.07	0.00375	0.194
APP	-0.542	0.177	-0.889	-0.195	0.687	0.54	0.874	0.00385	0.196
C1QB	1.15	0.378	0.409	1.89	2.22	1.33	3.71	0.00403	0.202
TLR3	1.81	0.602	0.627	2.99	3.5	1.54	7.92	0.0045	0.219
FCGR2A	1.13	0.376	0.393	1.87	2.19	1.31	3.65	0.00444	0.219
TLR10	1.5	0.503	0.509	2.48	2.82	1.42	5.58	0.00488	0.229
TANK	0.514	0.173	0.175	0.853	1.43	1.13	1.81	0.00493	0.229
CD81	0.465	0.156	0.158	0.771	1.38	1.12	1.71	0.00485	0.229
CD53	1.22	0.411	0.412	2.02	2.33	1.33	4.07	0.00503	0.23
FCGR2B	1.49	0.505	0.497	2.48	2.8	1.41	5.57	0.00526	0.238
ITGB2	1.09	0.371	0.363	1.82	2.13	1.29	3.53	0.00534	0.238
TNFRSF1A	0.639	0.218	0.211	1.07	1.56	1.16	2.1	0.0055	0.242
IL17RA	0.631	0.216	0.207	1.05	1.55	1.15	2.08	0.00563	0.244
POU2F2	1.52	0.521	0.496	2.54	2.86	1.41	5.81	0.00574	0.246
LAMP2	-0.931	0.321	-1.56	-0.301	0.524	0.339	0.811	0.00595	0.251
LTBR	0.821	0.287	0.258	1.38	1.77	1.2	2.61	0.00657	0.271
AXL	0.478	0.167	0.15	0.805	1.39	1.11	1.75	0.00657	0.271
PSMB7	-0.316	0.111	-0.534	-0.0987	0.803	0.691	0.934	0.00676	0.275
HLA-DMB	1.05	0.37	0.32	1.77	2.06	1.25	3.41	0.00717	0.288
TLR5	1.73	0.617	0.518	2.94	3.31	1.43	7.66	0.00771	0.295
CD38	1.53	0.549	0.456	2.61	2.89	1.37	6.1	0.00787	0.295
IL16	1.39	0.5	0.411	2.37	2.62	1.33	5.18	0.00805	0.295
IL10RA	1.35	0.485	0.399	2.3	2.55	1.32	4.93	0.00805	0.295
STAT6	0.681	0.243	0.204	1.16	1.6	1.15	2.23	0.00767	0.295
IL13RA1	0.673	0.241	0.201	1.15	1.59	1.15	2.21	0.00781	0.295
TGFB1	0.546	0.196	0.162	0.93	1.46	1.12	1.91	0.00801	0.295
AKT3	-0.904	0.322	-1.53	-0.273	0.535	0.345	0.828	0.00752	0.295
SERPING1	0.667	0.241	0.196	1.14	1.59	1.15	2.2	0.00824	0.298
ITGAM	1.17	0.425	0.34	2	2.25	1.27	4.01	0.00851	0.305
CSF1	1.71	0.625	0.484	2.93	3.27	1.4	7.63	0.0091	0.319
PLAU	1.27	0.463	0.36	2.17	2.41	1.28	4.51	0.00901	0.319
NFATC3	1.04	0.381	0.292	1.78	2.05	1.22	3.45	0.00931	0.319
HLA-DMA	0.827	0.303	0.232	1.42	1.77	1.17	2.68	0.00932	0.319
CD55	-0.647	0.238	-1.11	-0.18	0.639	0.462	0.883	0.00955	0.324
CIITA	0.817	0.303	0.224	1.41	1.76	1.17	2.66	0.00994	0.334
NCAM1	0.603	0.224	0.164	1.04	1.52	1.12	2.06	0.0101	0.337
ECSIT	-0.747	0.278	-1.29	-0.201	0.596	0.408	0.87	0.0104	0.342
CD68	0.981	0.367	0.262	1.7	1.97	1.2	3.25	0.0106	0.345
F12	-1.16	0.439	-2.02	-0.303	0.447	0.246	0.811	0.0113	0.364
CXCL16	1.09	0.415	0.28	1.91	2.13	1.21	3.75	0.0117	0.371
TOLLIP	-0.701	0.266	-1.22	-0.18	0.615	0.429	0.883	0.0116	0.371
MAPKAPK2	0.429	0.163	0.109	0.749	1.35	1.08	1.68	0.012	0.373
GPI	-0.568	0.216	-0.992	-0.144	0.675	0.503	0.905	0.012	0.373
CASP1	1.5	0.574	0.374	2.62	2.83	1.3	6.17	0.0124	0.382
BTK	1.43	0.55	0.355	2.51	2.7	1.28	5.7	0.0127	0.383
RUNX1	1.35	0.518	0.333	2.36	2.55	1.26	5.15	0.0127	0.383
NOTCH1	0.47	0.182	0.112	0.827	1.38	1.08	1.77	0.0136	0.406
CXCL12	1.17	0.454	0.277	2.05	2.24	1.21	4.15	0.0138	0.409
C2	1.25	0.488	0.293	2.21	2.38	1.23	4.61	0.0141	0.414
CD58	1.29	0.505	0.298	2.28	2.44	1.23	4.85	0.0145	0.422
NFATC2	1.01	0.399	0.232	1.79	2.02	1.17	3.47	0.0148	0.426
CD22	1.22	0.48	0.275	2.16	2.32	1.21	4.46	0.0151	0.432
CD33	1.14	0.452	0.249	2.02	2.2	1.19	4.06	0.016	0.453
CD36	-1.09	0.438	-1.95	-0.236	0.469	0.259	0.849	0.0165	0.463
TLR1	1.03	0.414	0.22	1.84	2.05	1.16	3.59	0.0168	0.467
IFNAR2	0.345	0.139	0.0728	0.618	1.27	1.05	1.53	0.0171	0.472
IKBKB	0.512	0.208	0.104	0.92	1.43	1.07	1.89	0.0182	0.498
LCP1	0.902	0.37	0.178	1.63	1.87	1.13	3.09	0.019	0.515
CD24	-0.979	0.402	-1.77	-0.191	0.507	0.294	0.876	0.0192	0.517
CLU	1.01	0.42	0.182	1.83	2.01	1.13	3.55	0.0213	0.565
ABL1	0.424	0.177	0.0766	0.772	1.34	1.05	1.71	0.0213	0.565
PVR	-0.403	0.17	-0.736	-0.0706	0.756	0.601	0.952	0.0221	0.581
FEZ1	0.402	0.17	0.0692	0.734	1.32	1.05	1.66	0.0226	0.588
CD83	-0.709	0.303	-1.3	-0.114	0.612	0.405	0.924	0.0244	0.629
MEF2C	-0.69	0.297	-1.27	-0.108	0.62	0.414	0.928	0.0251	0.644
CMKLR1	1.04	0.451	0.156	1.92	2.06	1.11	3.79	0.0261	0.665
LILRA1	1.19	0.517	0.172	2.2	2.28	1.13	4.6	0.0269	0.678
A2M	0.543	0.237	0.0784	1.01	1.46	1.06	2.01	0.0271	0.678
CASP8	1.01	0.441	0.142	1.87	2.01	1.1	3.66	0.0276	0.686
ITGA4	-0.72	0.318	-1.34	-0.0958	0.607	0.394	0.936	0.029	0.716
THY1	-0.699	0.31	-1.31	-0.0907	0.616	0.404	0.939	0.0296	0.724
LILRB1	1.39	0.62	0.172	2.6	2.62	1.13	6.08	0.0306	0.734
BST1	1.04	0.467	0.128	1.96	2.06	1.09	3.88	0.0309	0.734
HLA-DPA1	0.947	0.423	0.119	1.78	1.93	1.09	3.42	0.0303	0.734
ULBP2	-1.11	0.498	-2.09	-0.138	0.462	0.235	0.909	0.0307	0.734
TREM2	1.01	0.454	0.119	1.9	2.01	1.09	3.73	0.0317	0.748
IFIH1	1.17	0.532	0.128	2.21	2.25	1.09	4.64	0.0333	0.749
CYTIP	0.879	0.397	0.101	1.66	1.84	1.07	3.15	0.0322	0.749
CXCL2	0.836	0.379	0.0937	1.58	1.79	1.07	2.99	0.0328	0.749
PSEN1	0.393	0.178	0.0442	0.742	1.31	1.03	1.67	0.0327	0.749
ILF3	0.386	0.175	0.0421	0.729	1.31	1.03	1.66	0.0333	0.749
SPA17	-0.712	0.322	-1.34	-0.0819	0.61	0.394	0.945	0.0323	0.749
ARG2	-1.05	0.476	-1.98	-0.116	0.483	0.253	0.923	0.0331	0.749
CSF1R	0.707	0.323	0.0739	1.34	1.63	1.05	2.53	0.0342	0.758
IRF2	0.387	0.177	0.0408	0.733	1.31	1.03	1.66	0.034	0.758
TLR2	0.927	0.428	0.0881	1.77	1.9	1.06	3.4	0.0361	0.794
CTSL	0.398	0.185	0.0356	0.761	1.32	1.02	1.69	0.0372	0.809
CT45A1	-1.38	0.642	-2.64	-0.123	0.384	0.161	0.919	0.0373	0.809
LILRB2	1.12	0.52	0.0971	2.14	2.17	1.07	4.4	0.0376	0.812
TRAF3	-0.446	0.208	-0.854	-0.0376	0.734	0.553	0.974	0.0382	0.818
ITGA2	0.979	0.463	0.071	1.89	1.97	1.05	3.7	0.0406	0.863
IRAK1	0.517	0.245	0.0357	0.998	1.43	1.03	2	0.0413	0.873
ICOSLG	-0.705	0.335	-1.36	-0.0478	0.613	0.389	0.967	0.0415	0.873
ITGAL	1.09	0.52	0.068	2.11	2.12	1.05	4.31	0.0426	0.886
PIK3CD	0.683	0.327	0.0425	1.32	1.61	1.03	2.5	0.0427	0.886
CD44	0.747	0.358	0.0444	1.45	1.68	1.03	2.73	0.0433	0.889
AIF1	0.618	0.297	0.0364	1.2	1.54	1.03	2.3	0.0434	0.889
MIF	-0.409	0.197	-0.794	-0.0234	0.753	0.577	0.984	0.0438	0.891
CD180	1.22	0.59	0.067	2.38	2.34	1.05	5.21	0.0443	0.896
FN1	-0.571	0.277	-1.11	-0.0287	0.673	0.462	0.98	0.0453	0.91
PLAUR	1.07	0.519	0.0495	2.08	2.09	1.03	4.24	0.0461	0.921
RNF135	1.08	0.53	0.038	2.12	2.11	1.03	4.34	0.0485	0.951
LY96	0.89	0.438	0.0316	1.75	1.85	1.02	3.36	0.0485	0.951
PIK3CG	0.884	0.436	0.0303	1.74	1.85	1.02	3.34	0.0488	0.951
ITGB4	0.623	0.306	0.0237	1.22	1.54	1.02	2.33	0.0479	0.951
IFIT1	-0.471	0.233	-0.926	-0.0149	0.722	0.526	0.99	0.0494	0.957
IL13RA2	-1.15	0.569	-2.26	-0.0298	0.452	0.209	0.98	0.0506	0.976
VCAM1	1.17	0.584	0.0221	2.31	2.24	1.02	4.96	0.0522	0.977
LILRA5	1.15	0.571	0.028	2.26	2.21	1.02	4.8	0.051	0.977
IL4R	0.961	0.48	0.0201	1.9	1.95	1.01	3.74	0.0518	0.977
PIN1	-0.49	0.245	-0.97	-0.011	0.712	0.511	0.992	0.0514	0.977
SH2D1B	-1.16	0.577	-2.29	-0.0236	0.449	0.205	0.984	0.0519	0.977
CREB1	-0.239	0.12	-0.475	-0.00389	0.847	0.72	0.997	0.0529	0.983
IL1R2	1.29	0.712	-0.106	2.68	2.44	0.929	6.43	0.0772	1
SLC11A1	1.11	0.593	-0.0472	2.28	2.17	0.968	4.85	0.067	1
CCL3L1	1.08	0.663	-0.216	2.38	2.12	0.861	5.22	0.11	1
HLA-DQB1	1.07	1.03	-0.96	3.1	2.1	0.514	8.55	0.308	1
CD163	1.06	0.617	-0.147	2.27	2.09	0.903	4.83	0.0925	1
SBNO2	0.961	0.489	0.00198	1.92	1.95	1	3.78	0.0562	1
CCL4	0.952	0.585	-0.194	2.1	1.93	0.874	4.28	0.111	1
MUC1	0.951	0.511	-0.052	1.95	1.93	0.965	3.87	0.0701	1
SIGLEC1	0.932	0.61	-0.263	2.13	1.91	0.833	4.37	0.134	1
SELL	0.927	0.478	-0.0104	1.86	1.9	0.993	3.64	0.0593	1
MICA	0.918	0.493	-0.0476	1.88	1.89	0.968	3.69	0.0694	1
IRF1	0.881	0.504	-0.106	1.87	1.84	0.929	3.65	0.0876	1
CLEC7A	0.876	0.584	-0.27	2.02	1.83	0.829	4.06	0.142	1
LYN	0.847	0.441	-0.017	1.71	1.8	0.988	3.28	0.0615	1
CD4	0.819	0.414	0.00682	1.63	1.76	1	3.1	0.0547	1
ST6GAL1	0.812	0.533	-0.233	1.86	1.76	0.851	3.62	0.135	1
PRF1	0.807	0.525	-0.222	1.84	1.75	0.857	3.57	0.132	1
TYK2	0.795	0.461	-0.109	1.7	1.73	0.927	3.25	0.0923	1
MAP3K1	0.793	0.414	-0.0181	1.6	1.73	0.988	3.04	0.0622	1
JAK3	0.779	0.576	-0.349	1.91	1.72	0.785	3.75	0.183	1
TP53	0.766	0.435	-0.0871	1.62	1.7	0.941	3.07	0.0857	1
C1QA	0.755	0.389	-0.00652	1.52	1.69	0.995	2.86	0.0587	1
CREB5	0.754	0.469	-0.166	1.67	1.69	0.891	3.19	0.116	1
CSF2RB	0.753	0.381	0.00643	1.5	1.69	1	2.83	0.0546	1
CD48	0.748	0.521	-0.273	1.77	1.68	0.828	3.41	0.158	1
NFATC4	0.739	0.397	-0.0385	1.52	1.67	0.974	2.86	0.0695	1
CD14	0.739	0.415	-0.0733	1.55	1.67	0.95	2.93	0.0818	1
CCR1	0.727	0.524	-0.3	1.75	1.66	0.812	3.37	0.172	1
TNFRSF1B	0.726	0.376	-0.0111	1.46	1.65	0.992	2.76	0.0603	1
LAIR2	0.726	0.488	-0.231	1.68	1.65	0.852	3.21	0.145	1
LILRB3	0.725	0.592	-0.436	1.88	1.65	0.739	3.69	0.228	1
TLR7	0.719	0.424	-0.113	1.55	1.65	0.925	2.93	0.0976	1
CCRL2	0.697	0.503	-0.29	1.68	1.62	0.818	3.21	0.174	1
TNFRSF13C	0.697	0.558	-0.397	1.79	1.62	0.759	3.46	0.219	1
CYBB	0.696	0.41	-0.108	1.5	1.62	0.928	2.83	0.0971	1
FPR2	0.696	0.601	-0.482	1.87	1.62	0.716	3.66	0.253	1
ICAM1	0.69	0.499	-0.289	1.67	1.61	0.819	3.18	0.174	1
NFKB2	0.683	0.362	-0.0266	1.39	1.61	0.982	2.63	0.0662	1
NCF4	0.664	0.503	-0.322	1.65	1.58	0.8	3.14	0.194	1
FCGR3A	0.662	0.566	-0.448	1.77	1.58	0.733	3.42	0.249	1
ITGB3	0.661	0.543	-0.404	1.72	1.58	0.756	3.31	0.23	1
MASP1	0.655	0.399	-0.127	1.44	1.58	0.916	2.71	0.108	1
SH2B2	0.65	0.355	-0.0463	1.35	1.57	0.968	2.54	0.0744	1
SPP1	0.648	0.328	0.00392	1.29	1.57	1	2.45	0.0552	1
NFATC1	0.643	0.492	-0.321	1.61	1.56	0.8	3.05	0.198	1
STAT5B	0.636	0.369	-0.0881	1.36	1.55	0.941	2.57	0.0925	1
NLRP3	0.636	0.415	-0.177	1.45	1.55	0.885	2.73	0.133	1
IL1B	0.636	0.661	-0.658	1.93	1.55	0.634	3.81	0.341	1
CXCL1	0.634	0.515	-0.375	1.64	1.55	0.771	3.12	0.225	1
OAS3	0.629	0.494	-0.34	1.6	1.55	0.79	3.03	0.21	1
HCK	0.622	0.418	-0.197	1.44	1.54	0.872	2.71	0.144	1
TRAF3IP3	0.621	0.436	-0.234	1.48	1.54	0.85	2.78	0.162	1
CTSH	0.62	0.373	-0.111	1.35	1.54	0.926	2.55	0.104	1
CD97	0.617	0.426	-0.217	1.45	1.53	0.86	2.73	0.154	1
SPN	0.611	0.354	-0.0823	1.3	1.53	0.945	2.47	0.0914	1
IL3RA	0.608	0.563	-0.495	1.71	1.52	0.709	3.27	0.286	1
IRF5	0.602	0.348	-0.0804	1.28	1.52	0.946	2.44	0.0912	1
TLR6	0.597	0.431	-0.248	1.44	1.51	0.842	2.72	0.174	1
PDGFRB	0.593	0.325	-0.0451	1.23	1.51	0.969	2.35	0.0757	1
VEGFA	0.591	0.355	-0.105	1.29	1.51	0.93	2.44	0.104	1
HLA-G	0.58	0.538	-0.474	1.63	1.49	0.72	3.1	0.287	1
IL11RA	0.573	0.381	-0.173	1.32	1.49	0.887	2.49	0.14	1
FLT3LG	0.568	0.388	-0.194	1.33	1.48	0.874	2.51	0.151	1
ISG20	0.56	0.455	-0.332	1.45	1.47	0.794	2.74	0.226	1
CCL3	0.56	0.657	-0.729	1.85	1.47	0.604	3.6	0.399	1
ANXA1	0.552	0.31	-0.0568	1.16	1.47	0.961	2.23	0.0828	1
MAVS	0.541	0.297	-0.04	1.12	1.46	0.973	2.18	0.0751	1
CFI	0.539	0.423	-0.289	1.37	1.45	0.819	2.58	0.209	1
NOD2	0.536	0.611	-0.661	1.73	1.45	0.633	3.32	0.385	1
TNFSF4	0.535	0.476	-0.399	1.47	1.45	0.758	2.77	0.268	1
IRAK2	0.533	0.44	-0.33	1.4	1.45	0.796	2.63	0.233	1
CD37	0.524	0.477	-0.41	1.46	1.44	0.752	2.75	0.278	1
FCGR1A	0.524	0.63	-0.711	1.76	1.44	0.611	3.39	0.41	1
CDH1	0.523	0.503	-0.462	1.51	1.44	0.726	2.84	0.304	1
IKBKE	0.52	0.41	-0.283	1.32	1.43	0.822	2.5	0.211	1
AMICA1	0.515	0.533	-0.529	1.56	1.43	0.693	2.95	0.339	1
FCER1G	0.513	0.285	-0.0459	1.07	1.43	0.969	2.1	0.0792	1
C5	0.497	0.428	-0.342	1.34	1.41	0.789	2.53	0.252	1
NLRC5	0.489	0.463	-0.418	1.4	1.4	0.749	2.63	0.297	1
CFB	0.485	0.52	-0.535	1.51	1.4	0.69	2.84	0.356	1
PTGS2	0.478	0.496	-0.493	1.45	1.39	0.711	2.73	0.34	1
ICAM2	0.476	0.405	-0.318	1.27	1.39	0.802	2.41	0.246	1
TGFB2	0.474	0.42	-0.348	1.3	1.39	0.785	2.46	0.265	1
ALCAM	0.47	0.321	-0.158	1.1	1.39	0.896	2.14	0.15	1
RIPK2	0.466	0.407	-0.331	1.26	1.38	0.795	2.4	0.258	1
CASP3	0.462	0.338	-0.2	1.12	1.38	0.87	2.18	0.179	1
CDH5	0.46	0.439	-0.4	1.32	1.38	0.758	2.5	0.3	1
ADORA2A	0.453	0.436	-0.401	1.31	1.37	0.757	2.48	0.305	1
ITGA5	0.453	0.451	-0.43	1.34	1.37	0.742	2.52	0.321	1
TNFSF13B	0.45	0.459	-0.45	1.35	1.37	0.732	2.55	0.333	1
IL15RA	0.447	0.491	-0.516	1.41	1.36	0.699	2.66	0.368	1
ATF1	0.44	0.293	-0.135	1.01	1.36	0.911	2.02	0.141	1
CARD11	0.43	0.574	-0.695	1.56	1.35	0.618	2.94	0.458	1
HLA-DOB	0.427	0.527	-0.605	1.46	1.34	0.657	2.75	0.422	1
CCL5	0.422	0.48	-0.518	1.36	1.34	0.698	2.57	0.384	1
BCL6	0.421	0.227	-0.0237	0.866	1.34	0.984	1.82	0.0706	1
ELK1	0.414	0.539	-0.642	1.47	1.33	0.641	2.77	0.446	1
IL17RB	0.406	0.337	-0.255	1.07	1.32	0.838	2.09	0.235	1
NUP107	0.402	0.232	-0.053	0.857	1.32	0.964	1.81	0.0907	1
IFITM2	0.401	0.347	-0.278	1.08	1.32	0.825	2.11	0.254	1
RHOH	0.401	0.441	-0.464	1.27	1.32	0.725	2.41	0.369	1
TARP	0.399	0.483	-0.549	1.35	1.32	0.684	2.54	0.414	1
CD74	0.396	0.271	-0.136	0.927	1.32	0.91	1.9	0.152	1
SIGIRR	0.389	0.449	-0.491	1.27	1.31	0.712	2.41	0.391	1
TNFRSF11B	0.387	0.482	-0.559	1.33	1.31	0.679	2.52	0.427	1
CLEC4A	0.384	0.306	-0.216	0.984	1.31	0.861	1.98	0.216	1
C1R	0.384	0.314	-0.231	1	1.31	0.852	2	0.228	1
THBS1	0.383	0.482	-0.562	1.33	1.3	0.677	2.51	0.432	1
IFI35	0.382	0.388	-0.378	1.14	1.3	0.769	2.21	0.33	1
TIRAP	0.374	0.405	-0.419	1.17	1.3	0.748	2.25	0.36	1
DDX58	0.373	0.406	-0.423	1.17	1.29	0.746	2.25	0.364	1
ICAM3	0.368	0.389	-0.394	1.13	1.29	0.761	2.19	0.349	1
HLA-A	0.359	0.207	-0.0466	0.765	1.28	0.968	1.7	0.0901	1
EBI3	0.355	0.441	-0.508	1.22	1.28	0.703	2.33	0.425	1
MRC1	0.353	0.564	-0.753	1.46	1.28	0.593	2.75	0.535	1
TLR9	0.352	0.401	-0.434	1.14	1.28	0.74	2.2	0.385	1
PSMB10	0.351	0.359	-0.353	1.06	1.28	0.783	2.08	0.334	1
HLA-B	0.346	0.263	-0.17	0.861	1.27	0.889	1.82	0.196	1
NFKB1	0.342	0.439	-0.519	1.2	1.27	0.698	2.3	0.441	1
CARD9	0.334	0.409	-0.467	1.13	1.26	0.723	2.2	0.419	1
ATG5	0.334	0.595	-0.832	1.5	1.26	0.562	2.83	0.577	1
CD276	0.328	0.194	-0.0522	0.707	1.25	0.964	1.63	0.0983	1
ETS1	0.326	0.184	-0.034	0.687	1.25	0.977	1.61	0.0831	1
TXNIP	0.326	0.345	-0.35	1	1.25	0.785	2	0.35	1
PECAM1	0.317	0.217	-0.109	0.743	1.25	0.927	1.67	0.152	1
HLA-E	0.317	0.222	-0.12	0.753	1.25	0.92	1.68	0.162	1
C1S	0.317	0.264	-0.2	0.834	1.25	0.871	1.78	0.236	1
CXCL5	0.314	0.608	-0.878	1.51	1.24	0.544	2.84	0.608	1
CREBBP	0.312	0.287	-0.251	0.875	1.24	0.84	1.83	0.284	1
PSMB9	0.311	0.214	-0.108	0.729	1.24	0.928	1.66	0.153	1
RUNX3	0.308	0.431	-0.536	1.15	1.24	0.69	2.22	0.478	1
REL	0.307	0.247	-0.178	0.791	1.24	0.884	1.73	0.221	1
IRF7	0.307	0.328	-0.335	0.95	1.24	0.793	1.93	0.354	1
TNFRSF11A	0.3	0.452	-0.586	1.19	1.23	0.666	2.28	0.51	1
TNFRSF10C	0.293	0.55	-0.786	1.37	1.23	0.58	2.59	0.597	1
ITGA2B	0.283	0.436	-0.571	1.14	1.22	0.673	2.2	0.52	1
GNA13	0.273	0.165	-0.05	0.595	1.21	0.966	1.51	0.105	1
IGF1R	0.26	0.151	-0.0362	0.556	1.2	0.975	1.47	0.0928	1
ITGB1	0.25	0.145	-0.0347	0.535	1.19	0.976	1.45	0.0925	1
COLEC12	0.245	0.497	-0.728	1.22	1.19	0.604	2.33	0.624	1
NOD1	0.24	0.458	-0.658	1.14	1.18	0.634	2.2	0.603	1
YTHDF2	0.239	0.401	-0.546	1.02	1.18	0.685	2.03	0.554	1
MAST2	0.236	0.134	-0.0256	0.498	1.18	0.982	1.41	0.0843	1
NFKBIA	0.235	0.207	-0.172	0.641	1.18	0.888	1.56	0.264	1
CFD	0.234	0.474	-0.695	1.16	1.18	0.618	2.24	0.624	1
FOS	0.229	0.404	-0.564	1.02	1.17	0.677	2.03	0.574	1
TRAF6	0.225	0.153	-0.0762	0.525	1.17	0.949	1.44	0.151	1
HMGB1	0.219	0.214	-0.2	0.638	1.16	0.871	1.56	0.311	1
LTK	0.216	0.541	-0.845	1.28	1.16	0.557	2.42	0.692	1
GLMN	0.215	0.438	-0.644	1.07	1.16	0.64	2.1	0.626	1
MFGE8	0.208	0.239	-0.26	0.677	1.16	0.835	1.6	0.388	1
BST2	0.207	0.329	-0.437	0.851	1.15	0.739	1.8	0.533	1
IL18R1	0.195	0.63	-1.04	1.43	1.14	0.486	2.69	0.759	1
UBC	0.194	0.198	-0.195	0.583	1.14	0.874	1.5	0.334	1
ATP6AP2_e3e5	0.191	0.453	-0.696	1.08	1.14	0.617	2.11	0.675	1
TYROBP	0.19	0.332	-0.46	0.841	1.14	0.727	1.79	0.569	1
PSMB8	0.188	0.226	-0.255	0.63	1.14	0.838	1.55	0.411	1
IL1R1	0.188	0.379	-0.554	0.931	1.14	0.681	1.91	0.622	1
ADA	0.187	0.487	-0.768	1.14	1.14	0.587	2.21	0.704	1
TNFRSF14	0.185	0.356	-0.514	0.883	1.14	0.7	1.84	0.607	1
TNFSF12	0.181	0.187	-0.185	0.547	1.13	0.88	1.46	0.337	1
APOE	0.18	0.226	-0.262	0.623	1.13	0.834	1.54	0.429	1
IGF2R	0.177	0.464	-0.733	1.09	1.13	0.602	2.12	0.705	1
CD34	0.165	0.46	-0.737	1.07	1.12	0.6	2.09	0.722	1
TAL1	0.164	0.342	-0.506	0.833	1.12	0.704	1.78	0.635	1
F13A1	0.163	0.53	-0.876	1.2	1.12	0.545	2.3	0.759	1
DOCK9	0.161	0.183	-0.198	0.521	1.12	0.871	1.43	0.385	1
RELB	0.153	0.483	-0.795	1.1	1.11	0.576	2.14	0.753	1
ABCB1	0.151	0.214	-0.268	0.57	1.11	0.831	1.48	0.483	1
EWSR1	0.15	0.128	-0.101	0.402	1.11	0.932	1.32	0.248	1
ITCH	0.147	0.112	-0.0727	0.367	1.11	0.951	1.29	0.196	1
CARD8	0.146	0.408	-0.654	0.947	1.11	0.635	1.93	0.722	1
CKLF	0.143	0.178	-0.206	0.491	1.1	0.867	1.41	0.426	1
IRAK4	0.143	0.356	-0.555	0.841	1.1	0.681	1.79	0.69	1
ENTPD1	0.138	0.397	-0.64	0.916	1.1	0.642	1.89	0.73	1
MAPK3	0.134	0.144	-0.149	0.417	1.1	0.902	1.33	0.359	1
CEBPB	0.133	0.275	-0.407	0.672	1.1	0.754	1.59	0.632	1
PRKCD	0.13	0.192	-0.246	0.505	1.09	0.843	1.42	0.501	1
IFITM1	0.124	0.301	-0.465	0.713	1.09	0.724	1.64	0.683	1
ENG	0.116	0.25	-0.375	0.606	1.08	0.771	1.52	0.646	1
RORA	0.115	0.304	-0.48	0.71	1.08	0.717	1.64	0.708	1
MAP4K2	0.113	0.156	-0.194	0.419	1.08	0.874	1.34	0.475	1
TAB1	0.106	0.162	-0.21	0.423	1.08	0.864	1.34	0.514	1
MYD88	0.101	0.318	-0.522	0.724	1.07	0.696	1.65	0.752	1
ITGA6	0.078	0.177	-0.269	0.425	1.06	0.83	1.34	0.662	1
BMI1	0.0755	0.149	-0.217	0.368	1.05	0.86	1.29	0.616	1
TAP1	0.0728	0.406	-0.723	0.868	1.05	0.606	1.83	0.859	1
CD40	0.0707	0.442	-0.796	0.937	1.05	0.576	1.91	0.874	1
STAT3	0.0687	0.212	-0.347	0.484	1.05	0.786	1.4	0.748	1
RELA	0.0664	0.31	-0.542	0.675	1.05	0.687	1.6	0.832	1
IKBKG	0.0649	0.481	-0.878	1.01	1.05	0.544	2.01	0.893	1
ATG7	0.0566	0.103	-0.144	0.258	1.04	0.905	1.2	0.584	1
TFEB	0.0462	0.169	-0.285	0.377	1.03	0.821	1.3	0.786	1
FADD	0.0455	0.347	-0.634	0.725	1.03	0.644	1.65	0.896	1
TICAM2	0.045	0.471	-0.877	0.967	1.03	0.544	1.96	0.924	1
MAP3K5	0.0373	0.12	-0.197	0.272	1.03	0.872	1.21	0.757	1
HRAS	0.0349	0.211	-0.379	0.449	1.02	0.769	1.36	0.869	1
TNFRSF10B	0.0322	0.402	-0.756	0.821	1.02	0.592	1.77	0.937	1
PDGFC	0.0276	0.28	-0.522	0.577	1.02	0.697	1.49	0.922	1
LGALS3	0.0272	0.298	-0.556	0.611	1.02	0.68	1.53	0.928	1
CCL2	0.0226	0.719	-1.39	1.43	1.02	0.382	2.7	0.975	1
CX3CL1	0.02	0.409	-0.781	0.821	1.01	0.582	1.77	0.961	1
MAPK1	0.0189	0.317	-0.602	0.64	1.01	0.659	1.56	0.953	1
MAP3K7	0.0166	0.0794	-0.139	0.172	1.01	0.908	1.13	0.835	1
JAK1	0.0144	0.101	-0.183	0.212	1.01	0.881	1.16	0.887	1
TNFSF10	0.0048	0.536	-1.05	1.05	1	0.485	2.08	0.993	1
HLA-DQA1	-0.00106	0.986	-1.93	1.93	0.999	0.262	3.82	0.999	1
TFRC	-0.00467	0.228	-0.452	0.443	0.997	0.731	1.36	0.984	1
MICB	-0.0121	0.392	-0.781	0.757	0.992	0.582	1.69	0.976	1
ATG10	-0.0174	0.411	-0.824	0.789	0.988	0.565	1.73	0.966	1
COL3A1	-0.0288	0.475	-0.959	0.902	0.98	0.514	1.87	0.952	1
PPARG	-0.0324	0.351	-0.721	0.656	0.978	0.607	1.58	0.927	1
MARCO	-0.0352	0.506	-1.03	0.957	0.976	0.491	1.94	0.945	1
TCF7	-0.0409	0.534	-1.09	1.01	0.972	0.47	2.01	0.939	1
CD9	-0.0462	0.225	-0.487	0.394	0.969	0.714	1.31	0.838	1
TREM2_e1e2	-0.0471	0.302	-0.639	0.545	0.968	0.642	1.46	0.877	1
SMAD3	-0.0646	0.248	-0.551	0.421	0.956	0.683	1.34	0.796	1
BCL10	-0.0747	0.138	-0.345	0.195	0.95	0.788	1.14	0.59	1
MAPK8	-0.0787	0.271	-0.611	0.453	0.947	0.655	1.37	0.773	1
JAM3	-0.0794	0.157	-0.386	0.228	0.946	0.765	1.17	0.615	1
MX1	-0.0813	0.266	-0.602	0.439	0.945	0.659	1.36	0.761	1
C7	-0.0905	0.307	-0.693	0.512	0.939	0.619	1.43	0.77	1
PSEN2	-0.0937	0.34	-0.761	0.573	0.937	0.59	1.49	0.784	1
CD274	-0.0956	0.453	-0.984	0.793	0.936	0.505	1.73	0.834	1
HAMP	-0.106	0.846	-1.76	1.55	0.929	0.294	2.93	0.901	1
PLA2G6	-0.107	0.134	-0.369	0.155	0.929	0.774	1.11	0.429	1
IL12RB1	-0.107	0.43	-0.951	0.736	0.928	0.517	1.67	0.804	1
AIRE	-0.12	0.485	-1.07	0.83	0.92	0.477	1.78	0.806	1
MAPK14	-0.121	0.167	-0.448	0.206	0.92	0.733	1.15	0.472	1
NCK2	-0.128	0.213	-0.544	0.289	0.915	0.686	1.22	0.552	1
TRAF2	-0.133	0.256	-0.635	0.368	0.912	0.644	1.29	0.605	1
CD164	-0.141	0.249	-0.629	0.347	0.907	0.646	1.27	0.573	1
F2RL1	-0.142	0.587	-1.29	1.01	0.906	0.408	2.01	0.81	1
CYLD	-0.146	0.167	-0.473	0.182	0.904	0.72	1.13	0.388	1
TBK1	-0.15	0.119	-0.383	0.0835	0.901	0.767	1.06	0.215	1
SMAD2	-0.154	0.203	-0.551	0.244	0.899	0.682	1.18	0.453	1
TICAM1	-0.157	0.31	-0.766	0.451	0.897	0.588	1.37	0.615	1
MAF	-0.158	0.207	-0.563	0.247	0.896	0.677	1.19	0.448	1
HLA-C	-0.16	0.363	-0.87	0.551	0.895	0.547	1.47	0.662	1
CHUK	-0.168	0.168	-0.497	0.161	0.89	0.709	1.12	0.323	1
ITGAE	-0.171	0.407	-0.969	0.627	0.888	0.511	1.54	0.676	1
CXCR4	-0.193	0.524	-1.22	0.835	0.875	0.429	1.78	0.715	1
BCL2	-0.203	0.262	-0.716	0.31	0.869	0.609	1.24	0.442	1
CD8A	-0.205	0.414	-1.02	0.607	0.868	0.494	1.52	0.624	1
CCND3	-0.206	0.214	-0.625	0.213	0.867	0.648	1.16	0.341	1
RPS6	-0.209	0.258	-0.715	0.298	0.865	0.609	1.23	0.424	1
CXCL11	-0.211	0.693	-1.57	1.15	0.864	0.337	2.22	0.762	1
CDKN1A	-0.214	0.41	-1.02	0.59	0.862	0.494	1.5	0.604	1
HLA-DRB3	-0.218	0.356	-0.915	0.479	0.86	0.53	1.39	0.543	1
GTF3C1	-0.219	0.22	-0.65	0.212	0.859	0.637	1.16	0.325	1
MAP2K2	-0.22	0.12	-0.454	0.0149	0.859	0.73	1.01	0.0735	1
PYCARD	-0.222	0.424	-1.05	0.609	0.857	0.482	1.53	0.603	1
BAX	-0.234	0.192	-0.611	0.143	0.85	0.655	1.1	0.231	1
ITGA1	-0.236	0.229	-0.684	0.212	0.849	0.622	1.16	0.307	1
FYN	-0.237	0.239	-0.705	0.231	0.848	0.613	1.17	0.327	1
SYT17	-0.238	0.345	-0.913	0.438	0.848	0.531	1.35	0.494	1
IL1RAP	-0.247	0.231	-0.7	0.205	0.843	0.616	1.15	0.29	1
KLRC2	-0.259	0.676	-1.58	1.07	0.836	0.333	2.09	0.704	1
IL32	-0.26	0.669	-1.57	1.05	0.835	0.337	2.07	0.7	1
ATG12	-0.274	0.476	-1.21	0.658	0.827	0.433	1.58	0.568	1
THBD	-0.274	0.505	-1.26	0.715	0.827	0.417	1.64	0.59	1
IL15	-0.279	0.358	-0.981	0.422	0.824	0.507	1.34	0.44	1
CD47	-0.28	0.186	-0.645	0.0855	0.824	0.639	1.06	0.141	1
IRF3	-0.282	0.312	-0.894	0.331	0.823	0.538	1.26	0.372	1
PTGDR2	-0.287	0.62	-1.5	0.928	0.819	0.353	1.9	0.646	1
IFI27	-0.295	0.267	-0.817	0.228	0.815	0.568	1.17	0.275	1
CD63	-0.3	0.293	-0.874	0.275	0.812	0.546	1.21	0.312	1
CD247	-0.304	0.445	-1.18	0.568	0.81	0.442	1.48	0.498	1
ATG16L1	-0.305	0.172	-0.643	0.0324	0.809	0.64	1.02	0.0837	1
ATF2	-0.308	0.166	-0.634	0.0185	0.808	0.644	1.01	0.0715	1
VEGFC	-0.312	0.409	-1.11	0.491	0.806	0.462	1.41	0.45	1
TMEFF2	-0.319	0.244	-0.798	0.16	0.802	0.575	1.12	0.2	1
TAP2	-0.32	0.182	-0.676	0.0357	0.801	0.626	1.03	0.0851	1
FLT3	-0.338	0.49	-1.3	0.623	0.791	0.407	1.54	0.494	1
DUSP6	-0.339	0.256	-0.84	0.163	0.791	0.559	1.12	0.193	1
C4B	-0.348	0.357	-1.05	0.351	0.786	0.484	1.28	0.335	1
CXCR1	-0.36	0.494	-1.33	0.609	0.779	0.398	1.53	0.47	1
ZNF205	-0.364	0.371	-1.09	0.364	0.777	0.469	1.29	0.333	1
ISG15	-0.366	0.312	-0.978	0.247	0.776	0.508	1.19	0.249	1
TNFSF13	-0.386	0.307	-0.989	0.216	0.765	0.504	1.16	0.216	1
NT5E	-0.387	0.23	-0.838	0.0639	0.765	0.56	1.05	0.0999	1
TFE3	-0.39	0.418	-1.21	0.43	0.763	0.433	1.35	0.357	1
MCAM	-0.391	0.251	-0.884	0.101	0.762	0.542	1.07	0.127	1
MR1	-0.394	0.503	-1.38	0.591	0.761	0.385	1.51	0.438	1
STAT1	-0.398	0.303	-0.992	0.197	0.759	0.503	1.15	0.197	1
FOXJ1	-0.406	0.593	-1.57	0.756	0.755	0.337	1.69	0.497	1
LAMP1	-0.407	0.235	-0.868	0.0546	0.754	0.548	1.04	0.0913	1
CXCR2	-0.409	0.647	-1.68	0.86	0.753	0.313	1.81	0.531	1
CD3EAP	-0.41	0.296	-0.99	0.17	0.753	0.503	1.12	0.173	1
CXCL14	-0.411	0.317	-1.03	0.209	0.752	0.489	1.16	0.201	1
TAPBP	-0.427	0.234	-0.886	0.0317	0.744	0.541	1.02	0.0752	1
CD59	-0.429	0.315	-1.05	0.188	0.743	0.484	1.14	0.18	1
IFNAR1	-0.43	0.322	-1.06	0.201	0.742	0.479	1.15	0.189	1
MAPK11	-0.444	0.277	-0.988	0.099	0.735	0.504	1.07	0.116	1
NRP1	-0.464	0.309	-1.07	0.141	0.725	0.477	1.1	0.14	1
BID	-0.618	0.449	-1.5	0.263	0.651	0.354	1.2	0.176	1
EGR1	-0.622	0.549	-1.7	0.455	0.65	0.308	1.37	0.264	1
IFIT2	-0.625	0.378	-1.37	0.115	0.648	0.388	1.08	0.105	1
STAT4	-0.626	0.402	-1.41	0.162	0.648	0.375	1.12	0.127	1
IL1RAPL2	-0.637	0.521	-1.66	0.384	0.643	0.317	1.3	0.228	1
EPCAM	-0.651	0.477	-1.59	0.284	0.637	0.333	1.22	0.18	1
IL1RL1	-0.731	0.86	-2.42	0.955	0.603	0.187	1.94	0.4	1
HSD11B1	-0.738	0.427	-1.57	0.0981	0.6	0.336	1.07	0.091	1
ATM	-0.813	0.455	-1.71	0.079	0.569	0.307	1.06	0.0812	1
CD8B	-0.827	0.505	-1.82	0.163	0.564	0.284	1.12	0.109	1
SLAMF7	-1.11	0.635	-2.36	0.132	0.463	0.195	1.1	0.0872	1
CCL19	-1.25	0.671	-2.56	0.0667	0.421	0.169	1.05	0.0698	1

## Sheet: Table S7
Supplemental Table 7: Differentially expressed genes shared between Nanostring dataset and NHD microglia cluster from snRNA-seq (Zhou et al 2023)
	NHD iMGL		NHD Microglia snRNAseq
Gene List	Log2 fold change	P value	Log2 fold change	P value
IL8 (CXCL8)	3.95	6.86e-07	.	.
CD99	1.37	9.36e-07	.	.
JAK2	0.655	3.58e-07	.	.
PRKCE	-1.62	2.71e-06	.	.
STAT2	1.35	4.56e-06	.	.
OLR1	1.91	1.29e-05	-0.927743	9.2299e-05
CTSS	1.95	1.93e-05	.	.
[truncated: 161 more rows]
